# Supplementary material for: Causal associations between gut microbiota and premature rupture of membranes: a two-sample Mendelian randomization study
Source: Front Immunol. 2024 Sep 2;15:1440232. doi: 10.3389/fimmu.2024.1440232 (PMC11402717; doi:10.3389/fimmu.2024.1440232)
Supplement: Supplementary file 1 [file Table1.xlsx]

## Sheet: IV results
Instrumental variables used in MR analysis of the association between gut microbiota and PROM.
Abbreviation: single-nucleotide polymorphism (SNP); effect allele (EA); other allele (OA); effect sizes (β); standard error (SE).
				exposure (microbiota)									outcome (premature rupture of membranes)
	SNP	EA	OA	β	SE	pval	samplesize	R2	F-statistic	gut microbiota	id.exposure		β	SE	pval	control	case	id.outcome
1	rs10841473	G	C	-0.0583765	0.0123353	2.59e-06	14306	0.00156307	22.3932	class Actinobacteria id.419	ebi-a-GCST90016908		-0.0533	0.0317	0.0927897	104247	3011	finn-b-O15_MEMBR_PREMAT_RUPT
2	rs11655079	T	C	-0.0560674	0.0124286	5.93e-06	14306	0.0014205	20.3477	class Actinobacteria id.419	ebi-a-GCST90016908		-0.0068	0.0344	0.843	104247	3011	finn-b-O15_MEMBR_PREMAT_RUPT
3	rs11745923	G	T	0.0563759	0.0115529	1.58e-06	14306	0.00166175	23.8092	class Actinobacteria id.419	ebi-a-GCST90016908		-0.0193	0.0274	0.4811	104247	3011	finn-b-O15_MEMBR_PREMAT_RUPT
4	rs12049045	A	G	0.0510452	0.0114325	8.63e-06	14306	0.00139157	19.9327	class Actinobacteria id.419	ebi-a-GCST90016908		0.0235	0.0275	0.3936	104247	3011	finn-b-O15_MEMBR_PREMAT_RUPT
5	rs12899991	T	A	-0.0719923	0.0154661	4.03e-06	14306	0.00151229	21.6646	class Actinobacteria id.419	ebi-a-GCST90016908		-0.0435	0.0315	0.1668	104247	3011	finn-b-O15_MEMBR_PREMAT_RUPT
6	rs134366	A	G	-0.111877	0.023501	1.5e-06	14306	0.00158162	22.6594	class Actinobacteria id.419	ebi-a-GCST90016908		0.0373	0.053	0.4818	104247	3011	finn-b-O15_MEMBR_PREMAT_RUPT
7	rs1376754	G	A	0.0509242	0.0112503	6.71e-06	14306	0.00143015	20.4861	class Actinobacteria id.419	ebi-a-GCST90016908		0.0145	0.0269	0.589599	104247	3011	finn-b-O15_MEMBR_PREMAT_RUPT
8	rs1515761	C	T	-0.0762317	0.0169884	4.96e-06	14306	0.00140552	20.1329	class Actinobacteria id.419	ebi-a-GCST90016908		-0.0153	0.0514	0.766399	104247	3011	finn-b-O15_MEMBR_PREMAT_RUPT
9	rs182549	T	C	-0.111489	0.012066	3.79e-20	14306	0.00593246	85.3644	class Actinobacteria id.419	ebi-a-GCST90016908		-0.0212	0.0272	0.435	104247	3011	finn-b-O15_MEMBR_PREMAT_RUPT
10	rs4945008	G	A	-0.0540741	0.0121393	5.39e-06	14306	0.00138507	19.8395	class Actinobacteria id.419	ebi-a-GCST90016908		0.0092	0.0275	0.737199	104247	3011	finn-b-O15_MEMBR_PREMAT_RUPT
11	rs6660520	G	A	-0.0711483	0.0134495	1.11e-07	14306	0.00195232	27.9805	class Actinobacteria id.419	ebi-a-GCST90016908		-0.0688	0.0301	0.02246	104247	3011	finn-b-O15_MEMBR_PREMAT_RUPT
12	rs72767435	T	C	-0.126352	0.0273626	2.57e-06	14306	0.00148828	21.3201	class Actinobacteria id.419	ebi-a-GCST90016908		-0.0541	0.0594	0.3622	104247	3011	finn-b-O15_MEMBR_PREMAT_RUPT
13	rs7322849	T	C	0.0944467	0.0192976	6.21e-07	14306	0.00167156	23.95	class Actinobacteria id.419	ebi-a-GCST90016908		-0.011	0.0467	0.8146	104247	3011	finn-b-O15_MEMBR_PREMAT_RUPT
14	rs7700479	T	A	-0.0769653	0.0173933	8.62e-06	14306	0.00136683	19.5779	class Actinobacteria id.419	ebi-a-GCST90016908		0.0265	0.0438	0.5448	104247	3011	finn-b-O15_MEMBR_PREMAT_RUPT
15	rs80083040	T	G	0.155784	0.0348017	8.62e-06	14306	0.00139868	20.0348	class Actinobacteria id.419	ebi-a-GCST90016908		0.0091	0.065	0.8881	104247	3011	finn-b-O15_MEMBR_PREMAT_RUPT
16	rs8047955	G	A	-0.0575816	0.0116762	8.34e-07	14306	0.0016971	24.3166	class Actinobacteria id.419	ebi-a-GCST90016908		0.0343	0.0276	0.2127	104247	3011	finn-b-O15_MEMBR_PREMAT_RUPT
17	rs857444	C	T	0.0509553	0.011539	8.92e-06	14306	0.00136123	19.4976	class Actinobacteria id.419	ebi-a-GCST90016908		-0.0162	0.0277	0.5586	104247	3011	finn-b-O15_MEMBR_PREMAT_RUPT
18	rs961091	G	A	0.0501255	0.011255	8.68e-06	14306	0.00138454	19.832	class Actinobacteria id.419	ebi-a-GCST90016908		0.0096	0.0277	0.728799	104247	3011	finn-b-O15_MEMBR_PREMAT_RUPT
19	rs10803434	A	T	-0.0692742	0.0148866	3.55e-06	14306	0.00151139	21.6517	class Alphaproteobacteria id.2379	ebi-a-GCST90016909		-0.0472	0.0267	0.0776193	104247	3011	finn-b-O15_MEMBR_PREMAT_RUPT
20	rs12977163	G	C	0.0690234	0.0153829	7.14e-06	14306	0.00140536	20.1305	class Alphaproteobacteria id.2379	ebi-a-GCST90016909		0.0087	0.0275	0.7508	104247	3011	finn-b-O15_MEMBR_PREMAT_RUPT
21	rs140912403	C	T	-0.160677	0.0317708	6.2e-07	14306	0.00178467	25.5735	class Alphaproteobacteria id.2379	ebi-a-GCST90016909		-0.0098	0.0571	0.8642	104247	3011	finn-b-O15_MEMBR_PREMAT_RUPT
22	rs17061716	G	C	0.0927341	0.0207569	9.33e-06	14306	0.00139325	19.9569	class Alphaproteobacteria id.2379	ebi-a-GCST90016909		0.0314	0.0367	0.3922	104247	3011	finn-b-O15_MEMBR_PREMAT_RUPT
23	rs34569731	G	A	-0.0705145	0.0157564	7.38e-06	14306	0.00139803	20.0254	class Alphaproteobacteria id.2379	ebi-a-GCST90016909		0.0438	0.0279	0.1157	104247	3011	finn-b-O15_MEMBR_PREMAT_RUPT
24	rs55876211	C	T	-0.080811	0.0184159	7.54e-06	14306	0.00134417	19.2528	class Alphaproteobacteria id.2379	ebi-a-GCST90016909		-0.0022	0.0306	0.9417	104247	3011	finn-b-O15_MEMBR_PREMAT_RUPT
25	rs62285697	C	T	0.0805256	0.0180912	9.76e-06	14306	0.00138297	19.8095	class Alphaproteobacteria id.2379	ebi-a-GCST90016909		0.0243	0.0308	0.4311	104247	3011	finn-b-O15_MEMBR_PREMAT_RUPT
26	rs76784716	A	G	0.133271	0.0267738	5.09e-07	14306	0.00172895	24.7737	class Alphaproteobacteria id.2379	ebi-a-GCST90016909		0.0067	0.0421	0.8741	104247	3011	finn-b-O15_MEMBR_PREMAT_RUPT
27	rs7960664	A	G	-0.0969489	0.0215149	8.84e-06	14306	0.00141734	20.3024	class Alphaproteobacteria id.2379	ebi-a-GCST90016909		0.0036	0.0481	0.9405	104247	3011	finn-b-O15_MEMBR_PREMAT_RUPT
28	rs9813022	A	G	-0.0751277	0.0153867	1.05e-06	14306	0.00166367	23.8368	class Alphaproteobacteria id.2379	ebi-a-GCST90016909		-0.0026	0.0276	0.9251	104247	3011	finn-b-O15_MEMBR_PREMAT_RUPT
29	rs11110282	A	G	-0.101189	0.0217379	4.85e-06	14306	0.00151236	21.6656	class Bacilli id.1673	ebi-a-GCST90016910		0.0694	0.0627	0.2681	104247	3011	finn-b-O15_MEMBR_PREMAT_RUPT
30	rs111552159	C	G	0.128032	0.0286921	9.13e-06	14306	0.00138992	19.9091	class Bacilli id.1673	ebi-a-GCST90016910		0.0746	0.0648	0.2499	104247	3011	finn-b-O15_MEMBR_PREMAT_RUPT
31	rs11730038	G	A	-0.0630747	0.0128717	1.96e-06	14306	0.00167568	24.0092	class Bacilli id.1673	ebi-a-GCST90016910		0.02	0.0294	0.4956	104247	3011	finn-b-O15_MEMBR_PREMAT_RUPT
32	rs12797734	T	C	0.0572158	0.0126793	7.21e-06	14306	0.00142136	20.3601	class Bacilli id.1673	ebi-a-GCST90016910		0.0435	0.031	0.1607	104247	3011	finn-b-O15_MEMBR_PREMAT_RUPT
33	rs13068444	A	G	0.0601035	0.0136407	9.53e-06	14306	0.00135525	19.4118	class Bacilli id.1673	ebi-a-GCST90016910		-0.0631	0.035	0.0715698	104247	3011	finn-b-O15_MEMBR_PREMAT_RUPT
34	rs1595463	C	A	0.0476864	0.0108547	7.97e-06	14306	0.00134725	19.2971	class Bacilli id.1673	ebi-a-GCST90016910		0.0245	0.027	0.3644	104247	3011	finn-b-O15_MEMBR_PREMAT_RUPT
35	rs1962325	G	C	-0.0554219	0.0114789	1.38e-06	14306	0.00162681	23.3078	class Bacilli id.1673	ebi-a-GCST90016910		0.0464	0.0282	0.1006	104247	3011	finn-b-O15_MEMBR_PREMAT_RUPT
36	rs28564647	T	G	-0.0613034	0.0137579	7.81e-06	14306	0.00138594	19.852	class Bacilli id.1673	ebi-a-GCST90016910		-0.0579	0.0359	0.1069	104247	3011	finn-b-O15_MEMBR_PREMAT_RUPT
37	rs2952251	G	A	0.0598868	0.0123903	1.08e-06	14306	0.00163032	23.3581	class Bacilli id.1673	ebi-a-GCST90016910		-0.0143	0.0349	0.680801	104247	3011	finn-b-O15_MEMBR_PREMAT_RUPT
38	rs34989881	A	G	0.111056	0.0246039	6.55e-06	14306	0.00142213	20.3711	class Bacilli id.1673	ebi-a-GCST90016910		0.053	0.0637	0.4049	104247	3011	finn-b-O15_MEMBR_PREMAT_RUPT
39	rs35344081	G	A	0.0619529	0.0127066	1.01e-06	14306	0.00165892	23.7686	class Bacilli id.1673	ebi-a-GCST90016910		0.0264	0.0304	0.3857	104247	3011	finn-b-O15_MEMBR_PREMAT_RUPT
40	rs4028634	C	T	-0.0520614	0.0109842	2.21e-06	14306	0.00156782	22.4613	class Bacilli id.1673	ebi-a-GCST90016910		-0.0091	0.0278	0.7435	104247	3011	finn-b-O15_MEMBR_PREMAT_RUPT
41	rs4459992	T	C	0.0535854	0.0116362	4.3e-06	14306	0.00148016	21.2036	class Bacilli id.1673	ebi-a-GCST90016910		-0.0383	0.0285	0.178	104247	3011	finn-b-O15_MEMBR_PREMAT_RUPT
42	rs57872228	C	T	-0.0714773	0.0146647	9.22e-07	14306	0.00165787	23.7536	class Bacilli id.1673	ebi-a-GCST90016910		-0.056	0.042	0.1819	104247	3011	finn-b-O15_MEMBR_PREMAT_RUPT
43	rs694949	A	G	-0.081146	0.0180042	7.6e-06	14306	0.00141792	20.3107	class Bacilli id.1673	ebi-a-GCST90016910		0.0393	0.0458	0.3905	104247	3011	finn-b-O15_MEMBR_PREMAT_RUPT
44	rs74352383	T	A	-0.104496	0.0217083	1.53e-06	14306	0.00161706	23.1679	class Bacilli id.1673	ebi-a-GCST90016910		0.013	0.0488	0.7904	104247	3011	finn-b-O15_MEMBR_PREMAT_RUPT
45	rs74663707	C	T	0.0979154	0.0224074	8.46e-06	14306	0.00133297	19.0923	class Bacilli id.1673	ebi-a-GCST90016910		-0.0985	0.0545	0.0707799	104247	3011	finn-b-O15_MEMBR_PREMAT_RUPT
46	rs7666190	A	C	0.104044	0.0247934	8.47e-06	14306	0.00122945	17.6076	class Bacilli id.1673	ebi-a-GCST90016910		0.0271	0.0417	0.5153	104247	3011	finn-b-O15_MEMBR_PREMAT_RUPT
47	rs76717940	T	A	0.156331	0.0325945	1.07e-06	14306	0.00160541	23.0007	class Bacilli id.1673	ebi-a-GCST90016910		0.0677	0.0585	0.2466	104247	3011	finn-b-O15_MEMBR_PREMAT_RUPT
48	rs77558518	A	G	-0.107255	0.0222879	1.34e-06	14306	0.00161613	23.1545	class Bacilli id.1673	ebi-a-GCST90016910		-0.0311	0.0455	0.4938	104247	3011	finn-b-O15_MEMBR_PREMAT_RUPT
49	rs78938557	T	C	0.108007	0.0232858	1.07e-06	14306	0.00150159	21.511	class Bacilli id.1673	ebi-a-GCST90016910		0.0065	0.0802	0.9353	104247	3011	finn-b-O15_MEMBR_PREMAT_RUPT
50	rs9581006	T	C	-0.225309	0.0467697	1.79e-06	14306	0.00161959	23.2042	class Bacilli id.1673	ebi-a-GCST90016910		-0.0452	0.0707	0.5225	104247	3011	finn-b-O15_MEMBR_PREMAT_RUPT
51	rs11146701	A	G	0.0473596	0.010541	7.08e-06	14306	0.00140904	20.1833	class Bacteroidia id.912	ebi-a-GCST90016911		-0.0332	0.0353	0.3473	104247	3011	finn-b-O15_MEMBR_PREMAT_RUPT
52	rs13291169	C	G	0.0689676	0.0148765	3.75e-06	14306	0.00150009	21.4896	class Bacteroidia id.912	ebi-a-GCST90016911		-0.0156	0.0386	0.686501	104247	3011	finn-b-O15_MEMBR_PREMAT_RUPT
53	rs17343978	A	C	-0.0552057	0.0120278	8.36e-06	14306	0.00147041	21.0637	class Bacteroidia id.912	ebi-a-GCST90016911		-0.0466	0.033	0.1576	104247	3011	finn-b-O15_MEMBR_PREMAT_RUPT
54	rs2032750	C	T	0.0508393	0.0106807	1.92e-06	14306	0.00158123	22.6537	class Bacteroidia id.912	ebi-a-GCST90016911		-0.0194	0.0268	0.4695	104247	3011	finn-b-O15_MEMBR_PREMAT_RUPT
55	rs2363574	T	C	0.222741	0.0508055	9.93e-06	14306	0.00134177	19.2184	class Bacteroidia id.912	ebi-a-GCST90016911		0.0674	0.0692	0.3296	104247	3011	finn-b-O15_MEMBR_PREMAT_RUPT
56	rs4146051	G	A	0.107377	0.0245661	8.76e-06	14306	0.00133368	19.1025	class Bacteroidia id.912	ebi-a-GCST90016911		0.0406	0.05	0.4168	104247	3011	finn-b-O15_MEMBR_PREMAT_RUPT
57	rs4916508	A	G	0.0466729	0.0105312	8.47e-06	14306	0.00137107	19.6387	class Bacteroidia id.912	ebi-a-GCST90016911		-0.0253	0.0271	0.3491	104247	3011	finn-b-O15_MEMBR_PREMAT_RUPT
58	rs55773148	G	A	-0.121514	0.0236759	3.9e-07	14306	0.0018379	26.3378	class Bacteroidia id.912	ebi-a-GCST90016911		-0.037	0.0596	0.5351	104247	3011	finn-b-O15_MEMBR_PREMAT_RUPT
59	rs62531359	T	G	0.0655728	0.0149891	9.09e-06	14306	0.00133597	19.1353	class Bacteroidia id.912	ebi-a-GCST90016911		-0.0174	0.0346	0.6155	104247	3011	finn-b-O15_MEMBR_PREMAT_RUPT
60	rs62575403	C	T	0.140055	0.0311128	7.06e-06	14306	0.00141445	20.2609	class Bacteroidia id.912	ebi-a-GCST90016911		-0.1514	0.0667	0.02319	104247	3011	finn-b-O15_MEMBR_PREMAT_RUPT
61	rs72706335	T	C	-0.22241	0.0493458	7.66e-06	14306	0.00141799	20.3118	class Bacteroidia id.912	ebi-a-GCST90016911		-0.0193	0.0844	0.819	104247	3011	finn-b-O15_MEMBR_PREMAT_RUPT
62	rs73975615	G	A	-0.207018	0.0442633	1.22e-06	14306	0.00152668	21.871	class Bacteroidia id.912	ebi-a-GCST90016911		-0.0665	0.1522	0.6622	104247	3011	finn-b-O15_MEMBR_PREMAT_RUPT
63	rs7546249	A	T	0.0567113	0.0118386	1.55e-06	14306	0.00160149	22.9445	class Bacteroidia id.912	ebi-a-GCST90016911		0.0158	0.0293	0.59	104247	3011	finn-b-O15_MEMBR_PREMAT_RUPT
64	rs7631304	G	A	-0.0645771	0.0132957	8.37e-07	14306	0.00164627	23.5871	class Bacteroidia id.912	ebi-a-GCST90016911		-0.0221	0.0376	0.5569	104247	3011	finn-b-O15_MEMBR_PREMAT_RUPT
65	rs79585701	A	C	0.0646823	0.0149628	9.99e-06	14306	0.00130455	18.6846	class Bacteroidia id.912	ebi-a-GCST90016911		0.0023	0.0382	0.951	104247	3011	finn-b-O15_MEMBR_PREMAT_RUPT
66	rs929878	T	C	0.0548532	0.012153	4.73e-06	14306	0.001422	20.3693	class Bacteroidia id.912	ebi-a-GCST90016911		-0.0771	0.0327	0.0182398	104247	3011	finn-b-O15_MEMBR_PREMAT_RUPT
67	rs11128180	A	G	0.0592944	0.0128769	3.67e-06	14306	0.00147994	21.2004	class Betaproteobacteria id.2867	ebi-a-GCST90016912		0.0212	0.0315	0.5012	104247	3011	finn-b-O15_MEMBR_PREMAT_RUPT
68	rs12467854	G	C	0.0641363	0.0131766	1.1e-06	14306	0.00165335	23.6887	class Betaproteobacteria id.2867	ebi-a-GCST90016912		0.0464	0.0328	0.1575	104247	3011	finn-b-O15_MEMBR_PREMAT_RUPT
69	rs1511453	A	G	0.0923492	0.0199158	4.76e-06	14306	0.00150072	21.4986	class Betaproteobacteria id.2867	ebi-a-GCST90016912		-0.091	0.0566	0.108	104247	3011	finn-b-O15_MEMBR_PREMAT_RUPT
70	rs1928341	G	A	-0.0525581	0.0110408	2.02e-06	14306	0.00158151	22.6578	class Betaproteobacteria id.2867	ebi-a-GCST90016912		-0.0054	0.0272	0.8413	104247	3011	finn-b-O15_MEMBR_PREMAT_RUPT
71	rs2321387	G	A	-0.0494596	0.0109424	5.8e-06	14306	0.00142606	20.4275	class Betaproteobacteria id.2867	ebi-a-GCST90016912		0.0051	0.027	0.8505	104247	3011	finn-b-O15_MEMBR_PREMAT_RUPT
72	rs2367850	G	C	0.064006	0.0130374	9.12e-07	14306	0.00168194	24.099	class Betaproteobacteria id.2867	ebi-a-GCST90016912		0.014	0.0329	0.671301	104247	3011	finn-b-O15_MEMBR_PREMAT_RUPT
73	rs2613606	T	C	0.0513106	0.0109091	2.2e-06	14306	0.001544	22.1195	class Betaproteobacteria id.2867	ebi-a-GCST90016912		-0.0375	0.0271	0.1669	104247	3011	finn-b-O15_MEMBR_PREMAT_RUPT
74	rs320161	G	A	-0.0572286	0.01262	7.33e-06	14306	0.00143538	20.5611	class Betaproteobacteria id.2867	ebi-a-GCST90016912		-0.0537	0.0317	0.0899208	104247	3011	finn-b-O15_MEMBR_PREMAT_RUPT
75	rs4033856	T	C	-0.0832423	0.0167237	5.17e-07	14306	0.00172884	24.7721	class Betaproteobacteria id.2867	ebi-a-GCST90016912		-0.0752	0.0477	0.1145	104247	3011	finn-b-O15_MEMBR_PREMAT_RUPT
76	rs56386628	C	T	-0.0622252	0.0135688	5.87e-06	14306	0.00146789	21.0276	class Betaproteobacteria id.2867	ebi-a-GCST90016912		-0.0168	0.0307	0.5843	104247	3011	finn-b-O15_MEMBR_PREMAT_RUPT
77	rs6087811	T	G	-0.0978177	0.0198522	7.44e-07	14306	0.00169419	24.2749	class Betaproteobacteria id.2867	ebi-a-GCST90016912		0.0923	0.0443	0.0371997	104247	3011	finn-b-O15_MEMBR_PREMAT_RUPT
78	rs62395635	T	C	0.109741	0.0236	2.94e-06	14306	0.00150917	21.6199	class Betaproteobacteria id.2867	ebi-a-GCST90016912		-0.0789	0.0559	0.1586	104247	3011	finn-b-O15_MEMBR_PREMAT_RUPT
79	rs72747231	C	G	-0.137281	0.0290338	2.06e-06	14306	0.00156033	22.3539	class Betaproteobacteria id.2867	ebi-a-GCST90016912		-0.007	0.063	0.912	104247	3011	finn-b-O15_MEMBR_PREMAT_RUPT
80	rs75242906	C	T	-0.121083	0.028075	9.27e-06	14306	0.00129851	18.598	class Betaproteobacteria id.2867	ebi-a-GCST90016912		0.0175	0.0485	0.7175	104247	3011	finn-b-O15_MEMBR_PREMAT_RUPT
81	rs10209007	G	C	0.0794173	0.0182427	9.89e-06	14306	0.001323	18.9492	class Clostridia id.1859	ebi-a-GCST90016913		0.0576	0.0598	0.3353	104247	3011	finn-b-O15_MEMBR_PREMAT_RUPT
82	rs10774377	G	A	-0.052659	0.0113858	3.24e-06	14306	0.00149297	21.3874	class Clostridia id.1859	ebi-a-GCST90016913		0.0131	0.027	0.6269	104247	3011	finn-b-O15_MEMBR_PREMAT_RUPT
83	rs112334273	G	A	0.0641008	0.0127404	3.81e-07	14306	0.00176634	25.3105	class Clostridia id.1859	ebi-a-GCST90016913		0.0041	0.0299	0.8922	104247	3011	finn-b-O15_MEMBR_PREMAT_RUPT
84	rs13105690	C	T	0.0529097	0.011818	8.78e-06	14306	0.00139912	20.0411	class Clostridia id.1859	ebi-a-GCST90016913		0.0417	0.0298	0.1615	104247	3011	finn-b-O15_MEMBR_PREMAT_RUPT
85	rs13179700	C	T	-0.0511937	0.0109569	3.37e-06	14306	0.00152362	21.8271	class Clostridia id.1859	ebi-a-GCST90016913		0.0003	0.0282	0.9912	104247	3011	finn-b-O15_MEMBR_PREMAT_RUPT
86	rs13421739	C	G	0.0888472	0.0179655	9.54e-06	14306	0.00170667	24.4539	class Clostridia id.1859	ebi-a-GCST90016913		-0.0326	0.0526	0.5352	104247	3011	finn-b-O15_MEMBR_PREMAT_RUPT
87	rs1842454	G	A	-0.0547202	0.0127338	8.72e-06	14306	0.00128914	18.4637	class Clostridia id.1859	ebi-a-GCST90016913		0.042	0.0343	0.2205	104247	3011	finn-b-O15_MEMBR_PREMAT_RUPT
88	rs2273429	A	G	-0.0724037	0.0153105	4.52e-06	14306	0.0015608	22.3605	class Clostridia id.1859	ebi-a-GCST90016913		-0.0068	0.0435	0.8767	104247	3011	finn-b-O15_MEMBR_PREMAT_RUPT
89	rs6797343	T	G	-0.0592279	0.0134556	9.36e-06	14306	0.00135251	19.3725	class Clostridia id.1859	ebi-a-GCST90016913		0.029	0.0339	0.3935	104247	3011	finn-b-O15_MEMBR_PREMAT_RUPT
90	rs6814436	C	T	-0.0739995	0.0150815	9.65e-07	14306	0.00168004	24.0718	class Clostridia id.1859	ebi-a-GCST90016913		-0.0617	0.0383	0.1071	104247	3011	finn-b-O15_MEMBR_PREMAT_RUPT
91	rs6815608	C	T	-0.103803	0.0210883	4.02e-07	14306	0.00169077	24.2257	class Clostridia id.1859	ebi-a-GCST90016913		0.0603	0.0373	0.1055	104247	3011	finn-b-O15_MEMBR_PREMAT_RUPT
92	rs6934062	G	C	0.0524406	0.0116115	6.53e-06	14306	0.00142371	20.3938	class Clostridia id.1859	ebi-a-GCST90016913		-0.0118	0.0287	0.6815	104247	3011	finn-b-O15_MEMBR_PREMAT_RUPT
93	rs7269302	A	T	-0.0963981	0.0212007	9.04e-06	14306	0.00144308	20.6717	class Clostridia id.1859	ebi-a-GCST90016913		0.0338	0.0556	0.5427	104247	3011	finn-b-O15_MEMBR_PREMAT_RUPT
94	rs72738886	T	C	0.0866169	0.0190393	8.24e-06	14306	0.00144463	20.6939	class Clostridia id.1859	ebi-a-GCST90016913		0.0305	0.0505	0.5466	104247	3011	finn-b-O15_MEMBR_PREMAT_RUPT
95	rs72915163	T	C	-0.0581025	0.0120557	1.34e-06	14306	0.001621	23.2244	class Clostridia id.1859	ebi-a-GCST90016913		-0.0079	0.0327	0.8078	104247	3011	finn-b-O15_MEMBR_PREMAT_RUPT
96	rs72915163	T	C	-0.0581025	0.0120557	1.34e-06	14306	0.001621	23.2244	class Clostridia id.1859	ebi-a-GCST90016913		-0.5384	0.6408	0.4008	104247	3011	finn-b-O15_MEMBR_PREMAT_RUPT
97	rs76860606	C	G	0.0947036	0.0225117	7.53e-06	14306	0.00123555	17.6952	class Clostridia id.1859	ebi-a-GCST90016913		0.0296	0.0472	0.5302	104247	3011	finn-b-O15_MEMBR_PREMAT_RUPT
98	rs992074	T	C	-0.255639	0.0508787	8.78e-07	14306	0.00176156	25.2419	class Clostridia id.1859	ebi-a-GCST90016913		0.1221	0.0896	0.1733	104247	3011	finn-b-O15_MEMBR_PREMAT_RUPT
99	rs11250875	T	C	0.06075	0.0130939	4.83e-06	14306	0.00150239	21.5226	class Coriobacteriia id.809	ebi-a-GCST90016914		-0.0062	0.0326	0.8495	104247	3011	finn-b-O15_MEMBR_PREMAT_RUPT
100	rs11656361	A	C	0.0773006	0.017553	8.02e-06	14306	0.00135381	19.3911	class Coriobacteriia id.809	ebi-a-GCST90016914		-0.0091	0.0347	0.793999	104247	3011	finn-b-O15_MEMBR_PREMAT_RUPT
101	rs12974142	G	A	0.0789796	0.0177205	8.51e-06	14306	0.00138662	19.8617	class Coriobacteriia id.809	ebi-a-GCST90016914		0.0194	0.0523	0.7103	104247	3011	finn-b-O15_MEMBR_PREMAT_RUPT
102	rs13307134	T	C	-0.0565686	0.0126265	7.8e-06	14306	0.00140106	20.0689	class Coriobacteriia id.809	ebi-a-GCST90016914		-0.0356	0.0357	0.3191	104247	3011	finn-b-O15_MEMBR_PREMAT_RUPT
103	rs1397793	A	G	0.0498855	0.0112446	9.77e-06	14306	0.00137387	19.6789	class Coriobacteriia id.809	ebi-a-GCST90016914		0.0291	0.0295	0.3235	104247	3011	finn-b-O15_MEMBR_PREMAT_RUPT
104	rs1816223	G	A	0.0586265	0.0129006	4.84e-06	14306	0.00144153	20.6494	class Coriobacteriia id.809	ebi-a-GCST90016914		-0.0262	0.0335	0.4341	104247	3011	finn-b-O15_MEMBR_PREMAT_RUPT
105	rs240104	T	C	-0.0603429	0.0126849	1.52e-06	14306	0.00157933	22.6265	class Coriobacteriia id.809	ebi-a-GCST90016914		0.006	0.0298	0.8402	104247	3011	finn-b-O15_MEMBR_PREMAT_RUPT
106	rs2442778	A	G	0.116408	0.0258545	9.03e-06	14306	0.00141501	20.269	class Coriobacteriia id.809	ebi-a-GCST90016914		0.0027	0.0601	0.964	104247	3011	finn-b-O15_MEMBR_PREMAT_RUPT
107	rs3025411	A	G	0.0926543	0.0209468	8.27e-06	14306	0.00136579	19.563	class Coriobacteriia id.809	ebi-a-GCST90016914		-0.039	0.0437	0.3727	104247	3011	finn-b-O15_MEMBR_PREMAT_RUPT
108	rs34739816	G	T	0.0965017	0.0207666	3.88e-06	14306	0.00150718	21.5913	class Coriobacteriia id.809	ebi-a-GCST90016914		0.1567	0.0576	0.00656493	104247	3011	finn-b-O15_MEMBR_PREMAT_RUPT
109	rs62448869	T	A	-0.0486059	0.0108982	7.87e-06	14306	0.0013885	19.8888	class Coriobacteriia id.809	ebi-a-GCST90016914		-0.0244	0.0269	0.3644	104247	3011	finn-b-O15_MEMBR_PREMAT_RUPT
110	rs67561917	A	G	-0.0714367	0.0154113	5.39e-06	14306	0.00149967	21.4834	class Coriobacteriia id.809	ebi-a-GCST90016914		0.0138	0.0346	0.6901	104247	3011	finn-b-O15_MEMBR_PREMAT_RUPT
111	rs719099	A	G	0.0778402	0.0155815	5.43e-07	14306	0.00174146	24.9533	class Coriobacteriia id.809	ebi-a-GCST90016914		0.1306	0.045	0.00369803	104247	3011	finn-b-O15_MEMBR_PREMAT_RUPT
112	rs76779974	C	G	0.0774888	0.0171877	5.63e-06	14306	0.00141876	20.3227	class Coriobacteriia id.809	ebi-a-GCST90016914		-0.022	0.0457	0.6297	104247	3011	finn-b-O15_MEMBR_PREMAT_RUPT
113	rs80046645	C	G	0.25584	0.0561995	4.66e-06	14306	0.00144652	20.721	class Coriobacteriia id.809	ebi-a-GCST90016914		-0.1051	0.0698	0.1325	104247	3011	finn-b-O15_MEMBR_PREMAT_RUPT
114	rs8010111	A	G	0.103377	0.0229286	6.9e-06	14306	0.00141892	20.3251	class Coriobacteriia id.809	ebi-a-GCST90016914		-0.0354	0.0489	0.469	104247	3011	finn-b-O15_MEMBR_PREMAT_RUPT
115	rs1035691	G	A	0.055176	0.0121602	9.65e-06	14306	0.00143706	20.5854	class Deltaproteobacteria id.3087	ebi-a-GCST90016915		0.018	0.0274	0.5107	104247	3011	finn-b-O15_MEMBR_PREMAT_RUPT
116	rs112381107	C	T	0.206594	0.0456908	4.63e-06	14306	0.00142705	20.4417	class Deltaproteobacteria id.3087	ebi-a-GCST90016915		0.0081	0.0564	0.8859	104247	3011	finn-b-O15_MEMBR_PREMAT_RUPT
117	rs11599763	C	T	0.0544219	0.0117397	3.94e-06	14306	0.0014999	21.4868	class Deltaproteobacteria id.3087	ebi-a-GCST90016915		-0.0587	0.0274	0.03234	104247	3011	finn-b-O15_MEMBR_PREMAT_RUPT
118	rs16851319	G	C	-0.0705516	0.0150849	5.68e-06	14306	0.00152668	21.871	class Deltaproteobacteria id.3087	ebi-a-GCST90016915		-0.0576	0.0355	0.1047	104247	3011	finn-b-O15_MEMBR_PREMAT_RUPT
119	rs17084793	G	A	-0.0710762	0.015953	5.69e-06	14306	0.00138562	19.8474	class Deltaproteobacteria id.3087	ebi-a-GCST90016915		-0.013	0.038	0.733	104247	3011	finn-b-O15_MEMBR_PREMAT_RUPT
120	rs17791387	A	G	-0.0735881	0.0154246	1.6e-06	14306	0.00158847	22.7576	class Deltaproteobacteria id.3087	ebi-a-GCST90016915		0.0681	0.0454	0.1338	104247	3011	finn-b-O15_MEMBR_PREMAT_RUPT
121	rs2692012	G	A	-0.110335	0.0253336	3.14e-06	14306	0.00132416	18.9658	class Deltaproteobacteria id.3087	ebi-a-GCST90016915		-0.0748	0.0592	0.2065	104247	3011	finn-b-O15_MEMBR_PREMAT_RUPT
122	rs2838334	G	A	0.0561722	0.0124124	5.45e-06	14306	0.00142953	20.4772	class Deltaproteobacteria id.3087	ebi-a-GCST90016915		0.0244	0.0281	0.3851	104247	3011	finn-b-O15_MEMBR_PREMAT_RUPT
123	rs3935584	C	T	-0.0523484	0.011566	7.5e-06	14306	0.00142988	20.4823	class Deltaproteobacteria id.3087	ebi-a-GCST90016915		-0.0006	0.0269	0.9815	104247	3011	finn-b-O15_MEMBR_PREMAT_RUPT
124	rs4506934	C	T	-0.0936514	0.02012	3.59e-06	14306	0.00151216	21.6627	class Deltaproteobacteria id.3087	ebi-a-GCST90016915		-0.0247	0.0418	0.5538	104247	3011	finn-b-O15_MEMBR_PREMAT_RUPT
125	rs55744759	A	G	-0.0779693	0.0170738	7.31e-06	14306	0.00145558	20.851	class Deltaproteobacteria id.3087	ebi-a-GCST90016915		-0.0673	0.0424	0.1124	104247	3011	finn-b-O15_MEMBR_PREMAT_RUPT
126	rs6058181	C	T	0.0825716	0.0165958	3.4e-07	14306	0.00172741	24.7517	class Deltaproteobacteria id.3087	ebi-a-GCST90016915		0.0507	0.0362	0.161	104247	3011	finn-b-O15_MEMBR_PREMAT_RUPT
127	rs62020470	A	G	-0.0585411	0.0129358	4.85e-06	14306	0.00142954	20.4774	class Deltaproteobacteria id.3087	ebi-a-GCST90016915		0.0527	0.0349	0.1312	104247	3011	finn-b-O15_MEMBR_PREMAT_RUPT
128	rs9928243	C	A	-0.0538457	0.0117718	5.02e-06	14306	0.00146037	20.9197	class Deltaproteobacteria id.3087	ebi-a-GCST90016915		-0.0215	0.0267	0.4207	104247	3011	finn-b-O15_MEMBR_PREMAT_RUPT
129	rs1074800	G	A	-0.0492438	0.010887	6.15e-06	14306	0.00142806	20.4562	class Erysipelotrichia id.2147	ebi-a-GCST90016916		-0.0266	0.027	0.3245	104247	3011	finn-b-O15_MEMBR_PREMAT_RUPT
130	rs10781552	C	T	-0.0552212	0.0116074	2.33e-06	14306	0.00157956	22.6298	class Erysipelotrichia id.2147	ebi-a-GCST90016916		-0.0056	0.0298	0.8499	104247	3011	finn-b-O15_MEMBR_PREMAT_RUPT
131	rs17530232	A	G	0.10305	0.0224648	2.79e-06	14306	0.0014687	21.0392	class Erysipelotrichia id.2147	ebi-a-GCST90016916		-0.1396	0.06	0.0200701	104247	3011	finn-b-O15_MEMBR_PREMAT_RUPT
132	rs1884466	C	T	-0.0475363	0.0106939	9.53e-06	14306	0.00137931	19.7569	class Erysipelotrichia id.2147	ebi-a-GCST90016916		0.0286	0.0269	0.2879	104247	3011	finn-b-O15_MEMBR_PREMAT_RUPT
133	rs2300774	A	G	-0.0524152	0.0106784	8.95e-07	14306	0.00168133	24.0903	class Erysipelotrichia id.2147	ebi-a-GCST90016916		-0.0193	0.0268	0.4713	104247	3011	finn-b-O15_MEMBR_PREMAT_RUPT
134	rs290833	T	G	-0.0497374	0.0111376	8.03e-06	14306	0.00139207	19.9399	class Erysipelotrichia id.2147	ebi-a-GCST90016916		-0.0057	0.0269	0.8322	104247	3011	finn-b-O15_MEMBR_PREMAT_RUPT
135	rs35161940	T	C	-0.0806041	0.0167641	1.85e-06	14306	0.00161337	23.115	class Erysipelotrichia id.2147	ebi-a-GCST90016916		-0.032	0.0434	0.4607	104247	3011	finn-b-O15_MEMBR_PREMAT_RUPT
136	rs4078432	T	C	0.0608929	0.0133764	4.23e-06	14306	0.00144647	20.7202	class Erysipelotrichia id.2147	ebi-a-GCST90016916		-0.027	0.0355	0.4469	104247	3011	finn-b-O15_MEMBR_PREMAT_RUPT
137	rs56970041	T	G	0.0724145	0.0164471	5.4e-06	14306	0.00135321	19.3826	class Erysipelotrichia id.2147	ebi-a-GCST90016916		-0.0795	0.0562	0.1568	104247	3011	finn-b-O15_MEMBR_PREMAT_RUPT
138	rs62504403	C	T	0.0681159	0.0127883	1.12e-07	14306	0.00197921	28.3668	class Erysipelotrichia id.2147	ebi-a-GCST90016916		-0.0058	0.0339	0.8639	104247	3011	finn-b-O15_MEMBR_PREMAT_RUPT
139	rs7234058	T	C	-0.0945759	0.0194091	9.12e-07	14306	0.00165696	23.7405	class Erysipelotrichia id.2147	ebi-a-GCST90016916		0.0493	0.0465	0.2888	104247	3011	finn-b-O15_MEMBR_PREMAT_RUPT
140	rs7826267	G	T	0.0839071	0.0199131	9.28e-06	14306	0.00123955	17.7525	class Erysipelotrichia id.2147	ebi-a-GCST90016916		-0.0003	0.0543	0.9957	104247	3011	finn-b-O15_MEMBR_PREMAT_RUPT
141	rs8003149	C	T	0.0538798	0.0116888	4.08e-06	14306	0.00148303	21.2447	class Erysipelotrichia id.2147	ebi-a-GCST90016916		-0.0281	0.0284	0.322	104247	3011	finn-b-O15_MEMBR_PREMAT_RUPT
142	rs11181912	G	A	-0.0579153	0.0118796	9.95e-07	14306	0.00165861	23.7641	class Gammaproteobacteria id.3303	ebi-a-GCST90016917		-0.0023	0.0286	0.9352	104247	3011	finn-b-O15_MEMBR_PREMAT_RUPT
143	rs12404135	A	G	-0.0788843	0.0172415	8.89e-06	14306	0.00146109	20.9301	class Gammaproteobacteria id.3303	ebi-a-GCST90016917		-0.0051	0.05	0.9195	104247	3011	finn-b-O15_MEMBR_PREMAT_RUPT
144	rs6469506	T	A	0.0541424	0.0116333	3.29e-06	14306	0.0015118	21.6575	class Gammaproteobacteria id.3303	ebi-a-GCST90016917		0.0535	0.0284	0.0591602	104247	3011	finn-b-O15_MEMBR_PREMAT_RUPT
145	rs6706173	A	C	0.074251	0.0146392	1.99e-07	14306	0.00179503	25.7223	class Gammaproteobacteria id.3303	ebi-a-GCST90016917		-0.0703	0.0389	0.0707701	104247	3011	finn-b-O15_MEMBR_PREMAT_RUPT
146	rs75101789	C	T	0.0729012	0.0163003	8.79e-06	14306	0.00139622	19.9994	class Gammaproteobacteria id.3303	ebi-a-GCST90016917		-0.0193	0.0477	0.6859	104247	3011	finn-b-O15_MEMBR_PREMAT_RUPT
147	rs79795896	A	G	-0.15921	0.0351373	7.92e-06	14306	0.00143305	20.5278	class Gammaproteobacteria id.3303	ebi-a-GCST90016917		0.0011	0.0636	0.9864	104247	3011	finn-b-O15_MEMBR_PREMAT_RUPT
148	rs9494710	C	T	-0.0549673	0.0120924	4.55e-06	14306	0.00144224	20.6597	class Gammaproteobacteria id.3303	ebi-a-GCST90016917		0.0403	0.0286	0.158	104247	3011	finn-b-O15_MEMBR_PREMAT_RUPT
149	rs9973122	A	T	-0.0740614	0.0162596	6.77e-06	14306	0.00144816	20.7445	class Gammaproteobacteria id.3303	ebi-a-GCST90016917		-0.0229	0.0488	0.6386	104247	3011	finn-b-O15_MEMBR_PREMAT_RUPT
150	rs1002941	A	G	-0.105025	0.0233484	8.15e-06	14306	0.00141234	20.2307	class Lentisphaeria id.2250	ebi-a-GCST90016918		0.016	0.0311	0.6056	104247	3011	finn-b-O15_MEMBR_PREMAT_RUPT
151	rs11770843	C	T	0.109431	0.0234879	1.91e-06	14306	0.00151501	21.7036	class Lentisphaeria id.2250	ebi-a-GCST90016918		-0.0198	0.0286	0.4872	104247	3011	finn-b-O15_MEMBR_PREMAT_RUPT
152	rs17114848	G	A	0.152377	0.0324332	4.06e-06	14306	0.00154053	22.0698	class Lentisphaeria id.2250	ebi-a-GCST90016918		-0.0352	0.0449	0.4337	104247	3011	finn-b-O15_MEMBR_PREMAT_RUPT
153	rs2031282	A	G	0.122368	0.0270329	4.38e-06	14306	0.00143025	20.4875	class Lentisphaeria id.2250	ebi-a-GCST90016918		-0.0347	0.0355	0.3287	104247	3011	finn-b-O15_MEMBR_PREMAT_RUPT
154	rs2731834	G	C	-0.109438	0.023693	4.24e-06	14306	0.00148912	21.3322	class Lentisphaeria id.2250	ebi-a-GCST90016918		-0.0217	0.0313	0.4881	104247	3011	finn-b-O15_MEMBR_PREMAT_RUPT
155	rs2825714	A	G	-0.13741	0.0289246	1.72e-06	14306	0.00157507	22.5653	class Lentisphaeria id.2250	ebi-a-GCST90016918		-0.0601	0.0359	0.0941304	104247	3011	finn-b-O15_MEMBR_PREMAT_RUPT
156	rs62570196	C	T	-0.21635	0.0439866	1.08e-06	14306	0.00168819	24.1887	class Lentisphaeria id.2250	ebi-a-GCST90016918		0.1705	0.0669	0.0107701	104247	3011	finn-b-O15_MEMBR_PREMAT_RUPT
157	rs72640280	A	G	0.220207	0.0486196	5.18e-06	14306	0.00143186	20.5106	class Lentisphaeria id.2250	ebi-a-GCST90016918		0.065	0.0587	0.2684	104247	3011	finn-b-O15_MEMBR_PREMAT_RUPT
158	rs73113483	T	A	-0.131217	0.0288713	8.66e-06	14306	0.00144179	20.6532	class Lentisphaeria id.2250	ebi-a-GCST90016918		-0.0272	0.0409	0.506001	104247	3011	finn-b-O15_MEMBR_PREMAT_RUPT
159	rs77599476	A	G	0.230292	0.0480168	1.86e-06	14306	0.0016053	22.9991	class Lentisphaeria id.2250	ebi-a-GCST90016918		0.0983	0.0582	0.0909599	104247	3011	finn-b-O15_MEMBR_PREMAT_RUPT
160	rs10148250	A	G	-0.0861928	0.0193381	8.67e-06	14306	0.00138674	19.8634	class Melainabacteria id.1589	ebi-a-GCST90016919		-0.0475	0.0282	0.0923996	104247	3011	finn-b-O15_MEMBR_PREMAT_RUPT
161	rs10738747	A	G	-0.0814624	0.0184409	9.96e-06	14306	0.0013622	19.5114	class Melainabacteria id.1589	ebi-a-GCST90016919		-0.045	0.0269	0.0947109	104247	3011	finn-b-O15_MEMBR_PREMAT_RUPT
162	rs11150282	T	C	0.0989487	0.0196972	6.03e-07	14306	0.00176087	25.2319	class Melainabacteria id.1589	ebi-a-GCST90016919		-0.0527	0.0279	0.0587503	104247	3011	finn-b-O15_MEMBR_PREMAT_RUPT
163	rs113884518	T	C	-0.205352	0.0454982	8.06e-06	14306	0.00142191	20.368	class Melainabacteria id.1589	ebi-a-GCST90016919		-0.0164	0.0865	0.8497	104247	3011	finn-b-O15_MEMBR_PREMAT_RUPT
164	rs1221147	A	T	-0.123968	0.0278958	7.11e-06	14306	0.00137856	19.7461	class Melainabacteria id.1589	ebi-a-GCST90016919		-0.0397	0.0374	0.2878	104247	3011	finn-b-O15_MEMBR_PREMAT_RUPT
165	rs16851659	G	C	-0.0896103	0.0186432	1.27e-06	14306	0.00161234	23.1001	class Melainabacteria id.1589	ebi-a-GCST90016919		0.0003	0.0282	0.9924	104247	3011	finn-b-O15_MEMBR_PREMAT_RUPT
166	rs28678345	T	C	0.214848	0.0470878	6.69e-06	14306	0.0014531	20.8154	class Melainabacteria id.1589	ebi-a-GCST90016919		-0.001	0.0625	0.9877	104247	3011	finn-b-O15_MEMBR_PREMAT_RUPT
167	rs367480	A	G	0.083758	0.0185796	8.2e-06	14306	0.00141855	20.3198	class Melainabacteria id.1589	ebi-a-GCST90016919		0.0155	0.0279	0.578901	104247	3011	finn-b-O15_MEMBR_PREMAT_RUPT
168	rs4129395	G	A	0.0896187	0.0185106	1.48e-06	14306	0.00163579	23.4367	class Melainabacteria id.1589	ebi-a-GCST90016919		0.0235	0.0267	0.3787	104247	3011	finn-b-O15_MEMBR_PREMAT_RUPT
169	rs73074665	A	T	0.166216	0.0355728	2.87e-06	14306	0.0015238	21.8298	class Melainabacteria id.1589	ebi-a-GCST90016919		-0.0198	0.0545	0.716	104247	3011	finn-b-O15_MEMBR_PREMAT_RUPT
170	rs789069	A	C	-0.103539	0.0234287	6.85e-06	14306	0.00136333	19.5277	class Melainabacteria id.1589	ebi-a-GCST90016919		0.0583	0.0382	0.1267	104247	3011	finn-b-O15_MEMBR_PREMAT_RUPT
171	rs79790072	T	C	0.226722	0.0487841	3.29e-06	14306	0.0015075	21.5958	class Melainabacteria id.1589	ebi-a-GCST90016919		-0.0516	0.0778	0.5072	104247	3011	finn-b-O15_MEMBR_PREMAT_RUPT
172	rs9864379	T	C	-0.159735	0.0292553	5.36e-08	14306	0.00207955	29.8078	class Melainabacteria id.1589	ebi-a-GCST90016919		0.0103	0.0378	0.7845	104247	3011	finn-b-O15_MEMBR_PREMAT_RUPT
173	rs10202904	G	T	0.121754	0.0235357	3.01e-07	14306	0.00186716	26.7579	class Methanobacteria id.119	ebi-a-GCST90016920		0.0096	0.0272	0.724201	104247	3011	finn-b-O15_MEMBR_PREMAT_RUPT
174	rs10424197	A	G	0.111274	0.0247517	9.28e-06	14306	0.00141074	20.2077	class Methanobacteria id.119	ebi-a-GCST90016920		-0.0125	0.0308	0.6853	104247	3011	finn-b-O15_MEMBR_PREMAT_RUPT
175	rs11018665	A	T	0.111465	0.0250516	6.52e-06	14306	0.00138193	19.7945	class Methanobacteria id.119	ebi-a-GCST90016920		0.0359	0.0312	0.2497	104247	3011	finn-b-O15_MEMBR_PREMAT_RUPT
176	rs12825290	C	G	-0.216781	0.0493496	6.08e-06	14306	0.00134701	19.2937	class Methanobacteria id.119	ebi-a-GCST90016920		-0.0608	0.0555	0.2731	104247	3011	finn-b-O15_MEMBR_PREMAT_RUPT
177	rs4257531	G	A	0.164498	0.0364959	7.44e-06	14306	0.00141807	20.3129	class Methanobacteria id.119	ebi-a-GCST90016920		-0.0485	0.0438	0.2683	104247	3011	finn-b-O15_MEMBR_PREMAT_RUPT
178	rs56131665	G	A	0.178661	0.039298	6.18e-06	14306	0.00144269	20.6661	class Methanobacteria id.119	ebi-a-GCST90016920		-0.0075	0.0428	0.8602	104247	3011	finn-b-O15_MEMBR_PREMAT_RUPT
179	rs6508769	C	T	-0.153519	0.0344519	8.23e-06	14306	0.00138605	19.8535	class Methanobacteria id.119	ebi-a-GCST90016920		-0.0004	0.0378	0.991	104247	3011	finn-b-O15_MEMBR_PREMAT_RUPT
180	rs6776814	T	C	-0.199566	0.0411825	1.63e-06	14306	0.00163877	23.4794	class Methanobacteria id.119	ebi-a-GCST90016920		-0.1228	0.0937	0.1899	104247	3011	finn-b-O15_MEMBR_PREMAT_RUPT
181	rs73068003	G	T	-0.15814	0.0351803	8.45e-06	14306	0.00141044	20.2034	class Methanobacteria id.119	ebi-a-GCST90016920		-0.0371	0.0452	0.4123	104247	3011	finn-b-O15_MEMBR_PREMAT_RUPT
182	rs73457410	A	G	0.21534	0.0436695	1.41e-06	14306	0.00169683	24.3126	class Methanobacteria id.119	ebi-a-GCST90016920		-0.1232	0.0547	0.0243299	104247	3011	finn-b-O15_MEMBR_PREMAT_RUPT
183	rs75208022	C	T	-0.227245	0.048763	5.92e-06	14306	0.00151576	21.7144	class Methanobacteria id.119	ebi-a-GCST90016920		0.0352	0.0461	0.4452	104247	3011	finn-b-O15_MEMBR_PREMAT_RUPT
184	rs894996	C	A	0.216999	0.0449076	1.88e-06	14306	0.00162948	23.3461	class Methanobacteria id.119	ebi-a-GCST90016920		-0.0565	0.0525	0.2826	104247	3011	finn-b-O15_MEMBR_PREMAT_RUPT
185	rs10108398	G	A	0.0769142	0.0153953	1.09e-06	14306	0.00174165	24.9561	class Mollicutes id.3920	ebi-a-GCST90016921		-0.0013	0.0299	0.966	104247	3011	finn-b-O15_MEMBR_PREMAT_RUPT
186	rs11890098	A	G	0.074438	0.0153389	9.57e-07	14306	0.0016435	23.5473	class Mollicutes id.3920	ebi-a-GCST90016921		0.006	0.0297	0.8401	104247	3011	finn-b-O15_MEMBR_PREMAT_RUPT
187	rs12566890	T	G	-0.101147	0.0230978	3.65e-06	14306	0.00133864	19.1736	class Mollicutes id.3920	ebi-a-GCST90016921		0.0298	0.04	0.4553	104247	3011	finn-b-O15_MEMBR_PREMAT_RUPT
188	rs17214486	C	A	0.06099	0.0135623	6.61e-06	14306	0.00141162	20.2204	class Mollicutes id.3920	ebi-a-GCST90016921		-0.0498	0.0287	0.0831898	104247	3011	finn-b-O15_MEMBR_PREMAT_RUPT
189	rs2464826	A	C	0.0944239	0.0211806	8.39e-06	14306	0.00138729	19.8713	class Mollicutes id.3920	ebi-a-GCST90016921		-0.0008	0.0427	0.985	104247	3011	finn-b-O15_MEMBR_PREMAT_RUPT
190	rs28537087	G	A	0.0820873	0.0188312	8.07e-06	14306	0.00132648	18.9992	class Mollicutes id.3920	ebi-a-GCST90016921		-0.0295	0.0311	0.344	104247	3011	finn-b-O15_MEMBR_PREMAT_RUPT
191	rs3768491	G	A	0.0681052	0.0149061	4.23e-06	14306	0.00145707	20.8724	class Mollicutes id.3920	ebi-a-GCST90016921		-0.0342	0.0295	0.2458	104247	3011	finn-b-O15_MEMBR_PREMAT_RUPT
192	rs4885016	C	T	0.0819606	0.0181628	7.27e-06	14306	0.00142137	20.3603	class Mollicutes id.3920	ebi-a-GCST90016921		-0.0667	0.039	0.0873695	104247	3011	finn-b-O15_MEMBR_PREMAT_RUPT
193	rs6043847	T	C	-0.114937	0.0248606	4.55e-06	14306	0.00149187	21.3715	class Mollicutes id.3920	ebi-a-GCST90016921		-0.0403	0.0566	0.476	104247	3011	finn-b-O15_MEMBR_PREMAT_RUPT
194	rs72901605	T	C	-0.0841852	0.0178119	3.26e-06	14306	0.00155903	22.3352	class Mollicutes id.3920	ebi-a-GCST90016921		0.0327	0.0422	0.4389	104247	3011	finn-b-O15_MEMBR_PREMAT_RUPT
195	rs74603314	T	C	0.221639	0.0462918	1.56e-06	14306	0.00159982	22.9205	class Mollicutes id.3920	ebi-a-GCST90016921		-0.0368	0.0678	0.5874	104247	3011	finn-b-O15_MEMBR_PREMAT_RUPT
196	rs78169027	A	G	-0.108283	0.0237289	5.88e-06	14306	0.0014535	20.8211	class Mollicutes id.3920	ebi-a-GCST90016921		0.0468	0.0571	0.4123	104247	3011	finn-b-O15_MEMBR_PREMAT_RUPT
197	rs1135612	G	A	0.0529785	0.0119177	9.26e-06	14306	0.00137942	19.7585	class Negativicutes id.2164	ebi-a-GCST90016922		0.065	0.0329	0.0480297	104247	3011	finn-b-O15_MEMBR_PREMAT_RUPT
198	rs13086907	G	A	0.0625312	0.0131735	1.95e-06	14306	0.0015725	22.5284	class Negativicutes id.2164	ebi-a-GCST90016922		0.0751	0.0322	0.01963	104247	3011	finn-b-O15_MEMBR_PREMAT_RUPT
199	rs1447205	C	G	0.0502053	0.0108382	2.93e-06	14306	0.00149767	21.4548	class Negativicutes id.2164	ebi-a-GCST90016922		-0.05	0.0278	0.0721905	104247	3011	finn-b-O15_MEMBR_PREMAT_RUPT
200	rs1643968	T	C	-0.0565284	0.0112298	4.15e-07	14306	0.00176808	25.3355	class Negativicutes id.2164	ebi-a-GCST90016922		0.0215	0.0278	0.4388	104247	3011	finn-b-O15_MEMBR_PREMAT_RUPT
201	rs1649999	A	G	0.0748989	0.0166458	7.58e-06	14306	0.00141322	20.2433	class Negativicutes id.2164	ebi-a-GCST90016922		-0.032	0.0452	0.4787	104247	3011	finn-b-O15_MEMBR_PREMAT_RUPT
202	rs2834062	A	G	0.0489057	0.0108842	8.44e-06	14306	0.00140927	20.1867	class Negativicutes id.2164	ebi-a-GCST90016922		-0.0202	0.0294	0.491501	104247	3011	finn-b-O15_MEMBR_PREMAT_RUPT
203	rs4463806	C	T	0.0543966	0.0129365	7.81e-06	14306	0.0012344	17.6787	class Negativicutes id.2164	ebi-a-GCST90016922		-0.0208	0.034	0.5412	104247	3011	finn-b-O15_MEMBR_PREMAT_RUPT
204	rs4722181	T	G	0.0501306	0.0105798	2e-06	14306	0.00156694	22.4486	class Negativicutes id.2164	ebi-a-GCST90016922		-0.0594	0.0267	0.0263099	104247	3011	finn-b-O15_MEMBR_PREMAT_RUPT
205	rs60274479	T	C	-0.0659623	0.0134137	1.16e-06	14306	0.0016875	24.1787	class Negativicutes id.2164	ebi-a-GCST90016922		0.0056	0.0338	0.8693	104247	3011	finn-b-O15_MEMBR_PREMAT_RUPT
206	rs61249479	A	C	0.0777075	0.0168628	2.95e-06	14306	0.00148219	21.2327	class Negativicutes id.2164	ebi-a-GCST90016922		-0.0471	0.037	0.2039	104247	3011	finn-b-O15_MEMBR_PREMAT_RUPT
207	rs71405394	G	A	-0.114178	0.02405	2.17e-06	14306	0.00157302	22.5359	class Negativicutes id.2164	ebi-a-GCST90016922		0.0259	0.0526	0.621901	104247	3011	finn-b-O15_MEMBR_PREMAT_RUPT
208	rs73232831	G	A	-0.151829	0.0314932	1.87e-06	14306	0.00162201	23.2389	class Negativicutes id.2164	ebi-a-GCST90016922		0.0549	0.0732	0.453	104247	3011	finn-b-O15_MEMBR_PREMAT_RUPT
209	rs9423647	G	A	0.047817	0.0105282	6.06e-06	14306	0.00143983	20.6251	class Negativicutes id.2164	ebi-a-GCST90016922		-0.053	0.0269	0.0486105	104247	3011	finn-b-O15_MEMBR_PREMAT_RUPT
210	rs11184341	C	G	-0.0655342	0.0142231	4.13e-06	14306	0.00148179	21.2269	class Verrucomicrobiae id.4029	ebi-a-GCST90016923		-0.0437	0.03	0.1448	104247	3011	finn-b-O15_MEMBR_PREMAT_RUPT
211	rs111862613	T	C	0.090699	0.0196746	3.74e-06	14306	0.0014833	21.2487	class Verrucomicrobiae id.4029	ebi-a-GCST90016923		-0.0174	0.0357	0.6261	104247	3011	finn-b-O15_MEMBR_PREMAT_RUPT
212	rs117107102	A	G	0.204683	0.0431572	2.92e-06	14306	0.00156984	22.4904	class Verrucomicrobiae id.4029	ebi-a-GCST90016923		0.0297	0.0632	0.6387	104247	3011	finn-b-O15_MEMBR_PREMAT_RUPT
213	rs11729256	T	C	0.0749798	0.0150177	6.73e-07	14306	0.00173943	24.9242	class Verrucomicrobiae id.4029	ebi-a-GCST90016923		-0.0299	0.0356	0.4004	104247	3011	finn-b-O15_MEMBR_PREMAT_RUPT
214	rs12908520	G	A	0.0618926	0.0130946	2.17e-06	14306	0.00155918	22.3374	class Verrucomicrobiae id.4029	ebi-a-GCST90016923		-0.0076	0.027	0.7772	104247	3011	finn-b-O15_MEMBR_PREMAT_RUPT
215	rs2602429	T	C	-0.0746844	0.0156194	2.58e-06	14306	0.00159558	22.8597	class Verrucomicrobiae id.4029	ebi-a-GCST90016923		0.0392	0.0304	0.1975	104247	3011	finn-b-O15_MEMBR_PREMAT_RUPT
216	rs4242783	A	G	-0.0689292	0.0147693	2.64e-06	14306	0.00152022	21.7784	class Verrucomicrobiae id.4029	ebi-a-GCST90016923		-0.0041	0.0297	0.8904	104247	3011	finn-b-O15_MEMBR_PREMAT_RUPT
217	rs4936098	G	A	-0.0648843	0.0135928	1.12e-06	14306	0.0015902	22.7825	class Verrucomicrobiae id.4029	ebi-a-GCST90016923		-0.0046	0.028	0.8688	104247	3011	finn-b-O15_MEMBR_PREMAT_RUPT
218	rs61779207	G	A	-0.0758309	0.0167762	6.72e-06	14306	0.00142616	20.4289	class Verrucomicrobiae id.4029	ebi-a-GCST90016923		0.0249	0.0321	0.4381	104247	3011	finn-b-O15_MEMBR_PREMAT_RUPT
219	rs74542928	T	C	0.112164	0.0236422	1.63e-06	14306	0.00157083	22.5046	class Verrucomicrobiae id.4029	ebi-a-GCST90016923		-0.0041	0.0626	0.9479	104247	3011	finn-b-O15_MEMBR_PREMAT_RUPT
220	rs9349825	A	G	-0.0704036	0.0147128	2.54e-06	14306	0.00159804	22.8949	class Verrucomicrobiae id.4029	ebi-a-GCST90016923		0.0263	0.0341	0.4409	104247	3011	finn-b-O15_MEMBR_PREMAT_RUPT
221	rs941682	G	A	-0.0631436	0.0143767	9.61e-06	14306	0.00134659	19.2877	class Verrucomicrobiae id.4029	ebi-a-GCST90016923		-0.0397	0.0299	0.1843	104247	3011	finn-b-O15_MEMBR_PREMAT_RUPT
222	rs262812	T	C	-0.065675	0.0142257	3.25e-06	14306	0.00148761	21.3104	family Acidaminococcaceae id.2166	ebi-a-GCST90016924		0.0152	0.0293	0.604901	104247	3011	finn-b-O15_MEMBR_PREMAT_RUPT
223	rs2933324	G	A	0.0662557	0.0140257	2.24e-06	14306	0.00155741	22.3119	family Acidaminococcaceae id.2166	ebi-a-GCST90016924		-0.0084	0.0318	0.7922	104247	3011	finn-b-O15_MEMBR_PREMAT_RUPT
224	rs45497800	T	C	-0.117863	0.0257351	5.86e-06	14306	0.00146403	20.9721	family Acidaminococcaceae id.2166	ebi-a-GCST90016924		0.0235	0.0382	0.5389	104247	3011	finn-b-O15_MEMBR_PREMAT_RUPT
225	rs6427992	C	G	0.0595857	0.01296	4.24e-06	14306	0.00147542	21.1355	family Acidaminococcaceae id.2166	ebi-a-GCST90016924		-0.0225	0.0276	0.4153	104247	3011	finn-b-O15_MEMBR_PREMAT_RUPT
226	rs6589457	G	A	-0.165911	0.0349516	2.32e-06	14306	0.00157259	22.5297	family Acidaminococcaceae id.2166	ebi-a-GCST90016924		-0.0819	0.0614	0.1827	104247	3011	finn-b-O15_MEMBR_PREMAT_RUPT
227	rs6923842	T	C	-0.0796106	0.0169192	2.21e-06	14306	0.00154523	22.1371	family Acidaminococcaceae id.2166	ebi-a-GCST90016924		0.0269	0.0423	0.524901	104247	3011	finn-b-O15_MEMBR_PREMAT_RUPT
228	rs74540770	G	A	-0.108969	0.0243533	7.09e-06	14306	0.00139754	20.0184	family Acidaminococcaceae id.2166	ebi-a-GCST90016924		0.0312	0.0494	0.528	104247	3011	finn-b-O15_MEMBR_PREMAT_RUPT
229	rs78702810	T	C	-0.143755	0.0323244	9.16e-06	14306	0.0013806	19.7754	family Acidaminococcaceae id.2166	ebi-a-GCST90016924		0.086	0.0441	0.0512602	104247	3011	finn-b-O15_MEMBR_PREMAT_RUPT
230	rs2889192	T	G	-0.0887537	0.0195009	3.64e-06	14306	0.00144583	20.7111	family Actinomycetaceae id.421	ebi-a-GCST90016925		-0.0682	0.0375	0.0684999	104247	3011	finn-b-O15_MEMBR_PREMAT_RUPT
231	rs34583783	G	T	0.123756	0.026427	5.48e-06	14306	0.00153057	21.9268	family Actinomycetaceae id.421	ebi-a-GCST90016925		-0.0012	0.0563	0.9832	104247	3011	finn-b-O15_MEMBR_PREMAT_RUPT
232	rs35011108	A	G	0.241826	0.0503796	1.83e-06	14306	0.00160798	23.0375	family Actinomycetaceae id.421	ebi-a-GCST90016925		-0.1352	0.054	0.01224	104247	3011	finn-b-O15_MEMBR_PREMAT_RUPT
233	rs4073240	G	A	0.0747546	0.0164684	6.05e-06	14306	0.00143823	20.6021	family Actinomycetaceae id.421	ebi-a-GCST90016925		-0.0375	0.0275	0.1728	104247	3011	finn-b-O15_MEMBR_PREMAT_RUPT
234	rs58484246	T	C	0.0761407	0.0169007	6.12e-06	14306	0.00141674	20.2938	family Actinomycetaceae id.421	ebi-a-GCST90016925		-0.03	0.028	0.2838	104247	3011	finn-b-O15_MEMBR_PREMAT_RUPT
235	rs112135816	T	G	-0.0775052	0.0171554	5.28e-06	14306	0.0014247	20.4079	family Alcaligenaceae id.2875	ebi-a-GCST90016926		0.0493	0.0557	0.3766	104247	3011	finn-b-O15_MEMBR_PREMAT_RUPT
236	rs112159068	A	T	0.131484	0.0281089	3.56e-06	14306	0.00152713	21.8775	family Alcaligenaceae id.2875	ebi-a-GCST90016926		0.1122	0.0803	0.1621	104247	3011	finn-b-O15_MEMBR_PREMAT_RUPT
237	rs1153990	A	G	-0.058727	0.0128306	5.97e-06	14306	0.00146227	20.947	family Alcaligenaceae id.2875	ebi-a-GCST90016926		-0.0374	0.0289	0.1962	104247	3011	finn-b-O15_MEMBR_PREMAT_RUPT
238	rs147968	C	T	0.0489475	0.0110321	9.13e-06	14306	0.00137413	19.6827	family Alcaligenaceae id.2875	ebi-a-GCST90016926		-0.007	0.0268	0.7931	104247	3011	finn-b-O15_MEMBR_PREMAT_RUPT
239	rs17000015	A	T	-0.0609257	0.0125363	1.13e-06	14306	0.00164827	23.6157	family Alcaligenaceae id.2875	ebi-a-GCST90016926		-0.0267	0.03	0.3738	104247	3011	finn-b-O15_MEMBR_PREMAT_RUPT
240	rs2367850	G	C	0.0629104	0.0131712	1.85e-06	14306	0.00159215	22.8104	family Alcaligenaceae id.2875	ebi-a-GCST90016926		0.014	0.0329	0.671301	104247	3011	finn-b-O15_MEMBR_PREMAT_RUPT
241	rs28480294	C	T	0.0516967	0.0115503	6.61e-06	14306	0.00139834	20.0299	family Alcaligenaceae id.2875	ebi-a-GCST90016926		-0.002	0.028	0.9418	104247	3011	finn-b-O15_MEMBR_PREMAT_RUPT
242	rs4033856	T	C	-0.081834	0.0168931	1.03e-06	14306	0.00163764	23.4632	family Alcaligenaceae id.2875	ebi-a-GCST90016926		-0.0752	0.0477	0.1145	104247	3011	finn-b-O15_MEMBR_PREMAT_RUPT
243	rs62191117	A	G	0.0684302	0.0133636	2.76e-07	14306	0.00182951	26.2173	family Alcaligenaceae id.2875	ebi-a-GCST90016926		0.0422	0.0331	0.2035	104247	3011	finn-b-O15_MEMBR_PREMAT_RUPT
244	rs62395635	T	C	0.110583	0.0238514	3.35e-06	14306	0.0015003	21.4926	family Alcaligenaceae id.2875	ebi-a-GCST90016926		-0.0789	0.0559	0.1586	104247	3011	finn-b-O15_MEMBR_PREMAT_RUPT
245	rs67737557	C	G	0.0738409	0.0151678	1.04e-06	14306	0.00165391	23.6967	family Alcaligenaceae id.2875	ebi-a-GCST90016926		0.0997	0.0335	0.00287501	104247	3011	finn-b-O15_MEMBR_PREMAT_RUPT
246	rs6969323	A	C	-0.0593564	0.0129137	3.89e-06	14306	0.0014746	21.1238	family Alcaligenaceae id.2875	ebi-a-GCST90016926		0.0299	0.0323	0.3547	104247	3011	finn-b-O15_MEMBR_PREMAT_RUPT
247	rs7302582	G	C	-0.106817	0.023298	3.34e-06	14306	0.00146719	21.0176	family Alcaligenaceae id.2875	ebi-a-GCST90016926		0.0288	0.0591	0.6261	104247	3011	finn-b-O15_MEMBR_PREMAT_RUPT
248	rs74776516	T	G	-0.0944052	0.0213287	6.85e-06	14306	0.00136757	19.5886	family Alcaligenaceae id.2875	ebi-a-GCST90016926		-0.182	0.0534	0.000654395	104247	3011	finn-b-O15_MEMBR_PREMAT_RUPT
249	rs7638039	T	C	0.0603335	0.0127779	2.7e-06	14306	0.00155598	22.2914	family Alcaligenaceae id.2875	ebi-a-GCST90016926		-0.001	0.031	0.9731	104247	3011	finn-b-O15_MEMBR_PREMAT_RUPT
250	rs9537886	A	C	-0.0570888	0.0110683	2.35e-07	14306	0.00185616	26.5999	family Alcaligenaceae id.2875	ebi-a-GCST90016926		0.0048	0.0269	0.8577	104247	3011	finn-b-O15_MEMBR_PREMAT_RUPT
251	rs11585893	A	G	-0.0740746	0.0147633	1.8e-06	14306	0.00175667	25.1716	family Bacteroidaceae id.917	ebi-a-GCST90016927		-0.0401	0.0314	0.2019	104247	3011	finn-b-O15_MEMBR_PREMAT_RUPT
252	rs13207588	A	G	-0.059205	0.0131195	7.48e-06	14306	0.0014215	20.362	family Bacteroidaceae id.917	ebi-a-GCST90016927		0.0118	0.0341	0.7302	104247	3011	finn-b-O15_MEMBR_PREMAT_RUPT
253	rs1340391	T	C	-0.0592004	0.0132244	6.73e-06	14306	0.00139885	20.0372	family Bacteroidaceae id.917	ebi-a-GCST90016927		0.0581	0.0391	0.1378	104247	3011	finn-b-O15_MEMBR_PREMAT_RUPT
254	rs17619981	T	G	0.0880978	0.0187002	2.69e-06	14306	0.00154898	22.191	family Bacteroidaceae id.917	ebi-a-GCST90016927		-0.0706	0.039	0.0704206	104247	3011	finn-b-O15_MEMBR_PREMAT_RUPT
255	rs2023437	T	C	-0.0782325	0.0167634	5.02e-06	14306	0.0015201	21.7766	family Bacteroidaceae id.917	ebi-a-GCST90016927		-0.0277	0.0406	0.496	104247	3011	finn-b-O15_MEMBR_PREMAT_RUPT
256	rs2366421	T	A	-0.0528153	0.0117124	7.65e-06	14306	0.00141936	20.3314	family Bacteroidaceae id.917	ebi-a-GCST90016927		-0.0557	0.0349	0.1104	104247	3011	finn-b-O15_MEMBR_PREMAT_RUPT
257	rs28757219	T	A	0.0818398	0.0170319	1.29e-06	14306	0.00161133	23.0857	family Bacteroidaceae id.917	ebi-a-GCST90016927		0.0411	0.0412	0.3186	104247	3011	finn-b-O15_MEMBR_PREMAT_RUPT
258	rs495004	C	G	-0.0607475	0.0129865	3.42e-06	14306	0.00152718	21.8782	family Bacteroidaceae id.917	ebi-a-GCST90016927		-0.0187	0.032	0.5587	104247	3011	finn-b-O15_MEMBR_PREMAT_RUPT
259	rs66474973	G	T	0.0812515	0.0164479	6.81e-07	14306	0.00170288	24.3995	family Bacteroidaceae id.917	ebi-a-GCST90016927		-0.0478	0.0443	0.2798	104247	3011	finn-b-O15_MEMBR_PREMAT_RUPT
260	rs66710942	T	C	-0.0488038	0.0107412	5.86e-06	14306	0.00144098	20.6415	family Bacteroidaceae id.917	ebi-a-GCST90016927		0.0058	0.0267	0.8297	104247	3011	finn-b-O15_MEMBR_PREMAT_RUPT
261	rs6795673	C	T	0.0538565	0.0105251	3.38e-07	14306	0.00182689	26.1796	family Bacteroidaceae id.917	ebi-a-GCST90016927		0.0571	0.0267	0.0320302	104247	3011	finn-b-O15_MEMBR_PREMAT_RUPT
262	rs9507307	C	T	0.0604456	0.0129128	2.13e-06	14306	0.00152935	21.9093	family Bacteroidaceae id.917	ebi-a-GCST90016927		-0.0073	0.0311	0.8137	104247	3011	finn-b-O15_MEMBR_PREMAT_RUPT
263	rs10872669	G	A	0.123071	0.0275665	9.49e-06	14306	0.00139131	19.9291	family Bacteroidales S24 7group id.11173	ebi-a-GCST90016928		-0.0203	0.0468	0.665001	104247	3011	finn-b-O15_MEMBR_PREMAT_RUPT
264	rs11135366	C	G	0.0842142	0.0183739	8.78e-06	14306	0.00146627	21.0043	family Bacteroidales S24 7group id.11173	ebi-a-GCST90016928		-0.0347	0.0315	0.27	104247	3011	finn-b-O15_MEMBR_PREMAT_RUPT
265	rs12748533	G	T	-0.0821108	0.0172701	2.59e-06	14306	0.00157764	22.6022	family Bacteroidales S24 7group id.11173	ebi-a-GCST90016928		-0.0001	0.0295	0.9974	104247	3011	finn-b-O15_MEMBR_PREMAT_RUPT
266	rs17043785	T	C	-0.176187	0.0347133	5.12e-07	14306	0.00179745	25.757	family Bacteroidales S24 7group id.11173	ebi-a-GCST90016928		-0.0184	0.047	0.6959	104247	3011	finn-b-O15_MEMBR_PREMAT_RUPT
267	rs1850003	A	G	0.084048	0.0177806	2.41e-06	14306	0.00155943	22.3409	family Bacteroidales S24 7group id.11173	ebi-a-GCST90016928		-0.029	0.0317	0.3602	104247	3011	finn-b-O15_MEMBR_PREMAT_RUPT
268	rs61508842	T	C	0.122574	0.0272389	7.83e-06	14306	0.00141347	20.2468	family Bacteroidales S24 7group id.11173	ebi-a-GCST90016928		-0.0797	0.0477	0.0947611	104247	3011	finn-b-O15_MEMBR_PREMAT_RUPT
269	rs6831034	T	A	-0.0956546	0.0205228	6.1e-06	14306	0.00151622	21.7209	family Bacteroidales S24 7group id.11173	ebi-a-GCST90016928		0.0082	0.0466	0.8596	104247	3011	finn-b-O15_MEMBR_PREMAT_RUPT
270	rs738193	T	C	0.0847328	0.0165856	3.82e-07	14306	0.00182109	26.0964	family Bacteroidales S24 7group id.11173	ebi-a-GCST90016928		0.0045	0.028	0.8734	104247	3011	finn-b-O15_MEMBR_PREMAT_RUPT
271	rs78609301	A	G	-0.0867065	0.0195709	7.09e-06	14306	0.00137015	19.6255	family Bacteroidales S24 7group id.11173	ebi-a-GCST90016928		0.0023	0.0293	0.9383	104247	3011	finn-b-O15_MEMBR_PREMAT_RUPT
272	rs941000	T	C	-0.0850266	0.0163382	3.16e-07	14306	0.00188956	27.0795	family Bacteroidales S24 7group id.11173	ebi-a-GCST90016928		-0.0319	0.0278	0.2505	104247	3011	finn-b-O15_MEMBR_PREMAT_RUPT
273	rs10496759	G	C	0.0637133	0.0144305	8.8e-06	14306	0.00136078	19.4911	family Bifidobacteriaceae id.433	ebi-a-GCST90016929		0.019	0.0323	0.5555	104247	3011	finn-b-O15_MEMBR_PREMAT_RUPT
274	rs10831953	G	A	0.0537537	0.0123746	9.95e-06	14306	0.00131724	18.8666	family Bifidobacteriaceae id.433	ebi-a-GCST90016929		0.0134	0.0292	0.6469	104247	3011	finn-b-O15_MEMBR_PREMAT_RUPT
275	rs10841473	G	C	-0.0613031	0.0128844	2.28e-06	14306	0.00157991	22.6348	family Bifidobacteriaceae id.433	ebi-a-GCST90016929		-0.0533	0.0317	0.0927897	104247	3011	finn-b-O15_MEMBR_PREMAT_RUPT
276	rs10857328	T	A	0.0562	0.0126395	7.24e-06	14306	0.00138005	19.7675	family Bifidobacteriaceae id.433	ebi-a-GCST90016929		0.0463	0.0297	0.1188	104247	3011	finn-b-O15_MEMBR_PREMAT_RUPT
277	rs12446429	T	C	0.0810099	0.019073	8.53e-06	14306	0.00125943	18.0375	family Bifidobacteriaceae id.433	ebi-a-GCST90016929		-0.0392	0.0346	0.2576	104247	3011	finn-b-O15_MEMBR_PREMAT_RUPT
278	rs13020688	G	A	0.0584045	0.0122081	1.57e-06	14306	0.00159729	22.8842	family Bifidobacteriaceae id.433	ebi-a-GCST90016929		0.0029	0.0291	0.9192	104247	3011	finn-b-O15_MEMBR_PREMAT_RUPT
279	rs182549	T	C	-0.11707	0.0126703	5.94e-20	14306	0.00593219	85.3605	family Bifidobacteriaceae id.433	ebi-a-GCST90016929		-0.0212	0.0272	0.435	104247	3011	finn-b-O15_MEMBR_PREMAT_RUPT
280	rs4567981	T	A	0.0577763	0.0117388	8.88e-07	14306	0.00169044	24.221	family Bifidobacteriaceae id.433	ebi-a-GCST90016929		0.0105	0.0268	0.6946	104247	3011	finn-b-O15_MEMBR_PREMAT_RUPT
281	rs4957061	T	C	0.0569873	0.0116907	1.15e-06	14306	0.0016582	23.7582	family Bifidobacteriaceae id.433	ebi-a-GCST90016929		0.0428	0.0272	0.1157	104247	3011	finn-b-O15_MEMBR_PREMAT_RUPT
282	rs540489	T	G	-0.0632518	0.013817	5.37e-06	14306	0.00146273	20.9535	family Bifidobacteriaceae id.433	ebi-a-GCST90016929		-0.021	0.0351	0.548399	104247	3011	finn-b-O15_MEMBR_PREMAT_RUPT
283	rs55888705	A	G	0.053673	0.0120586	8.66e-06	14306	0.00138292	19.8088	family Bifidobacteriaceae id.433	ebi-a-GCST90016929		-0.0306	0.0298	0.3036	104247	3011	finn-b-O15_MEMBR_PREMAT_RUPT
284	rs677208	C	G	-0.0728589	0.0164821	6e-06	14306	0.00136405	19.538	family Bifidobacteriaceae id.433	ebi-a-GCST90016929		-0.0397	0.0355	0.2636	104247	3011	finn-b-O15_MEMBR_PREMAT_RUPT
285	rs6899771	A	G	-0.0914312	0.0202604	7.28e-06	14306	0.00142153	20.3625	family Bifidobacteriaceae id.433	ebi-a-GCST90016929		0.0026	0.0445	0.9531	104247	3011	finn-b-O15_MEMBR_PREMAT_RUPT
286	rs7174549	T	C	-0.0551726	0.0124655	6.87e-06	14306	0.00136746	19.5869	family Bifidobacteriaceae id.433	ebi-a-GCST90016929		-0.0293	0.0278	0.2921	104247	3011	finn-b-O15_MEMBR_PREMAT_RUPT
287	rs7322849	T	C	0.110676	0.0200996	1.74e-08	14306	0.00211492	30.316	family Bifidobacteriaceae id.433	ebi-a-GCST90016929		-0.011	0.0467	0.8146	104247	3011	finn-b-O15_MEMBR_PREMAT_RUPT
288	rs73797465	T	G	-0.0942612	0.0208421	4.85e-06	14306	0.00142772	20.4514	family Bifidobacteriaceae id.433	ebi-a-GCST90016929		-0.0028	0.0423	0.9467	104247	3011	finn-b-O15_MEMBR_PREMAT_RUPT
289	rs76671854	C	G	-0.0892981	0.0183177	1.04e-06	14306	0.00165845	23.7619	family Bifidobacteriaceae id.433	ebi-a-GCST90016929		0.0101	0.0406	0.8044	104247	3011	finn-b-O15_MEMBR_PREMAT_RUPT
290	rs857444	C	T	0.0553965	0.0120669	3.82e-06	14306	0.00147101	21.0723	family Bifidobacteriaceae id.433	ebi-a-GCST90016929		-0.0162	0.0277	0.5586	104247	3011	finn-b-O15_MEMBR_PREMAT_RUPT
291	rs10875374	T	C	0.0536759	0.0119436	8.1e-06	14306	0.0014098	20.1942	family Clostridiaceae1 id.1869	ebi-a-GCST90016931		0.0482	0.0267	0.0711295	104247	3011	finn-b-O15_MEMBR_PREMAT_RUPT
292	rs12186080	G	A	0.0748236	0.016246	5.34e-06	14306	0.00148055	21.2092	family Clostridiaceae1 id.1869	ebi-a-GCST90016931		-0.0307	0.0361	0.3957	104247	3011	finn-b-O15_MEMBR_PREMAT_RUPT
293	rs12341505	G	A	0.0814503	0.0179338	4.54e-06	14306	0.00143978	20.6243	family Clostridiaceae1 id.1869	ebi-a-GCST90016931		-0.1077	0.0454	0.0176299	104247	3011	finn-b-O15_MEMBR_PREMAT_RUPT
294	rs12490337	C	G	-0.0616944	0.013693	6.91e-06	14306	0.00141697	20.2971	family Clostridiaceae1 id.1869	ebi-a-GCST90016931		-0.0214	0.0333	0.520701	104247	3011	finn-b-O15_MEMBR_PREMAT_RUPT
295	rs2795528	G	A	-0.180969	0.0390911	3.81e-06	14306	0.00149584	21.4285	family Clostridiaceae1 id.1869	ebi-a-GCST90016931		-0.036	0.0584	0.5382	104247	3011	finn-b-O15_MEMBR_PREMAT_RUPT
296	rs2817172	C	T	0.0563367	0.012392	5.27e-06	14306	0.00144263	20.6652	family Clostridiaceae1 id.1869	ebi-a-GCST90016931		0.0041	0.0273	0.8797	104247	3011	finn-b-O15_MEMBR_PREMAT_RUPT
297	rs4723021	T	C	-0.106376	0.0241944	7.42e-06	14306	0.00134944	19.3284	family Clostridiaceae1 id.1869	ebi-a-GCST90016931		0.0443	0.0535	0.4067	104247	3011	finn-b-O15_MEMBR_PREMAT_RUPT
298	rs550843	T	C	-0.0734787	0.0168383	7.09e-06	14306	0.00132932	19.0399	family Clostridiaceae1 id.1869	ebi-a-GCST90016931		0.0549	0.0297	0.0650594	104247	3011	finn-b-O15_MEMBR_PREMAT_RUPT
299	rs56188186	A	G	0.0967773	0.0217471	8.24e-06	14306	0.00138237	19.8008	family Clostridiaceae1 id.1869	ebi-a-GCST90016931		-0.0569	0.063	0.3663	104247	3011	finn-b-O15_MEMBR_PREMAT_RUPT
300	rs62397761	A	G	0.0615805	0.0136198	9.08e-06	14306	0.00142694	20.4402	family Clostridiaceae1 id.1869	ebi-a-GCST90016931		-0.0483	0.0286	0.0915293	104247	3011	finn-b-O15_MEMBR_PREMAT_RUPT
301	rs881532	G	A	0.0533035	0.0119011	7.9e-06	14306	0.00140027	20.0575	family Clostridiaceae1 id.1869	ebi-a-GCST90016931		0.0264	0.0267	0.3231	104247	3011	finn-b-O15_MEMBR_PREMAT_RUPT
302	rs10517600	G	T	-0.0626993	0.0139364	6.83e-06	14306	0.00141284	20.2378	family Clostridiales vadin BB60 group id.11286	ebi-a-GCST90016932		0.0249	0.0276	0.3672	104247	3011	finn-b-O15_MEMBR_PREMAT_RUPT
303	rs10904722	C	T	-0.0672314	0.0147123	5.05e-06	14306	0.00145758	20.8796	family Clostridiales vadin BB60 group id.11286	ebi-a-GCST90016932		0.0268	0.0313	0.3925	104247	3011	finn-b-O15_MEMBR_PREMAT_RUPT
304	rs118104867	C	T	0.214464	0.0455098	3.44e-06	14306	0.00154991	22.2044	family Clostridiales vadin BB60 group id.11286	ebi-a-GCST90016932		-0.0346	0.0526	0.511	104247	3011	finn-b-O15_MEMBR_PREMAT_RUPT
305	rs13409132	A	G	-0.165419	0.0352154	4.37e-06	14306	0.00153999	22.062	family Clostridiales vadin BB60 group id.11286	ebi-a-GCST90016932		-0.0274	0.072	0.702999	104247	3011	finn-b-O15_MEMBR_PREMAT_RUPT
306	rs17121075	G	A	0.0769254	0.0172234	7.91e-06	14306	0.00139245	19.9453	family Clostridiales vadin BB60 group id.11286	ebi-a-GCST90016932		0.0009	0.0327	0.9781	104247	3011	finn-b-O15_MEMBR_PREMAT_RUPT
307	rs2191834	T	G	-0.0746375	0.0159136	2.5e-06	14306	0.0015353	21.9946	family Clostridiales vadin BB60 group id.11286	ebi-a-GCST90016932		-0.0026	0.0313	0.9339	104247	3011	finn-b-O15_MEMBR_PREMAT_RUPT
308	rs28691777	C	T	0.137134	0.0266996	6.96e-07	14306	0.00184061	26.3767	family Clostridiales vadin BB60 group id.11286	ebi-a-GCST90016932		0.0903	0.0652	0.1658	104247	3011	finn-b-O15_MEMBR_PREMAT_RUPT
309	rs34088226	A	G	-0.117807	0.026924	7.66e-06	14306	0.00133649	19.1427	family Clostridiales vadin BB60 group id.11286	ebi-a-GCST90016932		0.0404	0.058	0.4861	104247	3011	finn-b-O15_MEMBR_PREMAT_RUPT
310	rs55682560	C	T	-0.131519	0.0261319	4.97e-07	14306	0.00176746	25.3264	family Clostridiales vadin BB60 group id.11286	ebi-a-GCST90016932		0.1334	0.0498	0.00741498	104247	3011	finn-b-O15_MEMBR_PREMAT_RUPT
311	rs6588624	A	G	0.0662317	0.0138147	1.79e-06	14306	0.00160411	22.982	family Clostridiales vadin BB60 group id.11286	ebi-a-GCST90016932		0.0644	0.0268	0.0160602	104247	3011	finn-b-O15_MEMBR_PREMAT_RUPT
312	rs66714985	A	C	0.116908	0.0252447	4.85e-06	14306	0.00149685	21.4431	family Clostridiales vadin BB60 group id.11286	ebi-a-GCST90016932		-0.0119	0.0443	0.7886	104247	3011	finn-b-O15_MEMBR_PREMAT_RUPT
313	rs6755871	C	G	-0.0613825	0.0138976	9.33e-06	14306	0.00136176	19.5051	family Clostridiales vadin BB60 group id.11286	ebi-a-GCST90016932		-0.0286	0.0268	0.2857	104247	3011	finn-b-O15_MEMBR_PREMAT_RUPT
314	rs7226487	A	G	-0.0643682	0.0138701	3.58e-06	14306	0.00150318	21.5339	family Clostridiales vadin BB60 group id.11286	ebi-a-GCST90016932		0.0032	0.0268	0.9039	104247	3011	finn-b-O15_MEMBR_PREMAT_RUPT
315	rs7538034	T	G	-0.078598	0.0165982	2.37e-06	14306	0.00156496	22.4202	family Clostridiales vadin BB60 group id.11286	ebi-a-GCST90016932		-0.0074	0.0363	0.8384	104247	3011	finn-b-O15_MEMBR_PREMAT_RUPT
316	rs7725895	A	G	-0.116224	0.0240367	3.94e-06	14306	0.0016316	23.3766	family Clostridiales vadin BB60 group id.11286	ebi-a-GCST90016932		-0.0513	0.0411	0.2121	104247	3011	finn-b-O15_MEMBR_PREMAT_RUPT
317	rs989682	A	G	0.070194	0.0155364	6.85e-06	14306	0.00142483	20.4098	family Clostridiales vadin BB60 group id.11286	ebi-a-GCST90016932		0.062	0.0316	0.0498804	104247	3011	finn-b-O15_MEMBR_PREMAT_RUPT
318	rs9979874	G	C	-0.0738925	0.0150911	1.05e-06	14306	0.00167307	23.9717	family Clostridiales vadin BB60 group id.11286	ebi-a-GCST90016932		-0.0467	0.0285	0.1017	104247	3011	finn-b-O15_MEMBR_PREMAT_RUPT
319	rs11250875	T	C	0.06075	0.0130939	4.83e-06	14306	0.00150239	21.5226	family Coriobacteriaceae id.811	ebi-a-GCST90016933		-0.0062	0.0326	0.8495	104247	3011	finn-b-O15_MEMBR_PREMAT_RUPT
320	rs11656361	A	C	0.0773006	0.017553	8.02e-06	14306	0.00135381	19.3911	family Coriobacteriaceae id.811	ebi-a-GCST90016933		-0.0091	0.0347	0.793999	104247	3011	finn-b-O15_MEMBR_PREMAT_RUPT
321	rs12974142	G	A	0.0789796	0.0177205	8.51e-06	14306	0.00138662	19.8617	family Coriobacteriaceae id.811	ebi-a-GCST90016933		0.0194	0.0523	0.7103	104247	3011	finn-b-O15_MEMBR_PREMAT_RUPT
322	rs13307134	T	C	-0.0565686	0.0126265	7.8e-06	14306	0.00140106	20.0689	family Coriobacteriaceae id.811	ebi-a-GCST90016933		-0.0356	0.0357	0.3191	104247	3011	finn-b-O15_MEMBR_PREMAT_RUPT
323	rs1397793	A	G	0.0498855	0.0112446	9.77e-06	14306	0.00137387	19.6789	family Coriobacteriaceae id.811	ebi-a-GCST90016933		0.0291	0.0295	0.3235	104247	3011	finn-b-O15_MEMBR_PREMAT_RUPT
324	rs1816223	G	A	0.0586265	0.0129006	4.84e-06	14306	0.00144153	20.6494	family Coriobacteriaceae id.811	ebi-a-GCST90016933		-0.0262	0.0335	0.4341	104247	3011	finn-b-O15_MEMBR_PREMAT_RUPT
325	rs240104	T	C	-0.0603429	0.0126849	1.52e-06	14306	0.00157933	22.6265	family Coriobacteriaceae id.811	ebi-a-GCST90016933		0.006	0.0298	0.8402	104247	3011	finn-b-O15_MEMBR_PREMAT_RUPT
326	rs2442778	A	G	0.116408	0.0258545	9.03e-06	14306	0.00141501	20.269	family Coriobacteriaceae id.811	ebi-a-GCST90016933		0.0027	0.0601	0.964	104247	3011	finn-b-O15_MEMBR_PREMAT_RUPT
327	rs3025411	A	G	0.0926543	0.0209468	8.27e-06	14306	0.00136579	19.563	family Coriobacteriaceae id.811	ebi-a-GCST90016933		-0.039	0.0437	0.3727	104247	3011	finn-b-O15_MEMBR_PREMAT_RUPT
328	rs34739816	G	T	0.0965017	0.0207666	3.88e-06	14306	0.00150718	21.5913	family Coriobacteriaceae id.811	ebi-a-GCST90016933		0.1567	0.0576	0.00656493	104247	3011	finn-b-O15_MEMBR_PREMAT_RUPT
329	rs62448869	T	A	-0.0486059	0.0108982	7.87e-06	14306	0.0013885	19.8888	family Coriobacteriaceae id.811	ebi-a-GCST90016933		-0.0244	0.0269	0.3644	104247	3011	finn-b-O15_MEMBR_PREMAT_RUPT
330	rs67561917	A	G	-0.0714367	0.0154113	5.39e-06	14306	0.00149967	21.4834	family Coriobacteriaceae id.811	ebi-a-GCST90016933		0.0138	0.0346	0.6901	104247	3011	finn-b-O15_MEMBR_PREMAT_RUPT
331	rs719099	A	G	0.0778402	0.0155815	5.43e-07	14306	0.00174146	24.9533	family Coriobacteriaceae id.811	ebi-a-GCST90016933		0.1306	0.045	0.00369803	104247	3011	finn-b-O15_MEMBR_PREMAT_RUPT
332	rs76779974	C	G	0.0774888	0.0171877	5.63e-06	14306	0.00141876	20.3227	family Coriobacteriaceae id.811	ebi-a-GCST90016933		-0.022	0.0457	0.6297	104247	3011	finn-b-O15_MEMBR_PREMAT_RUPT
333	rs80046645	C	G	0.25584	0.0561995	4.66e-06	14306	0.00144652	20.721	family Coriobacteriaceae id.811	ebi-a-GCST90016933		-0.1051	0.0698	0.1325	104247	3011	finn-b-O15_MEMBR_PREMAT_RUPT
334	rs8010111	A	G	0.103377	0.0229286	6.9e-06	14306	0.00141892	20.3251	family Coriobacteriaceae id.811	ebi-a-GCST90016933		-0.0354	0.0489	0.469	104247	3011	finn-b-O15_MEMBR_PREMAT_RUPT
335	rs112893842	T	C	0.110761	0.0232545	2.75e-06	14306	0.00158326	22.6829	family Defluviitaleaceae id.1924	ebi-a-GCST90016934		-0.0259	0.0468	0.579499	104247	3011	finn-b-O15_MEMBR_PREMAT_RUPT
336	rs1582238	C	T	-0.0801923	0.0167061	1.69e-06	14306	0.00160804	23.0385	family Defluviitaleaceae id.1924	ebi-a-GCST90016934		0.0076	0.0279	0.7861	104247	3011	finn-b-O15_MEMBR_PREMAT_RUPT
337	rs17051335	C	T	-0.134314	0.0292201	4.58e-06	14306	0.00147475	21.1261	family Defluviitaleaceae id.1924	ebi-a-GCST90016934		0.0102	0.0441	0.8175	104247	3011	finn-b-O15_MEMBR_PREMAT_RUPT
338	rs1908593	T	C	0.070223	0.0156601	7.86e-06	14306	0.00140359	20.1052	family Defluviitaleaceae id.1924	ebi-a-GCST90016934		-0.0247	0.0272	0.3626	104247	3011	finn-b-O15_MEMBR_PREMAT_RUPT
339	rs28696126	T	A	0.107106	0.0238173	5.56e-06	14306	0.0014116	20.22	family Defluviitaleaceae id.1924	ebi-a-GCST90016934		-0.0048	0.0401	0.9056	104247	3011	finn-b-O15_MEMBR_PREMAT_RUPT
340	rs4344384	T	G	-0.0708803	0.0156121	5.86e-06	14306	0.00143875	20.6095	family Defluviitaleaceae id.1924	ebi-a-GCST90016934		-0.0126	0.0268	0.6388	104247	3011	finn-b-O15_MEMBR_PREMAT_RUPT
341	rs4677103	A	G	0.0977203	0.0197033	9.42e-07	14306	0.00171644	24.5941	family Defluviitaleaceae id.1924	ebi-a-GCST90016934		0.007	0.0353	0.8426	104247	3011	finn-b-O15_MEMBR_PREMAT_RUPT
342	rs540220	C	T	0.123954	0.0289814	9.48e-06	14306	0.00127705	18.2903	family Defluviitaleaceae id.1924	ebi-a-GCST90016934		0.0305	0.047	0.5156	104247	3011	finn-b-O15_MEMBR_PREMAT_RUPT
343	rs55658617	T	C	0.177314	0.0361844	1.41e-06	14306	0.0016757	24.0095	family Defluviitaleaceae id.1924	ebi-a-GCST90016934		-0.007	0.0731	0.9235	104247	3011	finn-b-O15_MEMBR_PREMAT_RUPT
344	rs72731813	C	T	-0.149751	0.0293415	2.76e-07	14306	0.00181747	26.0444	family Defluviitaleaceae id.1924	ebi-a-GCST90016934		-0.0021	0.0629	0.9728	104247	3011	finn-b-O15_MEMBR_PREMAT_RUPT
345	rs9608282	T	G	0.139014	0.0299429	4.61e-06	14306	0.00150438	21.5511	family Defluviitaleaceae id.1924	ebi-a-GCST90016934		-0.0818	0.0737	0.2667	104247	3011	finn-b-O15_MEMBR_PREMAT_RUPT
346	rs9725395	A	G	-0.138357	0.0295185	3.41e-06	14306	0.00153331	21.9661	family Defluviitaleaceae id.1924	ebi-a-GCST90016934		0.0156	0.0422	0.710799	104247	3011	finn-b-O15_MEMBR_PREMAT_RUPT
347	rs112381107	C	T	0.211435	0.0456962	2.82e-06	14306	0.00149426	21.4059	family Desulfovibrionaceae id.3169	ebi-a-GCST90016935		0.0081	0.0564	0.8859	104247	3011	finn-b-O15_MEMBR_PREMAT_RUPT
348	rs11599763	C	T	0.0555931	0.0117493	2.5e-06	14306	0.0015625	22.385	family Desulfovibrionaceae id.3169	ebi-a-GCST90016935		-0.0587	0.0274	0.03234	104247	3011	finn-b-O15_MEMBR_PREMAT_RUPT
349	rs16851319	G	C	-0.0732697	0.0150964	2.4e-06	14306	0.00164388	23.5527	family Desulfovibrionaceae id.3169	ebi-a-GCST90016935		-0.0576	0.0355	0.1047	104247	3011	finn-b-O15_MEMBR_PREMAT_RUPT
350	rs17791387	A	G	-0.0729251	0.0154381	2.1e-06	14306	0.0015573	22.3103	family Desulfovibrionaceae id.3169	ebi-a-GCST90016935		0.0681	0.0454	0.1338	104247	3011	finn-b-O15_MEMBR_PREMAT_RUPT
351	rs2692012	G	A	-0.114231	0.0253568	1.56e-06	14306	0.00141659	20.2917	family Desulfovibrionaceae id.3169	ebi-a-GCST90016935		-0.0748	0.0592	0.2065	104247	3011	finn-b-O15_MEMBR_PREMAT_RUPT
352	rs2838334	G	A	0.0571419	0.012423	3.82e-06	14306	0.00147671	21.1542	family Desulfovibrionaceae id.3169	ebi-a-GCST90016935		0.0244	0.0281	0.3851	104247	3011	finn-b-O15_MEMBR_PREMAT_RUPT
353	rs3935584	C	T	-0.0525838	0.0115757	6.78e-06	14306	0.00144034	20.6323	family Desulfovibrionaceae id.3169	ebi-a-GCST90016935		-0.0006	0.0269	0.9815	104247	3011	finn-b-O15_MEMBR_PREMAT_RUPT
354	rs4506934	C	T	-0.0943381	0.020138	3.16e-06	14306	0.00153164	21.9422	family Desulfovibrionaceae id.3169	ebi-a-GCST90016935		-0.0247	0.0418	0.5538	104247	3011	finn-b-O15_MEMBR_PREMAT_RUPT
355	rs6058181	C	T	0.0834742	0.0166111	2.7e-07	14306	0.00176207	25.2492	family Desulfovibrionaceae id.3169	ebi-a-GCST90016935		0.0507	0.0362	0.161	104247	3011	finn-b-O15_MEMBR_PREMAT_RUPT
356	rs7164160	A	T	-0.0574455	0.0129468	7.34e-06	14306	0.00137427	19.6846	family Desulfovibrionaceae id.3169	ebi-a-GCST90016935		0.0526	0.0349	0.1319	104247	3011	finn-b-O15_MEMBR_PREMAT_RUPT
357	rs72647048	T	C	-0.0770089	0.017089	9.61e-06	14306	0.00141747	20.3043	family Desulfovibrionaceae id.3169	ebi-a-GCST90016935		-0.0675	0.0424	0.1115	104247	3011	finn-b-O15_MEMBR_PREMAT_RUPT
358	rs9928243	C	A	-0.0541732	0.0117819	4.48e-06	14306	0.00147563	21.1387	family Desulfovibrionaceae id.3169	ebi-a-GCST90016935		-0.0215	0.0267	0.4207	104247	3011	finn-b-O15_MEMBR_PREMAT_RUPT
359	rs11026530	T	C	0.0822408	0.0186379	9.43e-06	14306	0.00135916	19.4679	family Enterobacteriaceae id.3469	ebi-a-GCST90016936		0.0125	0.0375	0.7382	104247	3011	finn-b-O15_MEMBR_PREMAT_RUPT
360	rs111229068	A	T	0.110561	0.0241719	3.65e-06	14306	0.00146026	20.9181	family Enterobacteriaceae id.3469	ebi-a-GCST90016936		-0.0231	0.0494	0.639599	104247	3011	finn-b-O15_MEMBR_PREMAT_RUPT
361	rs2374342	C	A	0.0582927	0.0126195	4.52e-06	14306	0.00148929	21.3345	family Enterobacteriaceae id.3469	ebi-a-GCST90016936		0.0068	0.0272	0.8015	104247	3011	finn-b-O15_MEMBR_PREMAT_RUPT
362	rs35673018	G	A	0.0899642	0.0202934	7.63e-06	14306	0.00137188	19.6503	family Enterobacteriaceae id.3469	ebi-a-GCST90016936		0.0889	0.047	0.0587097	104247	3011	finn-b-O15_MEMBR_PREMAT_RUPT
363	rs4792380	A	T	0.115598	0.0257683	9.49e-06	14306	0.00140475	20.1219	family Enterobacteriaceae id.3469	ebi-a-GCST90016936		-0.1272	0.0778	0.1021	104247	3011	finn-b-O15_MEMBR_PREMAT_RUPT
364	rs504442	T	G	0.084159	0.0189479	5.17e-06	14306	0.00137709	19.7251	family Enterobacteriaceae id.3469	ebi-a-GCST90016936		-0.0034	0.0437	0.9384	104247	3011	finn-b-O15_MEMBR_PREMAT_RUPT
365	rs61973590	C	G	-0.0605392	0.0133696	8.54e-06	14306	0.00143119	20.501	family Enterobacteriaceae id.3469	ebi-a-GCST90016936		-0.0075	0.0281	0.788199	104247	3011	finn-b-O15_MEMBR_PREMAT_RUPT
366	rs62210023	A	G	0.0606754	0.0130125	3.13e-06	14306	0.00151749	21.7392	family Enterobacteriaceae id.3469	ebi-a-GCST90016936		0.013	0.028	0.6422	104247	3011	finn-b-O15_MEMBR_PREMAT_RUPT
367	rs78143293	A	G	-0.0848521	0.0170415	1.2e-06	14306	0.00172997	24.7884	family Enterobacteriaceae id.3469	ebi-a-GCST90016936		0.014	0.0407	0.730999	104247	3011	finn-b-O15_MEMBR_PREMAT_RUPT
368	rs79757635	C	A	0.0758597	0.0171286	9.32e-06	14306	0.00136919	19.6118	family Enterobacteriaceae id.3469	ebi-a-GCST90016936		-0.0222	0.0398	0.5762	104247	3011	finn-b-O15_MEMBR_PREMAT_RUPT
369	rs80319214	C	G	0.0990404	0.0215877	6.95e-06	14306	0.00146911	21.0451	family Enterobacteriaceae id.3469	ebi-a-GCST90016936		0.1033	0.0515	0.0446704	104247	3011	finn-b-O15_MEMBR_PREMAT_RUPT
370	rs1074800	G	A	-0.0492438	0.010887	6.15e-06	14306	0.00142806	20.4562	family Erysipelotrichaceae id.2149	ebi-a-GCST90016937		-0.0266	0.027	0.3245	104247	3011	finn-b-O15_MEMBR_PREMAT_RUPT
371	rs10781552	C	T	-0.0552212	0.0116074	2.33e-06	14306	0.00157956	22.6298	family Erysipelotrichaceae id.2149	ebi-a-GCST90016937		-0.0056	0.0298	0.8499	104247	3011	finn-b-O15_MEMBR_PREMAT_RUPT
372	rs17530232	A	G	0.10305	0.0224648	2.79e-06	14306	0.0014687	21.0392	family Erysipelotrichaceae id.2149	ebi-a-GCST90016937		-0.1396	0.06	0.0200701	104247	3011	finn-b-O15_MEMBR_PREMAT_RUPT
373	rs1884466	C	T	-0.0475363	0.0106939	9.53e-06	14306	0.00137931	19.7569	family Erysipelotrichaceae id.2149	ebi-a-GCST90016937		0.0286	0.0269	0.2879	104247	3011	finn-b-O15_MEMBR_PREMAT_RUPT
374	rs2300774	A	G	-0.0524152	0.0106784	8.95e-07	14306	0.00168133	24.0903	family Erysipelotrichaceae id.2149	ebi-a-GCST90016937		-0.0193	0.0268	0.4713	104247	3011	finn-b-O15_MEMBR_PREMAT_RUPT
375	rs290833	T	G	-0.0497374	0.0111376	8.03e-06	14306	0.00139207	19.9399	family Erysipelotrichaceae id.2149	ebi-a-GCST90016937		-0.0057	0.0269	0.8322	104247	3011	finn-b-O15_MEMBR_PREMAT_RUPT
376	rs35161940	T	C	-0.0806041	0.0167641	1.85e-06	14306	0.00161337	23.115	family Erysipelotrichaceae id.2149	ebi-a-GCST90016937		-0.032	0.0434	0.4607	104247	3011	finn-b-O15_MEMBR_PREMAT_RUPT
377	rs4078432	T	C	0.0608929	0.0133764	4.23e-06	14306	0.00144647	20.7202	family Erysipelotrichaceae id.2149	ebi-a-GCST90016937		-0.027	0.0355	0.4469	104247	3011	finn-b-O15_MEMBR_PREMAT_RUPT
378	rs56970041	T	G	0.0724145	0.0164471	5.4e-06	14306	0.00135321	19.3826	family Erysipelotrichaceae id.2149	ebi-a-GCST90016937		-0.0795	0.0562	0.1568	104247	3011	finn-b-O15_MEMBR_PREMAT_RUPT
379	rs62504403	C	T	0.0681159	0.0127883	1.12e-07	14306	0.00197921	28.3668	family Erysipelotrichaceae id.2149	ebi-a-GCST90016937		-0.0058	0.0339	0.8639	104247	3011	finn-b-O15_MEMBR_PREMAT_RUPT
380	rs7234058	T	C	-0.0945759	0.0194091	9.12e-07	14306	0.00165696	23.7405	family Erysipelotrichaceae id.2149	ebi-a-GCST90016937		0.0493	0.0465	0.2888	104247	3011	finn-b-O15_MEMBR_PREMAT_RUPT
381	rs7826267	G	T	0.0839071	0.0199131	9.28e-06	14306	0.00123955	17.7525	family Erysipelotrichaceae id.2149	ebi-a-GCST90016937		-0.0003	0.0543	0.9957	104247	3011	finn-b-O15_MEMBR_PREMAT_RUPT
382	rs8003149	C	T	0.0538798	0.0116888	4.08e-06	14306	0.00148303	21.2447	family Erysipelotrichaceae id.2149	ebi-a-GCST90016937		-0.0281	0.0284	0.322	104247	3011	finn-b-O15_MEMBR_PREMAT_RUPT
383	rs10759623	C	T	-0.162115	0.032151	5.78e-07	14306	0.00177406	25.4212	family Family XI id.1936	ebi-a-GCST90016938		-0.0084	0.032	0.793	104247	3011	finn-b-O15_MEMBR_PREMAT_RUPT
384	rs11547158	A	G	-0.177599	0.0372795	2.7e-06	14306	0.00158392	22.6924	family Family XI id.1936	ebi-a-GCST90016938		-0.0343	0.0395	0.3853	104247	3011	finn-b-O15_MEMBR_PREMAT_RUPT
385	rs17379710	T	C	-0.116383	0.0252125	3.97e-06	14306	0.00148725	21.3052	family Family XI id.1936	ebi-a-GCST90016938		0.0375	0.0271	0.1662	104247	3011	finn-b-O15_MEMBR_PREMAT_RUPT
386	rs2155352	A	G	-0.150538	0.0302319	6.63e-07	14306	0.00173018	24.7914	family Family XI id.1936	ebi-a-GCST90016938		0.0673	0.0316	0.0332499	104247	3011	finn-b-O15_MEMBR_PREMAT_RUPT
387	rs2156611	T	C	-0.112486	0.0251099	9.43e-06	14306	0.00140081	20.0653	family Family XI id.1936	ebi-a-GCST90016938		0.0214	0.0267	0.4239	104247	3011	finn-b-O15_MEMBR_PREMAT_RUPT
388	rs3733511	A	G	0.128253	0.0274718	3.39e-06	14306	0.00152118	21.7922	family Family XI id.1936	ebi-a-GCST90016938		0.0071	0.0292	0.8089	104247	3011	finn-b-O15_MEMBR_PREMAT_RUPT
389	rs488164	G	T	-0.117998	0.025516	4.8e-06	14306	0.00149265	21.3827	family Family XI id.1936	ebi-a-GCST90016938		-0.017	0.028	0.542	104247	3011	finn-b-O15_MEMBR_PREMAT_RUPT
390	rs6025153	C	G	-0.118619	0.0261969	7.07e-06	14306	0.0014311	20.4997	family Family XI id.1936	ebi-a-GCST90016938		0.0076	0.0273	0.779701	104247	3011	finn-b-O15_MEMBR_PREMAT_RUPT
391	rs697771	A	G	-0.117677	0.0251491	3.19e-06	14306	0.00152812	21.8916	family Family XI id.1936	ebi-a-GCST90016938		-0.0007	0.0269	0.9799	104247	3011	finn-b-O15_MEMBR_PREMAT_RUPT
392	rs78222136	G	C	0.224835	0.0511672	8.41e-06	14306	0.00134785	19.3056	family Family XI id.1936	ebi-a-GCST90016938		0.022	0.0472	0.6421	104247	3011	finn-b-O15_MEMBR_PREMAT_RUPT
393	rs10404377	A	C	0.0503183	0.011165	6.99e-06	14306	0.00141775	20.3083	family Family XIII id.1957	ebi-a-GCST90016939		-0.0568	0.0275	0.0390904	104247	3011	finn-b-O15_MEMBR_PREMAT_RUPT
394	rs118170811	A	G	0.151619	0.0317112	1.8e-06	14306	0.0015954	22.8571	family Family XIII id.1957	ebi-a-GCST90016939		0.0055	0.0778	0.9439	104247	3011	finn-b-O15_MEMBR_PREMAT_RUPT
395	rs12643275	A	T	-0.0550907	0.0116474	2.42e-06	14306	0.00156135	22.3686	family Family XIII id.1957	ebi-a-GCST90016939		-0.0759	0.029	0.00889406	104247	3011	finn-b-O15_MEMBR_PREMAT_RUPT
396	rs12904405	A	G	-0.0851896	0.0192688	7.67e-06	14306	0.00136443	19.5435	family Family XIII id.1957	ebi-a-GCST90016939		-0.0184	0.0456	0.6868	104247	3011	finn-b-O15_MEMBR_PREMAT_RUPT
397	rs1999289	A	T	-0.0637366	0.013927	2.54e-06	14306	0.00146187	20.9412	family Family XIII id.1957	ebi-a-GCST90016939		0.0391	0.0318	0.2197	104247	3011	finn-b-O15_MEMBR_PREMAT_RUPT
398	rs3098182	T	G	-0.0508511	0.011014	4.04e-06	14306	0.0014878	21.3133	family Family XIII id.1957	ebi-a-GCST90016939		0.0202	0.0267	0.4494	104247	3011	finn-b-O15_MEMBR_PREMAT_RUPT
399	rs482905	G	T	0.0596528	0.012717	3.72e-06	14306	0.0015357	22.0005	family Family XIII id.1957	ebi-a-GCST90016939		-0.0181	0.0309	0.5589	104247	3011	finn-b-O15_MEMBR_PREMAT_RUPT
400	rs6501525	A	G	0.0561559	0.0115587	1.24e-06	14306	0.00164717	23.6	family Family XIII id.1957	ebi-a-GCST90016939		-0.0298	0.0283	0.2912	104247	3011	finn-b-O15_MEMBR_PREMAT_RUPT
401	rs66753613	G	A	0.0651136	0.0144251	8.08e-06	14306	0.00142223	20.3725	family Family XIII id.1957	ebi-a-GCST90016939		0.0073	0.0345	0.8324	104247	3011	finn-b-O15_MEMBR_PREMAT_RUPT
402	rs6797051	C	T	-0.0805985	0.0171364	4.89e-06	14306	0.00154392	22.1184	family Family XIII id.1957	ebi-a-GCST90016939		0.0181	0.0456	0.692201	104247	3011	finn-b-O15_MEMBR_PREMAT_RUPT
403	rs7076829	T	A	-0.0516394	0.0112313	4.76e-06	14306	0.00147551	21.1369	family Family XIII id.1957	ebi-a-GCST90016939		0.0339	0.0279	0.2244	104247	3011	finn-b-O15_MEMBR_PREMAT_RUPT
404	rs7514702	T	C	-0.0663236	0.0141626	3.92e-06	14306	0.00153062	21.9275	family Family XIII id.1957	ebi-a-GCST90016939		0.0129	0.0371	0.727699	104247	3011	finn-b-O15_MEMBR_PREMAT_RUPT
405	rs10402491	C	T	0.0661701	0.014851	7.58e-06	14306	0.00138577	19.8496	family Lachnospiraceae id.1987	ebi-a-GCST90016940		-0.0197	0.0358	0.5835	104247	3011	finn-b-O15_MEMBR_PREMAT_RUPT
406	rs11139361	C	T	-0.0494463	0.0110503	4.26e-06	14306	0.00139763	20.0198	family Lachnospiraceae id.1987	ebi-a-GCST90016940		0.006	0.0285	0.834	104247	3011	finn-b-O15_MEMBR_PREMAT_RUPT
407	rs112040820	A	G	0.0549584	0.0117086	2.42e-06	14306	0.0015377	22.0291	family Lachnospiraceae id.1987	ebi-a-GCST90016940		-0.0463	0.0306	0.1309	104247	3011	finn-b-O15_MEMBR_PREMAT_RUPT
408	rs11755180	C	G	-0.049227	0.0104894	2.69e-06	14306	0.00153716	22.0214	family Lachnospiraceae id.1987	ebi-a-GCST90016940		0.0099	0.0268	0.7117	104247	3011	finn-b-O15_MEMBR_PREMAT_RUPT
409	rs11841382	G	T	-0.0718128	0.017462	9.58e-06	14306	0.00118082	16.9104	family Lachnospiraceae id.1987	ebi-a-GCST90016940		0.0849	0.0484	0.0792903	104247	3011	finn-b-O15_MEMBR_PREMAT_RUPT
410	rs11979110	T	C	-0.0500924	0.0105069	1.82e-06	14306	0.00158631	22.7266	family Lachnospiraceae id.1987	ebi-a-GCST90016940		0.0396	0.0267	0.1383	104247	3011	finn-b-O15_MEMBR_PREMAT_RUPT
411	rs1205443	A	G	0.0501415	0.0112157	7.29e-06	14306	0.00139514	19.9839	family Lachnospiraceae id.1987	ebi-a-GCST90016940		-0.0476	0.0281	0.0908092	104247	3011	finn-b-O15_MEMBR_PREMAT_RUPT
412	rs12760724	A	C	-0.0484566	0.0107934	7.27e-06	14306	0.00140689	20.1525	family Lachnospiraceae id.1987	ebi-a-GCST90016940		0.0077	0.0284	0.786001	104247	3011	finn-b-O15_MEMBR_PREMAT_RUPT
413	rs13005175	G	A	-0.0993483	0.0218395	8.37e-06	14306	0.00144441	20.6907	family Lachnospiraceae id.1987	ebi-a-GCST90016940		-0.0286	0.0651	0.6605	104247	3011	finn-b-O15_MEMBR_PREMAT_RUPT
414	rs2159863	A	G	-0.0585831	0.0128742	3.7e-06	14306	0.0014453	20.7035	family Lachnospiraceae id.1987	ebi-a-GCST90016940		-0.0334	0.0347	0.3356	104247	3011	finn-b-O15_MEMBR_PREMAT_RUPT
415	rs2910921	C	T	-0.160302	0.035832	8.42e-06	14306	0.00139704	20.0113	family Lachnospiraceae id.1987	ebi-a-GCST90016940		-0.0477	0.0795	0.548001	104247	3011	finn-b-O15_MEMBR_PREMAT_RUPT
416	rs3127230	C	T	-0.0503537	0.0112201	6.2e-06	14306	0.00140585	20.1376	family Lachnospiraceae id.1987	ebi-a-GCST90016940		-0.0137	0.0292	0.6384	104247	3011	finn-b-O15_MEMBR_PREMAT_RUPT
417	rs35524804	T	C	-0.0607481	0.0125216	2.45e-06	14306	0.00164253	23.5334	family Lachnospiraceae id.1987	ebi-a-GCST90016940		0.0594	0.0325	0.0674606	104247	3011	finn-b-O15_MEMBR_PREMAT_RUPT
418	rs7359994	C	T	0.0503142	0.0112482	5.36e-06	14306	0.00139666	20.0057	family Lachnospiraceae id.1987	ebi-a-GCST90016940		-0.009	0.0271	0.740901	104247	3011	finn-b-O15_MEMBR_PREMAT_RUPT
419	rs79086868	T	C	0.0776723	0.0164472	3.01e-06	14306	0.00155652	22.2991	family Lachnospiraceae id.1987	ebi-a-GCST90016940		0.0855	0.0446	0.0551099	104247	3011	finn-b-O15_MEMBR_PREMAT_RUPT
420	rs959845	T	C	0.0493666	0.0107801	5.17e-06	14306	0.00146375	20.9682	family Lachnospiraceae id.1987	ebi-a-GCST90016940		0.02	0.0275	0.4673	104247	3011	finn-b-O15_MEMBR_PREMAT_RUPT
421	rs9929145	G	A	-0.125721	0.0245233	2.84e-07	14306	0.00183376	26.2783	family Lachnospiraceae id.1987	ebi-a-GCST90016940		-0.1581	0.0625	0.01137	104247	3011	finn-b-O15_MEMBR_PREMAT_RUPT
422	rs1530559	G	A	0.0772453	0.0176921	9.65e-06	14306	0.00133073	19.0601	family Lactobacillaceae id.1836	ebi-a-GCST90016941		0.0086	0.027	0.75	104247	3011	finn-b-O15_MEMBR_PREMAT_RUPT
423	rs1590596	C	G	-0.10381	0.0220135	3.9e-06	14306	0.00155206	22.2351	family Lactobacillaceae id.1836	ebi-a-GCST90016941		-0.0462	0.0368	0.2087	104247	3011	finn-b-O15_MEMBR_PREMAT_RUPT
424	rs16861661	G	A	-0.193287	0.0379293	2.7e-07	14306	0.00181197	25.9654	family Lactobacillaceae id.1836	ebi-a-GCST90016941		-0.0318	0.0537	0.554	104247	3011	finn-b-O15_MEMBR_PREMAT_RUPT
425	rs328312	T	A	0.082529	0.0168225	8.69e-07	14306	0.00167951	24.0642	family Lactobacillaceae id.1836	ebi-a-GCST90016941		-0.0178	0.0268	0.507	104247	3011	finn-b-O15_MEMBR_PREMAT_RUPT
426	rs6092149	A	T	-0.0825646	0.0170282	1.38e-06	14306	0.00164066	23.5066	family Lactobacillaceae id.1836	ebi-a-GCST90016941		0.0673	0.0272	0.0131999	104247	3011	finn-b-O15_MEMBR_PREMAT_RUPT
427	rs62314653	C	A	0.177082	0.0392269	6.59e-06	14306	0.00142247	20.3761	family Lactobacillaceae id.1836	ebi-a-GCST90016941		0.1018	0.0569	0.07358	104247	3011	finn-b-O15_MEMBR_PREMAT_RUPT
428	rs74599091	A	G	0.191613	0.0425039	7.7e-06	14306	0.00141859	20.3204	family Lactobacillaceae id.1836	ebi-a-GCST90016941		-0.1552	0.0994	0.1185	104247	3011	finn-b-O15_MEMBR_PREMAT_RUPT
429	rs768253	T	G	-0.0792344	0.0170604	3.61e-06	14306	0.00150549	21.5669	family Lactobacillaceae id.1836	ebi-a-GCST90016941		0.0151	0.0269	0.575	104247	3011	finn-b-O15_MEMBR_PREMAT_RUPT
430	rs77478751	A	G	-0.219178	0.0473566	5.96e-06	14306	0.00149508	21.4177	family Lactobacillaceae id.1836	ebi-a-GCST90016941		-0.0375	0.042	0.3728	104247	3011	finn-b-O15_MEMBR_PREMAT_RUPT
431	rs921925	A	C	0.0999419	0.0201687	5.77e-07	14306	0.00171347	24.5515	family Lactobacillaceae id.1836	ebi-a-GCST90016941		-0.0043	0.0327	0.8951	104247	3011	finn-b-O15_MEMBR_PREMAT_RUPT
432	rs9345899	A	G	-0.124042	0.0278946	9.45e-06	14306	0.00138032	19.7714	family Lactobacillaceae id.1836	ebi-a-GCST90016941		0.0301	0.0438	0.492	104247	3011	finn-b-O15_MEMBR_PREMAT_RUPT
433	rs10202904	G	T	0.121754	0.0235357	3.01e-07	14306	0.00186716	26.7579	family Methanobacteriaceae id.121	ebi-a-GCST90016942		0.0096	0.0272	0.724201	104247	3011	finn-b-O15_MEMBR_PREMAT_RUPT
434	rs10424197	A	G	0.111274	0.0247517	9.28e-06	14306	0.00141074	20.2077	family Methanobacteriaceae id.121	ebi-a-GCST90016942		-0.0125	0.0308	0.6853	104247	3011	finn-b-O15_MEMBR_PREMAT_RUPT
435	rs11018665	A	T	0.111465	0.0250516	6.52e-06	14306	0.00138193	19.7945	family Methanobacteriaceae id.121	ebi-a-GCST90016942		0.0359	0.0312	0.2497	104247	3011	finn-b-O15_MEMBR_PREMAT_RUPT
436	rs12825290	C	G	-0.216781	0.0493496	6.08e-06	14306	0.00134701	19.2937	family Methanobacteriaceae id.121	ebi-a-GCST90016942		-0.0608	0.0555	0.2731	104247	3011	finn-b-O15_MEMBR_PREMAT_RUPT
437	rs4257531	G	A	0.164498	0.0364959	7.44e-06	14306	0.00141807	20.3129	family Methanobacteriaceae id.121	ebi-a-GCST90016942		-0.0485	0.0438	0.2683	104247	3011	finn-b-O15_MEMBR_PREMAT_RUPT
438	rs56131665	G	A	0.178661	0.039298	6.18e-06	14306	0.00144269	20.6661	family Methanobacteriaceae id.121	ebi-a-GCST90016942		-0.0075	0.0428	0.8602	104247	3011	finn-b-O15_MEMBR_PREMAT_RUPT
439	rs6508769	C	T	-0.153519	0.0344519	8.23e-06	14306	0.00138605	19.8535	family Methanobacteriaceae id.121	ebi-a-GCST90016942		-0.0004	0.0378	0.991	104247	3011	finn-b-O15_MEMBR_PREMAT_RUPT
440	rs6776814	T	C	-0.199566	0.0411825	1.63e-06	14306	0.00163877	23.4794	family Methanobacteriaceae id.121	ebi-a-GCST90016942		-0.1228	0.0937	0.1899	104247	3011	finn-b-O15_MEMBR_PREMAT_RUPT
441	rs73068003	G	T	-0.15814	0.0351803	8.45e-06	14306	0.00141044	20.2034	family Methanobacteriaceae id.121	ebi-a-GCST90016942		-0.0371	0.0452	0.4123	104247	3011	finn-b-O15_MEMBR_PREMAT_RUPT
442	rs73457410	A	G	0.21534	0.0436695	1.41e-06	14306	0.00169683	24.3126	family Methanobacteriaceae id.121	ebi-a-GCST90016942		-0.1232	0.0547	0.0243299	104247	3011	finn-b-O15_MEMBR_PREMAT_RUPT
443	rs75208022	C	T	-0.227245	0.048763	5.92e-06	14306	0.00151576	21.7144	family Methanobacteriaceae id.121	ebi-a-GCST90016942		0.0352	0.0461	0.4452	104247	3011	finn-b-O15_MEMBR_PREMAT_RUPT
444	rs894996	C	A	0.216999	0.0449076	1.88e-06	14306	0.00162948	23.3461	family Methanobacteriaceae id.121	ebi-a-GCST90016942		-0.0565	0.0525	0.2826	104247	3011	finn-b-O15_MEMBR_PREMAT_RUPT
445	rs111966731	T	C	0.204031	0.0445746	4.56e-06	14306	0.00146239	20.9487	family Oxalobacteraceae id.2966	ebi-a-GCST90016943		0.0039	0.0474	0.9343	104247	3011	finn-b-O15_MEMBR_PREMAT_RUPT
446	rs11246212	C	T	-0.13607	0.0291797	4.51e-06	14306	0.0015177	21.7421	family Oxalobacteraceae id.2966	ebi-a-GCST90016943		0.0011	0.0386	0.9762	104247	3011	finn-b-O15_MEMBR_PREMAT_RUPT
447	rs12002250	A	C	0.196145	0.044523	5.53e-06	14306	0.00135481	19.4055	family Oxalobacteraceae id.2966	ebi-a-GCST90016943		0.0404	0.0668	0.5452	104247	3011	finn-b-O15_MEMBR_PREMAT_RUPT
448	rs12509763	C	G	-0.16332	0.0360823	8.05e-06	14306	0.00143005	20.4847	family Oxalobacteraceae id.2966	ebi-a-GCST90016943		-0.0562	0.0457	0.2183	104247	3011	finn-b-O15_MEMBR_PREMAT_RUPT
449	rs1569853	T	C	-0.140043	0.0281704	7.45e-07	14306	0.00172452	24.7102	family Oxalobacteraceae id.2966	ebi-a-GCST90016943		-0.0128	0.0409	0.7539	104247	3011	finn-b-O15_MEMBR_PREMAT_RUPT
450	rs17138946	G	T	-0.189444	0.0430248	8.09e-06	14306	0.00135337	19.3849	family Oxalobacteraceae id.2966	ebi-a-GCST90016943		-0.0473	0.0534	0.3754	104247	3011	finn-b-O15_MEMBR_PREMAT_RUPT
451	rs36057338	G	T	0.181604	0.0398742	6.26e-06	14306	0.00144784	20.7399	family Oxalobacteraceae id.2966	ebi-a-GCST90016943		0.0579	0.0738	0.4327	104247	3011	finn-b-O15_MEMBR_PREMAT_RUPT
452	rs4428215	G	A	0.12561	0.0230053	4.88e-08	14306	0.00207955	29.8079	family Oxalobacteraceae id.2966	ebi-a-GCST90016943		-0.0415	0.0307	0.1769	104247	3011	finn-b-O15_MEMBR_PREMAT_RUPT
453	rs561239	A	G	0.105525	0.0236769	7.19e-06	14306	0.00138656	19.861	family Oxalobacteraceae id.2966	ebi-a-GCST90016943		-0.0058	0.033	0.8613	104247	3011	finn-b-O15_MEMBR_PREMAT_RUPT
454	rs6000536	C	T	-0.118383	0.0241355	7.39e-07	14306	0.00167887	24.055	family Oxalobacteraceae id.2966	ebi-a-GCST90016943		0.0658	0.0356	0.0645298	104247	3011	finn-b-O15_MEMBR_PREMAT_RUPT
455	rs62435498	C	A	0.181521	0.0400608	7.46e-06	14306	0.00143309	20.5283	family Oxalobacteraceae id.2966	ebi-a-GCST90016943		-0.0607	0.0441	0.1687	104247	3011	finn-b-O15_MEMBR_PREMAT_RUPT
456	rs736744	T	C	-0.105642	0.0200648	1.49e-07	14306	0.00193395	27.7168	family Oxalobacteraceae id.2966	ebi-a-GCST90016943		0.0414	0.0269	0.1244	104247	3011	finn-b-O15_MEMBR_PREMAT_RUPT
457	rs7993559	A	C	-0.0921059	0.0201114	5.04e-06	14306	0.00146398	20.9715	family Oxalobacteraceae id.2966	ebi-a-GCST90016943		-0.0118	0.0272	0.6645	104247	3011	finn-b-O15_MEMBR_PREMAT_RUPT
458	rs80330081	A	C	-0.18756	0.0423688	6.64e-06	14306	0.00136797	19.5942	family Oxalobacteraceae id.2966	ebi-a-GCST90016943		-0.0346	0.0439	0.4307	104247	3011	finn-b-O15_MEMBR_PREMAT_RUPT
459	rs934049	G	A	0.109751	0.0238636	4.21e-06	14306	0.00147634	21.1487	family Oxalobacteraceae id.2966	ebi-a-GCST90016943		0.0445	0.033	0.1767	104247	3011	finn-b-O15_MEMBR_PREMAT_RUPT
460	rs10840326	C	G	-0.0717634	0.0149229	1.44e-06	14306	0.00161391	23.1227	family Pasteurellaceae id.3689	ebi-a-GCST90016944		0.0062	0.0278	0.8243	104247	3011	finn-b-O15_MEMBR_PREMAT_RUPT
461	rs10965428	C	A	-0.119902	0.0258219	4.29e-06	14306	0.00150489	21.5584	family Pasteurellaceae id.3689	ebi-a-GCST90016944		-0.0833	0.0581	0.1514	104247	3011	finn-b-O15_MEMBR_PREMAT_RUPT
462	rs111582866	G	A	-0.113957	0.0256403	7.07e-06	14306	0.00137885	19.7504	family Pasteurellaceae id.3689	ebi-a-GCST90016944		-0.0761	0.0478	0.1114	104247	3011	finn-b-O15_MEMBR_PREMAT_RUPT
463	rs12050685	A	G	-0.0670948	0.015239	9.19e-06	14306	0.00135319	19.3822	family Pasteurellaceae id.3689	ebi-a-GCST90016944		0.0092	0.0297	0.756401	104247	3011	finn-b-O15_MEMBR_PREMAT_RUPT
464	rs12191680	C	G	0.102214	0.0197189	3.05e-07	14306	0.00187466	26.8655	family Pasteurellaceae id.3689	ebi-a-GCST90016944		-0.0003	0.0444	0.9952	104247	3011	finn-b-O15_MEMBR_PREMAT_RUPT
465	rs16970009	A	G	0.187381	0.0429572	7.32e-06	14306	0.00132826	19.0247	family Pasteurellaceae id.3689	ebi-a-GCST90016944		-0.0989	0.0931	0.2883	104247	3011	finn-b-O15_MEMBR_PREMAT_RUPT
466	rs35510	A	G	0.122729	0.0264958	4.02e-06	14306	0.00149752	21.4526	family Pasteurellaceae id.3689	ebi-a-GCST90016944		-0.0303	0.0672	0.6521	104247	3011	finn-b-O15_MEMBR_PREMAT_RUPT
467	rs4822728	T	C	0.0685479	0.0149032	4.72e-06	14306	0.00147662	21.1528	family Pasteurellaceae id.3689	ebi-a-GCST90016944		0.0168	0.0267	0.5283	104247	3011	finn-b-O15_MEMBR_PREMAT_RUPT
468	rs6092684	A	T	0.0684647	0.014674	3.44e-06	14306	0.00151935	21.7659	family Pasteurellaceae id.3689	ebi-a-GCST90016944		-0.071	0.0271	0.00876294	104247	3011	finn-b-O15_MEMBR_PREMAT_RUPT
469	rs62568866	T	A	-0.118018	0.0259206	7.23e-06	14306	0.00144697	20.7274	family Pasteurellaceae id.3689	ebi-a-GCST90016944		0.0811	0.0432	0.0602907	104247	3011	finn-b-O15_MEMBR_PREMAT_RUPT
470	rs6972479	A	G	-0.0781862	0.0175366	7.75e-06	14306	0.00138755	19.8751	family Pasteurellaceae id.3689	ebi-a-GCST90016944		0.0264	0.0333	0.4278	104247	3011	finn-b-O15_MEMBR_PREMAT_RUPT
471	rs72756943	G	A	0.13988	0.0303029	3.35e-06	14306	0.00148723	21.305	family Pasteurellaceae id.3689	ebi-a-GCST90016944		-0.0299	0.0545	0.5829	104247	3011	finn-b-O15_MEMBR_PREMAT_RUPT
472	rs73139353	A	C	-0.222573	0.0484634	8.71e-06	14306	0.00147217	21.089	family Pasteurellaceae id.3689	ebi-a-GCST90016944		-0.0079	0.0475	0.8672	104247	3011	finn-b-O15_MEMBR_PREMAT_RUPT
473	rs731534	C	G	-0.0986502	0.0216316	9.46e-06	14306	0.00145167	20.795	family Pasteurellaceae id.3689	ebi-a-GCST90016944		-0.081	0.0424	0.0561694	104247	3011	finn-b-O15_MEMBR_PREMAT_RUPT
474	rs76022354	C	T	0.24289	0.0500406	1.83e-06	14306	0.00164415	23.5567	family Pasteurellaceae id.3689	ebi-a-GCST90016944		-0.0417	0.062	0.5011	104247	3011	finn-b-O15_MEMBR_PREMAT_RUPT
475	rs78909003	T	C	-0.241159	0.0498372	2.05e-06	14306	0.00163407	23.412	family Pasteurellaceae id.3689	ebi-a-GCST90016944		0.0042	0.059	0.9437	104247	3011	finn-b-O15_MEMBR_PREMAT_RUPT
476	rs9382510	C	T	-0.0881865	0.0169965	2.48e-07	14306	0.00187824	26.9169	family Pasteurellaceae id.3689	ebi-a-GCST90016944		0.0482	0.0302	0.1105	104247	3011	finn-b-O15_MEMBR_PREMAT_RUPT
477	rs9895850	T	C	-0.176406	0.041017	9.08e-06	14306	0.00129128	18.4943	family Pasteurellaceae id.3689	ebi-a-GCST90016944		-0.0505	0.0655	0.4405	104247	3011	finn-b-O15_MEMBR_PREMAT_RUPT
478	rs9938097	C	T	0.0710386	0.0158024	8.23e-06	14306	0.00141062	20.2061	family Pasteurellaceae id.3689	ebi-a-GCST90016944		0.0141	0.0275	0.6092	104247	3011	finn-b-O15_MEMBR_PREMAT_RUPT
479	rs117452796	A	G	-0.257982	0.0549569	3.15e-06	14306	0.00153797	22.033	family Peptococcaceae id.2024	ebi-a-GCST90016945		0.1153	0.076	0.1294	104247	3011	finn-b-O15_MEMBR_PREMAT_RUPT
480	rs12144792	C	T	0.064399	0.0141246	5.82e-06	14306	0.00145097	20.7848	family Peptococcaceae id.2024	ebi-a-GCST90016945		0.0125	0.0276	0.6505	104247	3011	finn-b-O15_MEMBR_PREMAT_RUPT
481	rs12634826	T	G	-0.0739885	0.0150931	1.01e-06	14306	0.00167697	24.0276	family Peptococcaceae id.2024	ebi-a-GCST90016945		0.015	0.028	0.5921	104247	3011	finn-b-O15_MEMBR_PREMAT_RUPT
482	rs12992764	T	G	0.0684213	0.0141137	1.46e-06	14306	0.0016401	23.4985	family Peptococcaceae id.2024	ebi-a-GCST90016945		-0.0033	0.0271	0.9039	104247	3011	finn-b-O15_MEMBR_PREMAT_RUPT
483	rs150600492	A	C	0.135774	0.0289757	2.31e-06	14306	0.00153243	21.9535	family Peptococcaceae id.2024	ebi-a-GCST90016945		0.0785	0.0578	0.1745	104247	3011	finn-b-O15_MEMBR_PREMAT_RUPT
484	rs35703006	G	T	0.0812655	0.0164355	4.95e-07	14306	0.00170603	24.4448	family Peptococcaceae id.2024	ebi-a-GCST90016945		-0.0259	0.031	0.4029	104247	3011	finn-b-O15_MEMBR_PREMAT_RUPT
485	rs4990837	G	A	-0.0910387	0.0185869	1.74e-06	14306	0.00167414	23.9871	family Peptococcaceae id.2024	ebi-a-GCST90016945		0.0016	0.0337	0.9614	104247	3011	finn-b-O15_MEMBR_PREMAT_RUPT
486	rs75430375	C	T	-0.147941	0.0317498	3.41e-06	14306	0.00151537	21.7087	family Peptococcaceae id.2024	ebi-a-GCST90016945		0.0926	0.0644	0.1502	104247	3011	finn-b-O15_MEMBR_PREMAT_RUPT
487	rs75898026	A	G	-0.0821779	0.0173541	2.02e-06	14306	0.00156497	22.4205	family Peptococcaceae id.2024	ebi-a-GCST90016945		-0.0241	0.0332	0.468	104247	3011	finn-b-O15_MEMBR_PREMAT_RUPT
488	rs10805326	A	G	-0.0566637	0.012276	4.03e-06	14306	0.00148707	21.3027	family Peptostreptococcaceae id.2042	ebi-a-GCST90016946		-0.0255	0.0293	0.3846	104247	3011	finn-b-O15_MEMBR_PREMAT_RUPT
489	rs10805326	A	G	-0.0566637	0.012276	4.03e-06	14306	0.00148707	21.3027	family Peptostreptococcaceae id.2042	ebi-a-GCST90016946		0.0972	0.2565	0.7048	104247	3011	finn-b-O15_MEMBR_PREMAT_RUPT
490	rs117020988	C	T	0.182411	0.0372126	1.03e-06	14306	0.00167678	24.0249	family Peptostreptococcaceae id.2042	ebi-a-GCST90016946		0.0362	0.0488	0.4591	104247	3011	finn-b-O15_MEMBR_PREMAT_RUPT
491	rs12377846	C	A	-0.252	0.0511627	7.26e-07	14306	0.00169293	24.2568	family Peptostreptococcaceae id.2042	ebi-a-GCST90016946		-0.0878	0.0792	0.2672	104247	3011	finn-b-O15_MEMBR_PREMAT_RUPT
492	rs12986312	T	G	0.0571818	0.0125947	5.77e-06	14306	0.00143879	20.6101	family Peptostreptococcaceae id.2042	ebi-a-GCST90016946		-0.002	0.0291	0.9463	104247	3011	finn-b-O15_MEMBR_PREMAT_RUPT
493	rs1467258	G	A	0.072584	0.0162321	7.9e-06	14306	0.00139575	19.9927	family Peptostreptococcaceae id.2042	ebi-a-GCST90016946		0.0024	0.0344	0.9449	104247	3011	finn-b-O15_MEMBR_PREMAT_RUPT
494	rs1520207	T	C	-0.0525658	0.0112476	3.17e-06	14306	0.00152443	21.8387	family Peptostreptococcaceae id.2042	ebi-a-GCST90016946		0.0186	0.0267	0.4849	104247	3011	finn-b-O15_MEMBR_PREMAT_RUPT
495	rs2644627	C	G	-0.0558506	0.011224	6.33e-07	14306	0.00172779	24.7571	family Peptostreptococcaceae id.2042	ebi-a-GCST90016946		0.032	0.027	0.236	104247	3011	finn-b-O15_MEMBR_PREMAT_RUPT
496	rs4692811	C	T	0.0642075	0.0126913	4.21e-07	14306	0.00178593	25.5917	family Peptostreptococcaceae id.2042	ebi-a-GCST90016946		-0.0387	0.0282	0.1702	104247	3011	finn-b-O15_MEMBR_PREMAT_RUPT
497	rs59865771	C	T	-0.0573764	0.0127192	7.69e-06	14306	0.0014204	20.3463	family Peptostreptococcaceae id.2042	ebi-a-GCST90016946		0.0108	0.0282	0.6999	104247	3011	finn-b-O15_MEMBR_PREMAT_RUPT
498	rs61841503	G	A	0.0919658	0.0161331	9.8e-09	14306	0.00226628	32.4905	family Peptostreptococcaceae id.2042	ebi-a-GCST90016946		0.0002	0.0398	0.9959	104247	3011	finn-b-O15_MEMBR_PREMAT_RUPT
499	rs6721459	G	A	-0.0509823	0.0111975	5.08e-06	14306	0.00144694	20.727	family Peptostreptococcaceae id.2042	ebi-a-GCST90016946		-0.0185	0.0272	0.4964	104247	3011	finn-b-O15_MEMBR_PREMAT_RUPT
500	rs75819860	T	A	0.126264	0.0268383	2.49e-06	14306	0.00154475	22.1304	family Peptostreptococcaceae id.2042	ebi-a-GCST90016946		-0.0592	0.0436	0.1745	104247	3011	finn-b-O15_MEMBR_PREMAT_RUPT
501	rs76982728	T	C	0.124203	0.0266923	3.24e-06	14306	0.00151118	21.6487	family Peptostreptococcaceae id.2042	ebi-a-GCST90016946		-0.0868	0.0932	0.3513	104247	3011	finn-b-O15_MEMBR_PREMAT_RUPT
502	rs77540684	T	G	0.106725	0.0245638	8.14e-06	14306	0.0013178	18.8747	family Peptostreptococcaceae id.2042	ebi-a-GCST90016946		0.0255	0.0454	0.5748	104247	3011	finn-b-O15_MEMBR_PREMAT_RUPT
503	rs9573937	A	G	-0.0693637	0.0142907	1.71e-06	14306	0.00164409	23.5557	family Peptostreptococcaceae id.2042	ebi-a-GCST90016946		0.0168	0.0359	0.639	104247	3011	finn-b-O15_MEMBR_PREMAT_RUPT
504	rs10119172	C	G	-0.0737324	0.014259	1.32e-07	14306	0.00186556	26.7349	family Porphyromonadaceae id.943	ebi-a-GCST90016947		-0.0368	0.035	0.2923	104247	3011	finn-b-O15_MEMBR_PREMAT_RUPT
505	rs10762312	A	G	0.052368	0.0118814	8.7e-06	14306	0.00135609	19.4239	family Porphyromonadaceae id.943	ebi-a-GCST90016947		0.0261	0.0289	0.3674	104247	3011	finn-b-O15_MEMBR_PREMAT_RUPT
506	rs10858364	G	T	0.055316	0.012085	4.31e-06	14306	0.00146236	20.9482	family Porphyromonadaceae id.943	ebi-a-GCST90016947		0.0249	0.0317	0.4312	104247	3011	finn-b-O15_MEMBR_PREMAT_RUPT
507	rs17065783	A	G	-0.059133	0.0122235	1.79e-06	14306	0.0016332	23.3996	family Porphyromonadaceae id.943	ebi-a-GCST90016947		-0.0498	0.0367	0.1745	104247	3011	finn-b-O15_MEMBR_PREMAT_RUPT
508	rs1980561	A	G	-0.0485289	0.0109284	8.95e-06	14306	0.00137648	19.7164	family Porphyromonadaceae id.943	ebi-a-GCST90016947		0.0202	0.0267	0.449	104247	3011	finn-b-O15_MEMBR_PREMAT_RUPT
509	rs3111851	G	C	-0.0581896	0.0121147	2.19e-06	14306	0.00161008	23.0677	family Porphyromonadaceae id.943	ebi-a-GCST90016947		-0.0234	0.0305	0.4434	104247	3011	finn-b-O15_MEMBR_PREMAT_RUPT
510	rs35233670	T	C	-0.0473576	0.010602	7.91e-06	14306	0.00139277	19.95	family Porphyromonadaceae id.943	ebi-a-GCST90016947		-0.003	0.0266	0.9098	104247	3011	finn-b-O15_MEMBR_PREMAT_RUPT
511	rs35961441	A	C	0.0915257	0.0207306	8.37e-06	14306	0.00136067	19.4895	family Porphyromonadaceae id.943	ebi-a-GCST90016947		0.0626	0.0706	0.3749	104247	3011	finn-b-O15_MEMBR_PREMAT_RUPT
512	rs6953849	A	G	0.0718149	0.0150724	2.44e-06	14306	0.00158437	22.6988	family Porphyromonadaceae id.943	ebi-a-GCST90016947		-0.0139	0.0348	0.6883	104247	3011	finn-b-O15_MEMBR_PREMAT_RUPT
513	rs7330827	T	C	-0.103842	0.0237355	8.05e-06	14306	0.00133614	19.1376	family Porphyromonadaceae id.943	ebi-a-GCST90016947		0.0065	0.056	0.9076	104247	3011	finn-b-O15_MEMBR_PREMAT_RUPT
514	rs864093	A	C	-0.0527939	0.0117499	9.6e-06	14306	0.00140919	20.1854	family Porphyromonadaceae id.943	ebi-a-GCST90016947		-0.0062	0.0328	0.8491	104247	3011	finn-b-O15_MEMBR_PREMAT_RUPT
515	rs10131942	C	G	0.0701212	0.0158326	8.61e-06	14306	0.00136924	19.6125	family Prevotellaceae id.960	ebi-a-GCST90016948		-0.006	0.036	0.8671	104247	3011	finn-b-O15_MEMBR_PREMAT_RUPT
516	rs12057990	C	T	0.0589878	0.0132268	8.97e-06	14306	0.00138833	19.8863	family Prevotellaceae id.960	ebi-a-GCST90016948		0.0177	0.0301	0.5549	104247	3011	finn-b-O15_MEMBR_PREMAT_RUPT
517	rs12118202	T	C	-0.0751986	0.0147265	5.54e-07	14306	0.00181933	26.0711	family Prevotellaceae id.960	ebi-a-GCST90016948		-0.0096	0.0346	0.7817	104247	3011	finn-b-O15_MEMBR_PREMAT_RUPT
518	rs13069367	A	C	-0.0539768	0.0119687	7.39e-06	14306	0.00141966	20.3357	family Prevotellaceae id.960	ebi-a-GCST90016948		0.0023	0.0271	0.9321	104247	3011	finn-b-O15_MEMBR_PREMAT_RUPT
519	rs148376875	T	G	0.084515	0.0179163	2.08e-06	14306	0.00155302	22.249	family Prevotellaceae id.960	ebi-a-GCST90016948		-0.0461	0.0372	0.2157	104247	3011	finn-b-O15_MEMBR_PREMAT_RUPT
520	rs2206482	T	G	-0.0569105	0.0117486	1.3e-06	14306	0.00163751	23.4613	family Prevotellaceae id.960	ebi-a-GCST90016948		0.0349	0.0273	0.2003	104247	3011	finn-b-O15_MEMBR_PREMAT_RUPT
521	rs2278540	G	A	0.0554249	0.0123265	8.44e-06	14306	0.00141123	20.2148	family Prevotellaceae id.960	ebi-a-GCST90016948		0.0198	0.0278	0.4752	104247	3011	finn-b-O15_MEMBR_PREMAT_RUPT
522	rs34071565	T	A	-0.1567	0.0347882	5.6e-06	14306	0.00141625	20.2868	family Prevotellaceae id.960	ebi-a-GCST90016948		-0.0174	0.0554	0.753	104247	3011	finn-b-O15_MEMBR_PREMAT_RUPT
523	rs34660375	A	G	-0.0805894	0.0178291	7.4e-06	14306	0.00142613	20.4285	family Prevotellaceae id.960	ebi-a-GCST90016948		0.0284	0.0379	0.4533	104247	3011	finn-b-O15_MEMBR_PREMAT_RUPT
524	rs3758087	C	T	-0.0564199	0.0124655	8.61e-06	14306	0.0014299	20.4826	family Prevotellaceae id.960	ebi-a-GCST90016948		0.0292	0.0297	0.3259	104247	3011	finn-b-O15_MEMBR_PREMAT_RUPT
525	rs3860225	A	G	0.083936	0.0167936	5.5e-07	14306	0.00174314	24.9775	family Prevotellaceae id.960	ebi-a-GCST90016948		0.0069	0.0467	0.8832	104247	3011	finn-b-O15_MEMBR_PREMAT_RUPT
526	rs4493272	T	C	-0.0604992	0.0118027	3.02e-07	14306	0.00183325	26.271	family Prevotellaceae id.960	ebi-a-GCST90016948		0.0147	0.0268	0.584	104247	3011	finn-b-O15_MEMBR_PREMAT_RUPT
527	rs4685827	T	C	-0.0679529	0.0145407	2.77e-06	14306	0.00152428	21.8366	family Prevotellaceae id.960	ebi-a-GCST90016948		0.0008	0.0312	0.9805	104247	3011	finn-b-O15_MEMBR_PREMAT_RUPT
528	rs7252711	G	A	0.0740876	0.0161926	5.57e-06	14306	0.00146118	20.9313	family Prevotellaceae id.960	ebi-a-GCST90016948		0.0374	0.0428	0.3825	104247	3011	finn-b-O15_MEMBR_PREMAT_RUPT
529	rs7975087	C	A	-0.0601448	0.0135454	7.59e-06	14306	0.00137625	19.713	family Prevotellaceae id.960	ebi-a-GCST90016948		0.0026	0.0352	0.9407	104247	3011	finn-b-O15_MEMBR_PREMAT_RUPT
530	rs912860	A	G	0.229046	0.0483124	9.3e-07	14306	0.00156866	22.4733	family Prevotellaceae id.960	ebi-a-GCST90016948		-0.1029	0.0885	0.245	104247	3011	finn-b-O15_MEMBR_PREMAT_RUPT
531	rs9586501	G	A	0.0592681	0.0127329	2.59e-06	14306	0.00151221	21.6634	family Prevotellaceae id.960	ebi-a-GCST90016948		-0.104	0.0302	0.000584198	104247	3011	finn-b-O15_MEMBR_PREMAT_RUPT
532	rs9958960	G	A	-0.0914807	0.0173611	1.06e-07	14306	0.00193706	27.7616	family Prevotellaceae id.960	ebi-a-GCST90016948		-0.0675	0.037	0.0680205	104247	3011	finn-b-O15_MEMBR_PREMAT_RUPT
533	rs1035406	G	A	-0.11354	0.0250863	5.84e-06	14306	0.00142983	20.4816	family Rhodospirillaceae id.2717	ebi-a-GCST90016949		0.0195	0.0416	0.6389	104247	3011	finn-b-O15_MEMBR_PREMAT_RUPT
534	rs11591293	G	T	0.0743184	0.0158724	2.67e-06	14306	0.00153012	21.9203	family Rhodospirillaceae id.2717	ebi-a-GCST90016949		0.0309	0.027	0.2534	104247	3011	finn-b-O15_MEMBR_PREMAT_RUPT
535	rs12977163	G	C	0.0730952	0.0163491	7.63e-06	14306	0.00139529	19.9862	family Rhodospirillaceae id.2717	ebi-a-GCST90016949		0.0087	0.0275	0.7508	104247	3011	finn-b-O15_MEMBR_PREMAT_RUPT
536	rs13336560	C	T	-0.0701719	0.0158061	9.17e-06	14306	0.00137582	19.7068	family Rhodospirillaceae id.2717	ebi-a-GCST90016949		-0.0394	0.0274	0.1506	104247	3011	finn-b-O15_MEMBR_PREMAT_RUPT
537	rs1549633	A	C	0.0999312	0.0218634	4.7e-06	14306	0.00145819	20.8884	family Rhodospirillaceae id.2717	ebi-a-GCST90016949		0.0632	0.0418	0.1303	104247	3011	finn-b-O15_MEMBR_PREMAT_RUPT
538	rs1923415	A	G	-0.0999238	0.0227326	9.64e-06	14306	0.00134876	19.3187	family Rhodospirillaceae id.2717	ebi-a-GCST90016949		0.0025	0.0469	0.9573	104247	3011	finn-b-O15_MEMBR_PREMAT_RUPT
539	rs3754624	C	T	0.0971389	0.0200064	1.71e-06	14306	0.00164519	23.5715	family Rhodospirillaceae id.2717	ebi-a-GCST90016949		-0.0359	0.0351	0.3064	104247	3011	finn-b-O15_MEMBR_PREMAT_RUPT
540	rs4278423	T	C	0.107529	0.0235725	3.12e-06	14306	0.00145241	20.8056	family Rhodospirillaceae id.2717	ebi-a-GCST90016949		0.0455	0.0556	0.4132	104247	3011	finn-b-O15_MEMBR_PREMAT_RUPT
541	rs4822789	G	C	0.0734321	0.0160521	7.01e-06	14306	0.00146068	20.9241	family Rhodospirillaceae id.2717	ebi-a-GCST90016949		0.0366	0.0274	0.1824	104247	3011	finn-b-O15_MEMBR_PREMAT_RUPT
542	rs55876211	C	T	-0.0911851	0.0196395	2.87e-06	14306	0.00150458	21.5539	family Rhodospirillaceae id.2717	ebi-a-GCST90016949		-0.0022	0.0306	0.9417	104247	3011	finn-b-O15_MEMBR_PREMAT_RUPT
543	rs61933850	G	A	0.164808	0.0360647	7.23e-06	14306	0.00145761	20.88	family Rhodospirillaceae id.2717	ebi-a-GCST90016949		-0.043	0.0397	0.2778	104247	3011	finn-b-O15_MEMBR_PREMAT_RUPT
544	rs6679026	T	C	0.111984	0.0251088	9.95e-06	14306	0.00138848	19.8884	family Rhodospirillaceae id.2717	ebi-a-GCST90016949		-0.0951	0.0445	0.0324101	104247	3011	finn-b-O15_MEMBR_PREMAT_RUPT
545	rs7001029	C	T	0.117366	0.0261324	5.35e-06	14306	0.00140798	20.1681	family Rhodospirillaceae id.2717	ebi-a-GCST90016949		0.0106	0.046	0.818	104247	3011	finn-b-O15_MEMBR_PREMAT_RUPT
546	rs72714493	A	G	0.0816858	0.0180791	7.35e-06	14306	0.00142496	20.4117	family Rhodospirillaceae id.2717	ebi-a-GCST90016949		0.0333	0.0374	0.3726	104247	3011	finn-b-O15_MEMBR_PREMAT_RUPT
547	rs74354280	C	T	-0.0911896	0.0204907	6.67e-06	14306	0.00138248	19.8023	family Rhodospirillaceae id.2717	ebi-a-GCST90016949		0.0056	0.0299	0.8501	104247	3011	finn-b-O15_MEMBR_PREMAT_RUPT
548	rs76784716	A	G	0.136049	0.0285767	1.49e-06	14306	0.00158183	22.6624	family Rhodospirillaceae id.2717	ebi-a-GCST90016949		0.0067	0.0421	0.8741	104247	3011	finn-b-O15_MEMBR_PREMAT_RUPT
549	rs9813022	A	G	-0.0842444	0.0163583	2.53e-07	14306	0.00185048	26.5183	family Rhodospirillaceae id.2717	ebi-a-GCST90016949		-0.0026	0.0276	0.9251	104247	3011	finn-b-O15_MEMBR_PREMAT_RUPT
550	rs10217435	C	T	-0.0883756	0.0197506	6.51e-06	14306	0.00139759	20.019	family Rikenellaceae id.967	ebi-a-GCST90016950		0.0003	0.0383	0.9934	104247	3011	finn-b-O15_MEMBR_PREMAT_RUPT
551	rs10832801	A	C	-0.0534763	0.0122666	7.5e-06	14306	0.00132672	19.0026	family Rikenellaceae id.967	ebi-a-GCST90016950		0.0035	0.0299	0.9062	104247	3011	finn-b-O15_MEMBR_PREMAT_RUPT
552	rs1939881	G	A	-0.105589	0.0206213	5.64e-07	14306	0.00182933	26.2147	family Rikenellaceae id.967	ebi-a-GCST90016950		0.0224	0.0566	0.6928	104247	3011	finn-b-O15_MEMBR_PREMAT_RUPT
553	rs2447496	A	G	0.0549203	0.0121904	6.09e-06	14306	0.00141676	20.2941	family Rikenellaceae id.967	ebi-a-GCST90016950		-0.0173	0.0303	0.5683	104247	3011	finn-b-O15_MEMBR_PREMAT_RUPT
554	rs2833282	G	A	0.0711137	0.0156966	4.31e-06	14306	0.0014327	20.5227	family Rikenellaceae id.967	ebi-a-GCST90016950		-0.0176	0.0372	0.636499	104247	3011	finn-b-O15_MEMBR_PREMAT_RUPT
555	rs35909684	A	C	-0.0850181	0.0191539	7.1e-06	14306	0.00137528	19.6992	family Rikenellaceae id.967	ebi-a-GCST90016950		-0.0086	0.0511	0.8664	104247	3011	finn-b-O15_MEMBR_PREMAT_RUPT
556	rs36021379	A	G	-0.0656005	0.0144903	7.2e-06	14306	0.0014306	20.4927	family Rikenellaceae id.967	ebi-a-GCST90016950		-0.0032	0.0367	0.9302	104247	3011	finn-b-O15_MEMBR_PREMAT_RUPT
557	rs4264350	T	C	-0.0526393	0.0108555	1.35e-06	14306	0.00164093	23.5104	family Rikenellaceae id.967	ebi-a-GCST90016950		0.0152	0.0267	0.5708	104247	3011	finn-b-O15_MEMBR_PREMAT_RUPT
558	rs4783173	G	C	-0.0481514	0.0110006	7.06e-06	14306	0.00133748	19.1569	family Rikenellaceae id.967	ebi-a-GCST90016950		-0.0213	0.0274	0.4361	104247	3011	finn-b-O15_MEMBR_PREMAT_RUPT
559	rs59663348	G	A	0.0570915	0.0125048	6.12e-06	14306	0.00145492	20.8415	family Rikenellaceae id.967	ebi-a-GCST90016950		-0.0291	0.031	0.348	104247	3011	finn-b-O15_MEMBR_PREMAT_RUPT
560	rs62532512	A	C	0.0504257	0.0107399	2.76e-06	14306	0.00153857	22.0416	family Rikenellaceae id.967	ebi-a-GCST90016950		-0.0472	0.027	0.0805304	104247	3011	finn-b-O15_MEMBR_PREMAT_RUPT
561	rs6744030	C	T	0.0696747	0.0157103	9.32e-06	14306	0.00137299	19.6662	family Rikenellaceae id.967	ebi-a-GCST90016950		0.0276	0.0326	0.3979	104247	3011	finn-b-O15_MEMBR_PREMAT_RUPT
562	rs6837275	A	G	0.0570355	0.011887	1.45e-06	14306	0.00160668	23.0189	family Rikenellaceae id.967	ebi-a-GCST90016950		0.0471	0.0293	0.1077	104247	3011	finn-b-O15_MEMBR_PREMAT_RUPT
563	rs74474130	T	G	0.137747	0.0295688	3.61e-06	14306	0.00151468	21.6988	family Rikenellaceae id.967	ebi-a-GCST90016950		-0.007	0.0731	0.9237	104247	3011	finn-b-O15_MEMBR_PREMAT_RUPT
564	rs77885767	C	T	-0.156209	0.0336482	2.85e-06	14306	0.00150424	21.549	family Rikenellaceae id.967	ebi-a-GCST90016950		0.074	0.0635	0.2444	104247	3011	finn-b-O15_MEMBR_PREMAT_RUPT
565	rs9389714	C	T	-0.0636841	0.0143416	8.79e-06	14306	0.00137642	19.7154	family Rikenellaceae id.967	ebi-a-GCST90016950		-0.0138	0.0478	0.7728	104247	3011	finn-b-O15_MEMBR_PREMAT_RUPT
566	rs9578457	G	A	-0.141478	0.0315848	3.99e-06	14306	0.00140054	20.0614	family Rikenellaceae id.967	ebi-a-GCST90016950		0.0416	0.0621	0.5037	104247	3011	finn-b-O15_MEMBR_PREMAT_RUPT
567	rs9603208	G	T	0.0821173	0.0159596	1.92e-07	14306	0.00184716	26.4706	family Rikenellaceae id.967	ebi-a-GCST90016950		0.0591	0.0445	0.1837	104247	3011	finn-b-O15_MEMBR_PREMAT_RUPT
568	rs10093275	T	C	-0.0534595	0.011677	5.35e-06	14306	0.00146296	20.9569	family Ruminococcaceae id.2050	ebi-a-GCST90016951		0.0325	0.0283	0.2512	104247	3011	finn-b-O15_MEMBR_PREMAT_RUPT
569	rs10166469	C	T	0.053336	0.0120209	8.52e-06	14306	0.00137421	19.6837	family Ruminococcaceae id.2050	ebi-a-GCST90016951		0.0429	0.0307	0.162	104247	3011	finn-b-O15_MEMBR_PREMAT_RUPT
570	rs1612733	T	C	0.108708	0.0238006	4.22e-06	14306	0.00145612	20.8587	family Ruminococcaceae id.2050	ebi-a-GCST90016951		-0.1475	0.0596	0.0134199	104247	3011	finn-b-O15_MEMBR_PREMAT_RUPT
571	rs17376049	T	C	0.0848534	0.0172114	7.3e-07	14306	0.0016961	24.3022	family Ruminococcaceae id.2050	ebi-a-GCST90016951		-0.0236	0.0429	0.582101	104247	3011	finn-b-O15_MEMBR_PREMAT_RUPT
572	rs2113833	C	T	-0.169146	0.0355009	1.14e-06	14306	0.0015843	22.6978	family Ruminococcaceae id.2050	ebi-a-GCST90016951		0.0733	0.0749	0.3277	104247	3011	finn-b-O15_MEMBR_PREMAT_RUPT
573	rs2426816	T	A	-0.0480152	0.0106011	6.04e-06	14306	0.00143191	20.5114	family Ruminococcaceae id.2050	ebi-a-GCST90016951		0.0134	0.0267	0.6152	104247	3011	finn-b-O15_MEMBR_PREMAT_RUPT
574	rs3009418	A	C	-0.0927607	0.0210123	8.69e-06	14306	0.00136042	19.4859	family Ruminococcaceae id.2050	ebi-a-GCST90016951		0.0094	0.0633	0.8824	104247	3011	finn-b-O15_MEMBR_PREMAT_RUPT
575	rs499272	G	C	0.0706431	0.016046	9.29e-06	14306	0.00135301	19.3796	family Ruminococcaceae id.2050	ebi-a-GCST90016951		0.0145	0.0401	0.7172	104247	3011	finn-b-O15_MEMBR_PREMAT_RUPT
576	rs55793120	T	C	0.13822	0.0266152	1.44e-07	14306	0.00188168	26.9663	family Ruminococcaceae id.2050	ebi-a-GCST90016951		0.0096	0.0563	0.8646	104247	3011	finn-b-O15_MEMBR_PREMAT_RUPT
577	rs56199908	T	C	-0.199327	0.0410444	1.66e-06	14306	0.00164585	23.5811	family Ruminococcaceae id.2050	ebi-a-GCST90016951		-0.0429	0.0605	0.4782	104247	3011	finn-b-O15_MEMBR_PREMAT_RUPT
578	rs76724913	T	G	0.0901053	0.0203104	9.6e-06	14306	0.00137388	19.679	family Ruminococcaceae id.2050	ebi-a-GCST90016951		-0.096	0.0451	0.0335398	104247	3011	finn-b-O15_MEMBR_PREMAT_RUPT
579	rs10028567	C	T	-0.0934027	0.0190343	3.72e-06	14306	0.00168034	24.076	family Streptococcaceae id.1850	ebi-a-GCST90016952		-0.0289	0.0407	0.4777	104247	3011	finn-b-O15_MEMBR_PREMAT_RUPT
580	rs11110281	T	C	-0.130554	0.0225943	1.4e-08	14306	0.00232837	33.3827	family Streptococcaceae id.1850	ebi-a-GCST90016952		0.0704	0.0627	0.2614	104247	3011	finn-b-O15_MEMBR_PREMAT_RUPT
581	rs16950051	A	G	0.107008	0.0236973	5.34e-06	14306	0.0014233	20.388	family Streptococcaceae id.1850	ebi-a-GCST90016952		0.0015	0.0542	0.9777	104247	3011	finn-b-O15_MEMBR_PREMAT_RUPT
582	rs2370083	G	T	-0.0842751	0.0184509	4.26e-06	14306	0.00145617	20.8594	family Streptococcaceae id.1850	ebi-a-GCST90016952		0.0588	0.0543	0.2795	104247	3011	finn-b-O15_MEMBR_PREMAT_RUPT
583	rs2952251	G	A	0.0639298	0.0126525	3.72e-07	14306	0.0017814	25.5266	family Streptococcaceae id.1850	ebi-a-GCST90016952		-0.0143	0.0349	0.680801	104247	3011	finn-b-O15_MEMBR_PREMAT_RUPT
584	rs35344081	G	A	0.0609349	0.0129703	2.64e-06	14306	0.00154044	22.0684	family Streptococcaceae id.1850	ebi-a-GCST90016952		0.0264	0.0304	0.3857	104247	3011	finn-b-O15_MEMBR_PREMAT_RUPT
585	rs395407	C	G	0.0826855	0.0172536	1.33e-06	14306	0.00160282	22.9635	family Streptococcaceae id.1850	ebi-a-GCST90016952		-0.0336	0.0372	0.3666	104247	3011	finn-b-O15_MEMBR_PREMAT_RUPT
586	rs4968759	A	G	-0.0544035	0.0111271	8.92e-07	14306	0.00166819	23.9017	family Streptococcaceae id.1850	ebi-a-GCST90016952		0.0077	0.0266	0.7722	104247	3011	finn-b-O15_MEMBR_PREMAT_RUPT
587	rs57646748	G	A	-0.088021	0.019876	7.88e-06	14306	0.00136899	19.6089	family Streptococcaceae id.1850	ebi-a-GCST90016952		0.0236	0.0692	0.733199	104247	3011	finn-b-O15_MEMBR_PREMAT_RUPT
588	rs6563952	C	G	-0.0801931	0.0178576	8.71e-06	14306	0.00140766	20.1636	family Streptococcaceae id.1850	ebi-a-GCST90016952		-0.0024	0.0461	0.9584	104247	3011	finn-b-O15_MEMBR_PREMAT_RUPT
589	rs6806351	T	C	-0.0619209	0.0135744	6.94e-06	14306	0.00145239	20.8052	family Streptococcaceae id.1850	ebi-a-GCST90016952		-0.0192	0.0323	0.5512	104247	3011	finn-b-O15_MEMBR_PREMAT_RUPT
590	rs76717940	T	A	0.150606	0.0334079	3.09e-06	14306	0.00141857	20.3201	family Streptococcaceae id.1850	ebi-a-GCST90016952		0.0677	0.0585	0.2466	104247	3011	finn-b-O15_MEMBR_PREMAT_RUPT
591	rs77968078	G	A	-0.0993013	0.0224788	7.93e-06	14306	0.00136224	19.5121	family Streptococcaceae id.1850	ebi-a-GCST90016952		-0.0179	0.056	0.7484	104247	3011	finn-b-O15_MEMBR_PREMAT_RUPT
592	rs7916711	A	G	0.0959639	0.021545	6.33e-06	14306	0.00138485	19.8364	family Streptococcaceae id.1850	ebi-a-GCST90016952		-0.0098	0.0386	0.7988	104247	3011	finn-b-O15_MEMBR_PREMAT_RUPT
593	rs957755	T	G	-0.0642449	0.0142702	7.42e-06	14306	0.00141476	20.2655	family Streptococcaceae id.1850	ebi-a-GCST90016952		-0.0101	0.0386	0.793601	104247	3011	finn-b-O15_MEMBR_PREMAT_RUPT
594	rs9903102	C	A	-0.0693015	0.0154096	4.92e-06	14306	0.00141179	20.2228	family Streptococcaceae id.1850	ebi-a-GCST90016952		0.0297	0.0334	0.3731	104247	3011	finn-b-O15_MEMBR_PREMAT_RUPT
595	rs11150282	T	C	0.098235	0.0197127	7.36e-07	14306	0.00173288	24.8302	unknown family id.1000001214	ebi-a-GCST90016953		-0.0527	0.0279	0.0587503	104247	3011	finn-b-O15_MEMBR_PREMAT_RUPT
596	rs113884518	T	C	-0.20591	0.0455376	7.74e-06	14306	0.00142717	20.4434	unknown family id.1000001214	ebi-a-GCST90016953		-0.0164	0.0865	0.8497	104247	3011	finn-b-O15_MEMBR_PREMAT_RUPT
597	rs1221147	A	T	-0.126305	0.0279161	4.86e-06	14306	0.00142887	20.4678	unknown family id.1000001214	ebi-a-GCST90016953		-0.0397	0.0374	0.2878	104247	3011	finn-b-O15_MEMBR_PREMAT_RUPT
598	rs16851659	G	C	-0.0895168	0.0186555	1.27e-06	14306	0.00160686	23.0216	unknown family id.1000001214	ebi-a-GCST90016953		0.0003	0.0282	0.9924	104247	3011	finn-b-O15_MEMBR_PREMAT_RUPT
599	rs28678345	T	C	0.213083	0.0471377	8.06e-06	14306	0.00142634	20.4315	unknown family id.1000001214	ebi-a-GCST90016953		-0.001	0.0625	0.9877	104247	3011	finn-b-O15_MEMBR_PREMAT_RUPT
600	rs367480	A	G	0.0841649	0.0185948	7.52e-06	14306	0.00143001	20.4842	unknown family id.1000001214	ebi-a-GCST90016953		0.0155	0.0279	0.578901	104247	3011	finn-b-O15_MEMBR_PREMAT_RUPT
601	rs4129395	G	A	0.0904264	0.0185253	1.22e-06	14306	0.00166272	23.8232	unknown family id.1000001214	ebi-a-GCST90016953		0.0235	0.0267	0.3787	104247	3011	finn-b-O15_MEMBR_PREMAT_RUPT
602	rs73074665	A	T	0.164631	0.0356037	3.62e-06	14306	0.00149233	21.3783	unknown family id.1000001214	ebi-a-GCST90016953		-0.0198	0.0545	0.716	104247	3011	finn-b-O15_MEMBR_PREMAT_RUPT
603	rs789069	A	C	-0.10413	0.0234459	6.5e-06	14306	0.0013769	19.7223	unknown family id.1000001214	ebi-a-GCST90016953		0.0583	0.0382	0.1267	104247	3011	finn-b-O15_MEMBR_PREMAT_RUPT
604	rs79790072	T	C	0.226103	0.0488017	3.54e-06	14306	0.00149821	21.4626	unknown family id.1000001214	ebi-a-GCST90016953		-0.0516	0.0778	0.5072	104247	3011	finn-b-O15_MEMBR_PREMAT_RUPT
605	rs8028558	A	G	0.08346	0.0188504	9.78e-06	14306	0.00136837	19.5999	unknown family id.1000001214	ebi-a-GCST90016953		-0.0316	0.028	0.2581	104247	3011	finn-b-O15_MEMBR_PREMAT_RUPT
606	rs9864379	T	C	-0.160521	0.0292752	4.66e-08	14306	0.00209717	30.061	unknown family id.1000001214	ebi-a-GCST90016953		0.0103	0.0378	0.7845	104247	3011	finn-b-O15_MEMBR_PREMAT_RUPT
607	rs10071529	C	G	-0.125105	0.0278674	8.64e-06	14306	0.00140678	20.151	unknown family id.1000005471	ebi-a-GCST90016954		-0.016	0.0427	0.7071	104247	3011	finn-b-O15_MEMBR_PREMAT_RUPT
608	rs11779863	G	A	-0.0772768	0.0172171	6.69e-06	14306	0.00140621	20.1427	unknown family id.1000005471	ebi-a-GCST90016954		-0.0336	0.0368	0.3619	104247	3011	finn-b-O15_MEMBR_PREMAT_RUPT
609	rs12566890	T	G	-0.103134	0.0241775	8.11e-06	14306	0.00127031	18.1937	unknown family id.1000005471	ebi-a-GCST90016954		0.0298	0.04	0.4553	104247	3011	finn-b-O15_MEMBR_PREMAT_RUPT
610	rs13100746	C	T	0.0638979	0.0142685	7.29e-06	14306	0.00139988	20.0519	unknown family id.1000005471	ebi-a-GCST90016954		-0.0347	0.0268	0.1943	104247	3011	finn-b-O15_MEMBR_PREMAT_RUPT
611	rs17235252	T	C	-0.122002	0.0255463	2.16e-06	14306	0.00159172	22.8043	unknown family id.1000005471	ebi-a-GCST90016954		0.0247	0.0414	0.5514	104247	3011	finn-b-O15_MEMBR_PREMAT_RUPT
612	rs3932485	C	T	0.0626209	0.0141623	9.93e-06	14306	0.00136477	19.5484	unknown family id.1000005471	ebi-a-GCST90016954		0.033	0.0274	0.227	104247	3011	finn-b-O15_MEMBR_PREMAT_RUPT
613	rs515984	C	T	0.0875451	0.0190685	6.61e-06	14306	0.0014712	21.0751	unknown family id.1000005471	ebi-a-GCST90016954		0.0561	0.0417	0.1788	104247	3011	finn-b-O15_MEMBR_PREMAT_RUPT
614	rs62188991	G	C	-0.110864	0.0241355	5.27e-06	14306	0.00147269	21.0964	unknown family id.1000005471	ebi-a-GCST90016954		-0.0164	0.0572	0.774801	104247	3011	finn-b-O15_MEMBR_PREMAT_RUPT
615	rs638542	A	G	0.070592	0.0157049	5.17e-06	14306	0.00141029	20.2013	unknown family id.1000005471	ebi-a-GCST90016954		-0.0343	0.0295	0.2447	104247	3011	finn-b-O15_MEMBR_PREMAT_RUPT
616	rs739151	G	C	-0.0652658	0.0139773	3.09e-06	14306	0.00152176	21.8004	unknown family id.1000005471	ebi-a-GCST90016954		-0.0273	0.0268	0.3079	104247	3011	finn-b-O15_MEMBR_PREMAT_RUPT
617	rs74603314	T	C	0.230767	0.0489701	2.28e-06	14306	0.00154986	22.2037	unknown family id.1000005471	ebi-a-GCST90016954		-0.0368	0.0678	0.5874	104247	3011	finn-b-O15_MEMBR_PREMAT_RUPT
618	rs76373661	G	A	0.0908218	0.0202986	5.16e-06	14306	0.00139741	20.0165	unknown family id.1000005471	ebi-a-GCST90016954		-0.0419	0.0364	0.2497	104247	3011	finn-b-O15_MEMBR_PREMAT_RUPT
619	rs7706512	A	G	-0.0657351	0.0138979	2.27e-06	14306	0.00156135	22.3684	unknown family id.1000005471	ebi-a-GCST90016954		-0.0341	0.0267	0.2006	104247	3011	finn-b-O15_MEMBR_PREMAT_RUPT
620	rs7801843	A	G	-0.0869495	0.0194509	9.47e-06	14306	0.00139486	19.9799	unknown family id.1000005471	ebi-a-GCST90016954		0.0168	0.037	0.649101	104247	3011	finn-b-O15_MEMBR_PREMAT_RUPT
621	rs7853673	A	G	0.0624389	0.0139833	6.73e-06	14306	0.00139177	19.9357	unknown family id.1000005471	ebi-a-GCST90016954		0.0374	0.0267	0.1615	104247	3011	finn-b-O15_MEMBR_PREMAT_RUPT
622	rs949341	A	G	-0.0656602	0.0147216	7.73e-06	14306	0.00138859	19.8899	unknown family id.1000005471	ebi-a-GCST90016954		0.0195	0.0299	0.5144	104247	3011	finn-b-O15_MEMBR_PREMAT_RUPT
623	rs11251024	G	A	0.104201	0.0206737	6.63e-07	14306	0.00177263	25.4008	unknown family id.1000006161	ebi-a-GCST90016955		-0.0195	0.0303	0.5192	104247	3011	finn-b-O15_MEMBR_PREMAT_RUPT
624	rs11606187	A	G	-0.154539	0.0326288	3.31e-06	14306	0.00156558	22.4292	unknown family id.1000006161	ebi-a-GCST90016955		0.0154	0.0385	0.6887	104247	3011	finn-b-O15_MEMBR_PREMAT_RUPT
625	rs13219468	G	C	0.115344	0.0236958	1.41e-06	14306	0.00165352	23.6912	unknown family id.1000006161	ebi-a-GCST90016955		-0.021	0.0296	0.4796	104247	3011	finn-b-O15_MEMBR_PREMAT_RUPT
626	rs13385922	T	C	0.0929494	0.0201348	3.97e-06	14306	0.00148742	21.3078	unknown family id.1000006161	ebi-a-GCST90016955		0.0234	0.028	0.4029	104247	3011	finn-b-O15_MEMBR_PREMAT_RUPT
627	rs166849	A	G	-0.0911053	0.0202239	7.74e-06	14306	0.00141652	20.2907	unknown family id.1000006161	ebi-a-GCST90016955		0.0323	0.0272	0.2355	104247	3011	finn-b-O15_MEMBR_PREMAT_RUPT
628	rs2172426	T	C	0.10212	0.0198947	3.17e-07	14306	0.00183836	26.3443	unknown family id.1000006161	ebi-a-GCST90016955		-0.0315	0.0273	0.2485	104247	3011	finn-b-O15_MEMBR_PREMAT_RUPT
629	rs267959	G	A	-0.0988612	0.0209676	2.62e-06	14306	0.00155154	22.2277	unknown family id.1000006161	ebi-a-GCST90016955		-0.0434	0.0299	0.146	104247	3011	finn-b-O15_MEMBR_PREMAT_RUPT
630	rs2930903	C	G	0.0908335	0.0209434	6.84e-06	14306	0.00131313	18.8078	unknown family id.1000006161	ebi-a-GCST90016955		0.0532	0.0279	0.0567205	104247	3011	finn-b-O15_MEMBR_PREMAT_RUPT
631	rs4383094	C	T	-0.149188	0.0320662	4.28e-06	14306	0.00151077	21.6427	unknown family id.1000006161	ebi-a-GCST90016955		0.0142	0.0382	0.710799	104247	3011	finn-b-O15_MEMBR_PREMAT_RUPT
632	rs55921101	A	T	-0.109245	0.0236201	4.32e-06	14306	0.00149304	21.3884	unknown family id.1000006161	ebi-a-GCST90016955		-0.0486	0.0315	0.1219	104247	3011	finn-b-O15_MEMBR_PREMAT_RUPT
633	rs60583455	T	C	0.108934	0.021177	2.6e-07	14306	0.00184619	26.4568	unknown family id.1000006161	ebi-a-GCST90016955		-0.0345	0.0279	0.2171	104247	3011	finn-b-O15_MEMBR_PREMAT_RUPT
634	rs60775321	T	C	-0.0962425	0.0213842	7.1e-06	14306	0.00141389	20.2529	unknown family id.1000006161	ebi-a-GCST90016955		-0.0003	0.0295	0.9909	104247	3011	finn-b-O15_MEMBR_PREMAT_RUPT
635	rs72671304	T	C	0.172322	0.0370028	3.8e-06	14306	0.00151369	21.6846	unknown family id.1000006161	ebi-a-GCST90016955		-0.0192	0.0509	0.706801	104247	3011	finn-b-O15_MEMBR_PREMAT_RUPT
636	rs7911787	G	T	-0.223071	0.0470232	3.39e-06	14306	0.00157058	22.501	unknown family id.1000006161	ebi-a-GCST90016955		0.0437	0.0761	0.565599	104247	3011	finn-b-O15_MEMBR_PREMAT_RUPT
637	rs8126061	T	C	-0.159135	0.0351904	7.36e-06	14306	0.0014274	20.4467	unknown family id.1000006161	ebi-a-GCST90016955		-0.0194	0.0404	0.6306	104247	3011	finn-b-O15_MEMBR_PREMAT_RUPT
638	rs9542068	T	C	0.0990709	0.0218149	6.52e-06	14306	0.0014396	20.6217	unknown family id.1000006161	ebi-a-GCST90016955		0.0365	0.0283	0.197	104247	3011	finn-b-O15_MEMBR_PREMAT_RUPT
639	rs111810795	C	T	-0.0867108	0.0180573	1.73e-06	14306	0.00160925	23.0558	family Veillonellaceae id.2172	ebi-a-GCST90016956		-0.052	0.045	0.2477	104247	3011	finn-b-O15_MEMBR_PREMAT_RUPT
640	rs114889439	A	G	-0.253809	0.0539169	6.19e-06	14306	0.00154659	22.1566	family Veillonellaceae id.2172	ebi-a-GCST90016956		-0.137	0.0741	0.0644896	104247	3011	finn-b-O15_MEMBR_PREMAT_RUPT
641	rs11700976	C	A	0.0503337	0.0113763	9.25e-06	14306	0.00136648	19.5729	family Veillonellaceae id.2172	ebi-a-GCST90016956		-0.0055	0.0268	0.8374	104247	3011	finn-b-O15_MEMBR_PREMAT_RUPT
642	rs12186441	G	A	0.208096	0.0453999	4.53e-06	14306	0.00146643	21.0067	family Veillonellaceae id.2172	ebi-a-GCST90016956		-0.0021	0.0666	0.9746	104247	3011	finn-b-O15_MEMBR_PREMAT_RUPT
643	rs12668619	A	G	0.055301	0.0117654	2.57e-06	14306	0.00154193	22.0898	family Veillonellaceae id.2172	ebi-a-GCST90016956		-0.0219	0.0285	0.4423	104247	3011	finn-b-O15_MEMBR_PREMAT_RUPT
644	rs12741784	C	T	-0.0621452	0.0119266	1.28e-07	14306	0.00189426	27.147	family Veillonellaceae id.2172	ebi-a-GCST90016956		0.0452	0.0306	0.1395	104247	3011	finn-b-O15_MEMBR_PREMAT_RUPT
645	rs1442060	A	G	0.0514024	0.0112125	4.51e-06	14306	0.00146692	21.0136	family Veillonellaceae id.2172	ebi-a-GCST90016956		0.0279	0.0271	0.3032	104247	3011	finn-b-O15_MEMBR_PREMAT_RUPT
646	rs1447205	C	G	0.0520689	0.0115656	7.35e-06	14306	0.00141478	20.2656	family Veillonellaceae id.2172	ebi-a-GCST90016956		-0.05	0.0278	0.0721905	104247	3011	finn-b-O15_MEMBR_PREMAT_RUPT
647	rs1693340	T	C	0.0818934	0.018245	9.25e-06	14306	0.00140631	20.1442	family Veillonellaceae id.2172	ebi-a-GCST90016956		-0.006	0.0518	0.9086	104247	3011	finn-b-O15_MEMBR_PREMAT_RUPT
648	rs2175069	G	A	0.0526752	0.0114886	4.64e-06	14306	0.00146731	21.0193	family Veillonellaceae id.2172	ebi-a-GCST90016956		-0.0286	0.0277	0.3014	104247	3011	finn-b-O15_MEMBR_PREMAT_RUPT
649	rs2561116	T	G	-0.083617	0.0187159	7.89e-06	14306	0.0013933	19.9575	family Veillonellaceae id.2172	ebi-a-GCST90016956		0.0456	0.0573	0.4261	104247	3011	finn-b-O15_MEMBR_PREMAT_RUPT
650	rs2585520	G	T	-0.0904972	0.0200428	5.27e-06	14306	0.00142304	20.3842	family Veillonellaceae id.2172	ebi-a-GCST90016956		-0.0021	0.0699	0.9763	104247	3011	finn-b-O15_MEMBR_PREMAT_RUPT
651	rs4263802	A	G	-0.050942	0.0114921	7.45e-06	14306	0.00137164	19.6468	family Veillonellaceae id.2172	ebi-a-GCST90016956		-0.0248	0.0284	0.3819	104247	3011	finn-b-O15_MEMBR_PREMAT_RUPT
652	rs4461038	G	A	0.0554965	0.0119467	3.73e-06	14306	0.00150613	21.5762	family Veillonellaceae id.2172	ebi-a-GCST90016956		-0.0291	0.0293	0.3209	104247	3011	finn-b-O15_MEMBR_PREMAT_RUPT
653	rs4797169	T	C	0.0587799	0.0128297	4.49e-06	14306	0.00146511	20.9877	family Veillonellaceae id.2172	ebi-a-GCST90016956		0.024	0.0316	0.4464	104247	3011	finn-b-O15_MEMBR_PREMAT_RUPT
654	rs61264131	A	C	0.202367	0.0464388	6.75e-06	14306	0.00132563	18.987	family Veillonellaceae id.2172	ebi-a-GCST90016956		-0.0083	0.0453	0.8553	104247	3011	finn-b-O15_MEMBR_PREMAT_RUPT
655	rs6692542	G	A	-0.0534397	0.0118254	8.68e-06	14306	0.00142547	20.4191	family Veillonellaceae id.2172	ebi-a-GCST90016956		0.0058	0.0282	0.8384	104247	3011	finn-b-O15_MEMBR_PREMAT_RUPT
656	rs6909981	C	T	-0.0638696	0.0141765	5.48e-06	14306	0.00141683	20.295	family Veillonellaceae id.2172	ebi-a-GCST90016956		-0.0219	0.0414	0.597	104247	3011	finn-b-O15_MEMBR_PREMAT_RUPT
657	rs75768969	C	G	-0.0703773	0.0156855	7.19e-06	14306	0.00140521	20.1283	family Veillonellaceae id.2172	ebi-a-GCST90016956		-0.1022	0.0483	0.0345597	104247	3011	finn-b-O15_MEMBR_PREMAT_RUPT
658	rs79535861	A	C	0.100666	0.0207016	1.58e-06	14306	0.00165015	23.6427	family Veillonellaceae id.2172	ebi-a-GCST90016956		-0.048	0.0465	0.3019	104247	3011	finn-b-O15_MEMBR_PREMAT_RUPT
659	rs9345168	A	C	-0.0509102	0.0113253	8.49e-06	14306	0.00141052	20.2046	family Veillonellaceae id.2172	ebi-a-GCST90016956		0.0053	0.0268	0.8445	104247	3011	finn-b-O15_MEMBR_PREMAT_RUPT
660	rs11184341	C	G	-0.0655301	0.014223	4.14e-06	14306	0.00148162	21.2246	family Verrucomicrobiaceae id.4036	ebi-a-GCST90016957		-0.0437	0.03	0.1448	104247	3011	finn-b-O15_MEMBR_PREMAT_RUPT
661	rs111862613	T	C	0.0907065	0.0196746	3.73e-06	14306	0.00148355	21.2522	family Verrucomicrobiaceae id.4036	ebi-a-GCST90016957		-0.0174	0.0357	0.6261	104247	3011	finn-b-O15_MEMBR_PREMAT_RUPT
662	rs117107102	A	G	0.204683	0.0431572	2.92e-06	14306	0.00156984	22.4904	family Verrucomicrobiaceae id.4036	ebi-a-GCST90016957		0.0297	0.0632	0.6387	104247	3011	finn-b-O15_MEMBR_PREMAT_RUPT
663	rs11729256	T	C	0.0749798	0.0150177	6.73e-07	14306	0.00173943	24.9242	family Verrucomicrobiaceae id.4036	ebi-a-GCST90016957		-0.0299	0.0356	0.4004	104247	3011	finn-b-O15_MEMBR_PREMAT_RUPT
664	rs12908520	G	A	0.0619104	0.0130946	2.15e-06	14306	0.00156008	22.3502	family Verrucomicrobiaceae id.4036	ebi-a-GCST90016957		-0.0076	0.027	0.7772	104247	3011	finn-b-O15_MEMBR_PREMAT_RUPT
665	rs2602429	T	C	-0.0745516	0.0156195	2.7e-06	14306	0.0015899	22.7782	family Verrucomicrobiaceae id.4036	ebi-a-GCST90016957		0.0392	0.0304	0.1975	104247	3011	finn-b-O15_MEMBR_PREMAT_RUPT
666	rs4242783	A	G	-0.0687992	0.0147694	2.75e-06	14306	0.00151448	21.696	family Verrucomicrobiaceae id.4036	ebi-a-GCST90016957		-0.0041	0.0297	0.8904	104247	3011	finn-b-O15_MEMBR_PREMAT_RUPT
667	rs4936098	G	A	-0.0648691	0.0135928	1.13e-06	14306	0.00158946	22.7718	family Verrucomicrobiaceae id.4036	ebi-a-GCST90016957		-0.0046	0.028	0.8688	104247	3011	finn-b-O15_MEMBR_PREMAT_RUPT
668	rs61779207	G	A	-0.0758811	0.0167762	6.63e-06	14306	0.00142804	20.4559	family Verrucomicrobiaceae id.4036	ebi-a-GCST90016957		0.0249	0.0321	0.4381	104247	3011	finn-b-O15_MEMBR_PREMAT_RUPT
669	rs74542928	T	C	0.112124	0.0236422	1.65e-06	14306	0.00156971	22.4885	family Verrucomicrobiaceae id.4036	ebi-a-GCST90016957		-0.0041	0.0626	0.9479	104247	3011	finn-b-O15_MEMBR_PREMAT_RUPT
670	rs9349825	A	G	-0.0704354	0.0147128	2.51e-06	14306	0.00159948	22.9156	family Verrucomicrobiaceae id.4036	ebi-a-GCST90016957		0.0263	0.0341	0.4409	104247	3011	finn-b-O15_MEMBR_PREMAT_RUPT
671	rs941682	G	A	-0.0631526	0.0143767	9.58e-06	14306	0.00134698	19.2932	family Verrucomicrobiaceae id.4036	ebi-a-GCST90016957		-0.0397	0.0299	0.1843	104247	3011	finn-b-O15_MEMBR_PREMAT_RUPT
672	rs11671100	A	C	-0.160034	0.0349472	4.08e-06	14306	0.00146368	20.9671	family Victivallaceae id.2255	ebi-a-GCST90016958		0.0858	0.0334	0.0102101	104247	3011	finn-b-O15_MEMBR_PREMAT_RUPT
673	rs11764871	G	T	0.127099	0.025656	7.49e-07	14306	0.00171255	24.5384	family Victivallaceae id.2255	ebi-a-GCST90016958		-0.0212	0.029	0.465	104247	3011	finn-b-O15_MEMBR_PREMAT_RUPT
674	rs2546105	T	A	-0.126643	0.0257111	1.03e-06	14306	0.00169304	24.2583	family Victivallaceae id.2255	ebi-a-GCST90016958		-0.0226	0.0309	0.4657	104247	3011	finn-b-O15_MEMBR_PREMAT_RUPT
675	rs2944282	T	C	-0.124197	0.0257026	1.57e-06	14306	0.00162945	23.3457	family Victivallaceae id.2255	ebi-a-GCST90016958		0.0374	0.0297	0.2073	104247	3011	finn-b-O15_MEMBR_PREMAT_RUPT
676	rs34962571	A	C	-0.186945	0.0418412	6.25e-06	14306	0.00139346	19.9599	family Victivallaceae id.2255	ebi-a-GCST90016958		0.0865	0.0446	0.0526102	104247	3011	finn-b-O15_MEMBR_PREMAT_RUPT
677	rs4396289	C	T	-0.152918	0.0288525	1.54e-07	14306	0.00195966	28.086	family Victivallaceae id.2255	ebi-a-GCST90016958		-0.0793	0.04	0.0475697	104247	3011	finn-b-O15_MEMBR_PREMAT_RUPT
678	rs61702987	T	C	0.145501	0.0300007	3.08e-06	14306	0.00164149	23.5184	family Victivallaceae id.2255	ebi-a-GCST90016958		0.0276	0.0433	0.5239	104247	3011	finn-b-O15_MEMBR_PREMAT_RUPT
679	rs62570196	C	T	-0.246101	0.0483077	2.7e-07	14306	0.00181088	25.9498	family Victivallaceae id.2255	ebi-a-GCST90016958		0.1705	0.0669	0.0107701	104247	3011	finn-b-O15_MEMBR_PREMAT_RUPT
680	rs6545794	A	G	-0.197786	0.0410495	5.97e-07	14306	0.00162014	23.2121	family Victivallaceae id.2255	ebi-a-GCST90016958		0.0319	0.0411	0.4371	104247	3011	finn-b-O15_MEMBR_PREMAT_RUPT
681	rs67832247	C	T	-0.123489	0.0266695	3.24e-06	14306	0.00149644	21.4371	family Victivallaceae id.2255	ebi-a-GCST90016958		-0.0122	0.0288	0.672	104247	3011	finn-b-O15_MEMBR_PREMAT_RUPT
682	rs7077363	G	A	0.148942	0.0318366	2.83e-06	14306	0.00152756	21.8837	family Victivallaceae id.2255	ebi-a-GCST90016958		0.0513	0.0363	0.1574	104247	3011	finn-b-O15_MEMBR_PREMAT_RUPT
683	rs7314815	G	A	0.101088	0.0225594	6.4e-06	14306	0.00140158	20.0763	family Victivallaceae id.2255	ebi-a-GCST90016958		0.0283	0.027	0.2952	104247	3011	finn-b-O15_MEMBR_PREMAT_RUPT
684	rs7627405	C	T	-0.134158	0.0301427	8.19e-06	14306	0.00138277	19.8065	family Victivallaceae id.2255	ebi-a-GCST90016958		0.0232	0.034	0.494399	104247	3011	finn-b-O15_MEMBR_PREMAT_RUPT
685	rs7860510	G	C	0.164855	0.0375128	9.6e-06	14306	0.00134816	19.3101	family Victivallaceae id.2255	ebi-a-GCST90016958		-0.0153	0.0504	0.760699	104247	3011	finn-b-O15_MEMBR_PREMAT_RUPT
686	rs10787984	G	C	0.094316	0.0213513	9.62e-06	14306	0.00136211	19.5102	genus Actinomyces id.423	ebi-a-GCST90016959		0.0243	0.0444	0.5841	104247	3011	finn-b-O15_MEMBR_PREMAT_RUPT
687	rs2715439	T	C	-0.0746684	0.0164822	6.27e-06	14306	0.00143253	20.5202	genus Actinomyces id.423	ebi-a-GCST90016959		-0.0238	0.0266	0.3725	104247	3011	finn-b-O15_MEMBR_PREMAT_RUPT
688	rs34583783	G	T	0.126596	0.0268461	4.49e-06	14306	0.00155197	22.234	genus Actinomyces id.423	ebi-a-GCST90016959		-0.0012	0.0563	0.9832	104247	3011	finn-b-O15_MEMBR_PREMAT_RUPT
689	rs35011108	A	G	0.232634	0.0512044	6.34e-06	14306	0.00144075	20.6382	genus Actinomyces id.423	ebi-a-GCST90016959		-0.1352	0.054	0.01224	104247	3011	finn-b-O15_MEMBR_PREMAT_RUPT
690	rs4073240	G	A	0.0749687	0.0167368	7.94e-06	14306	0.00140052	20.0611	genus Actinomyces id.423	ebi-a-GCST90016959		-0.0375	0.0275	0.1728	104247	3011	finn-b-O15_MEMBR_PREMAT_RUPT
691	rs4146653	G	A	0.0985224	0.0214182	4.5e-06	14306	0.00147688	21.1565	genus Actinomyces id.423	ebi-a-GCST90016959		0.0333	0.0385	0.387	104247	3011	finn-b-O15_MEMBR_PREMAT_RUPT
692	rs71315246	A	G	-0.0969809	0.021925	9.83e-06	14306	0.00136578	19.5629	genus Actinomyces id.423	ebi-a-GCST90016959		0.0025	0.0389	0.9492	104247	3011	finn-b-O15_MEMBR_PREMAT_RUPT
693	rs7915461	C	T	-0.18776	0.0401636	5.92e-06	14306	0.00152532	21.8514	genus Actinomyces id.423	ebi-a-GCST90016959		-0.0773	0.0529	0.1438	104247	3011	finn-b-O15_MEMBR_PREMAT_RUPT
694	rs1046175	G	C	-0.112758	0.0255994	6.36e-06	14306	0.00135434	19.3988	genus Adlercreutzia id.812	ebi-a-GCST90016960		-0.059	0.0525	0.2607	104247	3011	finn-b-O15_MEMBR_PREMAT_RUPT
695	rs11604400	C	T	-0.102524	0.0234834	9.74e-06	14306	0.00133055	19.0576	genus Adlercreutzia id.812	ebi-a-GCST90016960		-0.0014	0.0434	0.9742	104247	3011	finn-b-O15_MEMBR_PREMAT_RUPT
696	rs12522517	A	T	-0.104884	0.0234695	4.41e-06	14306	0.00139408	19.9687	genus Adlercreutzia id.812	ebi-a-GCST90016960		-0.0423	0.038	0.2658	104247	3011	finn-b-O15_MEMBR_PREMAT_RUPT
697	rs13231526	C	A	0.143237	0.0311654	4.81e-06	14306	0.00147437	21.1205	genus Adlercreutzia id.812	ebi-a-GCST90016960		-0.0152	0.049	0.756599	104247	3011	finn-b-O15_MEMBR_PREMAT_RUPT
698	rs2147798	G	C	-0.0922959	0.0192121	1.4e-06	14306	0.00161063	23.0757	genus Adlercreutzia id.812	ebi-a-GCST90016960		0.0213	0.0309	0.4901	104247	3011	finn-b-O15_MEMBR_PREMAT_RUPT
699	rs2717140	C	T	-0.119225	0.0251081	2.05e-06	14306	0.00157364	22.5448	genus Adlercreutzia id.812	ebi-a-GCST90016960		-0.0088	0.0445	0.8436	104247	3011	finn-b-O15_MEMBR_PREMAT_RUPT
700	rs55719207	G	A	-0.0699243	0.0158036	9.61e-06	14306	0.00136657	19.5742	genus Adlercreutzia id.812	ebi-a-GCST90016960		-0.0198	0.0273	0.4693	104247	3011	finn-b-O15_MEMBR_PREMAT_RUPT
701	rs6664405	T	C	-0.0953084	0.0210752	5.23e-06	14306	0.00142751	20.4483	genus Adlercreutzia id.812	ebi-a-GCST90016960		-0.0233	0.0383	0.543501	104247	3011	finn-b-O15_MEMBR_PREMAT_RUPT
702	rs7680684	T	C	0.083381	0.0168901	9.77e-07	14306	0.00170064	24.3674	genus Adlercreutzia id.812	ebi-a-GCST90016960		-0.0056	0.0281	0.8421	104247	3011	finn-b-O15_MEMBR_PREMAT_RUPT
703	rs80078995	A	T	-0.11324	0.0232586	1.57e-06	14306	0.00165423	23.7013	genus Adlercreutzia id.812	ebi-a-GCST90016960		-0.0266	0.038	0.4846	104247	3011	finn-b-O15_MEMBR_PREMAT_RUPT
704	rs9490822	C	T	-0.0734512	0.0155789	2.54e-06	14306	0.00155143	22.2261	genus Adlercreutzia id.812	ebi-a-GCST90016960		0.0222	0.0269	0.4082	104247	3011	finn-b-O15_MEMBR_PREMAT_RUPT
705	rs9915817	C	T	-0.0749219	0.016833	8.22e-06	14306	0.00138285	19.8077	genus Adlercreutzia id.812	ebi-a-GCST90016960		-0.0197	0.0294	0.5036	104247	3011	finn-b-O15_MEMBR_PREMAT_RUPT
706	rs11184341	C	G	-0.0655855	0.0142236	4.06e-06	14306	0.001484	21.2587	genus Akkermansia id.4037	ebi-a-GCST90016961		-0.0437	0.03	0.1448	104247	3011	finn-b-O15_MEMBR_PREMAT_RUPT
707	rs111862613	T	C	0.0911199	0.0196748	3.39e-06	14306	0.00149705	21.4459	genus Akkermansia id.4037	ebi-a-GCST90016961		-0.0174	0.0357	0.6261	104247	3011	finn-b-O15_MEMBR_PREMAT_RUPT
708	rs117107102	A	G	0.204406	0.0431629	3.01e-06	14306	0.00156519	22.4236	genus Akkermansia id.4037	ebi-a-GCST90016961		0.0297	0.0632	0.6387	104247	3011	finn-b-O15_MEMBR_PREMAT_RUPT
709	rs11729256	T	C	0.0750473	0.0150184	6.58e-07	14306	0.0017424	24.9668	genus Akkermansia id.4037	ebi-a-GCST90016961		-0.0299	0.0356	0.4004	104247	3011	finn-b-O15_MEMBR_PREMAT_RUPT
710	rs12908520	G	A	0.061772	0.0130954	2.26e-06	14306	0.00155293	22.2477	genus Akkermansia id.4037	ebi-a-GCST90016961		-0.0076	0.027	0.7772	104247	3011	finn-b-O15_MEMBR_PREMAT_RUPT
711	rs2602429	T	C	-0.0745352	0.0156201	2.72e-06	14306	0.00158908	22.7664	genus Akkermansia id.4037	ebi-a-GCST90016961		0.0392	0.0304	0.1975	104247	3011	finn-b-O15_MEMBR_PREMAT_RUPT
712	rs4242783	A	G	-0.0685454	0.0147701	3e-06	14306	0.00150321	21.5342	genus Akkermansia id.4037	ebi-a-GCST90016961		-0.0041	0.0297	0.8904	104247	3011	finn-b-O15_MEMBR_PREMAT_RUPT
713	rs4936098	G	A	-0.0649225	0.0135934	1.1e-06	14306	0.00159193	22.8073	genus Akkermansia id.4037	ebi-a-GCST90016961		-0.0046	0.028	0.8688	104247	3011	finn-b-O15_MEMBR_PREMAT_RUPT
714	rs61779207	G	A	-0.0760539	0.0167769	6.32e-06	14306	0.00143443	20.5475	genus Akkermansia id.4037	ebi-a-GCST90016961		0.0249	0.0321	0.4381	104247	3011	finn-b-O15_MEMBR_PREMAT_RUPT
715	rs74542928	T	C	0.112623	0.0236434	1.48e-06	14306	0.00158354	22.6868	genus Akkermansia id.4037	ebi-a-GCST90016961		-0.0041	0.0626	0.9479	104247	3011	finn-b-O15_MEMBR_PREMAT_RUPT
716	rs9349825	A	G	-0.0703407	0.0147133	2.6e-06	14306	0.00159508	22.8524	genus Akkermansia id.4037	ebi-a-GCST90016961		0.0263	0.0341	0.4409	104247	3011	finn-b-O15_MEMBR_PREMAT_RUPT
717	rs941682	G	A	-0.0632957	0.0143777	9.17e-06	14306	0.00135289	19.378	genus Akkermansia id.4037	ebi-a-GCST90016961		-0.0397	0.0299	0.1843	104247	3011	finn-b-O15_MEMBR_PREMAT_RUPT
718	rs1107244	G	A	0.0758558	0.0171182	3.59e-06	14306	0.00137072	19.6336	genus Alistipes id.968	ebi-a-GCST90016962		0.0628	0.0498	0.2073	104247	3011	finn-b-O15_MEMBR_PREMAT_RUPT
719	rs11769002	G	A	-0.0528793	0.0109389	1.45e-06	14306	0.00163079	23.3649	genus Alistipes id.968	ebi-a-GCST90016962		-0.0273	0.0271	0.3138	104247	3011	finn-b-O15_MEMBR_PREMAT_RUPT
720	rs11958296	A	G	-0.0981222	0.0218272	9.3e-06	14306	0.00141061	20.2059	genus Alistipes id.968	ebi-a-GCST90016962		-0.0677	0.0657	0.3024	104247	3011	finn-b-O15_MEMBR_PREMAT_RUPT
721	rs12990744	C	T	-0.0776618	0.0172986	8.21e-06	14306	0.0014069	20.1527	genus Alistipes id.968	ebi-a-GCST90016962		0.0206	0.0444	0.6423	104247	3011	finn-b-O15_MEMBR_PREMAT_RUPT
722	rs1689282	A	C	-0.0520061	0.0113942	5.28e-06	14306	0.00145409	20.8296	genus Alistipes id.968	ebi-a-GCST90016962		0.0614	0.0287	0.0322998	104247	3011	finn-b-O15_MEMBR_PREMAT_RUPT
723	rs2290844	C	T	0.0813969	0.0191632	9.1e-06	14306	0.00125955	18.0393	genus Alistipes id.968	ebi-a-GCST90016962		0.0762	0.0425	0.0729407	104247	3011	finn-b-O15_MEMBR_PREMAT_RUPT
724	rs2450745	A	C	-0.080524	0.0184702	7.12e-06	14306	0.00132682	19.0041	genus Alistipes id.968	ebi-a-GCST90016962		-0.0123	0.0524	0.8143	104247	3011	finn-b-O15_MEMBR_PREMAT_RUPT
725	rs2875322	C	T	0.0580945	0.0131432	8.78e-06	14306	0.00136382	19.5347	genus Alistipes id.968	ebi-a-GCST90016962		-0.0252	0.0357	0.4809	104247	3011	finn-b-O15_MEMBR_PREMAT_RUPT
726	rs34417064	A	G	-0.048202	0.0106868	7.01e-06	14306	0.00142004	20.3411	genus Alistipes id.968	ebi-a-GCST90016962		0.0038	0.0268	0.8885	104247	3011	finn-b-O15_MEMBR_PREMAT_RUPT
727	rs4810359	A	G	-0.0652428	0.0146155	7.5e-06	14306	0.00139096	19.924	genus Alistipes id.968	ebi-a-GCST90016962		-0.0213	0.0406	0.6006	104247	3011	finn-b-O15_MEMBR_PREMAT_RUPT
728	rs62576416	T	C	0.0492647	0.0109733	7.5e-06	14306	0.00140691	20.1528	genus Alistipes id.968	ebi-a-GCST90016962		0.0166	0.0275	0.5463	104247	3011	finn-b-O15_MEMBR_PREMAT_RUPT
729	rs7129639	A	C	0.0524955	0.0109584	1.78e-06	14306	0.00160153	22.9451	genus Alistipes id.968	ebi-a-GCST90016962		0.0039	0.0284	0.8899	104247	3011	finn-b-O15_MEMBR_PREMAT_RUPT
730	rs8130320	A	G	-0.049002	0.010717	4.84e-06	14306	0.00145925	20.9036	genus Alistipes id.968	ebi-a-GCST90016962		-0.0123	0.0269	0.6483	104247	3011	finn-b-O15_MEMBR_PREMAT_RUPT
731	rs1901739	G	T	-0.115769	0.0248626	3.59e-06	14306	0.00151327	21.6786	genus Allisonella id.2174	ebi-a-GCST90016963		0.013	0.0267	0.627899	104247	3011	finn-b-O15_MEMBR_PREMAT_RUPT
732	rs35110698	T	C	-0.146322	0.0320852	5.72e-06	14306	0.00145165	20.7945	genus Allisonella id.2174	ebi-a-GCST90016963		0.0076	0.0378	0.8404	104247	3011	finn-b-O15_MEMBR_PREMAT_RUPT
733	rs35778461	C	T	0.146679	0.0297186	1.21e-06	14306	0.0016999	24.3567	genus Allisonella id.2174	ebi-a-GCST90016963		-0.0326	0.0319	0.3057	104247	3011	finn-b-O15_MEMBR_PREMAT_RUPT
734	rs594561	T	C	-0.112231	0.0251681	9.41e-06	14306	0.00138804	19.8822	genus Allisonella id.2174	ebi-a-GCST90016963		0.0365	0.0266	0.1706	104247	3011	finn-b-O15_MEMBR_PREMAT_RUPT
735	rs602075	G	A	-0.168974	0.0296976	3.57e-08	14306	0.00225786	32.3695	genus Allisonella id.2174	ebi-a-GCST90016963		0.0124	0.0302	0.682501	104247	3011	finn-b-O15_MEMBR_PREMAT_RUPT
736	rs6742198	A	G	-0.149152	0.0316484	3.35e-06	14306	0.00155011	22.2072	genus Allisonella id.2174	ebi-a-GCST90016963		-0.0071	0.0313	0.8197	104247	3011	finn-b-O15_MEMBR_PREMAT_RUPT
737	rs685403	G	C	-0.175203	0.0404474	4.88e-06	14306	0.00130983	18.7604	genus Allisonella id.2174	ebi-a-GCST90016963		0.0477	0.0395	0.2272	104247	3011	finn-b-O15_MEMBR_PREMAT_RUPT
738	rs76904847	G	A	0.148523	0.0334857	6.09e-06	14306	0.00137326	19.6702	genus Allisonella id.2174	ebi-a-GCST90016963		-0.0032	0.0356	0.9291	104247	3011	finn-b-O15_MEMBR_PREMAT_RUPT
739	rs7898615	T	G	0.167966	0.0373586	8.87e-06	14306	0.00141101	20.2116	genus Allisonella id.2174	ebi-a-GCST90016963		0.0053	0.0389	0.8911	104247	3011	finn-b-O15_MEMBR_PREMAT_RUPT
740	rs12675596	G	T	0.145669	0.0290678	9.64e-07	14306	0.00175239	25.1101	genus Alloprevotella id.961	ebi-a-GCST90016964		-0.0207	0.0326	0.525	104247	3011	finn-b-O15_MEMBR_PREMAT_RUPT
741	rs17380632	A	T	0.125564	0.0280409	9.27e-06	14306	0.00139965	20.0487	genus Alloprevotella id.961	ebi-a-GCST90016964		-0.0108	0.0315	0.731601	104247	3011	finn-b-O15_MEMBR_PREMAT_RUPT
742	rs2154444	G	T	-0.138234	0.0308961	8.37e-06	14306	0.00139732	20.0153	genus Alloprevotella id.961	ebi-a-GCST90016964		-0.0223	0.0304	0.4634	104247	3011	finn-b-O15_MEMBR_PREMAT_RUPT
743	rs34619204	G	A	-0.156037	0.0344392	8.84e-06	14306	0.00143287	20.5252	genus Alloprevotella id.961	ebi-a-GCST90016964		0.0286	0.0352	0.4159	104247	3011	finn-b-O15_MEMBR_PREMAT_RUPT
744	rs4364940	A	G	0.126418	0.0282207	8.58e-06	14306	0.00140073	20.0642	genus Alloprevotella id.961	ebi-a-GCST90016964		-0.0012	0.0289	0.9679	104247	3011	finn-b-O15_MEMBR_PREMAT_RUPT
745	rs4680035	G	A	0.119599	0.0259446	4.99e-06	14306	0.0014832	21.2471	genus Alloprevotella id.961	ebi-a-GCST90016964		-0.0126	0.0274	0.6446	104247	3011	finn-b-O15_MEMBR_PREMAT_RUPT
746	rs58212166	A	G	-0.161506	0.0359102	7.94e-06	14306	0.00141192	20.2246	genus Alloprevotella id.961	ebi-a-GCST90016964		-0.0047	0.0345	0.891	104247	3011	finn-b-O15_MEMBR_PREMAT_RUPT
747	rs10794359	C	T	0.0953524	0.02006	2.23e-06	14306	0.00157688	22.5913	genus Anaerofilum id.2053	ebi-a-GCST90016965		-0.0379	0.027	0.1609	104247	3011	finn-b-O15_MEMBR_PREMAT_RUPT
748	rs1563175	A	C	0.0923834	0.0202157	5.54e-06	14306	0.00145767	20.8809	genus Anaerofilum id.2053	ebi-a-GCST90016965		0.009	0.0268	0.7358	104247	3011	finn-b-O15_MEMBR_PREMAT_RUPT
749	rs17012738	T	G	0.0903417	0.0200239	7.24e-06	14306	0.00142083	20.3525	genus Anaerofilum id.2053	ebi-a-GCST90016965		-0.0453	0.0268	0.0905691	104247	3011	finn-b-O15_MEMBR_PREMAT_RUPT
750	rs17096874	C	T	-0.126337	0.0268919	2.86e-06	14306	0.00154039	22.0677	genus Anaerofilum id.2053	ebi-a-GCST90016965		0.0257	0.0327	0.4313	104247	3011	finn-b-O15_MEMBR_PREMAT_RUPT
751	rs17105491	G	C	-0.193107	0.0411187	1.57e-06	14306	0.00153932	22.0524	genus Anaerofilum id.2053	ebi-a-GCST90016965		0.0218	0.0558	0.6962	104247	3011	finn-b-O15_MEMBR_PREMAT_RUPT
752	rs356049	G	A	0.132603	0.0289802	6.56e-06	14306	0.00146134	20.9336	genus Anaerofilum id.2053	ebi-a-GCST90016965		0.0006	0.0536	0.9916	104247	3011	finn-b-O15_MEMBR_PREMAT_RUPT
753	rs4244069	A	G	0.146775	0.0326594	9.81e-06	14306	0.0014098	20.1942	genus Anaerofilum id.2053	ebi-a-GCST90016965		0.0464	0.0407	0.2543	104247	3011	finn-b-O15_MEMBR_PREMAT_RUPT
754	rs4506496	A	G	-0.10309	0.0212861	1.49e-06	14306	0.00163686	23.452	genus Anaerofilum id.2053	ebi-a-GCST90016965		0.0299	0.0294	0.3098	104247	3011	finn-b-O15_MEMBR_PREMAT_RUPT
755	rs712981	A	C	0.10076	0.0202902	6.83e-07	14306	0.00172083	24.6572	genus Anaerofilum id.2053	ebi-a-GCST90016965		0.0008	0.0275	0.9756	104247	3011	finn-b-O15_MEMBR_PREMAT_RUPT
756	rs79598899	C	T	0.182586	0.0357284	3.75e-07	14306	0.00182221	26.1124	genus Anaerofilum id.2053	ebi-a-GCST90016965		-0.017	0.0633	0.788501	104247	3011	finn-b-O15_MEMBR_PREMAT_RUPT
757	rs816292	T	C	-0.113003	0.02204	2.64e-07	14306	0.00183418	26.2843	genus Anaerofilum id.2053	ebi-a-GCST90016965		0.011	0.0293	0.707499	104247	3011	finn-b-O15_MEMBR_PREMAT_RUPT
758	rs9299345	T	C	-0.1364	0.0302372	8.04e-06	14306	0.0014204	20.3463	genus Anaerofilum id.2053	ebi-a-GCST90016965		-0.0167	0.0452	0.7121	104247	3011	finn-b-O15_MEMBR_PREMAT_RUPT
759	rs10502061	A	G	0.0835752	0.0192017	7.94e-06	14306	0.00132246	18.9415	genus Anaerostipes id.1991	ebi-a-GCST90016966		0.0231	0.0418	0.581	104247	3011	finn-b-O15_MEMBR_PREMAT_RUPT
760	rs13376554	A	T	0.197389	0.0458642	7.72e-06	14306	0.00129306	18.5199	genus Anaerostipes id.1991	ebi-a-GCST90016966		-0.0909	0.084	0.2792	104247	3011	finn-b-O15_MEMBR_PREMAT_RUPT
761	rs2014785	T	C	0.0515687	0.0112199	4.68e-06	14306	0.00147447	21.1219	genus Anaerostipes id.1991	ebi-a-GCST90016966		-0.024	0.0272	0.378	104247	3011	finn-b-O15_MEMBR_PREMAT_RUPT
762	rs2396460	C	T	0.0512653	0.0109555	2.91e-06	14306	0.00152827	21.8938	genus Anaerostipes id.1991	ebi-a-GCST90016966		0.0009	0.0269	0.9721	104247	3011	finn-b-O15_MEMBR_PREMAT_RUPT
763	rs2804244	G	A	0.053089	0.0110983	2.04e-06	14306	0.00159692	22.8789	genus Anaerostipes id.1991	ebi-a-GCST90016966		0.0521	0.0275	0.0577697	104247	3011	finn-b-O15_MEMBR_PREMAT_RUPT
764	rs3900776	G	A	-0.110013	0.0236302	2.75e-06	14306	0.00151279	21.6717	genus Anaerostipes id.1991	ebi-a-GCST90016966		0.0402	0.081	0.6192	104247	3011	finn-b-O15_MEMBR_PREMAT_RUPT
765	rs60983350	G	A	-0.0539901	0.0116575	4.42e-06	14306	0.00149709	21.4465	genus Anaerostipes id.1991	ebi-a-GCST90016966		0.0275	0.0288	0.3395	104247	3011	finn-b-O15_MEMBR_PREMAT_RUPT
766	rs62157625	T	C	0.088573	0.0185548	1.45e-06	14306	0.00159031	22.784	genus Anaerostipes id.1991	ebi-a-GCST90016966		-0.0024	0.041	0.9527	104247	3011	finn-b-O15_MEMBR_PREMAT_RUPT
767	rs62215703	G	A	0.0644965	0.0136702	1.98e-06	14306	0.00155356	22.2568	genus Anaerostipes id.1991	ebi-a-GCST90016966		-0.0629	0.0324	0.0521903	104247	3011	finn-b-O15_MEMBR_PREMAT_RUPT
768	rs6474958	G	A	0.0500065	0.0112001	6.74e-06	14306	0.00139151	19.9319	genus Anaerostipes id.1991	ebi-a-GCST90016966		-0.0324	0.0289	0.2634	104247	3011	finn-b-O15_MEMBR_PREMAT_RUPT
769	rs6726833	C	A	-0.0877497	0.0189408	3.32e-06	14306	0.00149805	21.4602	genus Anaerostipes id.1991	ebi-a-GCST90016966		-0.0352	0.05	0.4814	104247	3011	finn-b-O15_MEMBR_PREMAT_RUPT
770	rs6854026	C	T	0.0508482	0.0109075	3.2e-06	14306	0.00151678	21.729	genus Anaerostipes id.1991	ebi-a-GCST90016966		-0.0226	0.0269	0.4014	104247	3011	finn-b-O15_MEMBR_PREMAT_RUPT
771	rs7193624	T	C	-0.0750642	0.0150723	5.35e-07	14306	0.00173076	24.7997	genus Anaerostipes id.1991	ebi-a-GCST90016966		0.0265	0.0483	0.5827	104247	3011	finn-b-O15_MEMBR_PREMAT_RUPT
772	rs7823228	C	G	0.0621085	0.0136614	5.84e-06	14306	0.00144267	20.6657	genus Anaerostipes id.1991	ebi-a-GCST90016966		-0.0811	0.0356	0.0227101	104247	3011	finn-b-O15_MEMBR_PREMAT_RUPT
773	rs78735375	A	C	-0.137429	0.0305304	5.33e-06	14306	0.00141436	20.2596	genus Anaerostipes id.1991	ebi-a-GCST90016966		0.0304	0.0679	0.6546	104247	3011	finn-b-O15_MEMBR_PREMAT_RUPT
774	rs10150232	A	G	0.0567088	0.0124877	6.68e-06	14306	0.00143943	20.6194	genus Anaerotruncus id.2054	ebi-a-GCST90016967		-0.0205	0.0334	0.5401	104247	3011	finn-b-O15_MEMBR_PREMAT_RUPT
775	rs11018566	A	G	-0.156465	0.0366032	6.14e-06	14306	0.00127563	18.2699	genus Anaerotruncus id.2054	ebi-a-GCST90016967		-0.0245	0.0599	0.6824	104247	3011	finn-b-O15_MEMBR_PREMAT_RUPT
776	rs115414803	A	C	-0.144356	0.0317524	6.83e-06	14306	0.00144268	20.666	genus Anaerotruncus id.2054	ebi-a-GCST90016967		-0.0375	0.056	0.5028	104247	3011	finn-b-O15_MEMBR_PREMAT_RUPT
777	rs12056802	C	G	0.0774194	0.0177178	6.13e-06	14306	0.00133285	19.0906	genus Anaerotruncus id.2054	ebi-a-GCST90016967		-0.0224	0.0399	0.5748	104247	3011	finn-b-O15_MEMBR_PREMAT_RUPT
778	rs1272208	T	G	0.0611743	0.0129831	4.28e-06	14306	0.00154949	22.1983	genus Anaerotruncus id.2054	ebi-a-GCST90016967		0.0201	0.0315	0.5224	104247	3011	finn-b-O15_MEMBR_PREMAT_RUPT
779	rs1431492	C	T	-0.0654996	0.0146188	7.36e-06	14306	0.00140129	20.0721	genus Anaerotruncus id.2054	ebi-a-GCST90016967		0.1149	0.0366	0.00169899	104247	3011	finn-b-O15_MEMBR_PREMAT_RUPT
780	rs17734739	T	C	0.0660052	0.014908	7.43e-06	14306	0.00136837	19.6	genus Anaerotruncus id.2054	ebi-a-GCST90016967		-0.041	0.0383	0.2843	104247	3011	finn-b-O15_MEMBR_PREMAT_RUPT
781	rs2704155	T	A	-0.106235	0.0234815	5.42e-06	14306	0.00142871	20.4655	genus Anaerotruncus id.2054	ebi-a-GCST90016967		-1.1138	0.7432	0.134	104247	3011	finn-b-O15_MEMBR_PREMAT_RUPT
782	rs2704155	T	A	-0.106235	0.0234815	5.42e-06	14306	0.00142871	20.4655	genus Anaerotruncus id.2054	ebi-a-GCST90016967		-0.1471	0.0697	0.0349301	104247	3011	finn-b-O15_MEMBR_PREMAT_RUPT
783	rs34449434	A	C	-0.0497004	0.0113402	9.85e-06	14306	0.00134084	19.2051	genus Anaerotruncus id.2054	ebi-a-GCST90016967		-0.0163	0.0282	0.5622	104247	3011	finn-b-O15_MEMBR_PREMAT_RUPT
784	rs4669806	G	T	0.0576389	0.0122994	2.42e-06	14306	0.00153278	21.9585	genus Anaerotruncus id.2054	ebi-a-GCST90016967		-0.0035	0.0325	0.9139	104247	3011	finn-b-O15_MEMBR_PREMAT_RUPT
785	rs6494922	A	G	0.0903106	0.0202257	6.62e-06	14306	0.00139171	19.9347	genus Anaerotruncus id.2054	ebi-a-GCST90016967		-0.0093	0.0597	0.8763	104247	3011	finn-b-O15_MEMBR_PREMAT_RUPT
786	rs6563550	T	C	0.0877135	0.0176745	2.35e-07	14306	0.00171859	24.6251	genus Anaerotruncus id.2054	ebi-a-GCST90016967		0.0627	0.0498	0.2077	104247	3011	finn-b-O15_MEMBR_PREMAT_RUPT
787	rs7155595	C	A	0.0539336	0.0118903	7.55e-06	14306	0.00143612	20.5718	genus Anaerotruncus id.2054	ebi-a-GCST90016967		0.0057	0.0292	0.8449	104247	3011	finn-b-O15_MEMBR_PREMAT_RUPT
788	rs7675045	A	T	-0.0497815	0.0110573	6.92e-06	14306	0.00141483	20.2664	genus Anaerotruncus id.2054	ebi-a-GCST90016967		-0.0349	0.0268	0.1928	104247	3011	finn-b-O15_MEMBR_PREMAT_RUPT
789	rs8005030	C	T	0.0554447	0.0117854	2.28e-06	14306	0.00154469	22.1295	genus Anaerotruncus id.2054	ebi-a-GCST90016967		0.0341	0.0283	0.2286	104247	3011	finn-b-O15_MEMBR_PREMAT_RUPT
790	rs9347879	T	C	0.050618	0.011049	4.22e-06	14306	0.0014649	20.9847	genus Anaerotruncus id.2054	ebi-a-GCST90016967		0.007	0.0267	0.793201	104247	3011	finn-b-O15_MEMBR_PREMAT_RUPT
791	rs11585893	A	G	-0.0740746	0.0147633	1.8e-06	14306	0.00175667	25.1716	genus Bacteroides id.918	ebi-a-GCST90016968		-0.0401	0.0314	0.2019	104247	3011	finn-b-O15_MEMBR_PREMAT_RUPT
792	rs13207588	A	G	-0.059205	0.0131195	7.48e-06	14306	0.0014215	20.362	genus Bacteroides id.918	ebi-a-GCST90016968		0.0118	0.0341	0.7302	104247	3011	finn-b-O15_MEMBR_PREMAT_RUPT
793	rs1340391	T	C	-0.0592004	0.0132244	6.73e-06	14306	0.00139885	20.0372	genus Bacteroides id.918	ebi-a-GCST90016968		0.0581	0.0391	0.1378	104247	3011	finn-b-O15_MEMBR_PREMAT_RUPT
794	rs17619981	T	G	0.0880978	0.0187002	2.69e-06	14306	0.00154898	22.191	genus Bacteroides id.918	ebi-a-GCST90016968		-0.0706	0.039	0.0704206	104247	3011	finn-b-O15_MEMBR_PREMAT_RUPT
795	rs2023437	T	C	-0.0782325	0.0167634	5.02e-06	14306	0.0015201	21.7766	genus Bacteroides id.918	ebi-a-GCST90016968		-0.0277	0.0406	0.496	104247	3011	finn-b-O15_MEMBR_PREMAT_RUPT
796	rs2366421	T	A	-0.0528153	0.0117124	7.65e-06	14306	0.00141936	20.3314	genus Bacteroides id.918	ebi-a-GCST90016968		-0.0557	0.0349	0.1104	104247	3011	finn-b-O15_MEMBR_PREMAT_RUPT
797	rs28757219	T	A	0.0818398	0.0170319	1.29e-06	14306	0.00161133	23.0857	genus Bacteroides id.918	ebi-a-GCST90016968		0.0411	0.0412	0.3186	104247	3011	finn-b-O15_MEMBR_PREMAT_RUPT
798	rs495004	C	G	-0.0607475	0.0129865	3.42e-06	14306	0.00152718	21.8782	genus Bacteroides id.918	ebi-a-GCST90016968		-0.0187	0.032	0.5587	104247	3011	finn-b-O15_MEMBR_PREMAT_RUPT
799	rs66474973	G	T	0.0812515	0.0164479	6.81e-07	14306	0.00170288	24.3995	genus Bacteroides id.918	ebi-a-GCST90016968		-0.0478	0.0443	0.2798	104247	3011	finn-b-O15_MEMBR_PREMAT_RUPT
800	rs66710942	T	C	-0.0488038	0.0107412	5.86e-06	14306	0.00144098	20.6415	genus Bacteroides id.918	ebi-a-GCST90016968		0.0058	0.0267	0.8297	104247	3011	finn-b-O15_MEMBR_PREMAT_RUPT
801	rs6795673	C	T	0.0538565	0.0105251	3.38e-07	14306	0.00182689	26.1796	genus Bacteroides id.918	ebi-a-GCST90016968		0.0571	0.0267	0.0320302	104247	3011	finn-b-O15_MEMBR_PREMAT_RUPT
802	rs9507307	C	T	0.0604456	0.0129128	2.13e-06	14306	0.00152935	21.9093	genus Bacteroides id.918	ebi-a-GCST90016968		-0.0073	0.0311	0.8137	104247	3011	finn-b-O15_MEMBR_PREMAT_RUPT
803	rs11155559	T	C	0.0956023	0.0212961	8.92e-06	14306	0.00140672	20.15	genus Barnesiella id.944	ebi-a-GCST90016969		0.0515	0.0462	0.2648	104247	3011	finn-b-O15_MEMBR_PREMAT_RUPT
804	rs113258194	A	G	0.098992	0.0214121	7.31e-06	14306	0.00149182	21.3708	genus Barnesiella id.944	ebi-a-GCST90016969		-0.0287	0.0451	0.5241	104247	3011	finn-b-O15_MEMBR_PREMAT_RUPT
805	rs12909713	C	T	-0.0550716	0.0120039	4.95e-06	14306	0.00146911	21.045	genus Barnesiella id.944	ebi-a-GCST90016969		-0.0048	0.0267	0.8585	104247	3011	finn-b-O15_MEMBR_PREMAT_RUPT
806	rs13242616	C	T	0.0583747	0.0123176	2.29e-06	14306	0.00156746	22.4562	genus Barnesiella id.944	ebi-a-GCST90016969		0.0108	0.029	0.710201	104247	3011	finn-b-O15_MEMBR_PREMAT_RUPT
807	rs199035	G	A	0.0559495	0.0119716	3e-06	14306	0.00152443	21.8387	genus Barnesiella id.944	ebi-a-GCST90016969		0.0186	0.0269	0.4888	104247	3011	finn-b-O15_MEMBR_PREMAT_RUPT
808	rs2057922	C	G	-0.0915241	0.0194623	3.83e-06	14306	0.00154345	22.1117	genus Barnesiella id.944	ebi-a-GCST90016969		0.0575	0.0365	0.1151	104247	3011	finn-b-O15_MEMBR_PREMAT_RUPT
809	rs2276875	A	G	-0.0697176	0.0139537	4.65e-07	14306	0.00174193	24.96	genus Barnesiella id.944	ebi-a-GCST90016969		-0.0058	0.0308	0.851	104247	3011	finn-b-O15_MEMBR_PREMAT_RUPT
810	rs2428166	G	A	-0.165859	0.0337309	8.51e-07	14306	0.00168722	24.1747	genus Barnesiella id.944	ebi-a-GCST90016969		-0.192	0.1145	0.09356	104247	3011	finn-b-O15_MEMBR_PREMAT_RUPT
811	rs28418786	C	G	-0.0791324	0.0174957	6.48e-06	14306	0.00142793	20.4543	genus Barnesiella id.944	ebi-a-GCST90016969		-0.0134	0.043	0.756201	104247	3011	finn-b-O15_MEMBR_PREMAT_RUPT
812	rs28479800	A	T	-0.09152	0.0210002	7.93e-06	14306	0.00132584	18.99	genus Barnesiella id.944	ebi-a-GCST90016969		0.0335	0.0429	0.4343	104247	3011	finn-b-O15_MEMBR_PREMAT_RUPT
813	rs35177866	A	G	0.0917125	0.0190133	2.95e-06	14306	0.00162375	23.2638	genus Barnesiella id.944	ebi-a-GCST90016969		-0.0115	0.0516	0.8231	104247	3011	finn-b-O15_MEMBR_PREMAT_RUPT
814	rs62251337	G	A	0.0690763	0.0149374	4.24e-06	14306	0.00149259	21.382	genus Barnesiella id.944	ebi-a-GCST90016969		-0.0378	0.0382	0.3226	104247	3011	finn-b-O15_MEMBR_PREMAT_RUPT
815	rs72684847	T	C	-0.114369	0.0253873	6.76e-06	14306	0.00141661	20.2919	genus Barnesiella id.944	ebi-a-GCST90016969		-0.0053	0.0511	0.9173	104247	3011	finn-b-O15_MEMBR_PREMAT_RUPT
816	rs76181748	C	T	-0.0778559	0.017164	6.78e-06	14306	0.00143616	20.5724	genus Barnesiella id.944	ebi-a-GCST90016969		0.0044	0.0319	0.889	104247	3011	finn-b-O15_MEMBR_PREMAT_RUPT
817	rs77455852	T	G	-0.0891491	0.0195601	3.16e-06	14306	0.00144992	20.7697	genus Barnesiella id.944	ebi-a-GCST90016969		-0.0251	0.0383	0.5133	104247	3011	finn-b-O15_MEMBR_PREMAT_RUPT
818	rs79795328	A	G	-0.0818645	0.0176441	4.23e-06	14306	0.00150252	21.5244	genus Barnesiella id.944	ebi-a-GCST90016969		0.0276	0.0386	0.475501	104247	3011	finn-b-O15_MEMBR_PREMAT_RUPT
819	rs10841473	G	C	-0.0624207	0.0129438	1.65e-06	14306	0.00162297	23.2527	genus Bifidobacterium id.436	ebi-a-GCST90016970		-0.0533	0.0317	0.0927897	104247	3011	finn-b-O15_MEMBR_PREMAT_RUPT
820	rs12022129	A	G	-0.0619356	0.0138937	8e-06	14306	0.00138715	19.8694	genus Bifidobacterium id.436	ebi-a-GCST90016970		-0.0655	0.03	0.0291602	104247	3011	finn-b-O15_MEMBR_PREMAT_RUPT
821	rs182549	T	C	-0.119703	0.0127294	1.28e-20	14306	0.00614327	88.4165	genus Bifidobacterium id.436	ebi-a-GCST90016970		-0.0212	0.0272	0.435	104247	3011	finn-b-O15_MEMBR_PREMAT_RUPT
822	rs2491158	A	G	-0.0712624	0.015983	8.05e-06	14306	0.00138766	19.8767	genus Bifidobacterium id.436	ebi-a-GCST90016970		-0.0355	0.0395	0.3691	104247	3011	finn-b-O15_MEMBR_PREMAT_RUPT
823	rs2686790	C	T	-0.070741	0.0157926	7.5e-06	14306	0.00140058	20.062	genus Bifidobacterium id.436	ebi-a-GCST90016970		-0.0584	0.0376	0.1206	104247	3011	finn-b-O15_MEMBR_PREMAT_RUPT
824	rs4567981	T	A	0.0562084	0.0117923	1.93e-06	14306	0.00158562	22.7167	genus Bifidobacterium id.436	ebi-a-GCST90016970		0.0105	0.0268	0.6946	104247	3011	finn-b-O15_MEMBR_PREMAT_RUPT
825	rs4957061	T	C	0.0534239	0.0117431	5.78e-06	14306	0.00144464	20.694	genus Bifidobacterium id.436	ebi-a-GCST90016970		0.0428	0.0272	0.1157	104247	3011	finn-b-O15_MEMBR_PREMAT_RUPT
826	rs540489	T	G	-0.0637641	0.0138746	5.19e-06	14306	0.00147419	21.1179	genus Bifidobacterium id.436	ebi-a-GCST90016970		-0.021	0.0351	0.548399	104247	3011	finn-b-O15_MEMBR_PREMAT_RUPT
827	rs55888705	A	G	0.0546319	0.0121139	6.67e-06	14306	0.00141968	20.3359	genus Bifidobacterium id.436	ebi-a-GCST90016970		-0.0306	0.0298	0.3036	104247	3011	finn-b-O15_MEMBR_PREMAT_RUPT
828	rs5746486	T	C	-0.0536216	0.0120801	9e-06	14306	0.00137538	19.7005	genus Bifidobacterium id.436	ebi-a-GCST90016970		-0.0218	0.0274	0.4278	104247	3011	finn-b-O15_MEMBR_PREMAT_RUPT
829	rs62181700	G	A	-0.0624643	0.0131205	2.17e-06	14306	0.00158182	22.6622	genus Bifidobacterium id.436	ebi-a-GCST90016970		0.0013	0.0311	0.9676	104247	3011	finn-b-O15_MEMBR_PREMAT_RUPT
830	rs7322849	T	C	0.112428	0.0201813	1.08e-08	14306	0.00216467	31.0306	genus Bifidobacterium id.436	ebi-a-GCST90016970		-0.011	0.0467	0.8146	104247	3011	finn-b-O15_MEMBR_PREMAT_RUPT
831	rs73797465	T	G	-0.0953566	0.0209236	4.38e-06	14306	0.00144971	20.7667	genus Bifidobacterium id.436	ebi-a-GCST90016970		-0.0028	0.0423	0.9467	104247	3011	finn-b-O15_MEMBR_PREMAT_RUPT
832	rs75344046	C	T	0.232354	0.0505979	4.86e-06	14306	0.0014719	21.085	genus Bifidobacterium id.436	ebi-a-GCST90016970		-0.07	0.063	0.2665	104247	3011	finn-b-O15_MEMBR_PREMAT_RUPT
833	rs76671854	C	G	-0.0846055	0.0184003	3.96e-06	14306	0.00147566	21.1391	genus Bifidobacterium id.436	ebi-a-GCST90016970		0.0101	0.0406	0.8044	104247	3011	finn-b-O15_MEMBR_PREMAT_RUPT
834	rs857444	C	T	0.0558234	0.0121219	3.57e-06	14306	0.00148023	21.2046	genus Bifidobacterium id.436	ebi-a-GCST90016970		-0.0162	0.0277	0.5586	104247	3011	finn-b-O15_MEMBR_PREMAT_RUPT
835	rs11069458	C	T	0.0680947	0.015503	7.72e-06	14306	0.00134676	19.2901	genus Bilophila id.3170	ebi-a-GCST90016971		-0.0159	0.0346	0.6466	104247	3011	finn-b-O15_MEMBR_PREMAT_RUPT
836	rs116261629	G	C	0.128112	0.0261358	8.62e-07	14306	0.00167672	24.0241	genus Bilophila id.3170	ebi-a-GCST90016971		0.0529	0.046	0.2496	104247	3011	finn-b-O15_MEMBR_PREMAT_RUPT
837	rs1241171	G	A	-0.0692654	0.0150148	4.24e-06	14306	0.00148535	21.2781	genus Bilophila id.3170	ebi-a-GCST90016971		0.0112	0.0379	0.768199	104247	3011	finn-b-O15_MEMBR_PREMAT_RUPT
838	rs1571225	T	C	-0.0826826	0.0170621	1.12e-06	14306	0.00163883	23.4802	genus Bilophila id.3170	ebi-a-GCST90016971		-0.0014	0.036	0.9683	104247	3011	finn-b-O15_MEMBR_PREMAT_RUPT
839	rs1917709	A	T	0.118509	0.026742	7.37e-06	14306	0.00137089	19.6361	genus Bilophila id.3170	ebi-a-GCST90016971		0.1234	0.077	0.1089	104247	3011	finn-b-O15_MEMBR_PREMAT_RUPT
840	rs1969927	A	G	-0.0564589	0.0126935	9.07e-06	14306	0.00138097	19.7807	genus Bilophila id.3170	ebi-a-GCST90016971		-0.022	0.0283	0.4369	104247	3011	finn-b-O15_MEMBR_PREMAT_RUPT
841	rs2713349	T	A	-0.0617228	0.0140174	8.63e-06	14306	0.00135347	19.3863	genus Bilophila id.3170	ebi-a-GCST90016971		0.0483	0.0293	0.0991996	104247	3011	finn-b-O15_MEMBR_PREMAT_RUPT
842	rs2728491	T	G	0.0627416	0.0139456	6.33e-06	14306	0.00141288	20.2384	genus Bilophila id.3170	ebi-a-GCST90016971		0.0447	0.0313	0.1531	104247	3011	finn-b-O15_MEMBR_PREMAT_RUPT
843	rs3827020	C	T	0.0766479	0.0160642	1.79e-06	14306	0.00158882	22.7626	genus Bilophila id.3170	ebi-a-GCST90016971		-0.038	0.0337	0.2594	104247	3011	finn-b-O15_MEMBR_PREMAT_RUPT
844	rs4798126	G	A	0.073288	0.016799	7.15e-06	14306	0.00132863	19.03	genus Bilophila id.3170	ebi-a-GCST90016971		0.0018	0.0338	0.9566	104247	3011	finn-b-O15_MEMBR_PREMAT_RUPT
845	rs542415	T	C	-0.0613623	0.0133436	4.71e-06	14306	0.00147604	21.1445	genus Bilophila id.3170	ebi-a-GCST90016971		0.011	0.0274	0.6899	104247	3011	finn-b-O15_MEMBR_PREMAT_RUPT
846	rs60178956	G	A	-0.0624818	0.0141485	8.06e-06	14306	0.00136137	19.4996	genus Bilophila id.3170	ebi-a-GCST90016971		0.0306	0.0319	0.3369	104247	3011	finn-b-O15_MEMBR_PREMAT_RUPT
847	rs6793291	A	C	-0.112729	0.0241633	3.11e-06	14306	0.00151908	21.762	genus Bilophila id.3170	ebi-a-GCST90016971		-0.0475	0.0603	0.4314	104247	3011	finn-b-O15_MEMBR_PREMAT_RUPT
848	rs72676854	T	C	0.123209	0.026882	5.62e-06	14306	0.00146624	21.004	genus Bilophila id.3170	ebi-a-GCST90016971		0.1153	0.0599	0.0543501	104247	3011	finn-b-O15_MEMBR_PREMAT_RUPT
849	rs7802841	A	C	-0.0670097	0.0137701	1.77e-06	14306	0.00165259	23.6778	genus Bilophila id.3170	ebi-a-GCST90016971		0.0004	0.0291	0.9901	104247	3011	finn-b-O15_MEMBR_PREMAT_RUPT
850	rs8013541	A	T	-0.0571991	0.0125673	5.48e-06	14306	0.00144593	20.7126	genus Bilophila id.3170	ebi-a-GCST90016971		0.0245	0.027	0.3636	104247	3011	finn-b-O15_MEMBR_PREMAT_RUPT
851	rs9899990	A	G	-0.102702	0.0233878	9.07e-06	14306	0.0013461	19.2805	genus Bilophila id.3170	ebi-a-GCST90016971		0.0396	0.0486	0.4156	104247	3011	finn-b-O15_MEMBR_PREMAT_RUPT
852	rs115043014	G	A	-0.206605	0.043992	5.19e-06	14306	0.00153938	22.0533	genus Blautia id.1992	ebi-a-GCST90016972		-0.063	0.103	0.541	104247	3011	finn-b-O15_MEMBR_PREMAT_RUPT
853	rs2788271	G	T	0.0575596	0.0133492	7.16e-06	14306	0.00129791	18.5894	genus Blautia id.1992	ebi-a-GCST90016972		0.0156	0.0351	0.6574	104247	3011	finn-b-O15_MEMBR_PREMAT_RUPT
854	rs10084203	G	A	-0.0549699	0.0123563	8.59e-06	14306	0.00138151	19.7885	genus Butyricicoccus id.2055	ebi-a-GCST90016973		-0.0023	0.0399	0.9542	104247	3011	finn-b-O15_MEMBR_PREMAT_RUPT
855	rs12034718	G	A	-0.0701199	0.0158213	9.58e-06	14306	0.00137115	19.6398	genus Butyricicoccus id.2055	ebi-a-GCST90016973		0.0009	0.0321	0.9784	104247	3011	finn-b-O15_MEMBR_PREMAT_RUPT
856	rs12585793	T	C	-0.262206	0.0564729	5.79e-06	14306	0.00150464	21.5548	genus Butyricicoccus id.2055	ebi-a-GCST90016973		-0.0876	0.0794	0.2697	104247	3011	finn-b-O15_MEMBR_PREMAT_RUPT
857	rs2017189	T	G	0.0506956	0.011024	3.87e-06	14306	0.00147605	21.1447	genus Butyricicoccus id.2055	ebi-a-GCST90016973		-0.0586	0.0268	0.0286398	104247	3011	finn-b-O15_MEMBR_PREMAT_RUPT
858	rs4962426	T	G	-0.0614216	0.0135979	7.38e-06	14306	0.00142417	20.4004	genus Butyricicoccus id.2055	ebi-a-GCST90016973		0.0268	0.0338	0.428	104247	3011	finn-b-O15_MEMBR_PREMAT_RUPT
859	rs56221232	T	C	0.0828027	0.0167401	7.62e-07	14306	0.00170731	24.4631	genus Butyricicoccus id.2055	ebi-a-GCST90016973		0.0046	0.0446	0.9187	104247	3011	finn-b-O15_MEMBR_PREMAT_RUPT
860	rs62478070	T	G	0.224039	0.0494959	5.94e-06	14306	0.00143011	20.4856	genus Butyricicoccus id.2055	ebi-a-GCST90016973		0.0287	0.0854	0.737199	104247	3011	finn-b-O15_MEMBR_PREMAT_RUPT
861	rs7322368	C	T	-0.0815733	0.0183167	5.52e-06	14306	0.00138446	19.8308	genus Butyricicoccus id.2055	ebi-a-GCST90016973		-0.0006	0.0465	0.9894	104247	3011	finn-b-O15_MEMBR_PREMAT_RUPT
862	rs75238760	T	A	0.0619423	0.0139942	6.8e-06	14306	0.00136762	19.5892	genus Butyricicoccus id.2055	ebi-a-GCST90016973		-0.0282	0.0395	0.4756	104247	3011	finn-b-O15_MEMBR_PREMAT_RUPT
863	rs11228830	A	G	0.135265	0.0298411	6.55e-06	14306	0.00143417	20.5438	genus Butyricimonas id.945	ebi-a-GCST90016974		-0.0572	0.0488	0.2412	104247	3011	finn-b-O15_MEMBR_PREMAT_RUPT
864	rs113054641	G	A	-0.144881	0.0274574	1.74e-07	14306	0.00194241	27.8383	genus Butyricimonas id.945	ebi-a-GCST90016974		0.0184	0.0644	0.7751	104247	3011	finn-b-O15_MEMBR_PREMAT_RUPT
865	rs12304031	G	A	-0.0862781	0.0196846	6.7e-06	14306	0.00134106	19.2082	genus Butyricimonas id.945	ebi-a-GCST90016974		-0.0019	0.0408	0.9629	104247	3011	finn-b-O15_MEMBR_PREMAT_RUPT
866	rs12458763	A	C	0.122037	0.0269587	6.37e-06	14306	0.00143036	20.4892	genus Butyricimonas id.945	ebi-a-GCST90016974		0.0065	0.0648	0.9199	104247	3011	finn-b-O15_MEMBR_PREMAT_RUPT
867	rs1862649	G	A	0.113124	0.0248176	4.76e-06	14306	0.00145024	20.7744	genus Butyricimonas id.945	ebi-a-GCST90016974		0.0139	0.0532	0.7939	104247	3011	finn-b-O15_MEMBR_PREMAT_RUPT
868	rs2114713	G	T	0.062721	0.0138998	6.88e-06	14306	0.00142126	20.3586	genus Butyricimonas id.945	ebi-a-GCST90016974		0.016	0.0269	0.5509	104247	3011	finn-b-O15_MEMBR_PREMAT_RUPT
869	rs2642760	G	C	0.0713357	0.0145396	8.58e-07	14306	0.00167981	24.0685	genus Butyricimonas id.945	ebi-a-GCST90016974		-0.0255	0.0289	0.3777	104247	3011	finn-b-O15_MEMBR_PREMAT_RUPT
870	rs270727	G	C	-0.0694173	0.0150795	5.38e-06	14306	0.00147911	21.1885	genus Butyricimonas id.945	ebi-a-GCST90016974		-0.0097	0.0287	0.735401	104247	3011	finn-b-O15_MEMBR_PREMAT_RUPT
871	rs326049	C	G	0.0759694	0.0167617	8.19e-06	14306	0.00143384	20.5391	genus Butyricimonas id.945	ebi-a-GCST90016974		0.0112	0.0305	0.713199	104247	3011	finn-b-O15_MEMBR_PREMAT_RUPT
872	rs62130338	A	G	0.0732608	0.0158324	3.9e-06	14306	0.00149445	21.4086	genus Butyricimonas id.945	ebi-a-GCST90016974		-0.0119	0.0282	0.6726	104247	3011	finn-b-O15_MEMBR_PREMAT_RUPT
873	rs62390301	T	C	-0.0872983	0.0174893	7.42e-07	14306	0.00173857	24.9119	genus Butyricimonas id.945	ebi-a-GCST90016974		0.0294	0.0335	0.3794	104247	3011	finn-b-O15_MEMBR_PREMAT_RUPT
874	rs7083431	A	C	0.0703539	0.0144439	8.85e-07	14306	0.00165565	23.7217	genus Butyricimonas id.945	ebi-a-GCST90016974		-0.0417	0.0301	0.1653	104247	3011	finn-b-O15_MEMBR_PREMAT_RUPT
875	rs71428626	G	T	-0.133188	0.0289905	4.8e-06	14306	0.0014732	21.1037	genus Butyricimonas id.945	ebi-a-GCST90016974		-0.0754	0.0755	0.3179	104247	3011	finn-b-O15_MEMBR_PREMAT_RUPT
876	rs72814525	A	G	0.0664154	0.0149766	8.25e-06	14306	0.00137276	19.663	genus Butyricimonas id.945	ebi-a-GCST90016974		-0.0429	0.0313	0.1706	104247	3011	finn-b-O15_MEMBR_PREMAT_RUPT
877	rs782080	A	T	-0.0653488	0.0137974	2.23e-06	14306	0.0015656	22.4295	genus Butyricimonas id.945	ebi-a-GCST90016974		0.0331	0.0271	0.221	104247	3011	finn-b-O15_MEMBR_PREMAT_RUPT
878	rs78453362	A	G	-0.14948	0.0327073	4.06e-06	14306	0.00145789	20.8841	genus Butyricimonas id.945	ebi-a-GCST90016974		0.0197	0.0847	0.8161	104247	3011	finn-b-O15_MEMBR_PREMAT_RUPT
879	rs9657374	C	T	0.0680719	0.0148172	4.5e-06	14306	0.00147314	21.1029	genus Butyricimonas id.945	ebi-a-GCST90016974		-0.0226	0.0293	0.4408	104247	3011	finn-b-O15_MEMBR_PREMAT_RUPT
880	rs1007475	G	T	0.118065	0.0261271	7.92e-06	14306	0.00142535	20.4173	genus Butyrivibrio id.1993	ebi-a-GCST90016975		-0.0122	0.03	0.684	104247	3011	finn-b-O15_MEMBR_PREMAT_RUPT
881	rs11761679	T	C	0.154775	0.0321539	2.2e-06	14306	0.00161701	23.1672	genus Butyrivibrio id.1993	ebi-a-GCST90016975		0.1007	0.0385	0.00900492	104247	3011	finn-b-O15_MEMBR_PREMAT_RUPT
882	rs142855850	A	G	0.205013	0.0457138	6.86e-06	14306	0.00140391	20.1098	genus Butyrivibrio id.1993	ebi-a-GCST90016975		0.0592	0.0451	0.1891	104247	3011	finn-b-O15_MEMBR_PREMAT_RUPT
883	rs16934069	T	C	-0.133784	0.0299444	8.86e-06	14306	0.00139333	19.958	genus Butyrivibrio id.1993	ebi-a-GCST90016975		-0.0143	0.0354	0.6863	104247	3011	finn-b-O15_MEMBR_PREMAT_RUPT
884	rs16941336	C	T	0.127488	0.0267936	1.53e-06	14306	0.00158005	22.6368	genus Butyrivibrio id.1993	ebi-a-GCST90016975		0.0064	0.0317	0.8396	104247	3011	finn-b-O15_MEMBR_PREMAT_RUPT
885	rs17163238	G	A	0.140987	0.0309117	5.51e-06	14306	0.00145199	20.7994	genus Butyrivibrio id.1993	ebi-a-GCST90016975		0.0152	0.0338	0.6531	104247	3011	finn-b-O15_MEMBR_PREMAT_RUPT
886	rs4537857	T	C	-0.12459	0.0260992	1.8e-06	14306	0.00159039	22.7851	genus Butyrivibrio id.1993	ebi-a-GCST90016975		-0.0057	0.0283	0.8414	104247	3011	finn-b-O15_MEMBR_PREMAT_RUPT
887	rs486484	A	G	-0.108349	0.0240008	6.61e-06	14306	0.00142253	20.3769	genus Butyrivibrio id.1993	ebi-a-GCST90016975		-0.0135	0.0272	0.6208	104247	3011	finn-b-O15_MEMBR_PREMAT_RUPT
888	rs4928024	G	A	0.17471	0.0389333	8.19e-06	14306	0.00140561	20.1341	genus Butyrivibrio id.1993	ebi-a-GCST90016975		0.0633	0.0344	0.0654003	104247	3011	finn-b-O15_MEMBR_PREMAT_RUPT
889	rs72723662	C	T	0.224078	0.0449336	7.86e-07	14306	0.00173534	24.8654	genus Butyrivibrio id.1993	ebi-a-GCST90016975		0.0061	0.0393	0.8766	104247	3011	finn-b-O15_MEMBR_PREMAT_RUPT
890	rs7412979	C	G	0.186779	0.0389112	1.71e-06	14306	0.00160801	23.0381	genus Butyrivibrio id.1993	ebi-a-GCST90016975		-0.0249	0.0492	0.6134	104247	3011	finn-b-O15_MEMBR_PREMAT_RUPT
891	rs74622183	A	G	-0.201027	0.0428204	2.46e-06	14306	0.00153823	22.0367	genus Butyrivibrio id.1993	ebi-a-GCST90016975		-0.0456	0.0465	0.3264	104247	3011	finn-b-O15_MEMBR_PREMAT_RUPT
892	rs77356209	T	C	0.216874	0.0483299	6.66e-06	14306	0.00140558	20.1336	genus Butyrivibrio id.1993	ebi-a-GCST90016975		0.0394	0.0639	0.5378	104247	3011	finn-b-O15_MEMBR_PREMAT_RUPT
893	rs7752361	G	A	0.11923	0.0239975	7.69e-07	14306	0.00172255	24.6819	genus Butyrivibrio id.1993	ebi-a-GCST90016975		0.0248	0.0267	0.353	104247	3011	finn-b-O15_MEMBR_PREMAT_RUPT
894	rs7763512	A	G	-0.119846	0.0253367	3.11e-06	14306	0.00156153	22.371	genus Butyrivibrio id.1993	ebi-a-GCST90016975		0.0537	0.0271	0.0471097	104247	3011	finn-b-O15_MEMBR_PREMAT_RUPT
895	rs9349693	G	A	-0.117973	0.0259861	5.55e-06	14306	0.0014386	20.6074	genus Butyrivibrio id.1993	ebi-a-GCST90016975		0.0303	0.0294	0.3024	104247	3011	finn-b-O15_MEMBR_PREMAT_RUPT
896	rs10090365	G	A	0.0834413	0.0180989	4.17e-06	14306	0.00148353	21.2519	genus Candidatus Soleaferrea id.11350	ebi-a-GCST90016976		-0.0148	0.0267	0.5776	104247	3011	finn-b-O15_MEMBR_PREMAT_RUPT
897	rs10108780	A	G	-0.092834	0.0199807	3.64e-06	14306	0.00150668	21.584	genus Candidatus Soleaferrea id.11350	ebi-a-GCST90016976		0.0033	0.0312	0.9164	104247	3011	finn-b-O15_MEMBR_PREMAT_RUPT
898	rs10809135	C	T	-0.0834858	0.0182426	5.47e-06	14306	0.00146183	20.9407	genus Candidatus Soleaferrea id.11350	ebi-a-GCST90016976		-0.0254	0.0272	0.3511	104247	3011	finn-b-O15_MEMBR_PREMAT_RUPT
899	rs11153159	G	C	-0.12805	0.0285446	4.42e-06	14306	0.0014047	20.121	genus Candidatus Soleaferrea id.11350	ebi-a-GCST90016976		-0.0611	0.0384	0.1114	104247	3011	finn-b-O15_MEMBR_PREMAT_RUPT
900	rs12500231	T	A	-0.0813853	0.0182696	7.68e-06	14306	0.0013852	19.8414	genus Candidatus Soleaferrea id.11350	ebi-a-GCST90016976		-0.0129	0.0269	0.6297	104247	3011	finn-b-O15_MEMBR_PREMAT_RUPT
901	rs2193878	T	A	0.228255	0.0509241	9.46e-06	14306	0.00140238	20.0878	genus Candidatus Soleaferrea id.11350	ebi-a-GCST90016976		0.0215	0.0863	0.8036	104247	3011	finn-b-O15_MEMBR_PREMAT_RUPT
902	rs36155147	T	C	-0.104966	0.0240995	5.41e-06	14306	0.0013243	18.968	genus Candidatus Soleaferrea id.11350	ebi-a-GCST90016976		-0.0088	0.029	0.760901	104247	3011	finn-b-O15_MEMBR_PREMAT_RUPT
903	rs386526	G	C	-0.0818459	0.0180086	8.33e-06	14306	0.00144175	20.6525	genus Candidatus Soleaferrea id.11350	ebi-a-GCST90016976		-0.0365	0.0263	0.1646	104247	3011	finn-b-O15_MEMBR_PREMAT_RUPT
904	rs4294381	C	T	-0.112197	0.023186	1.37e-06	14306	0.00163411	23.4126	genus Candidatus Soleaferrea id.11350	ebi-a-GCST90016976		-0.0183	0.0364	0.615	104247	3011	finn-b-O15_MEMBR_PREMAT_RUPT
905	rs4678258	T	C	0.0986136	0.0215646	5.53e-06	14306	0.00145962	20.9088	genus Candidatus Soleaferrea id.11350	ebi-a-GCST90016976		-0.047	0.0314	0.1341	104247	3011	finn-b-O15_MEMBR_PREMAT_RUPT
906	rs6489992	A	G	-0.0840437	0.0187031	7.89e-06	14306	0.00140946	20.1894	genus Candidatus Soleaferrea id.11350	ebi-a-GCST90016976		-0.0178	0.0276	0.519	104247	3011	finn-b-O15_MEMBR_PREMAT_RUPT
907	rs6494306	A	G	-0.0969304	0.0214221	5.8e-06	14306	0.00142908	20.4708	genus Candidatus Soleaferrea id.11350	ebi-a-GCST90016976		0.0091	0.0285	0.7504	104247	3011	finn-b-O15_MEMBR_PREMAT_RUPT
908	rs6881988	C	G	0.0819131	0.018185	9.23e-06	14306	0.00141627	20.2871	genus Candidatus Soleaferrea id.11350	ebi-a-GCST90016976		0.028	0.0268	0.2973	104247	3011	finn-b-O15_MEMBR_PREMAT_RUPT
909	rs7400877	C	T	0.0951085	0.0212799	9.29e-06	14306	0.00139436	19.9728	genus Candidatus Soleaferrea id.11350	ebi-a-GCST90016976		0.0151	0.0325	0.6422	104247	3011	finn-b-O15_MEMBR_PREMAT_RUPT
910	rs830151	A	G	-0.194561	0.0347932	4.26e-08	14306	0.002181	31.2653	genus Candidatus Soleaferrea id.11350	ebi-a-GCST90016976		0	0.0567	0.9999	104247	3011	finn-b-O15_MEMBR_PREMAT_RUPT
911	rs9973954	G	A	-0.0892075	0.0195401	5.95e-06	14306	0.00145479	20.8396	genus Candidatus Soleaferrea id.11350	ebi-a-GCST90016976		-0.0415	0.028	0.1375	104247	3011	finn-b-O15_MEMBR_PREMAT_RUPT
912	rs12404911	C	T	0.140717	0.0304142	2.8e-06	14306	0.00149408	21.4032	genus Catenibacterium id.2153	ebi-a-GCST90016977		0.035	0.0343	0.3084	104247	3011	finn-b-O15_MEMBR_PREMAT_RUPT
913	rs212393	A	G	0.135254	0.0286209	3.62e-06	14306	0.00155861	22.3292	genus Catenibacterium id.2153	ebi-a-GCST90016977		0.028	0.0329	0.394	104247	3011	finn-b-O15_MEMBR_PREMAT_RUPT
914	rs73128290	A	G	0.129726	0.0284563	4.29e-06	14306	0.0014506	20.7796	genus Catenibacterium id.2153	ebi-a-GCST90016977		0.0132	0.0292	0.6522	104247	3011	finn-b-O15_MEMBR_PREMAT_RUPT
915	rs7742829	C	T	0.11411	0.0251099	5.61e-06	14306	0.00144149	20.6489	genus Catenibacterium id.2153	ebi-a-GCST90016977		-0.0387	0.027	0.1513	104247	3011	finn-b-O15_MEMBR_PREMAT_RUPT
916	rs10461257	A	G	-0.0551969	0.0122069	6.51e-06	14306	0.00142718	20.4436	genus Christensenellaceae R 7group id.11283	ebi-a-GCST90016978		0.002	0.0285	0.9442	104247	3011	finn-b-O15_MEMBR_PREMAT_RUPT
917	rs17081797	A	G	-0.0904325	0.0204253	3.34e-06	14306	0.00136836	19.5998	genus Christensenellaceae R 7group id.11283	ebi-a-GCST90016978		-0.0604	0.0542	0.2651	104247	3011	finn-b-O15_MEMBR_PREMAT_RUPT
918	rs60954665	T	G	0.049815	0.0110787	7.13e-06	14306	0.00141127	20.2154	genus Christensenellaceae R 7group id.11283	ebi-a-GCST90016978		0.0002	0.0266	0.9925	104247	3011	finn-b-O15_MEMBR_PREMAT_RUPT
919	rs62132810	A	G	-0.0828853	0.0179623	5.67e-06	14306	0.00148617	21.2897	genus Christensenellaceae R 7group id.11283	ebi-a-GCST90016978		-0.048	0.0385	0.2132	104247	3011	finn-b-O15_MEMBR_PREMAT_RUPT
920	rs62190261	A	C	0.0958394	0.0214723	8.74e-06	14306	0.00139062	19.9191	genus Christensenellaceae R 7group id.11283	ebi-a-GCST90016978		-0.0453	0.0476	0.3414	104247	3011	finn-b-O15_MEMBR_PREMAT_RUPT
921	rs62467127	C	T	0.114108	0.0251983	3.25e-06	14306	0.00143136	20.5035	genus Christensenellaceae R 7group id.11283	ebi-a-GCST90016978		-0.1397	0.085	0.1003	104247	3011	finn-b-O15_MEMBR_PREMAT_RUPT
922	rs73952017	C	T	-0.0862164	0.0194354	8.46e-06	14306	0.00137366	19.6758	genus Christensenellaceae R 7group id.11283	ebi-a-GCST90016978		-0.0533	0.0441	0.2275	104247	3011	finn-b-O15_MEMBR_PREMAT_RUPT
923	rs78521377	C	T	0.124992	0.0274797	5.61e-06	14306	0.00144409	20.6862	genus Christensenellaceae R 7group id.11283	ebi-a-GCST90016978		0.0173	0.0775	0.8234	104247	3011	finn-b-O15_MEMBR_PREMAT_RUPT
924	rs79150079	C	A	0.121547	0.0270977	9.42e-06	14306	0.00140441	20.117	genus Christensenellaceae R 7group id.11283	ebi-a-GCST90016978		0.0119	0.053	0.8225	104247	3011	finn-b-O15_MEMBR_PREMAT_RUPT
925	rs892686	A	G	0.0514099	0.011136	3.97e-06	14306	0.00148755	21.3096	genus Christensenellaceae R 7group id.11283	ebi-a-GCST90016978		-0.0367	0.0268	0.171	104247	3011	finn-b-O15_MEMBR_PREMAT_RUPT
926	rs999354	T	A	0.0580248	0.0117185	7.01e-07	14306	0.00171089	24.5145	genus Christensenellaceae R 7group id.11283	ebi-a-GCST90016978		0.0553	0.0275	0.0445297	104247	3011	finn-b-O15_MEMBR_PREMAT_RUPT
927	rs10074000	T	C	-0.102648	0.0227508	7e-06	14306	0.00142093	20.3539	genus Clostridium innocuum group id.14397	ebi-a-GCST90016979		0.0041	0.0277	0.883	104247	3011	finn-b-O15_MEMBR_PREMAT_RUPT
928	rs10506058	A	G	0.0997048	0.0221926	8.92e-06	14306	0.00140892	20.1816	genus Clostridium innocuum group id.14397	ebi-a-GCST90016979		0.0112	0.027	0.6784	104247	3011	finn-b-O15_MEMBR_PREMAT_RUPT
929	rs1942371	G	A	-0.157938	0.034187	4.06e-06	14306	0.00148966	21.3398	genus Clostridium innocuum group id.14397	ebi-a-GCST90016979		0.0481	0.041	0.2406	104247	3011	finn-b-O15_MEMBR_PREMAT_RUPT
930	rs1948423	T	A	-0.108859	0.023425	3.49e-06	14306	0.00150729	21.5928	genus Clostridium innocuum group id.14397	ebi-a-GCST90016979		0.0079	0.0281	0.778599	104247	3011	finn-b-O15_MEMBR_PREMAT_RUPT
931	rs40656	C	T	0.142664	0.0311021	8.62e-06	14306	0.00146856	21.0372	genus Clostridium innocuum group id.14397	ebi-a-GCST90016979		0.0124	0.0334	0.7114	104247	3011	finn-b-O15_MEMBR_PREMAT_RUPT
932	rs4869133	G	A	-0.180591	0.0409505	7.24e-06	14306	0.00135758	19.4452	genus Clostridium innocuum group id.14397	ebi-a-GCST90016979		0.023	0.0351	0.5132	104247	3011	finn-b-O15_MEMBR_PREMAT_RUPT
933	rs61267978	T	C	0.14708	0.0320875	5.59e-06	14306	0.00146649	21.0075	genus Clostridium innocuum group id.14397	ebi-a-GCST90016979		0.0102	0.0409	0.8033	104247	3011	finn-b-O15_MEMBR_PREMAT_RUPT
934	rs6577484	G	A	0.160425	0.0360857	8.41e-06	14306	0.00137961	19.7612	genus Clostridium innocuum group id.14397	ebi-a-GCST90016979		0.0664	0.0446	0.1361	104247	3011	finn-b-O15_MEMBR_PREMAT_RUPT
935	rs6890185	C	T	-0.113424	0.0233137	1.12e-06	14306	0.00165178	23.6661	genus Clostridium innocuum group id.14397	ebi-a-GCST90016979		-0.0271	0.0285	0.3425	104247	3011	finn-b-O15_MEMBR_PREMAT_RUPT
936	rs71564433	T	A	-0.126746	0.0274657	7.8e-06	14306	0.00148636	21.2925	genus Clostridium innocuum group id.14397	ebi-a-GCST90016979		0.01	0.0338	0.766099	104247	3011	finn-b-O15_MEMBR_PREMAT_RUPT
937	rs77845139	A	G	-0.114993	0.0257186	8.41e-06	14306	0.00139548	19.9888	genus Clostridium innocuum group id.14397	ebi-a-GCST90016979		-0.0377	0.0313	0.2279	104247	3011	finn-b-O15_MEMBR_PREMAT_RUPT
938	rs11264403	G	A	-0.139061	0.0334454	7.76e-06	14306	0.00120697	17.2853	genus Clostridium sensustricto1 id.1873	ebi-a-GCST90016980		-0.0381	0.0508	0.453401	104247	3011	finn-b-O15_MEMBR_PREMAT_RUPT
939	rs115807074	A	G	-0.22736	0.0492575	4.32e-06	14306	0.00148703	21.3021	genus Clostridium sensustricto1 id.1873	ebi-a-GCST90016980		-0.0135	0.1312	0.9183	104247	3011	finn-b-O15_MEMBR_PREMAT_RUPT
940	rs11586026	A	T	0.110967	0.0250498	8.85e-06	14306	0.00136983	19.6209	genus Clostridium sensustricto1 id.1873	ebi-a-GCST90016980		-0.0161	0.074	0.8276	104247	3011	finn-b-O15_MEMBR_PREMAT_RUPT
941	rs116847295	C	T	0.110021	0.0246032	4.58e-06	14306	0.00139586	19.9943	genus Clostridium sensustricto1 id.1873	ebi-a-GCST90016980		-0.1201	0.0398	0.002573	104247	3011	finn-b-O15_MEMBR_PREMAT_RUPT
942	rs12341505	G	A	0.0810718	0.0180121	4.82e-06	14306	0.00141409	20.2558	genus Clostridium sensustricto1 id.1873	ebi-a-GCST90016980		-0.1077	0.0454	0.0176299	104247	3011	finn-b-O15_MEMBR_PREMAT_RUPT
943	rs12490337	C	G	-0.0616879	0.0137581	7.49e-06	14306	0.00140331	20.1012	genus Clostridium sensustricto1 id.1873	ebi-a-GCST90016980		-0.0214	0.0333	0.520701	104247	3011	finn-b-O15_MEMBR_PREMAT_RUPT
944	rs2795528	G	A	-0.184315	0.0392204	2.72e-06	14306	0.00154138	22.0819	genus Clostridium sensustricto1 id.1873	ebi-a-GCST90016980		-0.036	0.0584	0.5382	104247	3011	finn-b-O15_MEMBR_PREMAT_RUPT
945	rs2817172	C	T	0.058139	0.0124492	2.77e-06	14306	0.0015222	21.8068	genus Clostridium sensustricto1 id.1873	ebi-a-GCST90016980		0.0041	0.0273	0.8797	104247	3011	finn-b-O15_MEMBR_PREMAT_RUPT
946	rs550843	T	C	-0.0783246	0.0169209	2.05e-06	14306	0.00149548	21.4234	genus Clostridium sensustricto1 id.1873	ebi-a-GCST90016980		0.0549	0.0297	0.0650594	104247	3011	finn-b-O15_MEMBR_PREMAT_RUPT
947	rs10890671	C	T	0.0537401	0.0118848	6.52e-06	14306	0.00142717	20.4434	genus Collinsella id.815	ebi-a-GCST90016981		0.0455	0.0269	0.0910395	104247	3011	finn-b-O15_MEMBR_PREMAT_RUPT
948	rs11597285	G	T	-0.0537947	0.0120548	9.38e-06	14306	0.00139007	19.9112	genus Collinsella id.815	ebi-a-GCST90016981		0.0358	0.0273	0.189	104247	3011	finn-b-O15_MEMBR_PREMAT_RUPT
949	rs12921100	T	A	-0.0563759	0.0127019	8.23e-06	14306	0.0013751	19.6965	genus Collinsella id.815	ebi-a-GCST90016981		0.0181	0.0301	0.5478	104247	3011	finn-b-O15_MEMBR_PREMAT_RUPT
950	rs1496626	T	C	-0.0722307	0.01616	6.78e-06	14306	0.00139456	19.9756	genus Collinsella id.815	ebi-a-GCST90016981		-0.0601	0.0391	0.1248	104247	3011	finn-b-O15_MEMBR_PREMAT_RUPT
951	rs149807560	C	A	-0.104264	0.0235841	7.1e-06	14306	0.00136433	19.542	genus Collinsella id.815	ebi-a-GCST90016981		-0.0007	0.0526	0.9892	104247	3011	finn-b-O15_MEMBR_PREMAT_RUPT
952	rs2103510	G	A	0.0786551	0.0168217	2.42e-06	14306	0.00152592	21.8602	genus Collinsella id.815	ebi-a-GCST90016981		0.026	0.0417	0.5336	104247	3011	finn-b-O15_MEMBR_PREMAT_RUPT
953	rs2671662	G	C	0.0567751	0.011945	2.22e-06	14306	0.00157667	22.5883	genus Collinsella id.815	ebi-a-GCST90016981		-0.0276	0.0269	0.3055	104247	3011	finn-b-O15_MEMBR_PREMAT_RUPT
954	rs59414781	C	G	0.0668866	0.0149773	9.15e-06	14306	0.00139216	19.9412	genus Collinsella id.815	ebi-a-GCST90016981		0.0367	0.0391	0.3475	104247	3011	finn-b-O15_MEMBR_PREMAT_RUPT
955	rs62448871	C	A	-0.0540309	0.0120324	6.78e-06	14306	0.00140751	20.1613	genus Collinsella id.815	ebi-a-GCST90016981		-0.0238	0.0269	0.3773	104247	3011	finn-b-O15_MEMBR_PREMAT_RUPT
956	rs73052258	G	A	0.0930178	0.0202658	1.72e-06	14306	0.00147044	21.0641	genus Collinsella id.815	ebi-a-GCST90016981		0.023	0.0499	0.6446	104247	3011	finn-b-O15_MEMBR_PREMAT_RUPT
957	rs75672793	A	G	-0.108908	0.0240522	6.14e-06	14306	0.0014311	20.4998	genus Collinsella id.815	ebi-a-GCST90016981		-0.0982	0.0639	0.1243	104247	3011	finn-b-O15_MEMBR_PREMAT_RUPT
958	rs9541268	C	A	0.09597	0.0197312	8.79e-07	14306	0.00165093	23.6539	genus Collinsella id.815	ebi-a-GCST90016981		0.0494	0.0467	0.2902	104247	3011	finn-b-O15_MEMBR_PREMAT_RUPT
959	rs11532348	C	T	-0.103931	0.0226826	5.71e-06	14306	0.00146538	20.9915	genus Coprobacter id.949	ebi-a-GCST90016982		-0.0582	0.0378	0.1232	104247	3011	finn-b-O15_MEMBR_PREMAT_RUPT
960	rs12684609	T	C	0.100827	0.0220366	6.1e-06	14306	0.0014612	20.9317	genus Coprobacter id.949	ebi-a-GCST90016982		0.0528	0.0337	0.1172	104247	3011	finn-b-O15_MEMBR_PREMAT_RUPT
961	rs12996055	A	C	0.0921817	0.0209405	8.08e-06	14306	0.00135272	19.3756	genus Coprobacter id.949	ebi-a-GCST90016982		-0.0057	0.0305	0.8528	104247	3011	finn-b-O15_MEMBR_PREMAT_RUPT
962	rs143662916	C	T	0.253264	0.0540141	3.07e-06	14306	0.00153443	21.9822	genus Coprobacter id.949	ebi-a-GCST90016982		-0.0272	0.0797	0.733301	104247	3011	finn-b-O15_MEMBR_PREMAT_RUPT
963	rs189356	G	A	0.0781125	0.0171916	6.26e-06	14306	0.001441	20.6418	genus Coprobacter id.949	ebi-a-GCST90016982		-0.0159	0.027	0.5549	104247	3011	finn-b-O15_MEMBR_PREMAT_RUPT
964	rs213863	T	C	0.0887412	0.0188377	2.35e-06	14306	0.00154883	22.1888	genus Coprobacter id.949	ebi-a-GCST90016982		0.0188	0.0279	0.5	104247	3011	finn-b-O15_MEMBR_PREMAT_RUPT
965	rs305411	A	G	0.129218	0.0264518	1.01e-06	14306	0.0016653	23.8602	genus Coprobacter id.949	ebi-a-GCST90016982		0.0315	0.0444	0.4775	104247	3011	finn-b-O15_MEMBR_PREMAT_RUPT
966	rs3828477	G	T	-0.0912179	0.019569	2.89e-06	14306	0.00151651	21.7251	genus Coprobacter id.949	ebi-a-GCST90016982		0.024	0.0281	0.3942	104247	3011	finn-b-O15_MEMBR_PREMAT_RUPT
967	rs5011652	C	G	-0.0899597	0.020001	5.51e-06	14306	0.00141208	20.227	genus Coprobacter id.949	ebi-a-GCST90016982		0.0001	0.0301	0.997	104247	3011	finn-b-O15_MEMBR_PREMAT_RUPT
968	rs55672356	T	A	-0.193354	0.0413815	2.74e-06	14306	0.00152375	21.829	genus Coprobacter id.949	ebi-a-GCST90016982		0.033	0.076	0.664401	104247	3011	finn-b-O15_MEMBR_PREMAT_RUPT
969	rs72821405	T	C	-0.147365	0.0319978	4.76e-06	14306	0.00148043	21.2074	genus Coprobacter id.949	ebi-a-GCST90016982		-0.109	0.0473	0.0213599	104247	3011	finn-b-O15_MEMBR_PREMAT_RUPT
970	rs74919520	G	A	0.125703	0.0276296	5.76e-06	14306	0.00144476	20.6958	genus Coprobacter id.949	ebi-a-GCST90016982		0.0341	0.0431	0.4292	104247	3011	finn-b-O15_MEMBR_PREMAT_RUPT
971	rs76001613	C	G	0.21591	0.0493019	9.13e-06	14306	0.00133881	19.176	genus Coprobacter id.949	ebi-a-GCST90016982		-0.0261	0.0539	0.628001	104247	3011	finn-b-O15_MEMBR_PREMAT_RUPT
972	rs1010560	C	A	0.0580232	0.0122722	1.96e-06	14306	0.00156014	22.351	genus Coprococcus1 id.11301	ebi-a-GCST90016983		0.0223	0.0303	0.461	104247	3011	finn-b-O15_MEMBR_PREMAT_RUPT
973	rs12794898	G	T	0.0903299	0.0197212	4.92e-06	14306	0.00146434	20.9766	genus Coprococcus1 id.11301	ebi-a-GCST90016983		0.0154	0.0404	0.7026	104247	3011	finn-b-O15_MEMBR_PREMAT_RUPT
974	rs12886051	G	C	-0.0521782	0.0118051	8.01e-06	14306	0.00136373	19.5334	genus Coprococcus1 id.11301	ebi-a-GCST90016983		-0.0292	0.0293	0.32	104247	3011	finn-b-O15_MEMBR_PREMAT_RUPT
975	rs1519491	T	C	0.0499197	0.0113558	8.95e-06	14306	0.00134898	19.3218	genus Coprococcus1 id.11301	ebi-a-GCST90016983		0.0213	0.0274	0.4377	104247	3011	finn-b-O15_MEMBR_PREMAT_RUPT
976	rs1576241	A	G	-0.0510343	0.0109535	3.33e-06	14306	0.0015151	21.7049	genus Coprococcus1 id.11301	ebi-a-GCST90016983		-0.0115	0.0275	0.677599	104247	3011	finn-b-O15_MEMBR_PREMAT_RUPT
977	rs2907920	G	A	-0.0561173	0.0126824	7.65e-06	14306	0.00136672	19.5763	genus Coprococcus1 id.11301	ebi-a-GCST90016983		0.0163	0.0297	0.582599	104247	3011	finn-b-O15_MEMBR_PREMAT_RUPT
978	rs4277593	G	A	-0.0585649	0.0109914	1.14e-07	14306	0.00198057	28.3863	genus Coprococcus1 id.11301	ebi-a-GCST90016983		-0.0172	0.0272	0.527	104247	3011	finn-b-O15_MEMBR_PREMAT_RUPT
979	rs56405618	A	G	-0.08963	0.0186508	1.57e-06	14306	0.00161173	23.0914	genus Coprococcus1 id.11301	ebi-a-GCST90016983		-0.0205	0.0418	0.6231	104247	3011	finn-b-O15_MEMBR_PREMAT_RUPT
980	rs73031725	T	C	0.167591	0.0355224	1.98e-06	14306	0.00155347	22.2554	genus Coprococcus1 id.11301	ebi-a-GCST90016983		0.073	0.0764	0.3389	104247	3011	finn-b-O15_MEMBR_PREMAT_RUPT
981	rs73167075	T	C	0.0573137	0.0127573	8.57e-06	14306	0.00140886	20.1808	genus Coprococcus1 id.11301	ebi-a-GCST90016983		-0.0505	0.0328	0.1234	104247	3011	finn-b-O15_MEMBR_PREMAT_RUPT
982	rs74101919	T	C	-0.0718988	0.0144651	1.03e-06	14306	0.00172398	24.7024	genus Coprococcus1 id.11301	ebi-a-GCST90016983		0.0143	0.0432	0.740699	104247	3011	finn-b-O15_MEMBR_PREMAT_RUPT
983	rs7784490	G	C	0.0518543	0.0113136	4.55e-06	14306	0.00146627	21.0043	genus Coprococcus1 id.11301	ebi-a-GCST90016983		0.0447	0.0283	0.1143	104247	3011	finn-b-O15_MEMBR_PREMAT_RUPT
984	rs946513	T	C	-0.205899	0.0460018	8.62e-06	14306	0.0013984	20.0308	genus Coprococcus1 id.11301	ebi-a-GCST90016983		-0.0111	0.0648	0.8636	104247	3011	finn-b-O15_MEMBR_PREMAT_RUPT
985	rs10070053	A	G	0.0594312	0.0135375	7.65e-06	14306	0.00134539	19.2704	genus Coprococcus2 id.11302	ebi-a-GCST90016984		0.0035	0.0271	0.8985	104247	3011	finn-b-O15_MEMBR_PREMAT_RUPT
986	rs12634070	T	C	0.0736486	0.0164921	9.95e-06	14306	0.00139205	19.9396	genus Coprococcus2 id.11302	ebi-a-GCST90016984		0.0303	0.0306	0.3222	104247	3011	finn-b-O15_MEMBR_PREMAT_RUPT
987	rs1958519	T	A	0.0665288	0.0138558	1.58e-06	14306	0.00160893	23.0513	genus Coprococcus2 id.11302	ebi-a-GCST90016984		0.0262	0.0268	0.3277	104247	3011	finn-b-O15_MEMBR_PREMAT_RUPT
988	rs2482516	C	T	0.0754415	0.0164619	4.72e-06	14306	0.0014659	20.9991	genus Coprococcus2 id.11302	ebi-a-GCST90016984		-0.0099	0.0323	0.758799	104247	3011	finn-b-O15_MEMBR_PREMAT_RUPT
989	rs35890118	A	G	-0.066536	0.0147661	8.26e-06	14306	0.00141725	20.3012	genus Coprococcus2 id.11302	ebi-a-GCST90016984		0.0241	0.0307	0.4323	104247	3011	finn-b-O15_MEMBR_PREMAT_RUPT
990	rs59936925	A	T	0.117085	0.0233995	9.38e-07	14306	0.00174708	25.0339	genus Coprococcus2 id.11302	ebi-a-GCST90016984		-0.0249	0.0428	0.5611	104247	3011	finn-b-O15_MEMBR_PREMAT_RUPT
991	rs61823518	A	C	-0.0955381	0.0215724	6.68e-06	14306	0.00136912	19.6108	genus Coprococcus2 id.11302	ebi-a-GCST90016984		0.0309	0.0434	0.4766	104247	3011	finn-b-O15_MEMBR_PREMAT_RUPT
992	rs6677933	C	T	-0.0804405	0.0164216	1.19e-06	14306	0.00167445	23.9915	genus Coprococcus2 id.11302	ebi-a-GCST90016984		0.0207	0.0377	0.5829	104247	3011	finn-b-O15_MEMBR_PREMAT_RUPT
993	rs72680320	T	C	-0.0649382	0.013919	2.27e-06	14306	0.00151917	21.7632	genus Coprococcus2 id.11302	ebi-a-GCST90016984		0.0089	0.0284	0.752899	104247	3011	finn-b-O15_MEMBR_PREMAT_RUPT
994	rs9426473	A	G	0.0727361	0.0161662	6.31e-06	14306	0.00141303	20.2406	genus Coprococcus2 id.11302	ebi-a-GCST90016984		-0.0017	0.0305	0.9548	104247	3011	finn-b-O15_MEMBR_PREMAT_RUPT
995	rs10810043	G	A	-0.0515518	0.0115923	9.27e-06	14306	0.00138048	19.7737	genus Coprococcus3 id.11303	ebi-a-GCST90016985		0.0183	0.0285	0.5196	104247	3011	finn-b-O15_MEMBR_PREMAT_RUPT
996	rs11077359	C	T	0.0645443	0.0148833	9.64e-06	14306	0.00131289	18.8043	genus Coprococcus3 id.11303	ebi-a-GCST90016985		-0.0648	0.036	0.0721905	104247	3011	finn-b-O15_MEMBR_PREMAT_RUPT
997	rs11080344	C	T	0.0516921	0.0113054	4.79e-06	14306	0.00145923	20.9033	genus Coprococcus3 id.11303	ebi-a-GCST90016985		0.0088	0.0268	0.7416	104247	3011	finn-b-O15_MEMBR_PREMAT_RUPT
998	rs13247359	G	A	0.051211	0.0113031	7.33e-06	14306	0.00143282	20.5244	genus Coprococcus3 id.11303	ebi-a-GCST90016985		0.0364	0.0269	0.176	104247	3011	finn-b-O15_MEMBR_PREMAT_RUPT
999	rs13394391	C	T	-0.0709302	0.0150918	2.2e-06	14306	0.00154167	22.0861	genus Coprococcus3 id.11303	ebi-a-GCST90016985		-0.0209	0.037	0.5724	104247	3011	finn-b-O15_MEMBR_PREMAT_RUPT
1000	rs178271	C	T	-0.145257	0.0294239	7.81e-07	14306	0.00170065	24.3676	genus Coprococcus3 id.11303	ebi-a-GCST90016985		-0.2509	0.106	0.01798	104247	3011	finn-b-O15_MEMBR_PREMAT_RUPT
1001	rs4575475	A	G	-0.0619514	0.0137787	7.04e-06	14306	0.00141109	20.2127	genus Coprococcus3 id.11303	ebi-a-GCST90016985		0.0114	0.0318	0.7209	104247	3011	finn-b-O15_MEMBR_PREMAT_RUPT
1002	rs62481985	G	C	-0.0582385	0.0115052	4.18e-07	14306	0.00178787	25.6195	genus Coprococcus3 id.11303	ebi-a-GCST90016985		-0.0048	0.0271	0.8592	104247	3011	finn-b-O15_MEMBR_PREMAT_RUPT
1003	rs7521171	A	G	0.0596434	0.0129279	4.32e-06	14306	0.00148561	21.2818	genus Coprococcus3 id.11303	ebi-a-GCST90016985		-0.04	0.029	0.168	104247	3011	finn-b-O15_MEMBR_PREMAT_RUPT
1004	rs8100692	T	C	0.0577411	0.0113476	4.16e-07	14306	0.00180659	25.8882	genus Coprococcus3 id.11303	ebi-a-GCST90016985		-0.0039	0.0268	0.8835	104247	3011	finn-b-O15_MEMBR_PREMAT_RUPT
1005	rs112893842	T	C	0.11381	0.0232806	1.45e-06	14306	0.00166774	23.8953	genus Defluviitaleaceae UCG011 id.11287	ebi-a-GCST90016986		-0.0259	0.0468	0.579499	104247	3011	finn-b-O15_MEMBR_PREMAT_RUPT
1006	rs1582238	C	T	-0.0805036	0.0167257	1.57e-06	14306	0.00161674	23.1633	genus Defluviitaleaceae UCG011 id.11287	ebi-a-GCST90016986		0.0076	0.0279	0.7861	104247	3011	finn-b-O15_MEMBR_PREMAT_RUPT
1007	rs28696126	T	A	0.106503	0.0238473	6.63e-06	14306	0.00139226	19.9427	genus Defluviitaleaceae UCG011 id.11287	ebi-a-GCST90016986		-0.0048	0.0401	0.9056	104247	3011	finn-b-O15_MEMBR_PREMAT_RUPT
1008	rs2892880	G	A	0.0817755	0.0181686	6.83e-06	14306	0.00141407	20.2555	genus Defluviitaleaceae UCG011 id.11287	ebi-a-GCST90016986		-0.0125	0.0309	0.685001	104247	3011	finn-b-O15_MEMBR_PREMAT_RUPT
1009	rs4344384	T	G	-0.0715978	0.0156309	4.83e-06	14306	0.00146446	20.9783	genus Defluviitaleaceae UCG011 id.11287	ebi-a-GCST90016986		-0.0126	0.0268	0.6388	104247	3011	finn-b-O15_MEMBR_PREMAT_RUPT
1010	rs4677103	A	G	0.0977912	0.0197263	9.6e-07	14306	0.00171492	24.5724	genus Defluviitaleaceae UCG011 id.11287	ebi-a-GCST90016986		0.007	0.0353	0.8426	104247	3011	finn-b-O15_MEMBR_PREMAT_RUPT
1011	rs55658617	T	C	0.174369	0.0362226	2.15e-06	14306	0.00161718	23.1696	genus Defluviitaleaceae UCG011 id.11287	ebi-a-GCST90016986		-0.007	0.0731	0.9235	104247	3011	finn-b-O15_MEMBR_PREMAT_RUPT
1012	rs72731813	C	T	-0.147383	0.0293796	4.33e-07	14306	0.00175599	25.1618	genus Defluviitaleaceae UCG011 id.11287	ebi-a-GCST90016986		-0.0021	0.0629	0.9728	104247	3011	finn-b-O15_MEMBR_PREMAT_RUPT
1013	rs9608282	T	G	0.142939	0.0299793	2.52e-06	14306	0.00158654	22.7299	genus Defluviitaleaceae UCG011 id.11287	ebi-a-GCST90016986		-0.0818	0.0737	0.2667	104247	3011	finn-b-O15_MEMBR_PREMAT_RUPT
1014	rs9725395	A	G	-0.13834	0.029554	3.52e-06	14306	0.00152926	21.908	genus Defluviitaleaceae UCG011 id.11287	ebi-a-GCST90016986		0.0156	0.0422	0.710799	104247	3011	finn-b-O15_MEMBR_PREMAT_RUPT
1015	rs11160353	A	T	0.0691756	0.0147285	2.7e-06	14306	0.00153958	22.0561	genus Desulfovibrio id.3173	ebi-a-GCST90016987		-0.0207	0.0271	0.4464	104247	3011	finn-b-O15_MEMBR_PREMAT_RUPT
1016	rs12031543	T	C	-0.127185	0.0281887	6.55e-06	14306	0.00142097	20.3545	genus Desulfovibrio id.3173	ebi-a-GCST90016987		-0.0061	0.0392	0.8769	104247	3011	finn-b-O15_MEMBR_PREMAT_RUPT
1017	rs13066142	G	A	0.119141	0.0250891	3.79e-06	14306	0.0015738	22.5471	genus Desulfovibrio id.3173	ebi-a-GCST90016987		-0.0386	0.0463	0.4051	104247	3011	finn-b-O15_MEMBR_PREMAT_RUPT
1018	rs16863365	A	G	0.109402	0.0226964	1.79e-06	14306	0.00162149	23.2314	genus Desulfovibrio id.3173	ebi-a-GCST90016987		-0.0042	0.0635	0.9474	104247	3011	finn-b-O15_MEMBR_PREMAT_RUPT
1019	rs2032031	G	A	0.0654931	0.0148681	9.14e-06	14306	0.00135448	19.4008	genus Desulfovibrio id.3173	ebi-a-GCST90016987		-0.0095	0.0268	0.7227	104247	3011	finn-b-O15_MEMBR_PREMAT_RUPT
1020	rs2456226	A	C	0.0854927	0.0172749	8.55e-07	14306	0.00170909	24.4887	genus Desulfovibrio id.3173	ebi-a-GCST90016987		-0.0114	0.0289	0.692299	104247	3011	finn-b-O15_MEMBR_PREMAT_RUPT
1021	rs2590913	A	G	-0.154496	0.0339396	6.65e-06	14306	0.00144635	20.7186	genus Desulfovibrio id.3173	ebi-a-GCST90016987		0.0928	0.0614	0.1312	104247	3011	finn-b-O15_MEMBR_PREMAT_RUPT
1022	rs2853179	T	C	-0.0811971	0.0174234	2.42e-06	14306	0.00151579	21.7147	genus Desulfovibrio id.3173	ebi-a-GCST90016987		0.0327	0.0319	0.3047	104247	3011	finn-b-O15_MEMBR_PREMAT_RUPT
1023	rs4797774	A	G	-0.212582	0.0470044	5.64e-06	14306	0.0014277	20.451	genus Desulfovibrio id.3173	ebi-a-GCST90016987		-0.0105	0.0671	0.8762	104247	3011	finn-b-O15_MEMBR_PREMAT_RUPT
1024	rs6580353	T	C	0.0770979	0.0169735	4.94e-06	14306	0.00144012	20.6292	genus Desulfovibrio id.3173	ebi-a-GCST90016987		0.03	0.0336	0.3719	104247	3011	finn-b-O15_MEMBR_PREMAT_RUPT
1025	rs72647089	T	G	-0.106594	0.0239337	8.3e-06	14306	0.0013846	19.8328	genus Desulfovibrio id.3173	ebi-a-GCST90016987		-0.1076	0.0492	0.0288098	104247	3011	finn-b-O15_MEMBR_PREMAT_RUPT
1026	rs10138457	T	C	-0.113054	0.0261933	7.88e-06	14306	0.00130049	18.6265	genus Dialister id.2183	ebi-a-GCST90016988		0.0661	0.046	0.1507	104247	3011	finn-b-O15_MEMBR_PREMAT_RUPT
1027	rs10938938	A	G	0.0773514	0.0170915	7.37e-06	14306	0.00142967	20.4793	genus Dialister id.2183	ebi-a-GCST90016988		-0.0479	0.0366	0.1909	104247	3011	finn-b-O15_MEMBR_PREMAT_RUPT
1028	rs11071887	T	C	0.0662403	0.0146315	5.91e-06	14306	0.00143063	20.493	genus Dialister id.2183	ebi-a-GCST90016988		0.0429	0.0286	0.1347	104247	3011	finn-b-O15_MEMBR_PREMAT_RUPT
1029	rs11166701	G	A	-0.0655301	0.013186	5.51e-07	14306	0.00172341	24.6942	genus Dialister id.2183	ebi-a-GCST90016988		0.0118	0.0268	0.6594	104247	3011	finn-b-O15_MEMBR_PREMAT_RUPT
1030	rs2314294	T	C	0.0865932	0.0193719	8.08e-06	14306	0.00139476	19.9785	genus Dialister id.2183	ebi-a-GCST90016988		0.0102	0.039	0.793299	104247	3011	finn-b-O15_MEMBR_PREMAT_RUPT
1031	rs2435610	A	C	0.0647132	0.0143314	5.93e-06	14306	0.00142322	20.3867	genus Dialister id.2183	ebi-a-GCST90016988		0.0111	0.0307	0.7173	104247	3011	finn-b-O15_MEMBR_PREMAT_RUPT
1032	rs4747450	C	A	0.0668509	0.0147685	5.84e-06	14306	0.00143022	20.4871	genus Dialister id.2183	ebi-a-GCST90016988		0.0245	0.0321	0.4455	104247	3011	finn-b-O15_MEMBR_PREMAT_RUPT
1033	rs4753063	A	G	0.0596297	0.0130052	4.86e-06	14306	0.00146736	21.0199	genus Dialister id.2183	ebi-a-GCST90016988		0.0311	0.0268	0.2452	104247	3011	finn-b-O15_MEMBR_PREMAT_RUPT
1034	rs517089	T	A	0.076227	0.0170411	5.14e-06	14306	0.00139668	20.0061	genus Dialister id.2183	ebi-a-GCST90016988		0.0221	0.0354	0.5315	104247	3011	finn-b-O15_MEMBR_PREMAT_RUPT
1035	rs75416973	A	G	0.0727223	0.016451	9.46e-06	14306	0.00136408	19.5384	genus Dialister id.2183	ebi-a-GCST90016988		0.0535	0.0324	0.0987006	104247	3011	finn-b-O15_MEMBR_PREMAT_RUPT
1036	rs764177	C	A	-0.0601454	0.0135366	9.61e-06	14306	0.00137806	19.739	genus Dialister id.2183	ebi-a-GCST90016988		0.0273	0.0278	0.3248	104247	3011	finn-b-O15_MEMBR_PREMAT_RUPT
1037	rs76680460	G	A	-0.161296	0.0364332	8.19e-06	14306	0.00136817	19.5971	genus Dialister id.2183	ebi-a-GCST90016988		-0.0367	0.0664	0.581	104247	3011	finn-b-O15_MEMBR_PREMAT_RUPT
1038	rs11150408	G	T	-0.0488254	0.0109063	7.06e-06	14306	0.00139898	20.039	genus Dorea id.1997	ebi-a-GCST90016989		-0.0163	0.0269	0.5454	104247	3011	finn-b-O15_MEMBR_PREMAT_RUPT
1039	rs12216169	T	A	0.0881722	0.0193683	5.33e-06	14306	0.00144655	20.7214	genus Dorea id.1997	ebi-a-GCST90016989		-0.0551	0.0421	0.1911	104247	3011	finn-b-O15_MEMBR_PREMAT_RUPT
1040	rs12537781	T	C	-0.055544	0.0125223	9.15e-06	14306	0.00137338	19.6719	genus Dorea id.1997	ebi-a-GCST90016989		-0.036	0.0314	0.2519	104247	3011	finn-b-O15_MEMBR_PREMAT_RUPT
1041	rs13279148	G	A	0.0715309	0.0150878	2.25e-06	14306	0.00156868	22.4737	genus Dorea id.1997	ebi-a-GCST90016989		0.067	0.0425	0.1144	104247	3011	finn-b-O15_MEMBR_PREMAT_RUPT
1042	rs1899291	T	C	-0.0697217	0.0150285	4.57e-06	14306	0.00150222	21.5201	genus Dorea id.1997	ebi-a-GCST90016989		0.0505	0.0368	0.1695	104247	3011	finn-b-O15_MEMBR_PREMAT_RUPT
1043	rs3005511	G	A	-0.0516127	0.0112852	5.29e-06	14306	0.00145996	20.9138	genus Dorea id.1997	ebi-a-GCST90016989		0.0255	0.0292	0.382	104247	3011	finn-b-O15_MEMBR_PREMAT_RUPT
1044	rs345219	G	T	0.0497368	0.0112621	8.8e-06	14306	0.00136147	19.501	genus Dorea id.1997	ebi-a-GCST90016989		-0.01	0.027	0.711001	104247	3011	finn-b-O15_MEMBR_PREMAT_RUPT
1045	rs3752849	G	A	0.163846	0.036608	7.68e-06	14306	0.00139828	20.029	genus Dorea id.1997	ebi-a-GCST90016989		-0.1183	0.0617	0.0551595	104247	3011	finn-b-O15_MEMBR_PREMAT_RUPT
1046	rs4793307	C	T	0.0574165	0.0122472	4.01e-06	14306	0.00153396	21.9755	genus Dorea id.1997	ebi-a-GCST90016989		-0.0292	0.0315	0.3535	104247	3011	finn-b-O15_MEMBR_PREMAT_RUPT
1047	rs62503162	A	G	-0.0974091	0.0194379	7.47e-07	14306	0.00175235	25.1096	genus Dorea id.1997	ebi-a-GCST90016989		0.0982	0.0656	0.1348	104247	3011	finn-b-O15_MEMBR_PREMAT_RUPT
1048	rs62583469	T	A	-0.0634136	0.0142227	5.78e-06	14306	0.00138765	19.8765	genus Dorea id.1997	ebi-a-GCST90016989		-0.0056	0.039	0.8853	104247	3011	finn-b-O15_MEMBR_PREMAT_RUPT
1049	rs73729431	C	T	-0.13745	0.0299983	3.17e-06	14306	0.00146535	20.9911	genus Dorea id.1997	ebi-a-GCST90016989		-0.0165	0.0939	0.8604	104247	3011	finn-b-O15_MEMBR_PREMAT_RUPT
1050	rs112205261	T	C	-0.188618	0.0403613	3.35e-06	14306	0.00152425	21.8361	genus Eggerthella id.819	ebi-a-GCST90016990		0.0519	0.049	0.2897	104247	3011	finn-b-O15_MEMBR_PREMAT_RUPT
1051	rs13070736	A	C	-0.121331	0.0272024	7.62e-06	14306	0.0013887	19.8915	genus Eggerthella id.819	ebi-a-GCST90016990		0.0193	0.036	0.5915	104247	3011	finn-b-O15_MEMBR_PREMAT_RUPT
1052	rs1784446	A	G	-0.0907728	0.0198096	5.23e-06	14306	0.00146556	20.9942	genus Eggerthella id.819	ebi-a-GCST90016990		0.0502	0.0266	0.0591793	104247	3011	finn-b-O15_MEMBR_PREMAT_RUPT
1053	rs2223081	A	G	-0.102572	0.0221108	3.89e-06	14306	0.00150203	21.5173	genus Eggerthella id.819	ebi-a-GCST90016990		-0.0084	0.0298	0.779399	104247	3011	finn-b-O15_MEMBR_PREMAT_RUPT
1054	rs2240838	G	A	-0.0980582	0.0197653	7.36e-07	14306	0.0017175	24.6094	genus Eggerthella id.819	ebi-a-GCST90016990		0.0033	0.027	0.9034	104247	3011	finn-b-O15_MEMBR_PREMAT_RUPT
1055	rs3851328	G	T	0.107774	0.0236527	4.18e-06	14306	0.00144917	20.759	genus Eggerthella id.819	ebi-a-GCST90016990		-0.0013	0.0323	0.9681	104247	3011	finn-b-O15_MEMBR_PREMAT_RUPT
1056	rs4985746	A	G	-0.110522	0.0247653	5.71e-06	14306	0.00139023	19.9136	genus Eggerthella id.819	ebi-a-GCST90016990		0.0152	0.0444	0.732099	104247	3011	finn-b-O15_MEMBR_PREMAT_RUPT
1057	rs6430926	T	C	-0.0879736	0.0197127	8.37e-06	14306	0.00139024	19.9137	genus Eggerthella id.819	ebi-a-GCST90016990		0.0077	0.027	0.776301	104247	3011	finn-b-O15_MEMBR_PREMAT_RUPT
1058	rs67490567	T	C	0.108495	0.0245457	8.94e-06	14306	0.00136382	19.5348	genus Eggerthella id.819	ebi-a-GCST90016990		0.0176	0.0309	0.569101	104247	3011	finn-b-O15_MEMBR_PREMAT_RUPT
1059	rs76663501	C	T	0.175349	0.0378576	4.83e-06	14306	0.00149738	21.4506	genus Eggerthella id.819	ebi-a-GCST90016990		-0.0326	0.0599	0.5864	104247	3011	finn-b-O15_MEMBR_PREMAT_RUPT
1060	rs11027642	C	T	0.129006	0.0284844	4.92e-06	14306	0.00143174	20.509	genus Eisenbergiella id.11304	ebi-a-GCST90016991		0.0435	0.0382	0.254	104247	3011	finn-b-O15_MEMBR_PREMAT_RUPT
1061	rs11079158	T	C	0.100627	0.022546	7.35e-06	14306	0.00139049	19.9172	genus Eisenbergiella id.11304	ebi-a-GCST90016991		0.0217	0.0325	0.504001	104247	3011	finn-b-O15_MEMBR_PREMAT_RUPT
1062	rs11938607	C	T	-0.0978125	0.0216636	8.22e-06	14306	0.00142295	20.3829	genus Eisenbergiella id.11304	ebi-a-GCST90016991		0.0044	0.0306	0.8864	104247	3011	finn-b-O15_MEMBR_PREMAT_RUPT
1063	rs12257723	A	C	-0.0952742	0.0211569	8.85e-06	14306	0.00141551	20.2762	genus Eisenbergiella id.11304	ebi-a-GCST90016991		-0.0193	0.0285	0.4985	104247	3011	finn-b-O15_MEMBR_PREMAT_RUPT
1064	rs12278566	T	A	-0.121065	0.0251658	1.65e-06	14306	0.00161509	23.1396	genus Eisenbergiella id.11304	ebi-a-GCST90016991		-0.0171	0.0303	0.5723	104247	3011	finn-b-O15_MEMBR_PREMAT_RUPT
1065	rs12710729	C	A	0.0893384	0.0199069	9.84e-06	14306	0.00140585	20.1376	genus Eisenbergiella id.11304	ebi-a-GCST90016991		-0.0183	0.0285	0.5209	104247	3011	finn-b-O15_MEMBR_PREMAT_RUPT
1066	rs13258851	A	G	0.137001	0.0302124	7.75e-06	14306	0.00143527	20.5597	genus Eisenbergiella id.11304	ebi-a-GCST90016991		-0.0524	0.0385	0.1733	104247	3011	finn-b-O15_MEMBR_PREMAT_RUPT
1067	rs1508033	A	C	0.091546	0.0195787	3.23e-06	14306	0.00152591	21.86	genus Eisenbergiella id.11304	ebi-a-GCST90016991		0.0208	0.0291	0.4752	104247	3011	finn-b-O15_MEMBR_PREMAT_RUPT
1068	rs1553971	T	G	0.120965	0.0263054	5.27e-06	14306	0.00147594	21.1431	genus Eisenbergiella id.11304	ebi-a-GCST90016991		0.0217	0.0322	0.5007	104247	3011	finn-b-O15_MEMBR_PREMAT_RUPT
1069	rs2683098	T	C	-0.107319	0.022515	2.24e-06	14306	0.00158563	22.7169	genus Eisenbergiella id.11304	ebi-a-GCST90016991		0.0486	0.0325	0.1346	104247	3011	finn-b-O15_MEMBR_PREMAT_RUPT
1070	rs3812426	A	G	-0.106447	0.0224159	2.72e-06	14306	0.00157381	22.5473	genus Eisenbergiella id.11304	ebi-a-GCST90016991		-0.0606	0.0369	0.1008	104247	3011	finn-b-O15_MEMBR_PREMAT_RUPT
1071	rs4462860	G	A	0.0939071	0.0201104	4.16e-06	14306	0.00152186	21.8019	genus Eisenbergiella id.11304	ebi-a-GCST90016991		0.0145	0.0275	0.5981	104247	3011	finn-b-O15_MEMBR_PREMAT_RUPT
1072	rs10098492	T	C	0.132323	0.0293688	6.41e-06	14306	0.00141698	20.2973	genus Enterorhabdus id.820	ebi-a-GCST90016992		-0.0645	0.0574	0.2615	104247	3011	finn-b-O15_MEMBR_PREMAT_RUPT
1073	rs11098863	A	T	0.0966008	0.0162677	3.06e-09	14306	0.00245879	35.2572	genus Enterorhabdus id.820	ebi-a-GCST90016992		0.0242	0.0266	0.364	104247	3011	finn-b-O15_MEMBR_PREMAT_RUPT
1074	rs114731706	T	G	0.182308	0.0382298	2.17e-06	14306	0.00158708	22.7377	genus Enterorhabdus id.820	ebi-a-GCST90016992		-0.0082	0.0747	0.9121	104247	3011	finn-b-O15_MEMBR_PREMAT_RUPT
1075	rs2051957	C	T	0.0843291	0.0189864	8.9e-06	14306	0.00137706	19.7246	genus Enterorhabdus id.820	ebi-a-GCST90016992		0.0145	0.0335	0.6658	104247	3011	finn-b-O15_MEMBR_PREMAT_RUPT
1076	rs3017103	G	A	-0.0980897	0.0208995	2.94e-06	14306	0.00153741	22.0249	genus Enterorhabdus id.820	ebi-a-GCST90016992		-0.0269	0.034	0.4287	104247	3011	finn-b-O15_MEMBR_PREMAT_RUPT
1077	rs73331712	T	C	0.26199	0.055123	4.85e-06	14306	0.00157652	22.5862	genus Enterorhabdus id.820	ebi-a-GCST90016992		0.0188	0.0665	0.777499	104247	3011	finn-b-O15_MEMBR_PREMAT_RUPT
1078	rs77655283	G	A	0.132988	0.0298306	5.88e-06	14306	0.00138733	19.8719	genus Enterorhabdus id.820	ebi-a-GCST90016992		0.0072	0.0523	0.8902	104247	3011	finn-b-O15_MEMBR_PREMAT_RUPT
1079	rs7923280	T	A	-0.0860019	0.0169148	5.24e-07	14306	0.00180376	25.8477	genus Enterorhabdus id.820	ebi-a-GCST90016992		-0.0168	0.0299	0.5742	104247	3011	finn-b-O15_MEMBR_PREMAT_RUPT
1080	rs9470637	T	A	0.0755513	0.0166263	5.7e-06	14306	0.00144128	20.6458	genus Enterorhabdus id.820	ebi-a-GCST90016992		-0.007	0.0268	0.7939	104247	3011	finn-b-O15_MEMBR_PREMAT_RUPT
1081	rs1434153	G	A	-0.0684526	0.0152443	6.85e-06	14306	0.00140746	20.1606	genus Erysipelatoclostridium id.11381	ebi-a-GCST90016993		-0.0117	0.027	0.664401	104247	3011	finn-b-O15_MEMBR_PREMAT_RUPT
1082	rs16936671	C	T	-0.0968026	0.0217883	6.04e-06	14306	0.00137788	19.7363	genus Erysipelatoclostridium id.11381	ebi-a-GCST90016993		-0.0872	0.0387	0.0243899	104247	3011	finn-b-O15_MEMBR_PREMAT_RUPT
1083	rs17804233	C	T	0.0662914	0.0144203	4.59e-06	14306	0.00147505	21.1303	genus Erysipelatoclostridium id.11381	ebi-a-GCST90016993		0.0066	0.0268	0.8056	104247	3011	finn-b-O15_MEMBR_PREMAT_RUPT
1084	rs2901723	A	C	-0.0641339	0.0144295	8.79e-06	14306	0.00137897	19.752	genus Erysipelatoclostridium id.11381	ebi-a-GCST90016993		0.0051	0.0269	0.8502	104247	3011	finn-b-O15_MEMBR_PREMAT_RUPT
1085	rs340991	A	G	-0.0740482	0.0158891	3.75e-06	14306	0.00151584	21.7155	genus Erysipelatoclostridium id.11381	ebi-a-GCST90016993		0.0515	0.0301	0.08682	104247	3011	finn-b-O15_MEMBR_PREMAT_RUPT
1086	rs34528142	C	G	-0.0875551	0.0195556	6.13e-06	14306	0.00139925	20.0429	genus Erysipelatoclostridium id.11381	ebi-a-GCST90016993		0.0231	0.0334	0.488599	104247	3011	finn-b-O15_MEMBR_PREMAT_RUPT
1087	rs3804326	A	G	0.14147	0.0336352	9.85e-06	14306	0.00123505	17.6881	genus Erysipelatoclostridium id.11381	ebi-a-GCST90016993		0.0043	0.0626	0.9446	104247	3011	finn-b-O15_MEMBR_PREMAT_RUPT
1088	rs45480394	T	G	-0.0687134	0.0151835	7.66e-06	14306	0.00142955	20.4776	genus Erysipelatoclostridium id.11381	ebi-a-GCST90016993		-0.005	0.0279	0.8579	104247	3011	finn-b-O15_MEMBR_PREMAT_RUPT
1089	rs4697572	A	G	-0.0810636	0.0163308	7.59e-07	14306	0.00171938	24.6363	genus Erysipelatoclostridium id.11381	ebi-a-GCST90016993		-0.0092	0.0335	0.7833	104247	3011	finn-b-O15_MEMBR_PREMAT_RUPT
1090	rs58236560	G	T	-0.111157	0.0234426	2.16e-06	14306	0.00156914	22.4803	genus Erysipelatoclostridium id.11381	ebi-a-GCST90016993		0.026	0.0409	0.524901	104247	3011	finn-b-O15_MEMBR_PREMAT_RUPT
1091	rs61806970	C	T	0.142548	0.0320688	9.09e-06	14306	0.00137924	19.7559	genus Erysipelatoclostridium id.11381	ebi-a-GCST90016993		-0.089	0.0532	0.0947109	104247	3011	finn-b-O15_MEMBR_PREMAT_RUPT
1092	rs622418	A	G	-0.0668051	0.0143224	3.68e-06	14306	0.00151848	21.7534	genus Erysipelatoclostridium id.11381	ebi-a-GCST90016993		0.0283	0.0267	0.2893	104247	3011	finn-b-O15_MEMBR_PREMAT_RUPT
1093	rs6474512	C	A	-0.067015	0.0143201	3.02e-06	14306	0.00152851	21.8973	genus Erysipelatoclostridium id.11381	ebi-a-GCST90016993		0.0138	0.0276	0.616	104247	3011	finn-b-O15_MEMBR_PREMAT_RUPT
1094	rs710230	C	T	-0.143381	0.0281514	6.33e-07	14306	0.00181	25.9372	genus Erysipelatoclostridium id.11381	ebi-a-GCST90016993		0.0818	0.0516	0.1134	104247	3011	finn-b-O15_MEMBR_PREMAT_RUPT
1095	rs7221249	G	A	-0.0839861	0.0142741	4.31e-09	14306	0.00241407	34.6144	genus Erysipelatoclostridium id.11381	ebi-a-GCST90016993		-0.0234	0.0267	0.3805	104247	3011	finn-b-O15_MEMBR_PREMAT_RUPT
1096	rs9590927	A	G	0.0646003	0.0143479	6.39e-06	14306	0.00141501	20.269	genus Erysipelatoclostridium id.11381	ebi-a-GCST90016993		0.0201	0.0268	0.453	104247	3011	finn-b-O15_MEMBR_PREMAT_RUPT
1097	rs75949021	TRUE	C	-0.169667	0.0374238	3.58e-06	14306	0.00143469	20.5513	genus Erysipelotrichaceae UCG003 id.11384	ebi-a-GCST90016994		-0.0016	0.0684	0.9812	104247	3011	finn-b-O15_MEMBR_PREMAT_RUPT
1098	rs112767262	T	C	0.0732963	0.0163589	8.21e-06	14306	0.00140129	20.0722	genus Escherichia Shigella id.3504	ebi-a-GCST90016995		0.0024	0.0323	0.9402	104247	3011	finn-b-O15_MEMBR_PREMAT_RUPT
1099	rs113127095	A	G	0.151009	0.0323434	3.33e-06	14306	0.00152144	21.7958	genus Escherichia Shigella id.3504	ebi-a-GCST90016995		-0.0536	0.0677	0.4288	104247	3011	finn-b-O15_MEMBR_PREMAT_RUPT
1100	rs113513883	A	G	0.172283	0.038041	5.28e-06	14306	0.00143166	20.5079	genus Escherichia Shigella id.3504	ebi-a-GCST90016995		0.0384	0.0761	0.6138	104247	3011	finn-b-O15_MEMBR_PREMAT_RUPT
1101	rs1154904	G	A	0.0613376	0.0130644	3.04e-06	14306	0.00153846	22.0401	genus Escherichia Shigella id.3504	ebi-a-GCST90016995		0.0112	0.0267	0.675601	104247	3011	finn-b-O15_MEMBR_PREMAT_RUPT
1102	rs11706043	T	A	0.075657	0.0164155	5.87e-06	14306	0.00148261	21.2388	genus Escherichia Shigella id.3504	ebi-a-GCST90016995		0.0394	0.0324	0.2236	104247	3011	finn-b-O15_MEMBR_PREMAT_RUPT
1103	rs117092367	A	T	0.117362	0.0264533	9.65e-06	14306	0.00137398	19.6804	genus Escherichia Shigella id.3504	ebi-a-GCST90016995		0.0837	0.0546	0.125	104247	3011	finn-b-O15_MEMBR_PREMAT_RUPT
1104	rs118526	A	C	0.0594401	0.013598	8e-06	14306	0.00133386	19.1051	genus Escherichia Shigella id.3504	ebi-a-GCST90016995		0.0079	0.0292	0.7862	104247	3011	finn-b-O15_MEMBR_PREMAT_RUPT
1105	rs2267739	G	C	0.115505	0.0237628	1.42e-06	14306	0.00164881	23.6236	genus Escherichia Shigella id.3504	ebi-a-GCST90016995		0.0688	0.0425	0.106	104247	3011	finn-b-O15_MEMBR_PREMAT_RUPT
1106	rs2798105	A	G	-0.100851	0.0222045	8.24e-06	14306	0.00143991	20.6261	genus Escherichia Shigella id.3504	ebi-a-GCST90016995		0.0969	0.0445	0.0293603	104247	3011	finn-b-O15_MEMBR_PREMAT_RUPT
1107	rs35555519	C	G	0.101976	0.0222883	4.92e-06	14306	0.00146113	20.9306	genus Escherichia Shigella id.3504	ebi-a-GCST90016995		-0.0396	0.0449	0.3778	104247	3011	finn-b-O15_MEMBR_PREMAT_RUPT
1108	rs4731451	G	A	-0.0609885	0.0135157	7.47e-06	14306	0.00142129	20.3591	genus Escherichia Shigella id.3504	ebi-a-GCST90016995		-0.038	0.0287	0.1848	104247	3011	finn-b-O15_MEMBR_PREMAT_RUPT
1109	rs57024273	T	C	0.0626172	0.0139919	9.7e-06	14306	0.001398	20.025	genus Escherichia Shigella id.3504	ebi-a-GCST90016995		0.0176	0.0307	0.5665	104247	3011	finn-b-O15_MEMBR_PREMAT_RUPT
1110	rs592299	T	C	-0.0592004	0.0129486	4.77e-06	14306	0.00145899	20.8998	genus Escherichia Shigella id.3504	ebi-a-GCST90016995		-0.0457	0.0269	0.0895695	104247	3011	finn-b-O15_MEMBR_PREMAT_RUPT
1111	rs73208162	A	G	-0.119296	0.024839	2.19e-06	14306	0.00160978	23.0634	genus Escherichia Shigella id.3504	ebi-a-GCST90016995		-0.0093	0.0766	0.9031	104247	3011	finn-b-O15_MEMBR_PREMAT_RUPT
1112	rs7502686	G	C	-0.136384	0.0302576	5.9e-06	14306	0.00141815	20.3141	genus Escherichia Shigella id.3504	ebi-a-GCST90016995		0.109	0.0558	0.0509601	104247	3011	finn-b-O15_MEMBR_PREMAT_RUPT
1113	rs112617308	T	C	-0.170873	0.0362844	2.38e-06	14306	0.0015478	22.1741	genus Eubacterium brachy group id.11296	ebi-a-GCST90016996		-0.0617	0.0466	0.1851	104247	3011	finn-b-O15_MEMBR_PREMAT_RUPT
1114	rs12151423	G	A	-0.101329	0.0227324	9.27e-06	14306	0.00138693	19.8663	genus Eubacterium brachy group id.11296	ebi-a-GCST90016996		0.0435	0.0267	0.1026	104247	3011	finn-b-O15_MEMBR_PREMAT_RUPT
1115	rs13139592	T	C	-0.145997	0.0327192	7.97e-06	14306	0.00138983	19.9077	genus Eubacterium brachy group id.11296	ebi-a-GCST90016996		0.044	0.0396	0.2666	104247	3011	finn-b-O15_MEMBR_PREMAT_RUPT
1116	rs1384962	G	A	-0.120888	0.0266264	6.99e-06	14306	0.00143879	20.6101	genus Eubacterium brachy group id.11296	ebi-a-GCST90016996		0.0037	0.0287	0.8982	104247	3011	finn-b-O15_MEMBR_PREMAT_RUPT
1117	rs2913110	T	C	-0.105143	0.022942	4.56e-06	14306	0.00146603	21.0009	genus Eubacterium brachy group id.11296	ebi-a-GCST90016996		-0.0036	0.028	0.8985	104247	3011	finn-b-O15_MEMBR_PREMAT_RUPT
1118	rs4862235	A	G	-0.104806	0.0225751	3.73e-06	14306	0.00150432	21.5502	genus Eubacterium brachy group id.11296	ebi-a-GCST90016996		-0.0543	0.027	0.0439602	104247	3011	finn-b-O15_MEMBR_PREMAT_RUPT
1119	rs62348779	T	C	-0.201481	0.043286	3.78e-06	14306	0.00151216	21.6627	genus Eubacterium brachy group id.11296	ebi-a-GCST90016996		-0.0401	0.0504	0.4262	104247	3011	finn-b-O15_MEMBR_PREMAT_RUPT
1120	rs6591893	A	G	-0.108225	0.0240319	7.34e-06	14306	0.00141562	20.2777	genus Eubacterium brachy group id.11296	ebi-a-GCST90016996		-0.032	0.0281	0.2556	104247	3011	finn-b-O15_MEMBR_PREMAT_RUPT
1121	rs720439	G	A	0.111927	0.0251252	7.03e-06	14306	0.00138526	19.8422	genus Eubacterium brachy group id.11296	ebi-a-GCST90016996		0.0437	0.0313	0.1629	104247	3011	finn-b-O15_MEMBR_PREMAT_RUPT
1122	rs73199919	T	C	-0.236717	0.0531335	8.16e-06	14306	0.00138549	19.8455	genus Eubacterium brachy group id.11296	ebi-a-GCST90016996		0.0617	0.0622	0.3216	104247	3011	finn-b-O15_MEMBR_PREMAT_RUPT
1123	rs9613196	T	A	-0.238718	0.0528561	4.99e-06	14306	0.00142378	20.3948	genus Eubacterium brachy group id.11296	ebi-a-GCST90016996		-0.0147	0.067	0.8267	104247	3011	finn-b-O15_MEMBR_PREMAT_RUPT
1124	rs1020520	T	G	-0.0590705	0.0132929	8.89e-06	14306	0.00137843	19.7443	genus Eubacterium coprostanoligenes group id.11375	ebi-a-GCST90016997		-0.0067	0.0372	0.856	104247	3011	finn-b-O15_MEMBR_PREMAT_RUPT
1125	rs10444197	A	G	-0.0505823	0.0113455	5.98e-06	14306	0.00138749	19.8742	genus Eubacterium coprostanoligenes group id.11375	ebi-a-GCST90016997		0.0023	0.0281	0.9339	104247	3011	finn-b-O15_MEMBR_PREMAT_RUPT
1126	rs11052069	C	T	-0.0477832	0.0107833	9.38e-06	14306	0.00137067	19.633	genus Eubacterium coprostanoligenes group id.11375	ebi-a-GCST90016997		-0.0371	0.027	0.1702	104247	3011	finn-b-O15_MEMBR_PREMAT_RUPT
1127	rs11720857	C	T	0.0630776	0.0144485	9.26e-06	14306	0.00133048	19.0565	genus Eubacterium coprostanoligenes group id.11375	ebi-a-GCST90016997		-0.0632	0.0353	0.0734903	104247	3011	finn-b-O15_MEMBR_PREMAT_RUPT
1128	rs12906958	C	T	-0.0533159	0.0115935	4.35e-06	14306	0.00147613	21.1458	genus Eubacterium coprostanoligenes group id.11375	ebi-a-GCST90016997		0.0355	0.0293	0.2248	104247	3011	finn-b-O15_MEMBR_PREMAT_RUPT
1129	rs17159861	C	T	0.0962228	0.0168388	1.04e-08	14306	0.00227733	32.6492	genus Eubacterium coprostanoligenes group id.11375	ebi-a-GCST90016997		-0.0807	0.0433	0.0626297	104247	3011	finn-b-O15_MEMBR_PREMAT_RUPT
1130	rs2644213	A	G	-0.0538845	0.0121245	9.86e-06	14306	0.00137874	19.7487	genus Eubacterium coprostanoligenes group id.11375	ebi-a-GCST90016997		-0.0492	0.0292	0.0917191	104247	3011	finn-b-O15_MEMBR_PREMAT_RUPT
1131	rs4076415	G	T	-0.0515152	0.0110294	1.99e-06	14306	0.0015226	21.8125	genus Eubacterium coprostanoligenes group id.11375	ebi-a-GCST90016997		-0.0341	0.0278	0.2205	104247	3011	finn-b-O15_MEMBR_PREMAT_RUPT
1132	rs62024432	C	T	-0.0769698	0.0172101	7.5e-06	14306	0.0013962	19.9992	genus Eubacterium coprostanoligenes group id.11375	ebi-a-GCST90016997		0.0418	0.0453	0.3563	104247	3011	finn-b-O15_MEMBR_PREMAT_RUPT
1133	rs6762473	A	C	-0.0521584	0.0112353	4.26e-06	14306	0.00150421	21.5486	genus Eubacterium coprostanoligenes group id.11375	ebi-a-GCST90016997		-0.0073	0.0281	0.7949	104247	3011	finn-b-O15_MEMBR_PREMAT_RUPT
1134	rs76898927	G	A	0.123055	0.0266375	4.79e-06	14306	0.00148952	21.3379	genus Eubacterium coprostanoligenes group id.11375	ebi-a-GCST90016997		0.0896	0.0592	0.1302	104247	3011	finn-b-O15_MEMBR_PREMAT_RUPT
1135	rs79895140	T	C	-0.0641017	0.0141153	8.62e-06	14306	0.00143951	20.6205	genus Eubacterium coprostanoligenes group id.11375	ebi-a-GCST90016997		0.0059	0.0427	0.8906	104247	3011	finn-b-O15_MEMBR_PREMAT_RUPT
1136	rs9648214	T	C	-0.0828719	0.016431	2.52e-07	14306	0.00177499	25.4347	genus Eubacterium coprostanoligenes group id.11375	ebi-a-GCST90016997		-0.0024	0.0476	0.9596	104247	3011	finn-b-O15_MEMBR_PREMAT_RUPT
1137	rs158115	G	C	0.0915271	0.0190611	9.74e-06	14306	0.00160911	23.0538	genus Eubacterium eligens group id.14372	ebi-a-GCST90016998		-0.0315	0.0399	0.4292	104247	3011	finn-b-O15_MEMBR_PREMAT_RUPT
1138	rs182318	G	A	-0.0824941	0.0195615	8.4e-06	14306	0.00124161	17.782	genus Eubacterium eligens group id.14372	ebi-a-GCST90016998		0.017	0.0487	0.7271	104247	3011	finn-b-O15_MEMBR_PREMAT_RUPT
1139	rs2200429	A	G	-0.0888825	0.0198479	5.3e-06	14306	0.00139984	20.0513	genus Eubacterium eligens group id.14372	ebi-a-GCST90016998		-0.0489	0.0451	0.2791	104247	3011	finn-b-O15_MEMBR_PREMAT_RUPT
1140	rs265534	T	G	-0.0563756	0.0120127	2.27e-06	14306	0.00153714	22.0212	genus Eubacterium eligens group id.14372	ebi-a-GCST90016998		0.0255	0.0269	0.3442	104247	3011	finn-b-O15_MEMBR_PREMAT_RUPT
1141	rs4583233	A	C	0.0670205	0.0128122	2.84e-07	14306	0.00190906	27.3594	genus Eubacterium eligens group id.14372	ebi-a-GCST90016998		-0.0287	0.0297	0.3342	104247	3011	finn-b-O15_MEMBR_PREMAT_RUPT
1142	rs56080211	T	C	-0.123093	0.0282743	9.14e-06	14306	0.00132309	18.9506	genus Eubacterium eligens group id.14372	ebi-a-GCST90016998		0.068	0.0508	0.1813	104247	3011	finn-b-O15_MEMBR_PREMAT_RUPT
1143	rs6923695	T	G	0.103268	0.0229525	4.87e-06	14306	0.00141299	20.24	genus Eubacterium eligens group id.14372	ebi-a-GCST90016998		0.0603	0.0533	0.2584	104247	3011	finn-b-O15_MEMBR_PREMAT_RUPT
1144	rs72839198	C	G	0.155659	0.0375612	3.14e-06	14306	0.00119903	17.1715	genus Eubacterium eligens group id.14372	ebi-a-GCST90016998		0.0846	0.0466	0.0692293	104247	3011	finn-b-O15_MEMBR_PREMAT_RUPT
1145	rs74606150	C	G	-0.196454	0.042565	4.25e-06	14306	0.0014868	21.2988	genus Eubacterium eligens group id.14372	ebi-a-GCST90016998		-0.0775	0.0681	0.2552	104247	3011	finn-b-O15_MEMBR_PREMAT_RUPT
1146	rs10147907	T	G	0.172263	0.039601	8.27e-06	14306	0.00132093	18.9196	genus Eubacterium fissicatena group id.14373	ebi-a-GCST90016999		-0.0547	0.0504	0.2778	104247	3011	finn-b-O15_MEMBR_PREMAT_RUPT
1147	rs11818408	G	A	0.10585	0.0237114	8.2e-06	14306	0.00139106	19.9254	genus Eubacterium fissicatena group id.14373	ebi-a-GCST90016999		0.047	0.0274	0.0856801	104247	3011	finn-b-O15_MEMBR_PREMAT_RUPT
1148	rs11876297	T	C	0.131469	0.0281712	2.67e-06	14306	0.00152005	21.7759	genus Eubacterium fissicatena group id.14373	ebi-a-GCST90016999		0.0118	0.0302	0.696299	104247	3011	finn-b-O15_MEMBR_PREMAT_RUPT
1149	rs151257695	A	G	0.20951	0.0454847	3.1e-06	14306	0.00148087	21.2138	genus Eubacterium fissicatena group id.14373	ebi-a-GCST90016999		-0.0785	0.0519	0.1304	104247	3011	finn-b-O15_MEMBR_PREMAT_RUPT
1150	rs1768152	C	T	-0.139489	0.0316186	8.7e-06	14306	0.00135858	19.4596	genus Eubacterium fissicatena group id.14373	ebi-a-GCST90016999		0.033	0.0441	0.4546	104247	3011	finn-b-O15_MEMBR_PREMAT_RUPT
1151	rs2733072	G	A	0.109644	0.0228306	1.49e-06	14306	0.0016096	23.0608	genus Eubacterium fissicatena group id.14373	ebi-a-GCST90016999		-0.0188	0.0268	0.483	104247	3011	finn-b-O15_MEMBR_PREMAT_RUPT
1152	rs3771393	T	C	-0.130842	0.0266671	7.38e-07	14306	0.00167994	24.0703	genus Eubacterium fissicatena group id.14373	ebi-a-GCST90016999		0.0478	0.0337	0.1559	104247	3011	finn-b-O15_MEMBR_PREMAT_RUPT
1153	rs6934739	A	G	0.111463	0.0252788	9.75e-06	14306	0.00135719	19.4396	genus Eubacterium fissicatena group id.14373	ebi-a-GCST90016999		0.0047	0.0284	0.8684	104247	3011	finn-b-O15_MEMBR_PREMAT_RUPT
1154	rs7104872	G	A	0.138612	0.0291906	2.73e-06	14306	0.00157367	22.5452	genus Eubacterium fissicatena group id.14373	ebi-a-GCST90016999		-0.0614	0.043	0.1532	104247	3011	finn-b-O15_MEMBR_PREMAT_RUPT
1155	rs10501370	C	T	-0.115589	0.0252489	5.42e-06	14306	0.00146283	20.955	genus Eubacterium hallii group id.11338	ebi-a-GCST90017000		-0.0232	0.0555	0.6762	104247	3011	finn-b-O15_MEMBR_PREMAT_RUPT
1156	rs10798999	C	T	0.0601661	0.0126752	2.61e-06	14306	0.00157251	22.5286	genus Eubacterium hallii group id.11338	ebi-a-GCST90017000		0.0506	0.0302	0.0931408	104247	3011	finn-b-O15_MEMBR_PREMAT_RUPT
1157	rs10808115	C	A	0.0504747	0.0109922	4.42e-06	14306	0.0014717	21.0823	genus Eubacterium hallii group id.11338	ebi-a-GCST90017000		0.0115	0.0266	0.6669	104247	3011	finn-b-O15_MEMBR_PREMAT_RUPT
1158	rs117748144	T	C	-0.126582	0.028712	7.86e-06	14306	0.00135678	19.4337	genus Eubacterium hallii group id.11338	ebi-a-GCST90017000		0.0124	0.0602	0.8364	104247	3011	finn-b-O15_MEMBR_PREMAT_RUPT
1159	rs13116360	T	C	0.154124	0.0297185	2.94e-07	14306	0.00187652	26.8922	genus Eubacterium hallii group id.11338	ebi-a-GCST90017000		0.0222	0.0542	0.681601	104247	3011	finn-b-O15_MEMBR_PREMAT_RUPT
1160	rs138531890	A	G	0.153138	0.0349456	5.43e-06	14306	0.00134054	19.2008	genus Eubacterium hallii group id.11338	ebi-a-GCST90017000		0.035	0.0499	0.4833	104247	3011	finn-b-O15_MEMBR_PREMAT_RUPT
1161	rs17074066	T	C	-0.0813986	0.0189272	9.35e-06	14306	0.00129116	18.4927	genus Eubacterium hallii group id.11338	ebi-a-GCST90017000		0.0229	0.0961	0.8115	104247	3011	finn-b-O15_MEMBR_PREMAT_RUPT
1162	rs17474256	G	A	0.0810805	0.0184573	9.45e-06	14306	0.00134708	19.2946	genus Eubacterium hallii group id.11338	ebi-a-GCST90017000		-0.0658	0.0451	0.1443	104247	3011	finn-b-O15_MEMBR_PREMAT_RUPT
1163	rs281379	A	G	-0.0499523	0.0112153	9.33e-06	14306	0.00138474	19.8348	genus Eubacterium hallii group id.11338	ebi-a-GCST90017000		-0.0132	0.0272	0.628599	104247	3011	finn-b-O15_MEMBR_PREMAT_RUPT
1164	rs28584818	A	G	0.126115	0.0268627	4.43e-06	14306	0.00153832	22.0381	genus Eubacterium hallii group id.11338	ebi-a-GCST90017000		0.0218	0.0497	0.660601	104247	3011	finn-b-O15_MEMBR_PREMAT_RUPT
1165	rs60254196	G	A	0.0522832	0.0111865	2.7e-06	14306	0.0015246	21.8411	genus Eubacterium hallii group id.11338	ebi-a-GCST90017000		0.0454	0.0269	0.0912095	104247	3011	finn-b-O15_MEMBR_PREMAT_RUPT
1166	rs630939	C	T	-0.0508914	0.0114352	9.16e-06	14306	0.00138255	19.8034	genus Eubacterium hallii group id.11338	ebi-a-GCST90017000		0.0117	0.027	0.664	104247	3011	finn-b-O15_MEMBR_PREMAT_RUPT
1167	rs6550770	C	T	0.198087	0.0443545	4.82e-06	14306	0.00139224	19.9423	genus Eubacterium hallii group id.11338	ebi-a-GCST90017000		-0.087	0.0667	0.1923	104247	3011	finn-b-O15_MEMBR_PREMAT_RUPT
1168	rs74018587	C	T	0.208943	0.043822	3.7e-06	14306	0.00158658	22.7306	genus Eubacterium hallii group id.11338	ebi-a-GCST90017000		-0.0202	0.0678	0.766099	104247	3011	finn-b-O15_MEMBR_PREMAT_RUPT
1169	rs78056098	G	T	-0.0507411	0.0113758	8.29e-06	14306	0.00138878	19.8928	genus Eubacterium hallii group id.11338	ebi-a-GCST90017000		-0.0409	0.0278	0.1419	104247	3011	finn-b-O15_MEMBR_PREMAT_RUPT
1170	rs949971	T	G	-0.0540164	0.0116101	3.29e-06	14306	0.00151079	21.6431	genus Eubacterium hallii group id.11338	ebi-a-GCST90017000		0.0116	0.0284	0.6844	104247	3011	finn-b-O15_MEMBR_PREMAT_RUPT
1171	rs10263623	C	T	0.193496	0.0439023	8.91e-06	14306	0.00135601	19.4227	genus Eubacterium nodatum group id.11297	ebi-a-GCST90017001		0.0504	0.0702	0.4726	104247	3011	finn-b-O15_MEMBR_PREMAT_RUPT
1172	rs10458299	T	C	-0.187753	0.041969	8.37e-06	14306	0.00139698	20.0104	genus Eubacterium nodatum group id.11297	ebi-a-GCST90017001		0.0793	0.0506	0.1173	104247	3011	finn-b-O15_MEMBR_PREMAT_RUPT
1173	rs11006576	A	G	-0.110167	0.024593	7.99e-06	14306	0.00140073	20.0641	genus Eubacterium nodatum group id.11297	ebi-a-GCST90017001		-0.0514	0.0269	0.0562199	104247	3011	finn-b-O15_MEMBR_PREMAT_RUPT
1174	rs113893692	C	T	-0.185107	0.0403573	5.76e-06	14306	0.0014684	21.0349	genus Eubacterium nodatum group id.11297	ebi-a-GCST90017001		0.0327	0.0409	0.4231	104247	3011	finn-b-O15_MEMBR_PREMAT_RUPT
1175	rs34297067	A	G	-0.186907	0.0341475	6.6e-08	14306	0.00208981	29.9552	genus Eubacterium nodatum group id.11297	ebi-a-GCST90017001		0.0203	0.0378	0.590999	104247	3011	finn-b-O15_MEMBR_PREMAT_RUPT
1176	rs61841040	G	T	0.160621	0.0341609	3.56e-06	14306	0.00154297	22.1047	genus Eubacterium nodatum group id.11297	ebi-a-GCST90017001		0.0287	0.0339	0.3969	104247	3011	finn-b-O15_MEMBR_PREMAT_RUPT
1177	rs6818880	G	A	0.110081	0.0245964	7.83e-06	14306	0.00139816	20.0272	genus Eubacterium nodatum group id.11297	ebi-a-GCST90017001		0.0046	0.0269	0.8634	104247	3011	finn-b-O15_MEMBR_PREMAT_RUPT
1178	rs77910827	C	T	0.201788	0.0413568	9.05e-07	14306	0.00166133	23.8032	genus Eubacterium nodatum group id.11297	ebi-a-GCST90017001		0.0278	0.0429	0.5178	104247	3011	finn-b-O15_MEMBR_PREMAT_RUPT
1179	rs7827125	C	T	0.1223	0.0271331	7.17e-06	14306	0.00141814	20.3139	genus Eubacterium nodatum group id.11297	ebi-a-GCST90017001		0.0069	0.0298	0.8165	104247	3011	finn-b-O15_MEMBR_PREMAT_RUPT
1180	rs7880204	T	C	-0.125454	0.0275303	6.84e-06	14306	0.00144944	20.7628	genus Eubacterium nodatum group id.11297	ebi-a-GCST90017001		-0.0157	0.0309	0.610401	104247	3011	finn-b-O15_MEMBR_PREMAT_RUPT
1181	rs9425984	T	C	-0.130234	0.0292347	7.21e-06	14306	0.00138526	19.8422	genus Eubacterium nodatum group id.11297	ebi-a-GCST90017001		0.0156	0.0324	0.6307	104247	3011	finn-b-O15_MEMBR_PREMAT_RUPT
1182	rs12129908	A	C	-0.0893273	0.0198333	5.8e-06	14306	0.00141594	20.2823	genus Eubacterium oxidoreducens group id.11339	ebi-a-GCST90017002		0.0043	0.0272	0.8753	104247	3011	finn-b-O15_MEMBR_PREMAT_RUPT
1183	rs12423772	G	T	0.14098	0.0295029	2.63e-06	14306	0.00159358	22.831	genus Eubacterium oxidoreducens group id.11339	ebi-a-GCST90017002		0.0656	0.0383	0.0871004	104247	3011	finn-b-O15_MEMBR_PREMAT_RUPT
1184	rs1425962	C	G	-0.0906104	0.0200612	7.32e-06	14306	0.00142398	20.3977	genus Eubacterium oxidoreducens group id.11339	ebi-a-GCST90017002		0.0088	0.0275	0.749701	104247	3011	finn-b-O15_MEMBR_PREMAT_RUPT
1185	rs2973294	G	T	0.0923559	0.0195439	2.39e-06	14306	0.00155852	22.3278	genus Eubacterium oxidoreducens group id.11339	ebi-a-GCST90017002		-0.0259	0.0269	0.336	104247	3011	finn-b-O15_MEMBR_PREMAT_RUPT
1186	rs34561138	G	A	0.216145	0.045992	2.51e-06	14306	0.00154148	22.0834	genus Eubacterium oxidoreducens group id.11339	ebi-a-GCST90017002		0.0005	0.0704	0.9942	104247	3011	finn-b-O15_MEMBR_PREMAT_RUPT
1187	rs440215	T	C	-0.0932766	0.0195294	1.65e-06	14306	0.00159205	22.809	genus Eubacterium oxidoreducens group id.11339	ebi-a-GCST90017002		-0.0021	0.0268	0.9381	104247	3011	finn-b-O15_MEMBR_PREMAT_RUPT
1188	rs10248854	C	A	-0.0527827	0.0113464	4.21e-06	14306	0.0015104	21.6375	genus Eubacterium rectale group id.14374	ebi-a-GCST90017003		-0.0001	0.0273	0.9979	104247	3011	finn-b-O15_MEMBR_PREMAT_RUPT
1189	rs10797540	A	G	0.0503179	0.0108389	3.53e-06	14306	0.00150419	21.5483	genus Eubacterium rectale group id.14374	ebi-a-GCST90017003		0.0135	0.0269	0.616401	104247	3011	finn-b-O15_MEMBR_PREMAT_RUPT
1190	rs10892089	C	G	-0.0635522	0.0140072	6.22e-06	14306	0.00143687	20.5825	genus Eubacterium rectale group id.14374	ebi-a-GCST90017003		0.0181	0.0343	0.597301	104247	3011	finn-b-O15_MEMBR_PREMAT_RUPT
1191	rs117151453	G	C	-0.113141	0.0243541	1.84e-06	14306	0.00150634	21.5792	genus Eubacterium rectale group id.14374	ebi-a-GCST90017003		-0.0948	0.043	0.0275302	104247	3011	finn-b-O15_MEMBR_PREMAT_RUPT
1192	rs143694765	T	C	0.0870025	0.019779	9.75e-06	14306	0.00135067	19.3461	genus Eubacterium rectale group id.14374	ebi-a-GCST90017003		-0.0374	0.0444	0.3997	104247	3011	finn-b-O15_MEMBR_PREMAT_RUPT
1193	rs16960159	C	G	-0.156596	0.0336234	4.1e-06	14306	0.00151392	21.6879	genus Eubacterium rectale group id.14374	ebi-a-GCST90017003		-0.0362	0.0454	0.4248	104247	3011	finn-b-O15_MEMBR_PREMAT_RUPT
1194	rs2884897	A	G	-0.129364	0.0289021	6.44e-06	14306	0.00139843	20.0312	genus Eubacterium rectale group id.14374	ebi-a-GCST90017003		-0.0117	0.0724	0.8715	104247	3011	finn-b-O15_MEMBR_PREMAT_RUPT
1195	rs314726	T	C	0.0528824	0.0109486	1.38e-06	14306	0.00162809	23.3262	genus Eubacterium rectale group id.14374	ebi-a-GCST90017003		-0.0493	0.0269	0.0663101	104247	3011	finn-b-O15_MEMBR_PREMAT_RUPT
1196	rs35398954	A	G	-0.0901402	0.0174602	5.4e-07	14306	0.00185957	26.6488	genus Eubacterium rectale group id.14374	ebi-a-GCST90017003		0.0222	0.0367	0.5452	104247	3011	finn-b-O15_MEMBR_PREMAT_RUPT
1197	rs3980709	A	T	-0.0622701	0.0140572	6.86e-06	14306	0.00136977	19.6201	genus Eubacterium rectale group id.14374	ebi-a-GCST90017003		0.0279	0.0352	0.4276	104247	3011	finn-b-O15_MEMBR_PREMAT_RUPT
1198	rs59427698	A	G	-0.0576035	0.0130853	5.37e-06	14306	0.00135277	19.3762	genus Eubacterium rectale group id.14374	ebi-a-GCST90017003		0.0443	0.0343	0.1971	104247	3011	finn-b-O15_MEMBR_PREMAT_RUPT
1199	rs62547233	A	G	0.0536319	0.0120201	9.9e-06	14306	0.00138966	19.9053	genus Eubacterium rectale group id.14374	ebi-a-GCST90017003		0.0305	0.0295	0.3016	104247	3011	finn-b-O15_MEMBR_PREMAT_RUPT
1200	rs10131724	C	A	0.199832	0.0414577	2.39e-06	14306	0.00162142	23.2305	genus Eubacterium ruminantium group id.11340	ebi-a-GCST90017004		0.0619	0.0453	0.1718	104247	3011	finn-b-O15_MEMBR_PREMAT_RUPT
1201	rs10923018	G	A	0.0726438	0.0160924	6.8e-06	14306	0.00142239	20.3749	genus Eubacterium ruminantium group id.11340	ebi-a-GCST90017004		0.011	0.027	0.684301	104247	3011	finn-b-O15_MEMBR_PREMAT_RUPT
1202	rs112375806	T	A	0.143141	0.0293757	5.82e-06	14306	0.00165697	23.7406	genus Eubacterium ruminantium group id.11340	ebi-a-GCST90017004		0.0153	0.0389	0.6951	104247	3011	finn-b-O15_MEMBR_PREMAT_RUPT
1203	rs11637981	T	G	0.073258	0.0160888	5.44e-06	14306	0.00144716	20.7301	genus Eubacterium ruminantium group id.11340	ebi-a-GCST90017004		0.0139	0.0269	0.605701	104247	3011	finn-b-O15_MEMBR_PREMAT_RUPT
1204	rs13025464	C	T	0.0737077	0.0163786	6.97e-06	14306	0.00141364	20.2494	genus Eubacterium ruminantium group id.11340	ebi-a-GCST90017004		-0.0139	0.0273	0.6108	104247	3011	finn-b-O15_MEMBR_PREMAT_RUPT
1205	rs139749	C	T	-0.0845439	0.0171791	8.59e-07	14306	0.00169009	24.216	genus Eubacterium ruminantium group id.11340	ebi-a-GCST90017004		-0.0235	0.0284	0.4088	104247	3011	finn-b-O15_MEMBR_PREMAT_RUPT
1206	rs16891896	G	A	-0.174787	0.0390573	2.38e-06	14306	0.00139794	20.0241	genus Eubacterium ruminantium group id.11340	ebi-a-GCST90017004		-0.0523	0.0477	0.273	104247	3011	finn-b-O15_MEMBR_PREMAT_RUPT
1207	rs17519472	C	T	0.107804	0.0233984	4.7e-06	14306	0.00148161	21.2245	genus Eubacterium ruminantium group id.11340	ebi-a-GCST90017004		-0.0139	0.0385	0.7186	104247	3011	finn-b-O15_MEMBR_PREMAT_RUPT
1208	rs209813	G	A	-0.103488	0.0236391	9.23e-06	14306	0.00133788	19.1627	genus Eubacterium ruminantium group id.11340	ebi-a-GCST90017004		0.0433	0.0379	0.2539	104247	3011	finn-b-O15_MEMBR_PREMAT_RUPT
1209	rs2116427	A	G	0.0911461	0.0182353	4.67e-07	14306	0.00174331	24.9798	genus Eubacterium ruminantium group id.11340	ebi-a-GCST90017004		-0.0104	0.0305	0.734	104247	3011	finn-b-O15_MEMBR_PREMAT_RUPT
1210	rs2229917	A	G	0.153538	0.0323922	2.16e-06	14306	0.00156802	22.4642	genus Eubacterium ruminantium group id.11340	ebi-a-GCST90017004		0.0633	0.0666	0.3415	104247	3011	finn-b-O15_MEMBR_PREMAT_RUPT
1211	rs2418654	C	T	-0.0748879	0.0165852	6.17e-06	14306	0.00142313	20.3855	genus Eubacterium ruminantium group id.11340	ebi-a-GCST90017004		-0.0258	0.0273	0.346	104247	3011	finn-b-O15_MEMBR_PREMAT_RUPT
1212	rs2817174	C	T	-0.0734306	0.0163687	7.87e-06	14306	0.00140474	20.1217	genus Eubacterium ruminantium group id.11340	ebi-a-GCST90017004		0.0163	0.0273	0.5506	104247	3011	finn-b-O15_MEMBR_PREMAT_RUPT
1213	rs57340348	T	C	-0.0979429	0.0212166	4.93e-06	14306	0.00148741	21.3076	genus Eubacterium ruminantium group id.11340	ebi-a-GCST90017004		0.0525	0.0335	0.1173	104247	3011	finn-b-O15_MEMBR_PREMAT_RUPT
1214	rs606117	G	A	-0.0833243	0.018056	4.82e-06	14306	0.0014864	21.2931	genus Eubacterium ruminantium group id.11340	ebi-a-GCST90017004		-0.0094	0.0301	0.755899	104247	3011	finn-b-O15_MEMBR_PREMAT_RUPT
1215	rs6676699	T	G	0.0888124	0.0196447	6.38e-06	14306	0.00142665	20.436	genus Eubacterium ruminantium group id.11340	ebi-a-GCST90017004		-0.0304	0.0291	0.2965	104247	3011	finn-b-O15_MEMBR_PREMAT_RUPT
1216	rs7000472	G	A	0.0762282	0.016523	4.07e-06	14306	0.00148556	21.281	genus Eubacterium ruminantium group id.11340	ebi-a-GCST90017004		0.0065	0.0272	0.8107	104247	3011	finn-b-O15_MEMBR_PREMAT_RUPT
1217	rs72836424	C	T	-0.139825	0.030069	2.62e-06	14306	0.00150924	21.6208	genus Eubacterium ruminantium group id.11340	ebi-a-GCST90017004		-0.0316	0.0428	0.4603	104247	3011	finn-b-O15_MEMBR_PREMAT_RUPT
1218	rs73139629	A	C	-0.115098	0.0247909	5.36e-06	14306	0.00150445	21.5521	genus Eubacterium ruminantium group id.11340	ebi-a-GCST90017004		-0.0169	0.0464	0.715899	104247	3011	finn-b-O15_MEMBR_PREMAT_RUPT
1219	rs11617697	A	G	-0.143349	0.0286241	7.22e-07	14306	0.00175004	25.0764	genus Eubacterium ventriosum group id.11341	ebi-a-GCST90017005		-0.0631	0.0586	0.2817	104247	3011	finn-b-O15_MEMBR_PREMAT_RUPT
1220	rs12964517	G	A	0.0587198	0.0123453	2.08e-06	14306	0.00157892	22.6207	genus Eubacterium ventriosum group id.11341	ebi-a-GCST90017005		-0.0195	0.0296	0.5108	104247	3011	finn-b-O15_MEMBR_PREMAT_RUPT
1221	rs13082419	C	T	-0.0715522	0.016137	9.56e-06	14306	0.00137242	19.658	genus Eubacterium ventriosum group id.11341	ebi-a-GCST90017005		0.005	0.0428	0.9062	104247	3011	finn-b-O15_MEMBR_PREMAT_RUPT
1222	rs16884680	G	T	-0.0906428	0.0191909	1.74e-06	14306	0.00155697	22.3057	genus Eubacterium ventriosum group id.11341	ebi-a-GCST90017005		0.0835	0.0438	0.0568094	104247	3011	finn-b-O15_MEMBR_PREMAT_RUPT
1223	rs35179274	C	T	-0.0627263	0.013786	5.76e-06	14306	0.00144503	20.6996	genus Eubacterium ventriosum group id.11341	ebi-a-GCST90017005		0.0753	0.0349	0.0310499	104247	3011	finn-b-O15_MEMBR_PREMAT_RUPT
1224	rs3809430	T	C	-0.0548171	0.0118426	3.55e-06	14306	0.00149544	21.4229	genus Eubacterium ventriosum group id.11341	ebi-a-GCST90017005		0.0263	0.0289	0.3629	104247	3011	finn-b-O15_MEMBR_PREMAT_RUPT
1225	rs57199565	T	C	0.0783394	0.0160257	7.97e-07	14306	0.00166757	23.8927	genus Eubacterium ventriosum group id.11341	ebi-a-GCST90017005		0.0072	0.0351	0.8368	104247	3011	finn-b-O15_MEMBR_PREMAT_RUPT
1226	rs6048195	A	T	-0.0603594	0.011658	2.5e-07	14306	0.0018703	26.8029	genus Eubacterium ventriosum group id.11341	ebi-a-GCST90017005		0.034	0.028	0.2251	104247	3011	finn-b-O15_MEMBR_PREMAT_RUPT
1227	rs66746423	C	T	0.0751501	0.0164978	6.11e-06	14306	0.0014483	20.7466	genus Eubacterium ventriosum group id.11341	ebi-a-GCST90017005		-0.0367	0.0372	0.3231	104247	3011	finn-b-O15_MEMBR_PREMAT_RUPT
1228	rs66830358	T	A	0.0528752	0.0117972	6.87e-06	14306	0.00140223	20.0856	genus Eubacterium ventriosum group id.11341	ebi-a-GCST90017005		-0.0246	0.0272	0.3646	104247	3011	finn-b-O15_MEMBR_PREMAT_RUPT
1229	rs6704822	G	A	-0.0739179	0.0166705	6.62e-06	14306	0.00137242	19.6581	genus Eubacterium ventriosum group id.11341	ebi-a-GCST90017005		0.0072	0.0394	0.856	104247	3011	finn-b-O15_MEMBR_PREMAT_RUPT
1230	rs72783037	C	A	0.0658926	0.0143747	6.55e-06	14306	0.00146663	21.0095	genus Eubacterium ventriosum group id.11341	ebi-a-GCST90017005		0.0095	0.033	0.773499	104247	3011	finn-b-O15_MEMBR_PREMAT_RUPT
1231	rs73615400	T	C	-0.0956303	0.0193428	9.54e-07	14306	0.00170566	24.4395	genus Eubacterium ventriosum group id.11341	ebi-a-GCST90017005		0.0413	0.0452	0.3606	104247	3011	finn-b-O15_MEMBR_PREMAT_RUPT
1232	rs73849225	T	C	0.0975711	0.0224388	5.21e-06	14306	0.00131993	18.9053	genus Eubacterium ventriosum group id.11341	ebi-a-GCST90017005		-0.0064	0.0487	0.8958	104247	3011	finn-b-O15_MEMBR_PREMAT_RUPT
1233	rs78250280	G	A	0.0749762	0.0164404	3.36e-06	14306	0.00145169	20.7951	genus Eubacterium ventriosum group id.11341	ebi-a-GCST90017005		-0.0351	0.0383	0.3602	104247	3011	finn-b-O15_MEMBR_PREMAT_RUPT
1234	rs876734	T	C	0.0618696	0.0132532	2.89e-06	14306	0.00152102	21.7898	genus Eubacterium ventriosum group id.11341	ebi-a-GCST90017005		0.0354	0.0298	0.2356	104247	3011	finn-b-O15_MEMBR_PREMAT_RUPT
1235	rs9316536	T	G	-0.0817111	0.0183121	7.84e-06	14306	0.00138984	19.9079	genus Eubacterium ventriosum group id.11341	ebi-a-GCST90017005		0.0272	0.0385	0.4788	104247	3011	finn-b-O15_MEMBR_PREMAT_RUPT
1236	rs10140184	A	C	0.0576795	0.012599	4.96e-06	14306	0.00146291	20.9561	genus Eubacterium xylanophilum group id.14375	ebi-a-GCST90017006		-0.0011	0.0273	0.9691	104247	3011	finn-b-O15_MEMBR_PREMAT_RUPT
1237	rs10917203	A	C	0.0612633	0.0130917	3.15e-06	14306	0.00152836	21.8952	genus Eubacterium xylanophilum group id.14375	ebi-a-GCST90017006		0.0041	0.0274	0.8806	104247	3011	finn-b-O15_MEMBR_PREMAT_RUPT
1238	rs112176119	C	T	-0.113455	0.0245762	3.33e-06	14306	0.00148749	21.3087	genus Eubacterium xylanophilum group id.14375	ebi-a-GCST90017006		0.0048	0.046	0.9173	104247	3011	finn-b-O15_MEMBR_PREMAT_RUPT
1239	rs12980122	C	G	-0.108274	0.0238257	5.02e-06	14306	0.00144149	20.6489	genus Eubacterium xylanophilum group id.14375	ebi-a-GCST90017006		-0.0831	0.0513	0.1054	104247	3011	finn-b-O15_MEMBR_PREMAT_RUPT
1240	rs13239072	G	A	0.0687427	0.0142728	1.82e-06	14306	0.00161887	23.1939	genus Eubacterium xylanophilum group id.14375	ebi-a-GCST90017006		0.0083	0.0299	0.780301	104247	3011	finn-b-O15_MEMBR_PREMAT_RUPT
1241	rs17830032	G	A	-0.160597	0.0310515	2.39e-07	14306	0.0018663	26.7454	genus Eubacterium xylanophilum group id.14375	ebi-a-GCST90017006		0.0149	0.0496	0.764401	104247	3011	finn-b-O15_MEMBR_PREMAT_RUPT
1242	rs1999224	G	T	-0.0949051	0.0203503	3.75e-06	14306	0.00151796	21.7459	genus Eubacterium xylanophilum group id.14375	ebi-a-GCST90017006		0.0416	0.0448	0.3539	104247	3011	finn-b-O15_MEMBR_PREMAT_RUPT
1243	rs2012708	G	A	-0.0573202	0.0126905	6.53e-06	14306	0.00142403	20.3985	genus Eubacterium xylanophilum group id.14375	ebi-a-GCST90017006		0.0097	0.0281	0.7293	104247	3011	finn-b-O15_MEMBR_PREMAT_RUPT
1244	rs2213117	T	G	0.0877797	0.0189012	4.21e-06	14306	0.00150535	21.565	genus Eubacterium xylanophilum group id.14375	ebi-a-GCST90017006		0.0199	0.0364	0.585301	104247	3011	finn-b-O15_MEMBR_PREMAT_RUPT
1245	rs4654122	G	C	-0.0553508	0.0123588	7.2e-06	14306	0.00140013	20.0555	genus Eubacterium xylanophilum group id.14375	ebi-a-GCST90017006		-0.0257	0.0267	0.337	104247	3011	finn-b-O15_MEMBR_PREMAT_RUPT
1246	rs75586835	A	G	-0.114498	0.0263455	9.39e-06	14306	0.00131854	18.8852	genus Eubacterium xylanophilum group id.14375	ebi-a-GCST90017006		0.0007	0.0521	0.9897	104247	3011	finn-b-O15_MEMBR_PREMAT_RUPT
1247	rs79582700	C	G	-0.0951677	0.0199969	2.41e-06	14306	0.0015807	22.6461	genus Eubacterium xylanophilum group id.14375	ebi-a-GCST90017006		0.0121	0.0409	0.767901	104247	3011	finn-b-O15_MEMBR_PREMAT_RUPT
1248	rs10927394	G	T	-0.232262	0.0512364	7.02e-06	14306	0.00143436	20.5465	genus Faecalibacterium id.2057	ebi-a-GCST90017007		-0.141	0.0961	0.1425	104247	3011	finn-b-O15_MEMBR_PREMAT_RUPT
1249	rs114946999	C	T	-0.0861565	0.01896	5.7e-06	14306	0.0014413	20.6461	genus Faecalibacterium id.2057	ebi-a-GCST90017007		-0.0182	0.0405	0.653699	104247	3011	finn-b-O15_MEMBR_PREMAT_RUPT
1250	rs11776390	T	C	-0.078354	0.017183	6.4e-06	14306	0.00145136	20.7904	genus Faecalibacterium id.2057	ebi-a-GCST90017007		0.0273	0.0538	0.6123	104247	3011	finn-b-O15_MEMBR_PREMAT_RUPT
1251	rs12320842	C	G	0.094833	0.0163962	7.57e-09	14306	0.00233292	33.4481	genus Faecalibacterium id.2057	ebi-a-GCST90017007		0.0238	0.0394	0.5456	104247	3011	finn-b-O15_MEMBR_PREMAT_RUPT
1252	rs1271565	C	T	-0.0576251	0.0119649	1.3e-06	14306	0.00161876	23.1923	genus Faecalibacterium id.2057	ebi-a-GCST90017007		-0.0334	0.0304	0.2717	104247	3011	finn-b-O15_MEMBR_PREMAT_RUPT
1253	rs12753492	A	C	0.0641305	0.0149933	8.8e-06	14306	0.00127721	18.2925	genus Faecalibacterium id.2057	ebi-a-GCST90017007		0.1015	0.0427	0.0174	104247	3011	finn-b-O15_MEMBR_PREMAT_RUPT
1254	rs2835874	T	C	-0.0866356	0.0196496	7.54e-06	14306	0.00135699	19.4368	genus Faecalibacterium id.2057	ebi-a-GCST90017007		0.1548	0.073	0.0338899	104247	3011	finn-b-O15_MEMBR_PREMAT_RUPT
1255	rs28376661	C	G	0.0504817	0.0109368	3.66e-06	14306	0.00148704	21.3023	genus Faecalibacterium id.2057	ebi-a-GCST90017007		0.0138	0.0291	0.6354	104247	3011	finn-b-O15_MEMBR_PREMAT_RUPT
1256	rs61875484	C	G	0.0817953	0.018369	9.18e-06	14306	0.00138409	19.8255	genus Faecalibacterium id.2057	ebi-a-GCST90017007		0.0638	0.0458	0.1635	104247	3011	finn-b-O15_MEMBR_PREMAT_RUPT
1257	rs6910935	G	A	-0.134864	0.0277032	1.38e-06	14306	0.00165385	23.6958	genus Faecalibacterium id.2057	ebi-a-GCST90017007		-0.0043	0.0558	0.9391	104247	3011	finn-b-O15_MEMBR_PREMAT_RUPT
1258	rs75499067	C	T	0.227585	0.0465522	1.76e-06	14306	0.00166788	23.8972	genus Faecalibacterium id.2057	ebi-a-GCST90017007		0.0204	0.0514	0.6917	104247	3011	finn-b-O15_MEMBR_PREMAT_RUPT
1259	rs79656633	T	C	0.145631	0.0323019	8.14e-06	14306	0.00141879	20.3231	genus Faecalibacterium id.2057	ebi-a-GCST90017007		-0.0061	0.0448	0.8912	104247	3011	finn-b-O15_MEMBR_PREMAT_RUPT
1260	rs9536330	T	C	-0.048317	0.010797	5.33e-06	14306	0.00139787	20.0232	genus Faecalibacterium id.2057	ebi-a-GCST90017007		-0.0073	0.0268	0.785599	104247	3011	finn-b-O15_MEMBR_PREMAT_RUPT
1261	rs11126423	T	C	-0.0904399	0.0196301	5.91e-06	14306	0.00148154	21.2234	genus Family XIII AD3011 group id.11293	ebi-a-GCST90017008		0.0352	0.047	0.4533	104247	3011	finn-b-O15_MEMBR_PREMAT_RUPT
1262	rs11736617	G	A	-0.0759493	0.0172101	9.02e-06	14306	0.00135948	19.4724	genus Family XIII AD3011 group id.11293	ebi-a-GCST90017008		-0.058	0.0588	0.3237	104247	3011	finn-b-O15_MEMBR_PREMAT_RUPT
1263	rs12812672	T	C	-0.096065	0.020828	2.56e-06	14306	0.00148481	21.2703	genus Family XIII AD3011 group id.11293	ebi-a-GCST90017008		-0.0692	0.0517	0.1805	104247	3011	finn-b-O15_MEMBR_PREMAT_RUPT
1264	rs12911842	A	T	-0.0811976	0.0183335	6.91e-06	14306	0.00136925	19.6126	genus Family XIII AD3011 group id.11293	ebi-a-GCST90017008		0.0251	0.0485	0.604399	104247	3011	finn-b-O15_MEMBR_PREMAT_RUPT
1265	rs149302	T	C	-0.0645635	0.0143225	7.48e-06	14306	0.00141841	20.3178	genus Family XIII AD3011 group id.11293	ebi-a-GCST90017008		-0.0463	0.0317	0.144	104247	3011	finn-b-O15_MEMBR_PREMAT_RUPT
1266	rs16840310	G	A	0.0608052	0.0122149	6.75e-07	14306	0.00172915	24.7766	genus Family XIII AD3011 group id.11293	ebi-a-GCST90017008		0.0199	0.0271	0.4619	104247	3011	finn-b-O15_MEMBR_PREMAT_RUPT
1267	rs16940167	C	T	0.0732552	0.0159898	3.91e-06	14306	0.00146499	20.986	genus Family XIII AD3011 group id.11293	ebi-a-GCST90017008		0.0065	0.034	0.8477	104247	3011	finn-b-O15_MEMBR_PREMAT_RUPT
1268	rs17156849	G	A	-0.112891	0.0245292	4.19e-06	14306	0.0014784	21.1783	genus Family XIII AD3011 group id.11293	ebi-a-GCST90017008		-0.0514	0.0571	0.3684	104247	3011	finn-b-O15_MEMBR_PREMAT_RUPT
1269	rs62029761	A	G	0.128753	0.0276002	3.89e-06	14306	0.00151884	21.7585	genus Family XIII AD3011 group id.11293	ebi-a-GCST90017008		0.0814	0.0594	0.1706	104247	3011	finn-b-O15_MEMBR_PREMAT_RUPT
1270	rs62200412	C	T	-0.0800851	0.0163834	5.8e-07	14306	0.00166745	23.891	genus Family XIII AD3011 group id.11293	ebi-a-GCST90017008		-0.0469	0.0307	0.1264	104247	3011	finn-b-O15_MEMBR_PREMAT_RUPT
1271	rs72730932	C	A	-0.0899559	0.0177107	6.89e-07	14306	0.00180006	25.7945	genus Family XIII AD3011 group id.11293	ebi-a-GCST90017008		0.0396	0.0465	0.3936	104247	3011	finn-b-O15_MEMBR_PREMAT_RUPT
1272	rs739451	C	T	0.0649589	0.0147534	7.88e-06	14306	0.00135328	19.3835	genus Family XIII AD3011 group id.11293	ebi-a-GCST90017008		-0.0423	0.033	0.1994	104247	3011	finn-b-O15_MEMBR_PREMAT_RUPT
1273	rs9276029	A	G	-0.0811384	0.0185669	8.93e-06	14306	0.00133314	19.0947	genus Family XIII AD3011 group id.11293	ebi-a-GCST90017008		-0.0747	0.0364	0.0401098	104247	3011	finn-b-O15_MEMBR_PREMAT_RUPT
1274	rs9837139	A	G	0.10752	0.0240482	8.71e-06	14306	0.00139537	19.9872	genus Family XIII AD3011 group id.11293	ebi-a-GCST90017008		-0.0872	0.0482	0.0704693	104247	3011	finn-b-O15_MEMBR_PREMAT_RUPT
1275	rs9852893	G	C	-0.0657834	0.0129056	3.88e-07	14306	0.00181288	25.9786	genus Family XIII AD3011 group id.11293	ebi-a-GCST90017008		-0.009	0.0301	0.7652	104247	3011	finn-b-O15_MEMBR_PREMAT_RUPT
1276	rs112362903	A	G	-0.149047	0.0333271	7.88e-06	14306	0.00139613	19.9982	genus Family XIII UCG001 id.11294	ebi-a-GCST90017009		0.0479	0.0733	0.5132	104247	3011	finn-b-O15_MEMBR_PREMAT_RUPT
1277	rs116979587	T	A	-0.121679	0.0260821	3.05e-06	14306	0.00151903	21.7613	genus Family XIII UCG001 id.11294	ebi-a-GCST90017009		-0.0596	0.0622	0.3378	104247	3011	finn-b-O15_MEMBR_PREMAT_RUPT
1278	rs12049454	T	C	-0.0647298	0.0134065	1.17e-06	14306	0.00162687	23.3086	genus Family XIII UCG001 id.11294	ebi-a-GCST90017009		0.0466	0.0274	0.0897098	104247	3011	finn-b-O15_MEMBR_PREMAT_RUPT
1279	rs1426266	C	T	0.0665521	0.0137151	1.25e-06	14306	0.00164321	23.5432	genus Family XIII UCG001 id.11294	ebi-a-GCST90017009		0.0099	0.03	0.7417	104247	3011	finn-b-O15_MEMBR_PREMAT_RUPT
1280	rs2276529	C	G	-0.0759406	0.0165099	5.36e-06	14306	0.00147672	21.1543	genus Family XIII UCG001 id.11294	ebi-a-GCST90017009		0.0207	0.0334	0.5348	104247	3011	finn-b-O15_MEMBR_PREMAT_RUPT
1281	rs3842897	G	A	-0.112639	0.0242751	5.2e-06	14306	0.00150274	21.5276	genus Family XIII UCG001 id.11294	ebi-a-GCST90017009		-0.0653	0.0472	0.1661	104247	3011	finn-b-O15_MEMBR_PREMAT_RUPT
1282	rs62414802	C	T	-0.0611904	0.013457	4.29e-06	14306	0.00144319	20.6733	genus Family XIII UCG001 id.11294	ebi-a-GCST90017009		0.003	0.0307	0.9225	104247	3011	finn-b-O15_MEMBR_PREMAT_RUPT
1283	rs7119679	G	A	-0.0809085	0.0174782	3.52e-06	14306	0.00149564	21.4257	genus Family XIII UCG001 id.11294	ebi-a-GCST90017009		0.0304	0.0313	0.3305	104247	3011	finn-b-O15_MEMBR_PREMAT_RUPT
1284	rs76463770	A	G	0.19313	0.0419866	3.77e-06	14306	0.00147679	21.1552	genus Family XIII UCG001 id.11294	ebi-a-GCST90017009		-0.1353	0.0784	0.0842597	104247	3011	finn-b-O15_MEMBR_PREMAT_RUPT
1285	rs8076666	G	A	-0.088655	0.0198094	8.02e-06	14306	0.0013981	20.0264	genus Family XIII UCG001 id.11294	ebi-a-GCST90017009		-0.0763	0.041	0.0626498	104247	3011	finn-b-O15_MEMBR_PREMAT_RUPT
1286	rs114873521	C	T	-0.130067	0.0294087	7.13e-06	14306	0.00136543	19.5579	genus Flavonifractor id.2059	ebi-a-GCST90017010		0.062	0.0521	0.2341	104247	3011	finn-b-O15_MEMBR_PREMAT_RUPT
1287	rs11642826	G	C	0.14686	0.0325191	6.65e-06	14306	0.00142362	20.3924	genus Flavonifractor id.2059	ebi-a-GCST90017010		-0.0046	0.0462	0.9215	104247	3011	finn-b-O15_MEMBR_PREMAT_RUPT
1288	rs11811696	T	C	-0.116063	0.0241012	2.07e-06	14306	0.00161841	23.1873	genus Flavonifractor id.2059	ebi-a-GCST90017010		-0.0233	0.0487	0.6321	104247	3011	finn-b-O15_MEMBR_PREMAT_RUPT
1289	rs12030302	G	A	0.0692276	0.0137467	5.61e-07	14306	0.0017696	25.3572	genus Flavonifractor id.2059	ebi-a-GCST90017010		-0.0322	0.0267	0.2288	104247	3011	finn-b-O15_MEMBR_PREMAT_RUPT
1290	rs12038887	C	G	0.0942719	0.0211646	9.37e-06	14306	0.00138492	19.8374	genus Flavonifractor id.2059	ebi-a-GCST90017010		0.0393	0.0394	0.3187	104247	3011	finn-b-O15_MEMBR_PREMAT_RUPT
1291	rs34066017	A	G	0.0764294	0.0159789	1.52e-06	14306	0.00159667	22.8753	genus Flavonifractor id.2059	ebi-a-GCST90017010		-0.0068	0.0331	0.837	104247	3011	finn-b-O15_MEMBR_PREMAT_RUPT
1292	rs6761463	C	G	0.0833919	0.0184596	8.11e-06	14306	0.00142451	20.4053	genus Flavonifractor id.2059	ebi-a-GCST90017010		0.0394	0.0391	0.3133	104247	3011	finn-b-O15_MEMBR_PREMAT_RUPT
1293	rs806808	C	T	-0.0667272	0.0136557	1.18e-06	14306	0.00166623	23.8736	genus Flavonifractor id.2059	ebi-a-GCST90017010		-0.0052	0.0271	0.8468	104247	3011	finn-b-O15_MEMBR_PREMAT_RUPT
1294	rs10439674	A	G	-0.0572129	0.0130007	7.68e-06	14306	0.00135191	19.3639	genus Fusicatenibacter id.11305	ebi-a-GCST90017011		0.0291	0.033	0.3791	104247	3011	finn-b-O15_MEMBR_PREMAT_RUPT
1295	rs167879	T	C	0.0659543	0.0148763	5.87e-06	14306	0.00137209	19.6533	genus Fusicatenibacter id.11305	ebi-a-GCST90017011		-0.0629	0.0374	0.0929801	104247	3011	finn-b-O15_MEMBR_PREMAT_RUPT
1296	rs1864685	A	C	-0.0494799	0.0108105	4.96e-06	14306	0.00146222	20.9462	genus Fusicatenibacter id.11305	ebi-a-GCST90017011		0.0097	0.0272	0.7204	104247	3011	finn-b-O15_MEMBR_PREMAT_RUPT
1297	rs2025938	G	A	-0.0967298	0.0205426	2.99e-06	14306	0.00154746	22.1691	genus Fusicatenibacter id.11305	ebi-a-GCST90017011		0.0617	0.0538	0.2516	104247	3011	finn-b-O15_MEMBR_PREMAT_RUPT
1298	rs2039204	A	T	0.0497415	0.0107941	3.94e-06	14306	0.00148219	21.2326	genus Fusicatenibacter id.11305	ebi-a-GCST90017011		0.0214	0.0278	0.4406	104247	3011	finn-b-O15_MEMBR_PREMAT_RUPT
1299	rs206581	A	G	-0.0568339	0.0127894	8.96e-06	14306	0.00137847	19.7449	genus Fusicatenibacter id.11305	ebi-a-GCST90017011		-0.0173	0.0326	0.5944	104247	3011	finn-b-O15_MEMBR_PREMAT_RUPT
1300	rs2132128	G	A	-0.0771914	0.0160344	1.08e-06	14306	0.00161738	23.1724	genus Fusicatenibacter id.11305	ebi-a-GCST90017011		0.018	0.0446	0.686901	104247	3011	finn-b-O15_MEMBR_PREMAT_RUPT
1301	rs3303	T	C	-0.0953657	0.020407	3.94e-06	14306	0.00152421	21.8356	genus Fusicatenibacter id.11305	ebi-a-GCST90017011		0.0252	0.0548	0.6458	104247	3011	finn-b-O15_MEMBR_PREMAT_RUPT
1302	rs4378146	A	C	-0.0616691	0.0125259	7.2e-07	14306	0.00169147	24.2358	genus Fusicatenibacter id.11305	ebi-a-GCST90017011		0.0337	0.0307	0.2712	104247	3011	finn-b-O15_MEMBR_PREMAT_RUPT
1303	rs60254196	G	A	0.0492427	0.0109365	5.47e-06	14306	0.00141512	20.2706	genus Fusicatenibacter id.11305	ebi-a-GCST90017011		0.0454	0.0269	0.0912095	104247	3011	finn-b-O15_MEMBR_PREMAT_RUPT
1304	rs62187631	T	C	-0.0710571	0.015924	4.55e-06	14306	0.00138992	19.909	genus Fusicatenibacter id.11305	ebi-a-GCST90017011		0.0513	0.034	0.131	104247	3011	finn-b-O15_MEMBR_PREMAT_RUPT
1305	rs62353480	A	G	-0.0701397	0.0145589	1.57e-06	14306	0.00161975	23.2065	genus Fusicatenibacter id.11305	ebi-a-GCST90017011		0.0005	0.0358	0.9898	104247	3011	finn-b-O15_MEMBR_PREMAT_RUPT
1306	rs6515626	G	A	0.141575	0.0313559	7.29e-06	14306	0.00142298	20.3833	genus Fusicatenibacter id.11305	ebi-a-GCST90017011		-0.0037	0.0532	0.9451	104247	3011	finn-b-O15_MEMBR_PREMAT_RUPT
1307	rs704418	C	T	-0.0739124	0.0151073	7.77e-07	14306	0.00167038	23.9332	genus Fusicatenibacter id.11305	ebi-a-GCST90017011		0.0033	0.0406	0.9346	104247	3011	finn-b-O15_MEMBR_PREMAT_RUPT
1308	rs73103914	A	G	-0.0597324	0.0134458	8.3e-06	14306	0.00137762	19.7327	genus Fusicatenibacter id.11305	ebi-a-GCST90017011		-0.0244	0.0374	0.5132	104247	3011	finn-b-O15_MEMBR_PREMAT_RUPT
1309	rs792108	C	T	0.0508345	0.0113843	8.5e-06	14306	0.00139181	19.9363	genus Fusicatenibacter id.11305	ebi-a-GCST90017011		-0.034	0.0273	0.2117	104247	3011	finn-b-O15_MEMBR_PREMAT_RUPT
1310	rs8028026	G	A	0.0792146	0.0180505	8.06e-06	14306	0.0013444	19.2562	genus Fusicatenibacter id.11305	ebi-a-GCST90017011		-0.0116	0.0464	0.803	104247	3011	finn-b-O15_MEMBR_PREMAT_RUPT
1311	rs8063430	T	C	-0.104026	0.022217	4.93e-06	14306	0.00153013	21.9206	genus Fusicatenibacter id.11305	ebi-a-GCST90017011		-0.0187	0.0613	0.759799	104247	3011	finn-b-O15_MEMBR_PREMAT_RUPT
1312	rs9905659	G	A	-0.061617	0.0136576	7.31e-06	14306	0.00142075	20.3513	genus Fusicatenibacter id.11305	ebi-a-GCST90017011		-0.0125	0.0344	0.7154	104247	3011	finn-b-O15_MEMBR_PREMAT_RUPT
1313	rs117347059	G	C	-0.128261	0.0285123	9.17e-06	14306	0.00141251	20.2332	genus Gordonibacter id.821	ebi-a-GCST90017012		-0.001	0.0344	0.9777	104247	3011	finn-b-O15_MEMBR_PREMAT_RUPT
1314	rs13412653	A	C	0.107597	0.0239228	8.61e-06	14306	0.00141203	20.2263	genus Gordonibacter id.821	ebi-a-GCST90017012		0.0212	0.0276	0.4427	104247	3011	finn-b-O15_MEMBR_PREMAT_RUPT
1315	rs16955299	G	A	-0.196423	0.0433538	6.37e-06	14306	0.00143281	20.5244	genus Gordonibacter id.821	ebi-a-GCST90017012		-0.0379	0.045	0.4005	104247	3011	finn-b-O15_MEMBR_PREMAT_RUPT
1316	rs322296	G	A	0.17869	0.037722	4.02e-06	14306	0.00156607	22.4363	genus Gordonibacter id.821	ebi-a-GCST90017012		0.011	0.0512	0.8303	104247	3011	finn-b-O15_MEMBR_PREMAT_RUPT
1317	rs35042269	C	A	-0.180293	0.0403296	8.11e-06	14306	0.00139504	19.9825	genus Gordonibacter id.821	ebi-a-GCST90017012		-0.0392	0.0422	0.3524	104247	3011	finn-b-O15_MEMBR_PREMAT_RUPT
1318	rs3765837	T	G	-0.190729	0.0433608	7.17e-06	14306	0.00135062	19.3454	genus Gordonibacter id.821	ebi-a-GCST90017012		0.0346	0.0516	0.502599	104247	3011	finn-b-O15_MEMBR_PREMAT_RUPT
1319	rs4596722	G	A	-0.102908	0.0231571	9.06e-06	14306	0.00137852	19.7455	genus Gordonibacter id.821	ebi-a-GCST90017012		-0.0357	0.0267	0.1816	104247	3011	finn-b-O15_MEMBR_PREMAT_RUPT
1320	rs61934597	C	T	-0.172495	0.0388567	8.37e-06	14306	0.00137564	19.7043	genus Gordonibacter id.821	ebi-a-GCST90017012		-0.0741	0.055	0.1778	104247	3011	finn-b-O15_MEMBR_PREMAT_RUPT
1321	rs71545975	A	G	-0.153972	0.0338918	7.04e-06	14306	0.00144062	20.6364	genus Gordonibacter id.821	ebi-a-GCST90017012		0.0013	0.0354	0.9709	104247	3011	finn-b-O15_MEMBR_PREMAT_RUPT
1322	rs7220558	A	T	0.116884	0.0234834	6.71e-07	14306	0.0017287	24.7701	genus Gordonibacter id.821	ebi-a-GCST90017012		0.0019	0.0271	0.9439	104247	3011	finn-b-O15_MEMBR_PREMAT_RUPT
1323	rs72714787	C	A	0.181405	0.0377102	1.43e-06	14306	0.00161496	23.1377	genus Gordonibacter id.821	ebi-a-GCST90017012		-0.0456	0.0396	0.2495	104247	3011	finn-b-O15_MEMBR_PREMAT_RUPT
1324	rs72939513	A	G	-0.21399	0.0490592	7.98e-06	14306	0.00132816	19.0233	genus Gordonibacter id.821	ebi-a-GCST90017012		0.0321	0.0608	0.597301	104247	3011	finn-b-O15_MEMBR_PREMAT_RUPT
1325	rs7294633	T	C	-0.12867	0.0249946	3.44e-07	14306	0.00184901	26.4973	genus Gordonibacter id.821	ebi-a-GCST90017012		-0.0389	0.0302	0.1979	104247	3011	finn-b-O15_MEMBR_PREMAT_RUPT
1326	rs76287110	A	T	-0.242965	0.0466177	1.67e-07	14306	0.00189515	27.1597	genus Gordonibacter id.821	ebi-a-GCST90017012		0.035	0.0488	0.4736	104247	3011	finn-b-O15_MEMBR_PREMAT_RUPT
1327	rs768830	A	G	-0.149852	0.0333315	7.76e-06	14306	0.00141086	20.2095	genus Gordonibacter id.821	ebi-a-GCST90017012		0.011	0.0369	0.7655	104247	3011	finn-b-O15_MEMBR_PREMAT_RUPT
1328	rs10781340	A	G	-0.0948915	0.0203221	4.32e-06	14306	0.00152173	21.8	genus Haemophilus id.3698	ebi-a-GCST90017013		0.0539	0.0407	0.1854	104247	3011	finn-b-O15_MEMBR_PREMAT_RUPT
1329	rs10840326	C	G	-0.0677384	0.0151463	7.37e-06	14306	0.00139615	19.9984	genus Haemophilus id.3698	ebi-a-GCST90017013		0.0062	0.0278	0.8243	104247	3011	finn-b-O15_MEMBR_PREMAT_RUPT
1330	rs111582866	G	A	-0.124265	0.026016	1.27e-06	14306	0.00159223	22.8116	genus Haemophilus id.3698	ebi-a-GCST90017013		-0.0761	0.0478	0.1114	104247	3011	finn-b-O15_MEMBR_PREMAT_RUPT
1331	rs12191680	C	G	0.106544	0.0200323	1.47e-07	14306	0.00197342	28.2837	genus Haemophilus id.3698	ebi-a-GCST90017013		-0.0003	0.0444	0.9952	104247	3011	finn-b-O15_MEMBR_PREMAT_RUPT
1332	rs12876183	T	A	0.0749201	0.016711	9.62e-06	14306	0.00140302	20.097	genus Haemophilus id.3698	ebi-a-GCST90017013		0.0449	0.0281	0.1106	104247	3011	finn-b-O15_MEMBR_PREMAT_RUPT
1333	rs35509	G	A	0.128249	0.0268779	2.01e-06	14306	0.00158894	22.7644	genus Haemophilus id.3698	ebi-a-GCST90017013		-0.0303	0.0672	0.6521	104247	3011	finn-b-O15_MEMBR_PREMAT_RUPT
1334	rs4822728	T	C	0.0705861	0.0151388	3.48e-06	14306	0.00151732	21.7368	genus Haemophilus id.3698	ebi-a-GCST90017013		0.0168	0.0267	0.5283	104247	3011	finn-b-O15_MEMBR_PREMAT_RUPT
1335	rs56310940	G	C	-0.108393	0.0247052	7.23e-06	14306	0.00134377	19.2471	genus Haemophilus id.3698	ebi-a-GCST90017013		-0.0603	0.041	0.1412	104247	3011	finn-b-O15_MEMBR_PREMAT_RUPT
1336	rs76022354	C	T	0.244638	0.0505504	1.83e-06	14306	0.00163444	23.4174	genus Haemophilus id.3698	ebi-a-GCST90017013		-0.0417	0.062	0.5011	104247	3011	finn-b-O15_MEMBR_PREMAT_RUPT
1337	rs78909003	T	C	-0.246256	0.0503924	1.67e-06	14306	0.00166648	23.8772	genus Haemophilus id.3698	ebi-a-GCST90017013		0.0042	0.059	0.9437	104247	3011	finn-b-O15_MEMBR_PREMAT_RUPT
1338	rs9328464	T	C	0.0723095	0.0148799	1.42e-06	14306	0.001648	23.6118	genus Haemophilus id.3698	ebi-a-GCST90017013		-0.0318	0.0267	0.234	104247	3011	finn-b-O15_MEMBR_PREMAT_RUPT
1339	rs9382510	C	T	-0.093521	0.0172649	7.12e-08	14306	0.00204683	29.3379	genus Haemophilus id.3698	ebi-a-GCST90017013		0.0482	0.0302	0.1105	104247	3011	finn-b-O15_MEMBR_PREMAT_RUPT
1340	rs9574096	A	T	-0.0736375	0.0155227	2.18e-06	14306	0.00157059	22.5011	genus Haemophilus id.3698	ebi-a-GCST90017013		-0.0198	0.0276	0.4731	104247	3011	finn-b-O15_MEMBR_PREMAT_RUPT
1341	rs9895850	T	C	-0.192957	0.0416755	2.14e-06	14306	0.0014962	21.4338	genus Haemophilus id.3698	ebi-a-GCST90017013		-0.0505	0.0655	0.4405	104247	3011	finn-b-O15_MEMBR_PREMAT_RUPT
1342	rs12415649	G	C	0.0839384	0.0190567	7.88e-06	14306	0.00135431	19.3984	genus Holdemanella id.11393	ebi-a-GCST90017014		0.0044	0.0323	0.891	104247	3011	finn-b-O15_MEMBR_PREMAT_RUPT
1343	rs12513188	G	A	0.0903906	0.0195276	4.65e-06	14306	0.00149548	21.4234	genus Holdemanella id.11393	ebi-a-GCST90017014		-0.0001	0.0302	0.9981	104247	3011	finn-b-O15_MEMBR_PREMAT_RUPT
1344	rs17586763	T	C	-0.227285	0.0510135	7.72e-06	14306	0.00138564	19.8477	genus Holdemanella id.11393	ebi-a-GCST90017014		0.0266	0.0607	0.6607	104247	3011	finn-b-O15_MEMBR_PREMAT_RUPT
1345	rs1830029	G	C	0.0954096	0.021093	5.35e-06	14306	0.00142813	20.4572	genus Holdemanella id.11393	ebi-a-GCST90017014		0.0029	0.0321	0.9286	104247	3011	finn-b-O15_MEMBR_PREMAT_RUPT
1346	rs1926302	G	A	-0.107972	0.0231421	7.5e-06	14306	0.00151928	21.7649	genus Holdemanella id.11393	ebi-a-GCST90017014		-0.0093	0.032	0.7718	104247	3011	finn-b-O15_MEMBR_PREMAT_RUPT
1347	rs34187114	C	A	-0.104505	0.022601	5.13e-06	14306	0.00149229	21.3776	genus Holdemanella id.11393	ebi-a-GCST90017014		-0.011	0.0426	0.7972	104247	3011	finn-b-O15_MEMBR_PREMAT_RUPT
1348	rs35228298	G	A	0.0934832	0.0202886	7.3e-06	14306	0.00148184	21.2277	genus Holdemanella id.11393	ebi-a-GCST90017014		-0.0368	0.0365	0.3133	104247	3011	finn-b-O15_MEMBR_PREMAT_RUPT
1349	rs4541991	T	C	-0.0927334	0.0194435	2.1e-06	14306	0.00158751	22.7438	genus Holdemanella id.11393	ebi-a-GCST90017014		0.0394	0.0286	0.1679	104247	3011	finn-b-O15_MEMBR_PREMAT_RUPT
1350	rs607782	C	T	0.0854214	0.0172515	7.19e-07	14306	0.00171087	24.5143	genus Holdemanella id.11393	ebi-a-GCST90017014		0.0009	0.0278	0.9755	104247	3011	finn-b-O15_MEMBR_PREMAT_RUPT
1351	rs62113381	T	C	-0.105447	0.0232029	5.54e-06	14306	0.00144158	20.6501	genus Holdemanella id.11393	ebi-a-GCST90017014		-0.0086	0.0396	0.8279	104247	3011	finn-b-O15_MEMBR_PREMAT_RUPT
1352	rs73011279	T	C	-0.0961669	0.0199336	1.36e-06	14306	0.00162426	23.2712	genus Holdemanella id.11393	ebi-a-GCST90017014		0.0272	0.0319	0.393	104247	3011	finn-b-O15_MEMBR_PREMAT_RUPT
1353	rs75764681	T	C	-0.283103	0.0598999	1.94e-06	14306	0.00155898	22.3345	genus Holdemanella id.11393	ebi-a-GCST90017014		-0.0278	0.0657	0.671699	104247	3011	finn-b-O15_MEMBR_PREMAT_RUPT
1354	rs761624	G	C	-0.0959801	0.0179537	1.38e-07	14306	0.00199374	28.5755	genus Holdemanella id.11393	ebi-a-GCST90017014		0.043	0.0291	0.1393	104247	3011	finn-b-O15_MEMBR_PREMAT_RUPT
1355	rs8113760	G	A	0.078999	0.01734	4.62e-06	14306	0.00144876	20.7532	genus Holdemanella id.11393	ebi-a-GCST90017014		-0.0156	0.029	0.5892	104247	3011	finn-b-O15_MEMBR_PREMAT_RUPT
1356	rs10885477	T	C	-0.135137	0.0301894	8.6e-06	14306	0.00139866	20.0345	genus Holdemania id.2157	ebi-a-GCST90017015		-0.0082	0.061	0.8936	104247	3011	finn-b-O15_MEMBR_PREMAT_RUPT
1357	rs11080063	G	A	-0.0665238	0.0149837	6.67e-06	14306	0.00137594	19.7086	genus Holdemania id.2157	ebi-a-GCST90017015		-0.0085	0.0272	0.756	104247	3011	finn-b-O15_MEMBR_PREMAT_RUPT
1358	rs111745969	A	G	0.120677	0.0265781	3.71e-06	14306	0.00143899	20.613	genus Holdemania id.2157	ebi-a-GCST90017015		0.0099	0.0392	0.801	104247	3011	finn-b-O15_MEMBR_PREMAT_RUPT
1359	rs113593397	A	G	-0.128935	0.0282526	9.36e-06	14306	0.0014537	20.824	genus Holdemania id.2157	ebi-a-GCST90017015		-0.049	0.0453	0.2792	104247	3011	finn-b-O15_MEMBR_PREMAT_RUPT
1360	rs116500994	G	T	-0.13755	0.0293386	2.34e-06	14306	0.00153411	21.9777	genus Holdemania id.2157	ebi-a-GCST90017015		-0.055	0.0633	0.3853	104247	3011	finn-b-O15_MEMBR_PREMAT_RUPT
1361	rs12701617	A	G	-0.0660617	0.0149427	9.52e-06	14306	0.00136436	19.5425	genus Holdemania id.2157	ebi-a-GCST90017015		0.0214	0.0266	0.4209	104247	3011	finn-b-O15_MEMBR_PREMAT_RUPT
1362	rs150096134	T	A	0.162139	0.0332089	2.38e-06	14306	0.00166351	23.8345	genus Holdemania id.2157	ebi-a-GCST90017015		0.0738	0.0448	0.0991905	104247	3011	finn-b-O15_MEMBR_PREMAT_RUPT
1363	rs1867876	T	C	0.0842919	0.0162192	2.74e-07	14306	0.00188441	27.0055	genus Holdemania id.2157	ebi-a-GCST90017015		-0.0146	0.0292	0.6167	104247	3011	finn-b-O15_MEMBR_PREMAT_RUPT
1364	rs41438744	C	G	-0.124871	0.0270129	2.44e-06	14306	0.00149147	21.3658	genus Holdemania id.2157	ebi-a-GCST90017015		0.0221	0.049	0.652501	104247	3011	finn-b-O15_MEMBR_PREMAT_RUPT
1365	rs4146507	C	T	0.079488	0.0177002	7.23e-06	14306	0.00140772	20.1644	genus Holdemania id.2157	ebi-a-GCST90017015		-0.0218	0.0313	0.4857	104247	3011	finn-b-O15_MEMBR_PREMAT_RUPT
1366	rs55888180	C	G	0.128671	0.0282795	5.89e-06	14306	0.00144501	20.6994	genus Holdemania id.2157	ebi-a-GCST90017015		-0.0203	0.0593	0.7323	104247	3011	finn-b-O15_MEMBR_PREMAT_RUPT
1367	rs73139538	G	A	-0.148594	0.0327469	7.77e-06	14306	0.00143721	20.5874	genus Holdemania id.2157	ebi-a-GCST90017015		-0.0391	0.078	0.616	104247	3011	finn-b-O15_MEMBR_PREMAT_RUPT
1368	rs77293403	A	G	0.164556	0.0341775	1.77e-06	14306	0.0016178	23.1785	genus Holdemania id.2157	ebi-a-GCST90017015		-0.0825	0.0724	0.2545	104247	3011	finn-b-O15_MEMBR_PREMAT_RUPT
1369	rs80149660	C	T	-0.232987	0.0519183	6.04e-06	14306	0.0014057	20.1355	genus Holdemania id.2157	ebi-a-GCST90017015		0.0057	0.0655	0.9309	104247	3011	finn-b-O15_MEMBR_PREMAT_RUPT
1370	rs9500080	C	T	0.0926764	0.0178886	4.09e-07	14306	0.00187264	26.8364	genus Holdemania id.2157	ebi-a-GCST90017015		0.0043	0.0356	0.9049	104247	3011	finn-b-O15_MEMBR_PREMAT_RUPT
1371	rs9529719	C	T	-0.074038	0.0160494	5.97e-06	14306	0.00148535	21.278	genus Holdemania id.2157	ebi-a-GCST90017015		-0.0093	0.0287	0.744801	104247	3011	finn-b-O15_MEMBR_PREMAT_RUPT
1372	rs967319	T	C	0.0788638	0.0176744	8.38e-06	14306	0.00138977	19.907	genus Holdemania id.2157	ebi-a-GCST90017015		0.013	0.0313	0.676901	104247	3011	finn-b-O15_MEMBR_PREMAT_RUPT
1373	rs10048062	C	T	-0.147352	0.0336531	8.59e-06	14306	0.00133833	19.1691	genus Howardella id.2000	ebi-a-GCST90017016		0.0718	0.0473	0.129	104247	3011	finn-b-O15_MEMBR_PREMAT_RUPT
1374	rs12452946	A	G	-0.105833	0.0228941	3.8e-06	14306	0.00149152	21.3665	genus Howardella id.2000	ebi-a-GCST90017016		0.0013	0.0267	0.9608	104247	3011	finn-b-O15_MEMBR_PREMAT_RUPT
1375	rs1484873	G	A	0.227831	0.046335	2.56e-06	14306	0.00168716	24.1739	genus Howardella id.2000	ebi-a-GCST90017016		0.0475	0.0372	0.2022	104247	3011	finn-b-O15_MEMBR_PREMAT_RUPT
1376	rs17167098	G	A	-0.169366	0.0352068	1.12e-06	14306	0.00161502	23.1387	genus Howardella id.2000	ebi-a-GCST90017016		-0.0242	0.0389	0.5337	104247	3011	finn-b-O15_MEMBR_PREMAT_RUPT
1377	rs2154047	A	C	0.192557	0.0420093	9.97e-06	14306	0.00146647	21.0071	genus Howardella id.2000	ebi-a-GCST90017016		0.0562	0.0471	0.2332	104247	3011	finn-b-O15_MEMBR_PREMAT_RUPT
1378	rs36081916	T	C	-0.18123	0.0402987	4.7e-06	14306	0.00141171	20.2217	genus Howardella id.2000	ebi-a-GCST90017016		-0.0079	0.0475	0.8674	104247	3011	finn-b-O15_MEMBR_PREMAT_RUPT
1379	rs3791893	A	G	0.147035	0.034023	9.5e-06	14306	0.0013038	18.6739	genus Howardella id.2000	ebi-a-GCST90017016		-0.0557	0.0386	0.1493	104247	3011	finn-b-O15_MEMBR_PREMAT_RUPT
1380	rs609430	T	G	-0.112045	0.0239328	3.34e-06	14306	0.00152973	21.9148	genus Howardella id.2000	ebi-a-GCST90017016		0.0017	0.028	0.9524	104247	3011	finn-b-O15_MEMBR_PREMAT_RUPT
1381	rs61771805	A	T	-0.136779	0.0296811	4.03e-06	14306	0.00148223	21.2333	genus Howardella id.2000	ebi-a-GCST90017016		-0.0721	0.0419	0.0851099	104247	3011	finn-b-O15_MEMBR_PREMAT_RUPT
1382	rs672217	G	A	0.164146	0.0349993	3.52e-06	14306	0.00153517	21.9928	genus Howardella id.2000	ebi-a-GCST90017016		0.0341	0.0336	0.3102	104247	3011	finn-b-O15_MEMBR_PREMAT_RUPT
1383	rs10044993	A	C	-0.139547	0.0316748	8.07e-06	14306	0.0013549	19.4067	genus Hungatella id.11306	ebi-a-GCST90017017		-0.0799	0.0479	0.0950889	104247	3011	finn-b-O15_MEMBR_PREMAT_RUPT
1384	rs13128780	T	C	-0.149725	0.0312777	1.75e-06	14306	0.00159921	22.9118	genus Hungatella id.11306	ebi-a-GCST90017017		0.0105	0.0343	0.7583	104247	3011	finn-b-O15_MEMBR_PREMAT_RUPT
1385	rs13249325	T	G	-0.100023	0.0225883	9.69e-06	14306	0.00136874	19.6052	genus Hungatella id.11306	ebi-a-GCST90017017		0.0214	0.0268	0.4251	104247	3011	finn-b-O15_MEMBR_PREMAT_RUPT
1386	rs17092615	G	A	0.152235	0.0337867	7.38e-06	14306	0.00141711	20.2991	genus Hungatella id.11306	ebi-a-GCST90017017		0.0019	0.0388	0.9605	104247	3011	finn-b-O15_MEMBR_PREMAT_RUPT
1387	rs72759041	G	T	-0.126025	0.0282242	3.86e-06	14306	0.00139171	19.9347	genus Hungatella id.11306	ebi-a-GCST90017017		0.0371	0.0332	0.263	104247	3011	finn-b-O15_MEMBR_PREMAT_RUPT
1388	rs10805326	A	G	-0.0775151	0.0139665	3.55e-08	14306	0.00214855	30.799	genus Intestinibacter id.11345	ebi-a-GCST90017018		-0.0255	0.0293	0.3846	104247	3011	finn-b-O15_MEMBR_PREMAT_RUPT
1389	rs10805326	A	G	-0.0775151	0.0139665	3.55e-08	14306	0.00214855	30.799	genus Intestinibacter id.11345	ebi-a-GCST90017018		0.0972	0.2565	0.7048	104247	3011	finn-b-O15_MEMBR_PREMAT_RUPT
1390	rs11109097	T	C	-0.0624272	0.0138539	5.49e-06	14306	0.00141733	20.3022	genus Intestinibacter id.11345	ebi-a-GCST90017018		-0.0197	0.0269	0.4632	104247	3011	finn-b-O15_MEMBR_PREMAT_RUPT
1391	rs118030283	G	A	-0.151829	0.0324471	2.67e-06	14306	0.00152818	21.8926	genus Intestinibacter id.11345	ebi-a-GCST90017018		-0.0541	0.0642	0.3998	104247	3011	finn-b-O15_MEMBR_PREMAT_RUPT
1392	rs16938435	T	C	-0.112189	0.0235439	1.8e-06	14306	0.00158466	22.703	genus Intestinibacter id.11345	ebi-a-GCST90017018		-0.0331	0.0451	0.4634	104247	3011	finn-b-O15_MEMBR_PREMAT_RUPT
1393	rs2098844	T	C	0.0575295	0.0128416	6.79e-06	14306	0.00140093	20.067	genus Intestinibacter id.11345	ebi-a-GCST90017018		0.0354	0.0278	0.2028	104247	3011	finn-b-O15_MEMBR_PREMAT_RUPT
1394	rs2702387	G	A	-0.0608559	0.0132145	4.26e-06	14306	0.00148028	21.2052	genus Intestinibacter id.11345	ebi-a-GCST90017018		0.0099	0.0272	0.716	104247	3011	finn-b-O15_MEMBR_PREMAT_RUPT
1395	rs4327025	G	A	-0.0810346	0.0154397	1.64e-07	14306	0.00192181	27.5424	genus Intestinibacter id.11345	ebi-a-GCST90017018		-0.0277	0.0342	0.4175	104247	3011	finn-b-O15_MEMBR_PREMAT_RUPT
1396	rs447950	A	G	0.0628342	0.0136652	5.64e-06	14306	0.00147571	21.1397	genus Intestinibacter id.11345	ebi-a-GCST90017018		0.0199	0.0275	0.4691	104247	3011	finn-b-O15_MEMBR_PREMAT_RUPT
1397	rs478972	C	T	0.142681	0.0297116	1.82e-06	14306	0.00160939	23.0579	genus Intestinibacter id.11345	ebi-a-GCST90017018		0.0628	0.0463	0.1744	104247	3011	finn-b-O15_MEMBR_PREMAT_RUPT
1398	rs6062862	A	G	0.0924508	0.0204658	6.68e-06	14306	0.00142438	20.4034	genus Intestinibacter id.11345	ebi-a-GCST90017018		0.0155	0.0485	0.7493	104247	3011	finn-b-O15_MEMBR_PREMAT_RUPT
1399	rs62430350	T	C	0.151096	0.0351476	6.84e-06	14306	0.00129014	18.478	genus Intestinibacter id.11345	ebi-a-GCST90017018		-0.0901	0.0711	0.2052	104247	3011	finn-b-O15_MEMBR_PREMAT_RUPT
1400	rs68093214	C	T	0.0662258	0.0149877	9.26e-06	14306	0.00136293	19.522	genus Intestinibacter id.11345	ebi-a-GCST90017018		0.0537	0.0312	0.0852001	104247	3011	finn-b-O15_MEMBR_PREMAT_RUPT
1401	rs6875660	C	T	0.0890455	0.0193905	3.06e-06	14306	0.00147193	21.0856	genus Intestinibacter id.11345	ebi-a-GCST90017018		0.0121	0.0563	0.8302	104247	3011	finn-b-O15_MEMBR_PREMAT_RUPT
1402	rs893394	G	A	0.0583322	0.0130729	7.85e-06	14306	0.0013898	19.9073	genus Intestinibacter id.11345	ebi-a-GCST90017018		-0.0033	0.027	0.9025	104247	3011	finn-b-O15_MEMBR_PREMAT_RUPT
1403	rs9348442	C	T	0.099082	0.0221625	6.26e-06	14306	0.00139517	19.9844	genus Intestinibacter id.11345	ebi-a-GCST90017018		0.0339	0.04	0.3967	104247	3011	finn-b-O15_MEMBR_PREMAT_RUPT
1404	rs1000888	C	G	-0.0585038	0.013219	9.71e-06	14306	0.00136728	19.5844	genus Intestinimonas id.2062	ebi-a-GCST90017019		0.0168	0.0283	0.5535	104247	3011	finn-b-O15_MEMBR_PREMAT_RUPT
1405	rs10262702	T	C	0.0918017	0.0194885	2.06e-06	14306	0.00154865	22.1862	genus Intestinimonas id.2062	ebi-a-GCST90017019		0.0108	0.0407	0.7899	104247	3011	finn-b-O15_MEMBR_PREMAT_RUPT
1406	rs11258178	A	G	0.0660742	0.0134139	6.98e-07	14306	0.00169317	24.2601	genus Intestinimonas id.2062	ebi-a-GCST90017019		0.0261	0.0267	0.3285	104247	3011	finn-b-O15_MEMBR_PREMAT_RUPT
1407	rs12226153	A	G	-0.151142	0.0306922	5.12e-07	14306	0.00169223	24.2468	genus Intestinimonas id.2062	ebi-a-GCST90017019		-0.0406	0.1139	0.7218	104247	3011	finn-b-O15_MEMBR_PREMAT_RUPT
1408	rs12566247	T	A	0.0637084	0.0135355	2.19e-06	14306	0.00154616	22.1505	genus Intestinimonas id.2062	ebi-a-GCST90017019		-0.014	0.0271	0.604999	104247	3011	finn-b-O15_MEMBR_PREMAT_RUPT
1409	rs17067892	C	T	0.107194	0.0250013	6.38e-06	14306	0.00128333	18.3804	genus Intestinimonas id.2062	ebi-a-GCST90017019		0.0122	0.0469	0.7949	104247	3011	finn-b-O15_MEMBR_PREMAT_RUPT
1410	rs1859797	G	A	0.060368	0.0131793	4.12e-06	14306	0.00146445	20.9782	genus Intestinimonas id.2062	ebi-a-GCST90017019		-0.0267	0.0267	0.3178	104247	3011	finn-b-O15_MEMBR_PREMAT_RUPT
1411	rs2276760	A	G	-0.0685233	0.0152546	7.84e-06	14306	0.00140846	20.175	genus Intestinimonas id.2062	ebi-a-GCST90017019		-0.0084	0.0313	0.7879	104247	3011	finn-b-O15_MEMBR_PREMAT_RUPT
1412	rs2731794	C	T	0.120632	0.0257529	1.92e-06	14306	0.0015314	21.9388	genus Intestinimonas id.2062	ebi-a-GCST90017019		-0.0848	0.074	0.2518	104247	3011	finn-b-O15_MEMBR_PREMAT_RUPT
1413	rs2930225	T	G	-0.0729524	0.0152948	1.35e-06	14306	0.00158775	22.7474	genus Intestinimonas id.2062	ebi-a-GCST90017019		0.0296	0.0316	0.3478	104247	3011	finn-b-O15_MEMBR_PREMAT_RUPT
1414	rs4113676	A	C	-0.218507	0.0490152	7.42e-06	14306	0.00138723	19.8705	genus Intestinimonas id.2062	ebi-a-GCST90017019		0.174	0.1125	0.1221	104247	3011	finn-b-O15_MEMBR_PREMAT_RUPT
1415	rs4784055	T	C	-0.175324	0.038599	8.72e-07	14306	0.00144008	20.6286	genus Intestinimonas id.2062	ebi-a-GCST90017019		0.1222	0.0616	0.0474297	104247	3011	finn-b-O15_MEMBR_PREMAT_RUPT
1416	rs62240188	G	A	0.130074	0.0267179	2.2e-06	14306	0.00165401	23.6982	genus Intestinimonas id.2062	ebi-a-GCST90017019		0.0202	0.0461	0.6603	104247	3011	finn-b-O15_MEMBR_PREMAT_RUPT
1417	rs6934519	C	T	0.0692373	0.0151154	8.57e-06	14306	0.00146449	20.9788	genus Intestinimonas id.2062	ebi-a-GCST90017019		0.0476	0.0306	0.12	104247	3011	finn-b-O15_MEMBR_PREMAT_RUPT
1418	rs716604	A	G	0.0818068	0.0165992	8.57e-07	14306	0.00169492	24.2853	genus Intestinimonas id.2062	ebi-a-GCST90017019		-0.0253	0.0318	0.4253	104247	3011	finn-b-O15_MEMBR_PREMAT_RUPT
1419	rs7170984	T	C	-0.0658116	0.0140767	2.98e-06	14306	0.00152553	21.8546	genus Intestinimonas id.2062	ebi-a-GCST90017019		0.0144	0.0298	0.628801	104247	3011	finn-b-O15_MEMBR_PREMAT_RUPT
1420	rs72982915	C	T	0.183158	0.0402743	4.91e-06	14306	0.00144361	20.6793	genus Intestinimonas id.2062	ebi-a-GCST90017019		0.0444	0.0581	0.445	104247	3011	finn-b-O15_MEMBR_PREMAT_RUPT
1421	rs9823439	C	T	0.0581947	0.0131455	9.86e-06	14306	0.00136804	19.5953	genus Intestinimonas id.2062	ebi-a-GCST90017019		-0.0255	0.0269	0.3445	104247	3011	finn-b-O15_MEMBR_PREMAT_RUPT
1422	rs994794	G	C	-0.141905	0.0315074	7.31e-06	14306	0.00141591	20.2819	genus Intestinimonas id.2062	ebi-a-GCST90017019		0.0212	0.0772	0.784	104247	3011	finn-b-O15_MEMBR_PREMAT_RUPT
1423	rs1031599	T	G	0.078627	0.0175644	6.31e-06	14306	0.00139878	20.0362	genus Lachnoclostridium id.11308	ebi-a-GCST90017020		0.0601	0.0548	0.2726	104247	3011	finn-b-O15_MEMBR_PREMAT_RUPT
1424	rs12566975	T	C	-0.0468097	0.0105787	9.57e-06	14306	0.00136677	19.577	genus Lachnoclostridium id.11308	ebi-a-GCST90017020		0.0157	0.0268	0.5574	104247	3011	finn-b-O15_MEMBR_PREMAT_RUPT
1425	rs1528479	A	G	0.0497799	0.0111919	9.64e-06	14306	0.00138096	19.7806	genus Lachnoclostridium id.11308	ebi-a-GCST90017020		-0.0323	0.0278	0.244	104247	3011	finn-b-O15_MEMBR_PREMAT_RUPT
1426	rs1997204	C	T	0.108075	0.0242022	5.97e-06	14306	0.00139193	19.9379	genus Lachnoclostridium id.11308	ebi-a-GCST90017020		-0.0071	0.0647	0.9125	104247	3011	finn-b-O15_MEMBR_PREMAT_RUPT
1427	rs2385421	A	G	0.0746186	0.0180734	7.14e-06	14306	0.00119009	17.0433	genus Lachnoclostridium id.11308	ebi-a-GCST90017020		0.0147	0.0417	0.724599	104247	3011	finn-b-O15_MEMBR_PREMAT_RUPT
1428	rs3821998	C	A	-0.0864066	0.0192519	6.72e-06	14306	0.0014061	20.1412	genus Lachnoclostridium id.11308	ebi-a-GCST90017020		-0.0722	0.0437	0.0987507	104247	3011	finn-b-O15_MEMBR_PREMAT_RUPT
1429	rs4738679	A	G	0.0520267	0.011404	4.42e-06	14306	0.00145274	20.8103	genus Lachnoclostridium id.11308	ebi-a-GCST90017020		0.0102	0.0274	0.7093	104247	3011	finn-b-O15_MEMBR_PREMAT_RUPT
1430	rs6112314	A	C	-0.0561715	0.0108174	2.43e-07	14306	0.00188127	26.9604	genus Lachnoclostridium id.11308	ebi-a-GCST90017020		-0.0307	0.0283	0.2795	104247	3011	finn-b-O15_MEMBR_PREMAT_RUPT
1431	rs615997	T	C	0.0511752	0.0106491	2.03e-06	14306	0.00161166	23.0905	genus Lachnoclostridium id.11308	ebi-a-GCST90017020		-0.0439	0.0266	0.0994604	104247	3011	finn-b-O15_MEMBR_PREMAT_RUPT
1432	rs62028349	G	C	0.0469989	0.0105971	9.17e-06	14306	0.00137305	19.6671	genus Lachnoclostridium id.11308	ebi-a-GCST90017020		-0.0271	0.0268	0.3124	104247	3011	finn-b-O15_MEMBR_PREMAT_RUPT
1433	rs62285313	A	G	0.0864203	0.0181565	1.58e-06	14306	0.00158111	22.652	genus Lachnoclostridium id.11308	ebi-a-GCST90017020		0.0729	0.0452	0.1071	104247	3011	finn-b-O15_MEMBR_PREMAT_RUPT
1434	rs72829893	G	T	0.117472	0.0268103	5.58e-06	14306	0.00134019	19.1957	genus Lachnoclostridium id.11308	ebi-a-GCST90017020		0.0707	0.0436	0.1045	104247	3011	finn-b-O15_MEMBR_PREMAT_RUPT
1435	rs78068103	A	G	0.0886199	0.0194248	3.67e-06	14306	0.00145278	20.8108	genus Lachnoclostridium id.11308	ebi-a-GCST90017020		0.0027	0.0419	0.948	104247	3011	finn-b-O15_MEMBR_PREMAT_RUPT
1436	rs789029	C	T	-0.0641288	0.0137974	3.75e-06	14306	0.00150778	21.5999	genus Lachnoclostridium id.11308	ebi-a-GCST90017020		-0.0205	0.0384	0.5927	104247	3011	finn-b-O15_MEMBR_PREMAT_RUPT
1437	rs10093861	G	A	-0.0568869	0.0121152	3.06e-06	14306	0.00153878	22.0446	genus Lachnospiraceae FCS020 group id.11314	ebi-a-GCST90017021		0.0122	0.0272	0.653899	104247	3011	finn-b-O15_MEMBR_PREMAT_RUPT
1438	rs113859143	G	C	-0.108906	0.0242055	2.55e-06	14306	0.001413	20.2402	genus Lachnospiraceae FCS020 group id.11314	ebi-a-GCST90017021		0.0448	0.0577	0.437	104247	3011	finn-b-O15_MEMBR_PREMAT_RUPT
1439	rs12078956	C	G	0.106101	0.0222904	2.15e-06	14306	0.00158124	22.6539	genus Lachnospiraceae FCS020 group id.11314	ebi-a-GCST90017021		0.0018	0.0428	0.9664	104247	3011	finn-b-O15_MEMBR_PREMAT_RUPT
1440	rs1254846	A	G	-0.105963	0.0232501	5.6e-06	14306	0.00144981	20.7682	genus Lachnospiraceae FCS020 group id.11314	ebi-a-GCST90017021		-0.0516	0.0397	0.1939	104247	3011	finn-b-O15_MEMBR_PREMAT_RUPT
1441	rs1363769	C	T	0.200628	0.0449372	1.58e-06	14306	0.00139139	19.9301	genus Lachnospiraceae FCS020 group id.11314	ebi-a-GCST90017021		-0.1829	0.0759	0.0160502	104247	3011	finn-b-O15_MEMBR_PREMAT_RUPT
1442	rs2322265	C	T	-0.0666305	0.0141577	5.21e-06	14306	0.00154586	22.1462	genus Lachnospiraceae FCS020 group id.11314	ebi-a-GCST90017021		-0.0213	0.0305	0.4855	104247	3011	finn-b-O15_MEMBR_PREMAT_RUPT
1443	rs2862811	C	T	-0.0564927	0.0121736	3.92e-06	14306	0.00150306	21.5321	genus Lachnospiraceae FCS020 group id.11314	ebi-a-GCST90017021		0.0469	0.0293	0.1092	104247	3011	finn-b-O15_MEMBR_PREMAT_RUPT
1444	rs35035870	T	C	-0.190615	0.0414403	2.62e-06	14306	0.00147675	21.1547	genus Lachnospiraceae FCS020 group id.11314	ebi-a-GCST90017021		-0.0965	0.0682	0.1572	104247	3011	finn-b-O15_MEMBR_PREMAT_RUPT
1445	rs369444	C	G	0.125481	0.0259008	3.15e-06	14306	0.00163795	23.4676	genus Lachnospiraceae FCS020 group id.11314	ebi-a-GCST90017021		-0.0501	0.0516	0.332	104247	3011	finn-b-O15_MEMBR_PREMAT_RUPT
1446	rs3999074	G	T	-0.0550587	0.0121847	6.55e-06	14306	0.00142523	20.4156	genus Lachnospiraceae FCS020 group id.11314	ebi-a-GCST90017021		-0.0042	0.0268	0.8743	104247	3011	finn-b-O15_MEMBR_PREMAT_RUPT
1447	rs4452603	T	G	0.0604208	0.0135965	8.98e-06	14306	0.00137848	19.745	genus Lachnospiraceae FCS020 group id.11314	ebi-a-GCST90017021		-0.0458	0.0303	0.1301	104247	3011	finn-b-O15_MEMBR_PREMAT_RUPT
1448	rs7249113	G	A	0.0679483	0.0133496	3.72e-07	14306	0.00180766	25.9036	genus Lachnospiraceae FCS020 group id.11314	ebi-a-GCST90017021		-0.0007	0.0292	0.9822	104247	3011	finn-b-O15_MEMBR_PREMAT_RUPT
1449	rs72793667	A	G	-0.116881	0.0246589	1.63e-06	14306	0.00156798	22.4636	genus Lachnospiraceae FCS020 group id.11314	ebi-a-GCST90017021		0.0291	0.0684	0.670101	104247	3011	finn-b-O15_MEMBR_PREMAT_RUPT
1450	rs9308097	G	A	-0.055381	0.0123659	7.47e-06	14306	0.00140005	20.0544	genus Lachnospiraceae FCS020 group id.11314	ebi-a-GCST90017021		0.0092	0.0267	0.7291	104247	3011	finn-b-O15_MEMBR_PREMAT_RUPT
1451	rs9788306	C	T	-0.062804	0.0130744	1.39e-06	14306	0.00161032	23.0712	genus Lachnospiraceae FCS020 group id.11314	ebi-a-GCST90017021		-0.0166	0.0296	0.5745	104247	3011	finn-b-O15_MEMBR_PREMAT_RUPT
1452	rs9919338	G	C	-0.0553339	0.0120621	4.91e-06	14306	0.00146886	21.0415	genus Lachnospiraceae FCS020 group id.11314	ebi-a-GCST90017021		0.037	0.0269	0.1689	104247	3011	finn-b-O15_MEMBR_PREMAT_RUPT
1453	rs117467633	T	C	-0.169687	0.0383169	9.13e-06	14306	0.001369	19.609	genus Lachnospiraceae NC2004 group id.11316	ebi-a-GCST90017022		-0.086	0.0687	0.2107	104247	3011	finn-b-O15_MEMBR_PREMAT_RUPT
1454	rs12127733	G	A	0.115182	0.0246006	3.11e-06	14306	0.00153001	21.9188	genus Lachnospiraceae NC2004 group id.11316	ebi-a-GCST90017022		0.0176	0.0347	0.6128	104247	3011	finn-b-O15_MEMBR_PREMAT_RUPT
1455	rs12208226	C	A	-0.154739	0.0340372	9.75e-06	14306	0.0014426	20.6648	genus Lachnospiraceae NC2004 group id.11316	ebi-a-GCST90017022		0.0105	0.043	0.8069	104247	3011	finn-b-O15_MEMBR_PREMAT_RUPT
1456	rs12863463	G	A	-0.156365	0.0345372	6.04e-06	14306	0.00143075	20.4948	genus Lachnospiraceae NC2004 group id.11316	ebi-a-GCST90017022		0.1173	0.0501	0.0192101	104247	3011	finn-b-O15_MEMBR_PREMAT_RUPT
1457	rs1331592	G	C	-0.0948806	0.0208369	5.34e-06	14306	0.00144724	20.7314	genus Lachnospiraceae NC2004 group id.11316	ebi-a-GCST90017022		-0.0157	0.0315	0.617701	104247	3011	finn-b-O15_MEMBR_PREMAT_RUPT
1458	rs17067076	G	A	-0.154631	0.0352194	5.61e-06	14306	0.00134563	19.2739	genus Lachnospiraceae NC2004 group id.11316	ebi-a-GCST90017022		0.0236	0.042	0.5732	104247	3011	finn-b-O15_MEMBR_PREMAT_RUPT
1459	rs1928659	T	C	0.102522	0.0226445	6.17e-06	14306	0.00143077	20.495	genus Lachnospiraceae NC2004 group id.11316	ebi-a-GCST90017022		0.0476	0.0335	0.1553	104247	3011	finn-b-O15_MEMBR_PREMAT_RUPT
1460	rs1929743	T	C	0.0837206	0.0190318	9.06e-06	14306	0.00135083	19.3484	genus Lachnospiraceae NC2004 group id.11316	ebi-a-GCST90017022		-0.0002	0.0282	0.9947	104247	3011	finn-b-O15_MEMBR_PREMAT_RUPT
1461	rs3756315	A	G	-0.0883469	0.0188397	3.33e-06	14306	0.00153479	21.9874	genus Lachnospiraceae NC2004 group id.11316	ebi-a-GCST90017022		-0.0172	0.0293	0.5573	104247	3011	finn-b-O15_MEMBR_PREMAT_RUPT
1462	rs6116753	G	A	0.0994748	0.0209139	2.92e-06	14306	0.00157889	22.6201	genus Lachnospiraceae NC2004 group id.11316	ebi-a-GCST90017022		-0.0348	0.0349	0.319	104247	3011	finn-b-O15_MEMBR_PREMAT_RUPT
1463	rs2861203	G	A	0.0572304	0.0127279	7.37e-06	14306	0.00141127	20.2153	genus Lachnospiraceae ND3007 group id.11317	ebi-a-GCST90017023		0.0207	0.0294	0.4807	104247	3011	finn-b-O15_MEMBR_PREMAT_RUPT
1464	rs72776675	T	C	-0.0647067	0.014797	8.72e-06	14306	0.00133491	19.1201	genus Lachnospiraceae ND3007 group id.11317	ebi-a-GCST90017023		0.0599	0.0354	0.0906901	104247	3011	finn-b-O15_MEMBR_PREMAT_RUPT
1465	rs9932954	A	G	-0.0561864	0.0115984	1.25e-06	14306	0.00163771	23.4642	genus Lachnospiraceae ND3007 group id.11317	ebi-a-GCST90017023		0.0177	0.0283	0.5326	104247	3011	finn-b-O15_MEMBR_PREMAT_RUPT
1466	rs10952110	G	T	0.0487709	0.0109614	9.08e-06	14306	0.00138188	19.7938	genus Lachnospiraceae NK4A136 group id.11319	ebi-a-GCST90017024		-0.031	0.027	0.2511	104247	3011	finn-b-O15_MEMBR_PREMAT_RUPT
1467	rs11263806	A	G	-0.0524615	0.0116758	5.07e-06	14306	0.00140922	20.1859	genus Lachnospiraceae NK4A136 group id.11319	ebi-a-GCST90017024		0.0126	0.0282	0.656401	104247	3011	finn-b-O15_MEMBR_PREMAT_RUPT
1468	rs12362320	G	C	0.0573168	0.0115466	8.04e-07	14306	0.00171945	24.6374	genus Lachnospiraceae NK4A136 group id.11319	ebi-a-GCST90017024		-0.0092	0.0271	0.7338	104247	3011	finn-b-O15_MEMBR_PREMAT_RUPT
1469	rs12611395	G	A	0.0902532	0.0199652	5.83e-06	14306	0.0014264	20.4323	genus Lachnospiraceae NK4A136 group id.11319	ebi-a-GCST90017024		-0.0352	0.0434	0.4179	104247	3011	finn-b-O15_MEMBR_PREMAT_RUPT
1470	rs160061	G	A	-0.0513831	0.0108094	2.12e-06	14306	0.00157701	22.5931	genus Lachnospiraceae NK4A136 group id.11319	ebi-a-GCST90017024		0.0349	0.0268	0.1918	104247	3011	finn-b-O15_MEMBR_PREMAT_RUPT
1471	rs28540839	A	C	0.0508285	0.0110591	9.34e-06	14306	0.0014744	21.121	genus Lachnospiraceae NK4A136 group id.11319	ebi-a-GCST90017024		-0.019	0.0268	0.4788	104247	3011	finn-b-O15_MEMBR_PREMAT_RUPT
1472	rs2880566	T	C	0.0599578	0.0134693	5.61e-06	14306	0.00138319	19.8126	genus Lachnospiraceae NK4A136 group id.11319	ebi-a-GCST90017024		0.0362	0.0378	0.3389	104247	3011	finn-b-O15_MEMBR_PREMAT_RUPT
1473	rs4955932	T	C	-0.0492283	0.0109388	7.05e-06	14306	0.0014137	20.2502	genus Lachnospiraceae NK4A136 group id.11319	ebi-a-GCST90017024		-0.0167	0.0277	0.5459	104247	3011	finn-b-O15_MEMBR_PREMAT_RUPT
1474	rs59805249	T	C	0.0936162	0.0207982	9.45e-06	14306	0.00141422	20.2577	genus Lachnospiraceae NK4A136 group id.11319	ebi-a-GCST90017024		-0.0289	0.0464	0.5325	104247	3011	finn-b-O15_MEMBR_PREMAT_RUPT
1475	rs68104925	T	C	-0.0549104	0.0115385	2.37e-06	14306	0.00158054	22.6438	genus Lachnospiraceae NK4A136 group id.11319	ebi-a-GCST90017024		-0.0101	0.029	0.7286	104247	3011	finn-b-O15_MEMBR_PREMAT_RUPT
1476	rs7073658	G	T	0.0499621	0.0109693	5.27e-06	14306	0.00144802	20.7426	genus Lachnospiraceae NK4A136 group id.11319	ebi-a-GCST90017024		0.0404	0.0268	0.1311	104247	3011	finn-b-O15_MEMBR_PREMAT_RUPT
1477	rs73044693	A	G	-0.10758	0.0229884	3.57e-06	14306	0.00152849	21.897	genus Lachnospiraceae NK4A136 group id.11319	ebi-a-GCST90017024		-0.0591	0.053	0.2645	104247	3011	finn-b-O15_MEMBR_PREMAT_RUPT
1478	rs7616165	G	T	-0.230542	0.0483465	2.77e-06	14306	0.00158695	22.7358	genus Lachnospiraceae NK4A136 group id.11319	ebi-a-GCST90017024		-0.0217	0.0847	0.7979	104247	3011	finn-b-O15_MEMBR_PREMAT_RUPT
1479	rs76193507	A	G	-0.22973	0.0499776	2.93e-06	14306	0.00147477	21.1263	genus Lachnospiraceae NK4A136 group id.11319	ebi-a-GCST90017024		-0.0288	0.0477	0.5455	104247	3011	finn-b-O15_MEMBR_PREMAT_RUPT
1480	rs7832116	A	G	-0.0714756	0.0151703	3.57e-06	14306	0.0015493	22.1956	genus Lachnospiraceae NK4A136 group id.11319	ebi-a-GCST90017024		0.0014	0.04	0.9721	104247	3011	finn-b-O15_MEMBR_PREMAT_RUPT
1481	rs954878	A	G	-0.0520656	0.0109082	1.78e-06	14306	0.00158996	22.779	genus Lachnospiraceae NK4A136 group id.11319	ebi-a-GCST90017024		-0.0062	0.0276	0.8237	104247	3011	finn-b-O15_MEMBR_PREMAT_RUPT
1482	rs10815577	C	G	-0.0683706	0.0143691	1.72e-06	14306	0.00158006	22.637	genus Lachnospiraceae UCG001 id.11321	ebi-a-GCST90017025		0.0438	0.0271	0.1054	104247	3011	finn-b-O15_MEMBR_PREMAT_RUPT
1483	rs12131224	C	T	0.117095	0.02591	7.4e-06	14306	0.00142562	20.4212	genus Lachnospiraceae UCG001 id.11321	ebi-a-GCST90017025		-0.0073	0.043	0.8661	104247	3011	finn-b-O15_MEMBR_PREMAT_RUPT
1484	rs2050911	G	A	0.0751466	0.0153934	1.11e-06	14306	0.00166306	23.8281	genus Lachnospiraceae UCG001 id.11321	ebi-a-GCST90017025		-0.022	0.0281	0.4336	104247	3011	finn-b-O15_MEMBR_PREMAT_RUPT
1485	rs2371284	C	T	0.0761893	0.0170127	7.56e-06	14306	0.00139996	20.0531	genus Lachnospiraceae UCG001 id.11321	ebi-a-GCST90017025		-0.005	0.0319	0.8765	104247	3011	finn-b-O15_MEMBR_PREMAT_RUPT
1486	rs437876	T	C	0.0784637	0.0144768	7.17e-08	14306	0.0020492	29.3719	genus Lachnospiraceae UCG001 id.11321	ebi-a-GCST90017025		-0.0204	0.028	0.4659	104247	3011	finn-b-O15_MEMBR_PREMAT_RUPT
1487	rs4981345	T	C	-0.0681973	0.0149831	6.09e-06	14306	0.00144605	20.7143	genus Lachnospiraceae UCG001 id.11321	ebi-a-GCST90017025		0.0089	0.0284	0.7541	104247	3011	finn-b-O15_MEMBR_PREMAT_RUPT
1488	rs573933	T	C	-0.107898	0.0232346	3.11e-06	14306	0.00150516	21.5623	genus Lachnospiraceae UCG001 id.11321	ebi-a-GCST90017025		-0.0499	0.0433	0.2497	104247	3011	finn-b-O15_MEMBR_PREMAT_RUPT
1489	rs62496417	T	G	-0.0748504	0.0165681	5.88e-06	14306	0.00142464	20.4071	genus Lachnospiraceae UCG001 id.11321	ebi-a-GCST90017025		-0.0471	0.0325	0.1468	104247	3011	finn-b-O15_MEMBR_PREMAT_RUPT
1490	rs7213933	T	A	-0.0816269	0.01838	9.02e-06	14306	0.00137676	19.7204	genus Lachnospiraceae UCG001 id.11321	ebi-a-GCST90017025		0.0491	0.0367	0.1809	104247	3011	finn-b-O15_MEMBR_PREMAT_RUPT
1491	rs7341608	T	C	-0.0784757	0.0177648	9.48e-06	14306	0.0013622	19.5114	genus Lachnospiraceae UCG001 id.11321	ebi-a-GCST90017025		-0.0308	0.0393	0.4339	104247	3011	finn-b-O15_MEMBR_PREMAT_RUPT
1492	rs74034332	G	A	0.168045	0.0382637	3.33e-06	14306	0.0013464	19.2849	genus Lachnospiraceae UCG001 id.11321	ebi-a-GCST90017025		-0.0094	0.0551	0.8639	104247	3011	finn-b-O15_MEMBR_PREMAT_RUPT
1493	rs78848836	A	G	-0.118868	0.0259753	3.38e-06	14306	0.00146169	20.9386	genus Lachnospiraceae UCG001 id.11321	ebi-a-GCST90017025		-0.0267	0.0438	0.5414	104247	3011	finn-b-O15_MEMBR_PREMAT_RUPT
1494	rs79476906	T	A	-0.087088	0.0197008	8.27e-06	14306	0.00136407	19.5384	genus Lachnospiraceae UCG001 id.11321	ebi-a-GCST90017025		-0.0006	0.0371	0.9865	104247	3011	finn-b-O15_MEMBR_PREMAT_RUPT
1495	rs8104225	A	G	0.0892098	0.0197665	8.04e-06	14306	0.00142177	20.366	genus Lachnospiraceae UCG001 id.11321	ebi-a-GCST90017025		-0.002	0.0322	0.9498	104247	3011	finn-b-O15_MEMBR_PREMAT_RUPT
1496	rs9403580	C	T	0.107801	0.0229777	3.47e-06	14306	0.0015362	22.0076	genus Lachnospiraceae UCG001 id.11321	ebi-a-GCST90017025		0.0498	0.0399	0.2118	104247	3011	finn-b-O15_MEMBR_PREMAT_RUPT
1497	rs985416	T	C	-0.0970258	0.0181807	1.46e-07	14306	0.00198688	28.4769	genus Lachnospiraceae UCG001 id.11321	ebi-a-GCST90017025		0.0142	0.0348	0.6829	104247	3011	finn-b-O15_MEMBR_PREMAT_RUPT
1498	rs11128180	A	G	0.0648288	0.0140126	4.52e-06	14306	0.00149393	21.4012	genus Lachnospiraceae UCG004 id.11324	ebi-a-GCST90017026		0.0212	0.0315	0.5012	104247	3011	finn-b-O15_MEMBR_PREMAT_RUPT
1499	rs12072562	T	C	0.133104	0.0303566	7.07e-06	14306	0.00134207	19.2227	genus Lachnospiraceae UCG004 id.11324	ebi-a-GCST90017026		0.0686	0.0698	0.3255	104247	3011	finn-b-O15_MEMBR_PREMAT_RUPT
1500	rs12673420	G	A	0.0554351	0.0118375	2.98e-06	14306	0.00153062	21.9275	genus Lachnospiraceae UCG004 id.11324	ebi-a-GCST90017026		-0.0085	0.0268	0.7508	104247	3011	finn-b-O15_MEMBR_PREMAT_RUPT
1501	rs12747809	A	G	0.062197	0.0125685	8.65e-07	14306	0.00170888	24.4856	genus Lachnospiraceae UCG004 id.11324	ebi-a-GCST90017026		0.0412	0.0297	0.1655	104247	3011	finn-b-O15_MEMBR_PREMAT_RUPT
1502	rs12894272	G	A	-0.0579792	0.0125229	4.34e-06	14306	0.00149612	21.4326	genus Lachnospiraceae UCG004 id.11324	ebi-a-GCST90017026		0.0042	0.0282	0.8818	104247	3011	finn-b-O15_MEMBR_PREMAT_RUPT
1503	rs233486	G	A	0.0799088	0.017766	6.28e-06	14306	0.00141214	20.2278	genus Lachnospiraceae UCG004 id.11324	ebi-a-GCST90017026		-0.0052	0.0386	0.8918	104247	3011	finn-b-O15_MEMBR_PREMAT_RUPT
1504	rs2444793	T	C	0.0542433	0.0118188	4.77e-06	14306	0.00147024	21.0613	genus Lachnospiraceae UCG004 id.11324	ebi-a-GCST90017026		-0.0052	0.0274	0.8507	104247	3011	finn-b-O15_MEMBR_PREMAT_RUPT
1505	rs2706242	G	C	-0.0901399	0.0199712	9.84e-06	14306	0.00142197	20.3688	genus Lachnospiraceae UCG004 id.11324	ebi-a-GCST90017026		-0.0535	0.0477	0.2617	104247	3011	finn-b-O15_MEMBR_PREMAT_RUPT
1506	rs2726805	A	G	0.0548397	0.0120844	6.3e-06	14306	0.00143746	20.5911	genus Lachnospiraceae UCG004 id.11324	ebi-a-GCST90017026		0.0266	0.027	0.3247	104247	3011	finn-b-O15_MEMBR_PREMAT_RUPT
1507	rs2882478	G	A	-0.0577091	0.0118338	1.21e-06	14306	0.00165959	23.7782	genus Lachnospiraceae UCG004 id.11324	ebi-a-GCST90017026		0.0112	0.0268	0.674899	104247	3011	finn-b-O15_MEMBR_PREMAT_RUPT
1508	rs35182105	A	G	-0.109724	0.024221	4.87e-06	14306	0.00143245	20.5191	genus Lachnospiraceae UCG004 id.11324	ebi-a-GCST90017026		-0.0043	0.0593	0.9423	104247	3011	finn-b-O15_MEMBR_PREMAT_RUPT
1509	rs6656451	T	C	0.05436	0.011947	5.57e-06	14306	0.00144509	20.7005	genus Lachnospiraceae UCG004 id.11324	ebi-a-GCST90017026		-0.0025	0.0267	0.9251	104247	3011	finn-b-O15_MEMBR_PREMAT_RUPT
1510	rs7629954	A	G	0.108441	0.023825	5.77e-06	14306	0.00144602	20.7138	genus Lachnospiraceae UCG004 id.11324	ebi-a-GCST90017026		-0.0454	0.0651	0.4854	104247	3011	finn-b-O15_MEMBR_PREMAT_RUPT
1511	rs10741777	T	C	-0.0973842	0.0194791	7.69e-07	14306	0.00174407	24.9907	genus Lachnospiraceae UCG008 id.11328	ebi-a-GCST90017027		-0.0619	0.029	0.0326002	104247	3011	finn-b-O15_MEMBR_PREMAT_RUPT
1512	rs10793103	T	C	-0.0974344	0.0181279	9.35e-08	14306	0.00201528	28.8848	genus Lachnospiraceae UCG008 id.11328	ebi-a-GCST90017027		0.0013	0.0268	0.9606	104247	3011	finn-b-O15_MEMBR_PREMAT_RUPT
1513	rs10801803	G	A	-0.117029	0.0243085	1.4e-06	14306	0.00161752	23.1745	genus Lachnospiraceae UCG008 id.11328	ebi-a-GCST90017027		-0.0635	0.038	0.0950802	104247	3011	finn-b-O15_MEMBR_PREMAT_RUPT
1514	rs13024781	T	C	-0.0798769	0.0168846	2.29e-06	14306	0.00156194	22.3769	genus Lachnospiraceae UCG008 id.11328	ebi-a-GCST90017027		-0.0213	0.0269	0.4275	104247	3011	finn-b-O15_MEMBR_PREMAT_RUPT
1515	rs57091572	A	G	-0.110443	0.0235801	2.86e-06	14306	0.00153109	21.9343	genus Lachnospiraceae UCG008 id.11328	ebi-a-GCST90017027		-0.0237	0.0397	0.5499	104247	3011	finn-b-O15_MEMBR_PREMAT_RUPT
1516	rs57254474	G	A	0.0886512	0.0199045	6.92e-06	14306	0.00138467	19.8338	genus Lachnospiraceae UCG008 id.11328	ebi-a-GCST90017027		0.0125	0.0327	0.702399	104247	3011	finn-b-O15_MEMBR_PREMAT_RUPT
1517	rs61944774	A	G	0.179838	0.0393797	6.34e-06	14306	0.00145568	20.8525	genus Lachnospiraceae UCG008 id.11328	ebi-a-GCST90017027		0.0373	0.0597	0.532299	104247	3011	finn-b-O15_MEMBR_PREMAT_RUPT
1518	rs62277846	C	T	0.102292	0.0212319	1.59e-06	14306	0.00161988	23.2084	genus Lachnospiraceae UCG008 id.11328	ebi-a-GCST90017027		-0.025	0.034	0.4614	104247	3011	finn-b-O15_MEMBR_PREMAT_RUPT
1519	rs67078837	T	C	-0.0845848	0.0170693	7.68e-07	14306	0.00171352	24.5523	genus Lachnospiraceae UCG008 id.11328	ebi-a-GCST90017027		-0.0198	0.0271	0.466	104247	3011	finn-b-O15_MEMBR_PREMAT_RUPT
1520	rs75356640	G	A	0.136523	0.0303128	9.83e-06	14306	0.00141588	20.2814	genus Lachnospiraceae UCG008 id.11328	ebi-a-GCST90017027		-0.0649	0.0407	0.1106	104247	3011	finn-b-O15_MEMBR_PREMAT_RUPT
1521	rs955844	A	C	0.112064	0.0228369	1.81e-06	14306	0.00168039	24.0767	genus Lachnospiraceae UCG008 id.11328	ebi-a-GCST90017027		-0.0181	0.0386	0.6388	104247	3011	finn-b-O15_MEMBR_PREMAT_RUPT
1522	rs9873555	G	C	-0.121162	0.0233467	2.41e-07	14306	0.00187909	26.9291	genus Lachnospiraceae UCG008 id.11328	ebi-a-GCST90017027		0.0543	0.0415	0.1908	104247	3011	finn-b-O15_MEMBR_PREMAT_RUPT
1523	rs10414815	C	T	-0.10453	0.0230253	4.24e-06	14306	0.00143856	20.6068	genus Lachnospiraceae UCG010 id.11330	ebi-a-GCST90017028		0.0512	0.0642	0.4247	104247	3011	finn-b-O15_MEMBR_PREMAT_RUPT
1524	rs11192447	A	G	0.126592	0.024345	4.69e-07	14306	0.00188649	27.0354	genus Lachnospiraceae UCG010 id.11330	ebi-a-GCST90017028		-0.0528	0.0619	0.3937	104247	3011	finn-b-O15_MEMBR_PREMAT_RUPT
1525	rs12346653	C	T	0.0657686	0.0139569	2.7e-06	14306	0.00154977	22.2023	genus Lachnospiraceae UCG010 id.11330	ebi-a-GCST90017028		0.0086	0.0328	0.7925	104247	3011	finn-b-O15_MEMBR_PREMAT_RUPT
1526	rs17730011	G	A	-0.0702357	0.015706	7.85e-06	14306	0.00139592	19.9951	genus Lachnospiraceae UCG010 id.11330	ebi-a-GCST90017028		0.0362	0.0326	0.2674	104247	3011	finn-b-O15_MEMBR_PREMAT_RUPT
1527	rs2153460	A	T	-0.0684038	0.0156562	9.17e-06	14306	0.00133257	19.0865	genus Lachnospiraceae UCG010 id.11330	ebi-a-GCST90017028		-0.0626	0.036	0.0822205	104247	3011	finn-b-O15_MEMBR_PREMAT_RUPT
1528	rs2833528	T	C	0.0562148	0.0127763	9.92e-06	14306	0.0013514	19.3567	genus Lachnospiraceae UCG010 id.11330	ebi-a-GCST90017028		0.0198	0.0277	0.4747	104247	3011	finn-b-O15_MEMBR_PREMAT_RUPT
1529	rs336138	G	T	0.0779543	0.0171865	7.48e-06	14306	0.00143603	20.5705	genus Lachnospiraceae UCG010 id.11330	ebi-a-GCST90017028		-0.055	0.0418	0.1876	104247	3011	finn-b-O15_MEMBR_PREMAT_RUPT
1530	rs4576377	C	A	0.0572001	0.0127043	7.63e-06	14306	0.00141501	20.269	genus Lachnospiraceae UCG010 id.11330	ebi-a-GCST90017028		-0.0003	0.0277	0.9925	104247	3011	finn-b-O15_MEMBR_PREMAT_RUPT
1531	rs72761829	A	T	0.111884	0.0238893	2.58e-06	14306	0.00153089	21.9315	genus Lachnospiraceae UCG010 id.11330	ebi-a-GCST90017028		-0.0508	0.0472	0.2814	104247	3011	finn-b-O15_MEMBR_PREMAT_RUPT
1532	rs72894957	G	A	0.222263	0.0486425	5.68e-06	14306	0.00145731	20.8757	genus Lachnospiraceae UCG010 id.11330	ebi-a-GCST90017028		0.0063	0.0892	0.9439	104247	3011	finn-b-O15_MEMBR_PREMAT_RUPT
1533	rs74315802	G	T	0.0867262	0.0183477	3.19e-06	14306	0.00155934	22.3397	genus Lachnospiraceae UCG010 id.11330	ebi-a-GCST90017028		0.0419	0.035	0.2323	104247	3011	finn-b-O15_MEMBR_PREMAT_RUPT
1534	rs9981767	A	C	0.0655062	0.0131994	9.96e-07	14306	0.00171867	24.6261	genus Lachnospiraceae UCG010 id.11330	ebi-a-GCST90017028		0.0379	0.0308	0.2186	104247	3011	finn-b-O15_MEMBR_PREMAT_RUPT
1535	rs56791201	C	TRUE	-0.051823	0.0110697	2.93e-06	14306	0.00152964	21.9135	genus Lachnospira id.2004	ebi-a-GCST90017029		-0.051	0.0278	0.0665702	104247	3011	finn-b-O15_MEMBR_PREMAT_RUPT
1536	rs12693845	C	T	-0.0805447	0.0177429	8.96e-06	14306	0.00143841	20.6046	genus Lactobacillus id.1837	ebi-a-GCST90017030		0.0087	0.0276	0.751701	104247	3011	finn-b-O15_MEMBR_PREMAT_RUPT
1537	rs1530559	G	A	0.0804001	0.0178207	4.93e-06	14306	0.00142078	20.3518	genus Lactobacillus id.1837	ebi-a-GCST90017030		0.0086	0.027	0.75	104247	3011	finn-b-O15_MEMBR_PREMAT_RUPT
1538	rs16861661	G	A	-0.183147	0.038148	1.28e-06	14306	0.00160856	23.046	genus Lactobacillus id.1837	ebi-a-GCST90017030		-0.0318	0.0537	0.554	104247	3011	finn-b-O15_MEMBR_PREMAT_RUPT
1539	rs328312	T	A	0.0815092	0.0169441	1.41e-06	14306	0.00161494	23.1375	genus Lactobacillus id.1837	ebi-a-GCST90017030		-0.0178	0.0268	0.507	104247	3011	finn-b-O15_MEMBR_PREMAT_RUPT
1540	rs6092149	A	T	-0.0801344	0.017149	3.29e-06	14306	0.00152398	21.8323	genus Lactobacillus id.1837	ebi-a-GCST90017030		0.0673	0.0272	0.0131999	104247	3011	finn-b-O15_MEMBR_PREMAT_RUPT
1541	rs62314653	C	A	0.187692	0.0394585	2.24e-06	14306	0.00157909	22.623	genus Lactobacillus id.1837	ebi-a-GCST90017030		0.1018	0.0569	0.07358	104247	3011	finn-b-O15_MEMBR_PREMAT_RUPT
1542	rs7399658	G	A	-0.107134	0.0221883	3.12e-06	14306	0.00162698	23.3102	genus Lactobacillus id.1837	ebi-a-GCST90017030		-0.0433	0.0349	0.2148	104247	3011	finn-b-O15_MEMBR_PREMAT_RUPT
1543	rs75127669	C	A	0.139784	0.0310414	6.83e-06	14306	0.00141546	20.2755	genus Lactobacillus id.1837	ebi-a-GCST90017030		0.0017	0.0511	0.9739	104247	3011	finn-b-O15_MEMBR_PREMAT_RUPT
1544	rs768253	T	G	-0.079195	0.0171791	4.25e-06	14306	0.00148331	21.2488	genus Lactobacillus id.1837	ebi-a-GCST90017030		0.0151	0.0269	0.575	104247	3011	finn-b-O15_MEMBR_PREMAT_RUPT
1545	rs77478751	A	G	-0.219886	0.0475759	7.33e-06	14306	0.00149092	21.358	genus Lactobacillus id.1837	ebi-a-GCST90017030		-0.0375	0.042	0.3728	104247	3011	finn-b-O15_MEMBR_PREMAT_RUPT
1546	rs921925	A	C	0.0985077	0.0203229	9.72e-07	14306	0.0016396	23.4914	genus Lactobacillus id.1837	ebi-a-GCST90017030		-0.0043	0.0327	0.8951	104247	3011	finn-b-O15_MEMBR_PREMAT_RUPT
1547	rs10417872	G	T	-0.118306	0.024522	1.29e-06	14306	0.00162434	23.2724	genus Lactococcus id.1851	ebi-a-GCST90017031		0.0019	0.0295	0.9499	104247	3011	finn-b-O15_MEMBR_PREMAT_RUPT
1548	rs123059	C	T	0.13671	0.0274694	1.27e-06	14306	0.00172835	24.7652	genus Lactococcus id.1851	ebi-a-GCST90017031		0.0689	0.0325	0.03437	104247	3011	finn-b-O15_MEMBR_PREMAT_RUPT
1549	rs12621813	G	A	0.108423	0.0239978	6.61e-06	14306	0.00142483	20.4098	genus Lactococcus id.1851	ebi-a-GCST90017031		0.0539	0.0303	0.0747808	104247	3011	finn-b-O15_MEMBR_PREMAT_RUPT
1550	rs17168302	G	A	0.191857	0.0424761	6.29e-06	14306	0.00142406	20.3988	genus Lactococcus id.1851	ebi-a-GCST90017031		0.0257	0.0432	0.5524	104247	3011	finn-b-O15_MEMBR_PREMAT_RUPT
1551	rs2293361	C	T	-0.199221	0.0430969	1.4e-06	14306	0.00149146	21.3657	genus Lactococcus id.1851	ebi-a-GCST90017031		0.0536	0.0593	0.3658	104247	3011	finn-b-O15_MEMBR_PREMAT_RUPT
1552	rs34757988	G	C	0.122294	0.0228976	8.95e-08	14306	0.00198997	28.5213	genus Lactococcus id.1851	ebi-a-GCST90017031		0.0011	0.0275	0.9692	104247	3011	finn-b-O15_MEMBR_PREMAT_RUPT
1553	rs4766997	C	T	0.114599	0.023839	2.06e-06	14306	0.00161275	23.106	genus Lactococcus id.1851	ebi-a-GCST90017031		0.0078	0.027	0.7728	104247	3011	finn-b-O15_MEMBR_PREMAT_RUPT
1554	rs55910161	C	T	0.146426	0.0307367	2.36e-06	14306	0.00158385	22.6914	genus Lactococcus id.1851	ebi-a-GCST90017031		0.0058	0.0428	0.8922	104247	3011	finn-b-O15_MEMBR_PREMAT_RUPT
1555	rs6674304	C	T	0.200758	0.0442121	6.18e-06	14306	0.0014392	20.6159	genus Lactococcus id.1851	ebi-a-GCST90017031		0.0764	0.07	0.2746	104247	3011	finn-b-O15_MEMBR_PREMAT_RUPT
1556	rs757872	C	G	-0.140799	0.027582	4.37e-07	14306	0.00181819	26.0548	genus Lactococcus id.1851	ebi-a-GCST90017031		0.0141	0.0358	0.694201	104247	3011	finn-b-O15_MEMBR_PREMAT_RUPT
1557	rs7992246	C	T	-0.104232	0.0230786	4.45e-06	14306	0.00142379	20.3949	genus Lactococcus id.1851	ebi-a-GCST90017031		0.037	0.0274	0.1775	104247	3011	finn-b-O15_MEMBR_PREMAT_RUPT
1558	rs11620597	T	C	0.119479	0.0271688	7.8e-06	14306	0.00135001	19.3367	genus Marvinbryantia id.2005	ebi-a-GCST90017032		0.1046	0.0873	0.2307	104247	3011	finn-b-O15_MEMBR_PREMAT_RUPT
1559	rs11645029	G	C	-0.060618	0.0131551	4.15e-06	14306	0.00148201	21.2302	genus Marvinbryantia id.2005	ebi-a-GCST90017032		0.02	0.0268	0.4571	104247	3011	finn-b-O15_MEMBR_PREMAT_RUPT
1560	rs1187983	C	T	-0.0935456	0.0193174	2.02e-06	14306	0.00163651	23.4471	genus Marvinbryantia id.2005	ebi-a-GCST90017032		0.0425	0.0441	0.3346	104247	3011	finn-b-O15_MEMBR_PREMAT_RUPT
1561	rs146541147	G	A	0.118845	0.0268423	6.86e-06	14306	0.00136839	19.6003	genus Marvinbryantia id.2005	ebi-a-GCST90017032		-0.0928	0.075	0.2159	104247	3011	finn-b-O15_MEMBR_PREMAT_RUPT
1562	rs2724813	G	A	0.0840769	0.0167551	6.28e-07	14306	0.00175702	25.1767	genus Marvinbryantia id.2005	ebi-a-GCST90017032		-0.0301	0.0315	0.3391	104247	3011	finn-b-O15_MEMBR_PREMAT_RUPT
1563	rs2842896	C	T	-0.0649396	0.0131146	7.25e-07	14306	0.00171099	24.5159	genus Marvinbryantia id.2005	ebi-a-GCST90017032		-0.0245	0.0273	0.3686	104247	3011	finn-b-O15_MEMBR_PREMAT_RUPT
1564	rs2863363	G	A	-0.0634861	0.0136323	3.11e-06	14306	0.00151371	21.6849	genus Marvinbryantia id.2005	ebi-a-GCST90017032		0.0474	0.0312	0.1291	104247	3011	finn-b-O15_MEMBR_PREMAT_RUPT
1565	rs3125832	A	C	0.0679323	0.015012	5.03e-06	14306	0.00142934	20.4746	genus Marvinbryantia id.2005	ebi-a-GCST90017032		-0.0436	0.0321	0.1745	104247	3011	finn-b-O15_MEMBR_PREMAT_RUPT
1566	rs61884471	G	A	0.124426	0.0248431	1.01e-06	14306	0.00175038	25.0813	genus Marvinbryantia id.2005	ebi-a-GCST90017032		-0.0318	0.0433	0.4624	104247	3011	finn-b-O15_MEMBR_PREMAT_RUPT
1567	rs72948274	A	C	-0.126354	0.0272212	3.26e-06	14306	0.0015038	21.5428	genus Marvinbryantia id.2005	ebi-a-GCST90017032		0.0603	0.0545	0.2683	104247	3011	finn-b-O15_MEMBR_PREMAT_RUPT
1568	rs8006832	G	T	-0.0952415	0.0216699	6.58e-06	14306	0.00134845	19.3143	genus Marvinbryantia id.2005	ebi-a-GCST90017032		0.0299	0.0469	0.524499	104247	3011	finn-b-O15_MEMBR_PREMAT_RUPT
1569	rs10202904	G	T	0.112811	0.0239106	3.09e-06	14306	0.00155356	22.2567	genus Methanobrevibacter id.123	ebi-a-GCST90017033		0.0096	0.0272	0.724201	104247	3011	finn-b-O15_MEMBR_PREMAT_RUPT
1570	rs11018665	A	T	0.113013	0.0254343	7.03e-06	14306	0.00137816	19.7404	genus Methanobrevibacter id.123	ebi-a-GCST90017033		0.0359	0.0312	0.2497	104247	3011	finn-b-O15_MEMBR_PREMAT_RUPT
1571	rs1334944	T	C	0.115197	0.0255492	7.61e-06	14306	0.00141903	20.3267	genus Methanobrevibacter id.123	ebi-a-GCST90017033		0.009	0.0296	0.759899	104247	3011	finn-b-O15_MEMBR_PREMAT_RUPT
1572	rs4779844	C	G	-0.109639	0.0247979	9.28e-06	14306	0.00136455	19.5452	genus Methanobrevibacter id.123	ebi-a-GCST90017033		0.0146	0.0282	0.6053	104247	3011	finn-b-O15_MEMBR_PREMAT_RUPT
1573	rs4802933	G	A	0.135628	0.0308139	9.74e-06	14306	0.00135238	19.3707	genus Methanobrevibacter id.123	ebi-a-GCST90017033		-0.02	0.0317	0.528	104247	3011	finn-b-O15_MEMBR_PREMAT_RUPT
1574	rs6776814	T	C	-0.188956	0.0419905	8.05e-06	14306	0.00141347	20.2469	genus Methanobrevibacter id.123	ebi-a-GCST90017033		-0.1228	0.0937	0.1899	104247	3011	finn-b-O15_MEMBR_PREMAT_RUPT
1575	rs76029318	T	C	0.222849	0.0454319	1.08e-06	14306	0.001679	24.0569	genus Methanobrevibacter id.123	ebi-a-GCST90017033		-0.114	0.0551	0.0384804	104247	3011	finn-b-O15_MEMBR_PREMAT_RUPT
1576	rs894996	C	A	0.214213	0.0456045	3.82e-06	14306	0.00153989	22.0605	genus Methanobrevibacter id.123	ebi-a-GCST90017033		-0.0565	0.0525	0.2826	104247	3011	finn-b-O15_MEMBR_PREMAT_RUPT
1577	rs10093869	A	G	-0.0577795	0.0125389	3.67e-06	14306	0.00148206	21.2309	genus Odoribacter id.952	ebi-a-GCST90017034		0.0171	0.0271	0.5285	104247	3011	finn-b-O15_MEMBR_PREMAT_RUPT
1578	rs10423795	T	C	-0.0550695	0.0121164	6.58e-06	14306	0.00144188	20.6545	genus Odoribacter id.952	ebi-a-GCST90017034		0.0156	0.0276	0.5722	104247	3011	finn-b-O15_MEMBR_PREMAT_RUPT
1579	rs16918425	A	T	0.0999781	0.0223785	8.85e-06	14306	0.00139323	19.9566	genus Odoribacter id.952	ebi-a-GCST90017034		-0.0522	0.0627	0.4049	104247	3011	finn-b-O15_MEMBR_PREMAT_RUPT
1580	rs28417404	A	G	-0.0726896	0.0161372	3.68e-06	14306	0.0014163	20.2875	genus Odoribacter id.952	ebi-a-GCST90017034		-0.0253	0.0454	0.5781	104247	3011	finn-b-O15_MEMBR_PREMAT_RUPT
1581	rs4793970	A	G	-0.0576329	0.0129154	6.03e-06	14306	0.00138996	19.9097	genus Odoribacter id.952	ebi-a-GCST90017034		0.0445	0.0279	0.1112	104247	3011	finn-b-O15_MEMBR_PREMAT_RUPT
1582	rs503751	C	G	0.0618294	0.0118887	2.08e-07	14306	0.00188705	27.0434	genus Odoribacter id.952	ebi-a-GCST90017034		-0.039	0.0267	0.1441	104247	3011	finn-b-O15_MEMBR_PREMAT_RUPT
1583	rs6856150	A	G	-0.0881922	0.0194146	6.06e-06	14306	0.00144032	20.6321	genus Odoribacter id.952	ebi-a-GCST90017034		0.0053	0.0408	0.8969	104247	3011	finn-b-O15_MEMBR_PREMAT_RUPT
1584	rs74553962	T	G	0.121449	0.0264106	9.49e-06	14306	0.00147595	21.1432	genus Odoribacter id.952	ebi-a-GCST90017034		0.0921	0.0509	0.0706106	104247	3011	finn-b-O15_MEMBR_PREMAT_RUPT
1585	rs77779484	G	A	-0.133489	0.0268526	6.56e-07	14306	0.00172445	24.7091	genus Odoribacter id.952	ebi-a-GCST90017034		-0.019	0.0562	0.735301	104247	3011	finn-b-O15_MEMBR_PREMAT_RUPT
1586	rs1035588	A	G	-0.108148	0.0236848	4.86e-06	14306	0.00145528	20.8467	genus Olsenella id.822	ebi-a-GCST90017035		0.0118	0.0276	0.669599	104247	3011	finn-b-O15_MEMBR_PREMAT_RUPT
1587	rs17148768	G	A	0.140434	0.0295602	2.2e-06	14306	0.00157517	22.5668	genus Olsenella id.822	ebi-a-GCST90017035		0.0669	0.0359	0.0621699	104247	3011	finn-b-O15_MEMBR_PREMAT_RUPT
1588	rs2759329	A	G	0.111131	0.0237218	3.43e-06	14306	0.00153176	21.9439	genus Olsenella id.822	ebi-a-GCST90017035		0.0109	0.0277	0.6937	104247	3011	finn-b-O15_MEMBR_PREMAT_RUPT
1589	rs35225860	A	G	-0.223604	0.0482391	3.87e-06	14306	0.00149965	21.4833	genus Olsenella id.822	ebi-a-GCST90017035		0.0152	0.0694	0.8263	104247	3011	finn-b-O15_MEMBR_PREMAT_RUPT
1590	rs61090148	A	G	-0.104783	0.0231343	6.44e-06	14306	0.00143195	20.512	genus Olsenella id.822	ebi-a-GCST90017035		0.0136	0.0271	0.6147	104247	3011	finn-b-O15_MEMBR_PREMAT_RUPT
1591	rs62112538	C	T	-0.19943	0.0407033	1.19e-06	14306	0.00167523	24.0028	genus Olsenella id.822	ebi-a-GCST90017035		0.0501	0.0428	0.2422	104247	3011	finn-b-O15_MEMBR_PREMAT_RUPT
1592	rs72691585	C	A	-0.249079	0.0520814	2.95e-06	14306	0.00159624	22.8691	genus Olsenella id.822	ebi-a-GCST90017035		-0.025	0.0391	0.5226	104247	3011	finn-b-O15_MEMBR_PREMAT_RUPT
1593	rs7540303	C	T	0.108044	0.023638	5.32e-06	14306	0.00145824	20.8891	genus Olsenella id.822	ebi-a-GCST90017035		0.0245	0.0275	0.374	104247	3011	finn-b-O15_MEMBR_PREMAT_RUPT
1594	rs8066522	A	G	0.106529	0.0240379	9.7e-06	14306	0.00137097	19.6373	genus Olsenella id.822	ebi-a-GCST90017035		-0.0078	0.0285	0.7854	104247	3011	finn-b-O15_MEMBR_PREMAT_RUPT
1595	rs9460691	C	A	0.119966	0.0268645	7.28e-06	14306	0.00139199	19.9388	genus Olsenella id.822	ebi-a-GCST90017035		0.0184	0.0342	0.5913	104247	3011	finn-b-O15_MEMBR_PREMAT_RUPT
1596	rs11627628	T	C	0.143961	0.0290223	1.01e-06	14306	0.00171696	24.6017	genus Oscillibacter id.2063	ebi-a-GCST90017036		-0.0106	0.0504	0.833	104247	3011	finn-b-O15_MEMBR_PREMAT_RUPT
1597	rs11990279	T	C	-0.0824934	0.0180457	4.94e-06	14306	0.00145861	20.8944	genus Oscillibacter id.2063	ebi-a-GCST90017036		-0.0807	0.0382	0.0347496	104247	3011	finn-b-O15_MEMBR_PREMAT_RUPT
1598	rs12417956	C	G	0.0785431	0.0174075	6.03e-06	14306	0.00142104	20.3555	genus Oscillibacter id.2063	ebi-a-GCST90017036		0.0481	0.0298	0.1064	104247	3011	finn-b-O15_MEMBR_PREMAT_RUPT
1599	rs12649930	T	G	0.121589	0.0259612	4.09e-06	14306	0.00153093	21.932	genus Oscillibacter id.2063	ebi-a-GCST90017036		0.0173	0.0442	0.6959	104247	3011	finn-b-O15_MEMBR_PREMAT_RUPT
1600	rs133832	A	C	-0.0795527	0.0162411	1.15e-06	14306	0.0016743	23.9893	genus Oscillibacter id.2063	ebi-a-GCST90017036		-0.0347	0.0298	0.2441	104247	3011	finn-b-O15_MEMBR_PREMAT_RUPT
1601	rs137917150	T	A	-0.174992	0.0388394	4.62e-06	14306	0.00141696	20.2969	genus Oscillibacter id.2063	ebi-a-GCST90017036		-0.0016	0.0462	0.972	104247	3011	finn-b-O15_MEMBR_PREMAT_RUPT
1602	rs16866406	A	G	0.0988765	0.0208795	3.08e-06	14306	0.00156512	22.4226	genus Oscillibacter id.2063	ebi-a-GCST90017036		-0.0071	0.0373	0.8485	104247	3011	finn-b-O15_MEMBR_PREMAT_RUPT
1603	rs16934185	A	G	-0.129568	0.028157	4.38e-06	14306	0.00147796	21.172	genus Oscillibacter id.2063	ebi-a-GCST90017036		0.0697	0.044	0.1137	104247	3011	finn-b-O15_MEMBR_PREMAT_RUPT
1604	rs234108	A	G	0.0749553	0.0152632	9.16e-07	14306	0.00168292	24.1131	genus Oscillibacter id.2063	ebi-a-GCST90017036		0.0351	0.0272	0.1965	104247	3011	finn-b-O15_MEMBR_PREMAT_RUPT
1605	rs36095275	C	T	-0.0752368	0.0156861	1.4e-06	14306	0.00160552	23.0022	genus Oscillibacter id.2063	ebi-a-GCST90017036		-0.0289	0.0272	0.288	104247	3011	finn-b-O15_MEMBR_PREMAT_RUPT
1606	rs4506202	G	A	0.0711323	0.0152261	3.21e-06	14306	0.00152327	21.8221	genus Oscillibacter id.2063	ebi-a-GCST90017036		-0.0175	0.0269	0.514801	104247	3011	finn-b-O15_MEMBR_PREMAT_RUPT
1607	rs61883564	A	G	-0.101351	0.0221016	3.39e-06	14306	0.00146775	21.0256	genus Oscillibacter id.2063	ebi-a-GCST90017036		-0.0003	0.0387	0.9929	104247	3011	finn-b-O15_MEMBR_PREMAT_RUPT
1608	rs6901560	C	G	0.0855032	0.018693	6.21e-06	14306	0.00146034	20.9192	genus Oscillibacter id.2063	ebi-a-GCST90017036		-0.0368	0.0343	0.2829	104247	3011	finn-b-O15_MEMBR_PREMAT_RUPT
1609	rs75453768	G	T	0.12212	0.0268629	5.35e-06	14306	0.00144252	20.6637	genus Oscillibacter id.2063	ebi-a-GCST90017036		-0.0271	0.0453	0.549	104247	3011	finn-b-O15_MEMBR_PREMAT_RUPT
1610	rs761240	G	T	0.17664	0.0388812	2.04e-06	14306	0.00144064	20.6366	genus Oscillibacter id.2063	ebi-a-GCST90017036		-0.0199	0.0617	0.7474	104247	3011	finn-b-O15_MEMBR_PREMAT_RUPT
1611	rs9393920	G	A	0.0744662	0.0151081	9.92e-07	14306	0.00169529	24.2906	genus Oscillibacter id.2063	ebi-a-GCST90017036		0.001	0.0282	0.973	104247	3011	finn-b-O15_MEMBR_PREMAT_RUPT
1612	rs12206468	G	A	-0.133016	0.0269733	1.04e-06	14306	0.00169701	24.3153	genus Oscillospira id.2064	ebi-a-GCST90017037		-0.002	0.0503	0.969	104247	3011	finn-b-O15_MEMBR_PREMAT_RUPT
1613	rs12925026	T	C	0.13559	0.030678	9.31e-06	14306	0.00136361	19.5317	genus Oscillospira id.2064	ebi-a-GCST90017037		-0.0016	0.0578	0.978	104247	3011	finn-b-O15_MEMBR_PREMAT_RUPT
1614	rs1954532	C	T	0.0826246	0.0175252	2.27e-06	14306	0.00155132	22.2245	genus Oscillospira id.2064	ebi-a-GCST90017037		0.0619	0.0336	0.0654199	104247	3011	finn-b-O15_MEMBR_PREMAT_RUPT
1615	rs28889936	A	C	0.114051	0.0252838	3.37e-06	14306	0.00142029	20.3448	genus Oscillospira id.2064	ebi-a-GCST90017037		0.0055	0.0452	0.9032	104247	3011	finn-b-O15_MEMBR_PREMAT_RUPT
1616	rs62422654	C	T	0.0898456	0.0198088	6.47e-06	14306	0.00143594	20.5692	genus Oscillospira id.2064	ebi-a-GCST90017037		0.0308	0.0328	0.3472	104247	3011	finn-b-O15_MEMBR_PREMAT_RUPT
1617	rs72866977	A	C	-0.130569	0.0281674	5.63e-06	14306	0.00149974	21.4845	genus Oscillospira id.2064	ebi-a-GCST90017037		0.0961	0.0499	0.0541502	104247	3011	finn-b-O15_MEMBR_PREMAT_RUPT
1618	rs73038677	T	A	-0.08321	0.0168666	1.09e-06	14306	0.0016984	24.3352	genus Oscillospira id.2064	ebi-a-GCST90017037		0.0029	0.0387	0.9411	104247	3011	finn-b-O15_MEMBR_PREMAT_RUPT
1619	rs751183	C	T	0.0774322	0.0172216	6.85e-06	14306	0.00141112	20.2132	genus Oscillospira id.2064	ebi-a-GCST90017037		0.0267	0.0345	0.439	104247	3011	finn-b-O15_MEMBR_PREMAT_RUPT
1620	rs8076323	A	G	0.0715392	0.0156539	5.61e-06	14306	0.00145778	20.8825	genus Oscillospira id.2064	ebi-a-GCST90017037		-0.0122	0.0284	0.667999	104247	3011	finn-b-O15_MEMBR_PREMAT_RUPT
1621	rs10464997	G	A	0.137691	0.0294804	3.3e-06	14306	0.00152253	21.8114	genus Oxalobacter id.2978	ebi-a-GCST90017038		0.0927	0.0344	0.00704807	104247	3011	finn-b-O15_MEMBR_PREMAT_RUPT
1622	rs11108500	A	G	-0.199099	0.0427327	3.74e-06	14306	0.0015151	21.7048	genus Oxalobacter id.2978	ebi-a-GCST90017038		0.1016	0.0478	0.0336798	104247	3011	finn-b-O15_MEMBR_PREMAT_RUPT
1623	rs111966731	T	C	0.213114	0.047162	7.3e-06	14306	0.00142529	20.4164	genus Oxalobacter id.2978	ebi-a-GCST90017038		0.0039	0.0474	0.9343	104247	3011	finn-b-O15_MEMBR_PREMAT_RUPT
1624	rs12002250	A	C	0.217122	0.0466317	1.42e-06	14306	0.00151311	21.6763	genus Oxalobacter id.2978	ebi-a-GCST90017038		0.0404	0.0668	0.5452	104247	3011	finn-b-O15_MEMBR_PREMAT_RUPT
1625	rs1569853	T	C	-0.138078	0.0296981	3.65e-06	14306	0.00150875	21.6138	genus Oxalobacter id.2978	ebi-a-GCST90017038		-0.0128	0.0409	0.7539	104247	3011	finn-b-O15_MEMBR_PREMAT_RUPT
1626	rs36057338	G	T	0.207847	0.0421439	8.8e-07	14306	0.00169731	24.3197	genus Oxalobacter id.2978	ebi-a-GCST90017038		0.0579	0.0738	0.4327	104247	3011	finn-b-O15_MEMBR_PREMAT_RUPT
1627	rs3862635	C	T	-0.172142	0.0394026	9.19e-06	14306	0.00133238	19.0837	genus Oxalobacter id.2978	ebi-a-GCST90017038		-0.0907	0.0463	0.0502805	104247	3011	finn-b-O15_MEMBR_PREMAT_RUPT
1628	rs4428215	G	A	0.130293	0.0242237	7.51e-08	14306	0.00201821	28.9268	genus Oxalobacter id.2978	ebi-a-GCST90017038		-0.0415	0.0307	0.1769	104247	3011	finn-b-O15_MEMBR_PREMAT_RUPT
1629	rs6000536	C	T	-0.130992	0.0253804	2.06e-07	14306	0.00185852	26.6337	genus Oxalobacter id.2978	ebi-a-GCST90017038		0.0658	0.0356	0.0645298	104247	3011	finn-b-O15_MEMBR_PREMAT_RUPT
1630	rs6071435	T	A	-0.105512	0.021489	1.07e-06	14306	0.00168237	24.1052	genus Oxalobacter id.2978	ebi-a-GCST90017038		0.0247	0.0275	0.3698	104247	3011	finn-b-O15_MEMBR_PREMAT_RUPT
1631	rs6993398	G	A	0.127217	0.0278855	7.13e-06	14306	0.00145273	20.81	genus Oxalobacter id.2978	ebi-a-GCST90017038		0.0631	0.0345	0.0678797	104247	3011	finn-b-O15_MEMBR_PREMAT_RUPT
1632	rs736744	T	C	-0.117882	0.0211262	2.57e-08	14306	0.00217165	31.1309	genus Oxalobacter id.2978	ebi-a-GCST90017038		0.0414	0.0269	0.1244	104247	3011	finn-b-O15_MEMBR_PREMAT_RUPT
1633	rs115602804	G	A	0.10308	0.0222736	1.93e-06	14306	0.00149486	21.4145	genus Parabacteroides id.954	ebi-a-GCST90017039		0.0156	0.0433	0.718899	104247	3011	finn-b-O15_MEMBR_PREMAT_RUPT
1634	rs11965579	G	C	0.162824	0.0381863	8.87e-06	14306	0.00126926	18.1786	genus Parabacteroides id.954	ebi-a-GCST90017039		0.0317	0.0909	0.7278	104247	3011	finn-b-O15_MEMBR_PREMAT_RUPT
1635	rs3860755	G	C	0.0558784	0.0116625	1.71e-06	14306	0.0016021	22.9532	genus Parabacteroides id.954	ebi-a-GCST90017039		0.0244	0.0287	0.3948	104247	3011	finn-b-O15_MEMBR_PREMAT_RUPT
1636	rs4236095	A	G	-0.0761961	0.0157042	1.93e-06	14306	0.00164286	23.5382	genus Parabacteroides id.954	ebi-a-GCST90017039		-0.0318	0.0443	0.4734	104247	3011	finn-b-O15_MEMBR_PREMAT_RUPT
1637	rs60884758	C	T	-0.0702667	0.0142249	5.71e-07	14306	0.00170272	24.3972	genus Parabacteroides id.954	ebi-a-GCST90017039		-0.0403	0.0349	0.2482	104247	3011	finn-b-O15_MEMBR_PREMAT_RUPT
1638	rs6657302	T	C	-0.10452	0.0225521	9.76e-06	14306	0.00149918	21.4765	genus Parabacteroides id.954	ebi-a-GCST90017039		0.0868	0.0549	0.114	104247	3011	finn-b-O15_MEMBR_PREMAT_RUPT
1639	rs72893646	A	T	-0.0715594	0.0156668	8.83e-06	14306	0.0014562	20.8599	genus Parabacteroides id.954	ebi-a-GCST90017039		-0.0304	0.0398	0.4446	104247	3011	finn-b-O15_MEMBR_PREMAT_RUPT
1640	rs7298818	C	T	0.0888832	0.0200902	8.54e-06	14306	0.00136634	19.5709	genus Parabacteroides id.954	ebi-a-GCST90017039		-0.0067	0.044	0.8792	104247	3011	finn-b-O15_MEMBR_PREMAT_RUPT
1641	rs10842464	C	T	0.0758215	0.0172568	6.6e-06	14306	0.0013476	19.3021	genus Paraprevotella id.962	ebi-a-GCST90017040		0.0067	0.0291	0.8173	104247	3011	finn-b-O15_MEMBR_PREMAT_RUPT
1642	rs140997932	T	C	-0.162376	0.0354178	2.11e-06	14306	0.00146705	21.0155	genus Paraprevotella id.962	ebi-a-GCST90017040		0.0894	0.0597	0.1347	104247	3011	finn-b-O15_MEMBR_PREMAT_RUPT
1643	rs145020347	A	G	-0.12465	0.0262323	4.03e-06	14306	0.00157583	22.5762	genus Paraprevotella id.962	ebi-a-GCST90017040		0.0062	0.0379	0.8704	104247	3011	finn-b-O15_MEMBR_PREMAT_RUPT
1644	rs17109926	A	G	-0.0988335	0.0216172	6.75e-06	14306	0.00145901	20.9001	genus Paraprevotella id.962	ebi-a-GCST90017040		0.0272	0.0299	0.3627	104247	3011	finn-b-O15_MEMBR_PREMAT_RUPT
1645	rs17785622	A	G	0.248065	0.0524304	1.93e-06	14306	0.00156231	22.3823	genus Paraprevotella id.962	ebi-a-GCST90017040		-0.0145	0.07	0.8354	104247	3011	finn-b-O15_MEMBR_PREMAT_RUPT
1646	rs2081023	A	G	-0.122561	0.0236507	2.64e-07	14306	0.00187363	26.8507	genus Paraprevotella id.962	ebi-a-GCST90017040		0.0295	0.0383	0.441	104247	3011	finn-b-O15_MEMBR_PREMAT_RUPT
1647	rs3008582	T	C	0.10572	0.0227246	4.36e-06	14306	0.00151059	21.6402	genus Paraprevotella id.962	ebi-a-GCST90017040		0.0479	0.034	0.1588	104247	3011	finn-b-O15_MEMBR_PREMAT_RUPT
1648	rs3801748	G	A	0.0779721	0.0171691	5.2e-06	14306	0.00143959	20.6216	genus Paraprevotella id.962	ebi-a-GCST90017040		-0.0242	0.0278	0.3833	104247	3011	finn-b-O15_MEMBR_PREMAT_RUPT
1649	rs4756632	G	T	-0.138905	0.0289897	3.82e-06	14306	0.00160226	22.9555	genus Paraprevotella id.962	ebi-a-GCST90017040		0.03	0.0398	0.4504	104247	3011	finn-b-O15_MEMBR_PREMAT_RUPT
1650	rs4767113	C	T	0.0882466	0.018382	2.14e-06	14306	0.0016084	23.0436	genus Paraprevotella id.962	ebi-a-GCST90017040		0.0276	0.0284	0.3315	104247	3011	finn-b-O15_MEMBR_PREMAT_RUPT
1651	rs7240324	T	G	-0.10229	0.0226948	5.96e-06	14306	0.00141801	20.312	genus Paraprevotella id.962	ebi-a-GCST90017040		-0.0237	0.0311	0.4457	104247	3011	finn-b-O15_MEMBR_PREMAT_RUPT
1652	rs9602779	A	C	-0.106692	0.0220264	6.93e-07	14306	0.00163737	23.4593	genus Paraprevotella id.962	ebi-a-GCST90017040		0.0382	0.0312	0.2213	104247	3011	finn-b-O15_MEMBR_PREMAT_RUPT
1653	rs9900242	A	G	-0.0852967	0.0175212	1.14e-06	14306	0.00165386	23.6961	genus Paraprevotella id.962	ebi-a-GCST90017040		-0.0498	0.028	0.0759102	104247	3011	finn-b-O15_MEMBR_PREMAT_RUPT
1654	rs10899911	A	G	-0.0717102	0.0148151	1.15e-06	14306	0.00163502	23.4257	genus Parasutterella id.2892	ebi-a-GCST90017041		-0.042	0.0318	0.1863	104247	3011	finn-b-O15_MEMBR_PREMAT_RUPT
1655	rs11715853	G	A	-0.0662952	0.0146114	6.23e-06	14306	0.00143694	20.5835	genus Parasutterella id.2892	ebi-a-GCST90017041		0.0129	0.0293	0.6586	104247	3011	finn-b-O15_MEMBR_PREMAT_RUPT
1656	rs1403396	A	T	-0.0756729	0.0159035	2.76e-06	14306	0.00158012	22.6378	genus Parasutterella id.2892	ebi-a-GCST90017041		-0.0238	0.0325	0.4636	104247	3011	finn-b-O15_MEMBR_PREMAT_RUPT
1657	rs2090816	C	A	-0.0840967	0.0177315	2.9e-06	14306	0.00156988	22.4909	genus Parasutterella id.2892	ebi-a-GCST90017041		0.0268	0.0348	0.4417	104247	3011	finn-b-O15_MEMBR_PREMAT_RUPT
1658	rs35055552	T	C	0.109554	0.0235433	3.35e-06	14306	0.00151129	21.6502	genus Parasutterella id.2892	ebi-a-GCST90017041		-0.0614	0.0388	0.1137	104247	3011	finn-b-O15_MEMBR_PREMAT_RUPT
1659	rs35414597	T	A	-0.0684946	0.0142143	1.51e-06	14306	0.00162046	23.2167	genus Parasutterella id.2892	ebi-a-GCST90017041		0.0017	0.0294	0.953	104247	3011	finn-b-O15_MEMBR_PREMAT_RUPT
1660	rs55877868	A	C	-0.104458	0.0228089	2.87e-06	14306	0.00146393	20.9708	genus Parasutterella id.2892	ebi-a-GCST90017041		-0.054	0.0445	0.2244	104247	3011	finn-b-O15_MEMBR_PREMAT_RUPT
1661	rs62273907	A	G	0.229468	0.0502262	5.88e-06	14306	0.00145691	20.87	genus Parasutterella id.2892	ebi-a-GCST90017041		-0.0138	0.0532	0.7952	104247	3011	finn-b-O15_MEMBR_PREMAT_RUPT
1662	rs6809952	G	A	-0.0684957	0.0150892	8.13e-06	14306	0.0014383	20.6031	genus Parasutterella id.2892	ebi-a-GCST90017041		-0.0239	0.0305	0.433	104247	3011	finn-b-O15_MEMBR_PREMAT_RUPT
1663	rs6828768	C	T	0.0636852	0.0132645	1.78e-06	14306	0.00160871	23.0481	genus Parasutterella id.2892	ebi-a-GCST90017041		-0.009	0.0268	0.735501	104247	3011	finn-b-O15_MEMBR_PREMAT_RUPT
1664	rs7303158	C	T	0.0646859	0.0134256	1.33e-06	14306	0.00162005	23.2109	genus Parasutterella id.2892	ebi-a-GCST90017041		-0.0395	0.0269	0.1417	104247	3011	finn-b-O15_MEMBR_PREMAT_RUPT
1665	rs7311004	C	T	0.0617522	0.0136438	5.92e-06	14306	0.00142986	20.4821	genus Parasutterella id.2892	ebi-a-GCST90017041		-0.0007	0.0269	0.9784	104247	3011	finn-b-O15_MEMBR_PREMAT_RUPT
1666	rs7572229	A	G	-0.066273	0.0132736	6.32e-07	14306	0.00173949	24.925	genus Parasutterella id.2892	ebi-a-GCST90017041		-0.0131	0.0267	0.6242	104247	3011	finn-b-O15_MEMBR_PREMAT_RUPT
1667	rs78383039	T	C	-0.146315	0.0297119	1.57e-06	14306	0.00169224	24.2469	genus Parasutterella id.2892	ebi-a-GCST90017041		0.013	0.0678	0.8481	104247	3011	finn-b-O15_MEMBR_PREMAT_RUPT
1668	rs8039785	G	T	-0.0618345	0.0133	3.62e-06	14306	0.00150864	21.6121	genus Parasutterella id.2892	ebi-a-GCST90017041		-0.0221	0.0266	0.4059	104247	3011	finn-b-O15_MEMBR_PREMAT_RUPT
1669	rs823424	G	A	-0.0713448	0.0156958	4.95e-06	14306	0.00144216	20.6584	genus Parasutterella id.2892	ebi-a-GCST90017041		0.0366	0.0308	0.2348	104247	3011	finn-b-O15_MEMBR_PREMAT_RUPT
1670	rs10031059	C	T	0.121167	0.0225844	1.24e-07	14306	0.00200798	28.78	genus Peptococcus id.2037	ebi-a-GCST90017042		-0.0245	0.0313	0.4333	104247	3011	finn-b-O15_MEMBR_PREMAT_RUPT
1671	rs11001941	G	A	-0.195611	0.0392217	1.33e-06	14306	0.00173565	24.8698	genus Peptococcus id.2037	ebi-a-GCST90017042		0.0283	0.0474	0.5506	104247	3011	finn-b-O15_MEMBR_PREMAT_RUPT
1672	rs11030569	A	T	-0.17402	0.0374133	3.13e-06	14306	0.00150998	21.6314	genus Peptococcus id.2037	ebi-a-GCST90017042		-0.0469	0.0405	0.2462	104247	3011	finn-b-O15_MEMBR_PREMAT_RUPT
1673	rs12069354	C	T	0.16763	0.0379501	9.28e-06	14306	0.00136197	19.5082	genus Peptococcus id.2037	ebi-a-GCST90017042		-0.0179	0.0556	0.7474	104247	3011	finn-b-O15_MEMBR_PREMAT_RUPT
1674	rs2054133	A	G	-0.0895433	0.0188332	2.14e-06	14306	0.00157766	22.6025	genus Peptococcus id.2037	ebi-a-GCST90017042		-0.0054	0.0281	0.8462	104247	3011	finn-b-O15_MEMBR_PREMAT_RUPT
1675	rs34282744	G	C	0.191797	0.0399832	1.84e-06	14306	0.00160588	23.0074	genus Peptococcus id.2037	ebi-a-GCST90017042		-0.0127	0.0489	0.7942	104247	3011	finn-b-O15_MEMBR_PREMAT_RUPT
1676	rs36121075	A	G	-0.14067	0.030628	6.99e-06	14306	0.00147234	21.0914	genus Peptococcus id.2037	ebi-a-GCST90017042		-0.0413	0.0358	0.2478	104247	3011	finn-b-O15_MEMBR_PREMAT_RUPT
1677	rs413827	G	A	0.110229	0.0237523	3.3e-06	14306	0.00150317	21.5338	genus Peptococcus id.2037	ebi-a-GCST90017042		-0.0206	0.0313	0.5106	104247	3011	finn-b-O15_MEMBR_PREMAT_RUPT
1678	rs5770862	T	C	0.162018	0.0356813	3.22e-06	14306	0.00143914	20.6151	genus Peptococcus id.2037	ebi-a-GCST90017042		-0.0664	0.0457	0.1461	104247	3011	finn-b-O15_MEMBR_PREMAT_RUPT
1679	rs6918730	A	G	-0.135311	0.0289742	1.15e-06	14306	0.00152217	21.8063	genus Peptococcus id.2037	ebi-a-GCST90017042		-0.0769	0.0567	0.1748	104247	3011	finn-b-O15_MEMBR_PREMAT_RUPT
1680	rs7033353	G	T	-0.090152	0.018995	2.22e-06	14306	0.00157207	22.5222	genus Peptococcus id.2037	ebi-a-GCST90017042		0.0016	0.0268	0.9536	104247	3011	finn-b-O15_MEMBR_PREMAT_RUPT
1681	rs72850165	T	C	-0.134304	0.0300423	5.74e-06	14306	0.00139504	19.9825	genus Peptococcus id.2037	ebi-a-GCST90017042		-0.0487	0.0505	0.334	104247	3011	finn-b-O15_MEMBR_PREMAT_RUPT
1682	rs74592222	G	A	0.137957	0.0302965	8.55e-06	14306	0.00144729	20.732	genus Peptococcus id.2037	ebi-a-GCST90017042		0.0083	0.0419	0.8427	104247	3011	finn-b-O15_MEMBR_PREMAT_RUPT
1683	rs75754569	C	G	0.181434	0.0319429	1.1e-08	14306	0.00225005	32.2573	genus Peptococcus id.2037	ebi-a-GCST90017042		-0.0443	0.0463	0.3392	104247	3011	finn-b-O15_MEMBR_PREMAT_RUPT
1684	rs7766680	G	C	0.0976832	0.0214155	3.51e-06	14306	0.00145222	20.8028	genus Peptococcus id.2037	ebi-a-GCST90017042		-0.0501	0.0322	0.1193	104247	3011	finn-b-O15_MEMBR_PREMAT_RUPT
1685	rs77681628	C	T	0.200307	0.0387328	2.69e-07	14306	0.00186597	26.7408	genus Peptococcus id.2037	ebi-a-GCST90017042		-0.0167	0.0486	0.730601	104247	3011	finn-b-O15_MEMBR_PREMAT_RUPT
1686	rs11929846	T	C	-0.0697199	0.0157969	8.88e-06	14306	0.00135976	19.4764	genus Phascolarctobacterium id.2168	ebi-a-GCST90017043		-0.0327	0.0325	0.3131	104247	3011	finn-b-O15_MEMBR_PREMAT_RUPT
1687	rs12618201	A	G	0.0641657	0.0138202	3.38e-06	14306	0.00150454	21.5534	genus Phascolarctobacterium id.2168	ebi-a-GCST90017043		-0.0033	0.0268	0.9009	104247	3011	finn-b-O15_MEMBR_PREMAT_RUPT
1688	rs1264476	G	T	-0.0767335	0.0166041	4.3e-06	14306	0.00149064	21.354	genus Phascolarctobacterium id.2168	ebi-a-GCST90017043		0.0344	0.0342	0.3141	104247	3011	finn-b-O15_MEMBR_PREMAT_RUPT
1689	rs56069061	G	A	-0.111306	0.0230694	1.87e-06	14306	0.00162458	23.2758	genus Phascolarctobacterium id.2168	ebi-a-GCST90017043		-0.0038	0.0538	0.9442	104247	3011	finn-b-O15_MEMBR_PREMAT_RUPT
1690	rs56157888	A	C	0.0954864	0.0193976	1.09e-06	14306	0.00169096	24.2285	genus Phascolarctobacterium id.2168	ebi-a-GCST90017043		0.0127	0.0324	0.695401	104247	3011	finn-b-O15_MEMBR_PREMAT_RUPT
1691	rs6427992	C	G	0.0652458	0.0137508	2.09e-06	14306	0.00157126	22.5107	genus Phascolarctobacterium id.2168	ebi-a-GCST90017043		-0.0225	0.0276	0.4153	104247	3011	finn-b-O15_MEMBR_PREMAT_RUPT
1692	rs74540770	G	A	-0.121014	0.0258621	3.6e-06	14306	0.00152813	21.8919	genus Phascolarctobacterium id.2168	ebi-a-GCST90017043		0.0312	0.0494	0.528	104247	3011	finn-b-O15_MEMBR_PREMAT_RUPT
1693	rs75882962	T	C	0.0968661	0.0190575	3.19e-07	14306	0.00180264	25.8316	genus Phascolarctobacterium id.2168	ebi-a-GCST90017043		0.0825	0.0402	0.0403005	104247	3011	finn-b-O15_MEMBR_PREMAT_RUPT
1694	rs76124218	C	G	-0.159361	0.0344532	2.67e-06	14306	0.00149327	21.3916	genus Phascolarctobacterium id.2168	ebi-a-GCST90017043		-0.0064	0.0703	0.9273	104247	3011	finn-b-O15_MEMBR_PREMAT_RUPT
1695	rs7982713	G	A	0.0726921	0.0163201	9.72e-06	14306	0.00138487	19.8366	genus Phascolarctobacterium id.2168	ebi-a-GCST90017043		-0.0065	0.03	0.8283	104247	3011	finn-b-O15_MEMBR_PREMAT_RUPT
1696	rs118038478	A	G	0.205676	0.0468917	7.85e-06	14306	0.00134299	19.236	genus Prevotella7 id.11182	ebi-a-GCST90017044		0.0165	0.0526	0.753199	104247	3011	finn-b-O15_MEMBR_PREMAT_RUPT
1697	rs12124567	A	G	-0.121281	0.0275017	9.49e-06	14306	0.00135756	19.4449	genus Prevotella7 id.11182	ebi-a-GCST90017044		-0.0165	0.0336	0.6223	104247	3011	finn-b-O15_MEMBR_PREMAT_RUPT
1698	rs12195431	T	C	0.196528	0.0442322	8.73e-06	14306	0.00137802	19.7384	genus Prevotella7 id.11182	ebi-a-GCST90017044		-0.0222	0.0454	0.6241	104247	3011	finn-b-O15_MEMBR_PREMAT_RUPT
1699	rs16937247	G	C	0.146098	0.0351529	9.64e-06	14306	0.00120593	17.2705	genus Prevotella7 id.11182	ebi-a-GCST90017044		-0.0344	0.0334	0.3028	104247	3011	finn-b-O15_MEMBR_PREMAT_RUPT
1700	rs2240542	C	T	0.12085	0.0261776	4.84e-06	14306	0.00148754	21.3095	genus Prevotella7 id.11182	ebi-a-GCST90017044		-0.0539	0.0303	0.0758403	104247	3011	finn-b-O15_MEMBR_PREMAT_RUPT
1701	rs2918132	T	C	0.114648	0.0254916	6.42e-06	14306	0.00141191	20.2245	genus Prevotella7 id.11182	ebi-a-GCST90017044		-0.0035	0.0277	0.8984	104247	3011	finn-b-O15_MEMBR_PREMAT_RUPT
1702	rs430270	A	C	0.139155	0.0297055	2.87e-06	14306	0.00153158	21.9413	genus Prevotella7 id.11182	ebi-a-GCST90017044		0.0027	0.0341	0.9359	104247	3011	finn-b-O15_MEMBR_PREMAT_RUPT
1703	rs57404562	C	A	0.155486	0.0316057	6.22e-07	14306	0.00168888	24.1986	genus Prevotella7 id.11182	ebi-a-GCST90017044		-0.015	0.0399	0.7071	104247	3011	finn-b-O15_MEMBR_PREMAT_RUPT
1704	rs79263163	A	C	-0.143982	0.031501	7.51e-06	14306	0.0014582	20.8885	genus Prevotella7 id.11182	ebi-a-GCST90017044		-0.0567	0.0333	0.0880501	104247	3011	finn-b-O15_MEMBR_PREMAT_RUPT
1705	rs9426434	T	C	-0.123657	0.0278514	9.72e-06	14306	0.00137603	19.7098	genus Prevotella7 id.11182	ebi-a-GCST90017044		-0.055	0.0282	0.05118	104247	3011	finn-b-O15_MEMBR_PREMAT_RUPT
1706	rs9608249	A	G	-0.158213	0.0336317	2.07e-06	14306	0.00154453	22.1272	genus Prevotella7 id.11182	ebi-a-GCST90017044		-0.0264	0.0428	0.5383	104247	3011	finn-b-O15_MEMBR_PREMAT_RUPT
1707	rs9959718	G	A	0.133012	0.0275361	1.9e-06	14306	0.00162836	23.3301	genus Prevotella7 id.11182	ebi-a-GCST90017044		0.0379	0.0332	0.2528	104247	3011	finn-b-O15_MEMBR_PREMAT_RUPT
1708	rs10512344	C	G	0.247373	0.0544087	3.19e-06	14306	0.00144286	20.6684	genus Prevotella9 id.11183	ebi-a-GCST90017045		-0.0182	0.0951	0.8483	104247	3011	finn-b-O15_MEMBR_PREMAT_RUPT
1709	rs111509883	T	C	0.171131	0.0347624	1.24e-06	14306	0.00169116	24.2313	genus Prevotella9 id.11183	ebi-a-GCST90017045		0.1057	0.0431	0.01426	104247	3011	finn-b-O15_MEMBR_PREMAT_RUPT
1710	rs11199734	A	T	0.0770209	0.0169462	7e-06	14306	0.00144188	20.6544	genus Prevotella9 id.11183	ebi-a-GCST90017045		0.0572	0.0325	0.0781304	104247	3011	finn-b-O15_MEMBR_PREMAT_RUPT
1711	rs11685699	C	T	-0.141357	0.0295665	2.03e-06	14306	0.00159523	22.8546	genus Prevotella9 id.11183	ebi-a-GCST90017045		0.0692	0.0506	0.1716	104247	3011	finn-b-O15_MEMBR_PREMAT_RUPT
1712	rs117271932	A	G	0.208089	0.0440393	2.82e-06	14306	0.0015582	22.3232	genus Prevotella9 id.11183	ebi-a-GCST90017045		-0.0031	0.0576	0.9577	104247	3011	finn-b-O15_MEMBR_PREMAT_RUPT
1713	rs12648235	T	C	0.0785902	0.0177676	7.39e-06	14306	0.00136574	19.5622	genus Prevotella9 id.11183	ebi-a-GCST90017045		-0.039	0.0318	0.2201	104247	3011	finn-b-O15_MEMBR_PREMAT_RUPT
1714	rs1304512	G	A	0.0761593	0.0165885	5.29e-06	14306	0.00147121	21.0752	genus Prevotella9 id.11183	ebi-a-GCST90017045		-0.0035	0.0301	0.9062	104247	3011	finn-b-O15_MEMBR_PREMAT_RUPT
1715	rs16966465	G	C	0.0743348	0.0165291	9.33e-06	14306	0.00141174	20.2221	genus Prevotella9 id.11183	ebi-a-GCST90017045		-0.0196	0.0342	0.5679	104247	3011	finn-b-O15_MEMBR_PREMAT_RUPT
1716	rs2104588	C	T	-0.105558	0.023773	8.13e-06	14306	0.00137625	19.713	genus Prevotella9 id.11183	ebi-a-GCST90017045		-0.0473	0.0579	0.4139	104247	3011	finn-b-O15_MEMBR_PREMAT_RUPT
1717	rs2495052	A	G	0.0838978	0.0188523	8.97e-06	14306	0.00138246	19.8021	genus Prevotella9 id.11183	ebi-a-GCST90017045		0.02	0.0375	0.5943	104247	3011	finn-b-O15_MEMBR_PREMAT_RUPT
1718	rs2683313	G	A	0.0724576	0.0151603	1.69e-06	14306	0.00159419	22.8398	genus Prevotella9 id.11183	ebi-a-GCST90017045		0.0124	0.0287	0.6654	104247	3011	finn-b-O15_MEMBR_PREMAT_RUPT
1719	rs4968431	G	T	0.0640113	0.0144162	8.58e-06	14306	0.00137624	19.7129	genus Prevotella9 id.11183	ebi-a-GCST90017045		-0.022	0.028	0.4322	104247	3011	finn-b-O15_MEMBR_PREMAT_RUPT
1720	rs7232121	G	C	0.0671292	0.014423	3.76e-06	14306	0.00151195	21.6596	genus Prevotella9 id.11183	ebi-a-GCST90017045		0.0148	0.027	0.5841	104247	3011	finn-b-O15_MEMBR_PREMAT_RUPT
1721	rs7237249	C	T	-0.0823764	0.0182126	8.93e-06	14306	0.00142798	20.4551	genus Prevotella9 id.11183	ebi-a-GCST90017045		-0.0518	0.0342	0.1294	104247	3011	finn-b-O15_MEMBR_PREMAT_RUPT
1722	rs72815774	T	C	-0.176186	0.0393068	8.78e-06	14306	0.00140242	20.0885	genus Prevotella9 id.11183	ebi-a-GCST90017045		-0.0087	0.0596	0.8838	104247	3011	finn-b-O15_MEMBR_PREMAT_RUPT
1723	rs746764	T	C	-0.0915771	0.0193245	2.04e-06	14306	0.00156732	22.4541	genus Prevotella9 id.11183	ebi-a-GCST90017045		0.0388	0.0326	0.2333	104247	3011	finn-b-O15_MEMBR_PREMAT_RUPT
1724	rs7976209	T	C	-0.0870786	0.0197951	7.28e-06	14306	0.00135084	19.3485	genus Prevotella9 id.11183	ebi-a-GCST90017045		-0.0141	0.037	0.703399	104247	3011	finn-b-O15_MEMBR_PREMAT_RUPT
1725	rs9428102	A	G	-0.0778845	0.0176068	4.62e-06	14306	0.00136593	19.565	genus Prevotella9 id.11183	ebi-a-GCST90017045		0.005	0.0325	0.8785	104247	3011	finn-b-O15_MEMBR_PREMAT_RUPT
1726	rs9613013	G	A	0.0917591	0.0202697	6.1e-06	14306	0.00143042	20.49	genus Prevotella9 id.11183	ebi-a-GCST90017045		0.0475	0.0411	0.2479	104247	3011	finn-b-O15_MEMBR_PREMAT_RUPT
1727	rs12501673	A	G	0.116395	0.0262253	6.29e-06	14306	0.00137503	19.6955	genus Rikenellaceae RC9 gut group id.11191	ebi-a-GCST90017046		-0.0263	0.0301	0.3834	104247	3011	finn-b-O15_MEMBR_PREMAT_RUPT
1728	rs17032291	T	C	-0.169579	0.0368251	6.61e-06	14306	0.00148011	21.2029	genus Rikenellaceae RC9 gut group id.11191	ebi-a-GCST90017046		0.0247	0.0405	0.5428	104247	3011	finn-b-O15_MEMBR_PREMAT_RUPT
1729	rs17582787	A	G	-0.157739	0.0339924	3.55e-06	14306	0.00150295	21.5305	genus Rikenellaceae RC9 gut group id.11191	ebi-a-GCST90017046		0.0106	0.0359	0.7678	104247	3011	finn-b-O15_MEMBR_PREMAT_RUPT
1730	rs2074881	T	C	-0.142236	0.032391	9.45e-06	14306	0.00134607	19.2801	genus Rikenellaceae RC9 gut group id.11191	ebi-a-GCST90017046		-0.0618	0.0395	0.1182	104247	3011	finn-b-O15_MEMBR_PREMAT_RUPT
1731	rs2900503	T	G	0.172329	0.0326671	1.55e-07	14306	0.00194148	27.825	genus Rikenellaceae RC9 gut group id.11191	ebi-a-GCST90017046		0.002	0.0361	0.9567	104247	3011	finn-b-O15_MEMBR_PREMAT_RUPT
1732	rs2998141	C	T	0.136346	0.0293073	4.42e-06	14306	0.00151063	21.6408	genus Rikenellaceae RC9 gut group id.11191	ebi-a-GCST90017046		0.0147	0.0317	0.6428	104247	3011	finn-b-O15_MEMBR_PREMAT_RUPT
1733	rs4270579	A	G	0.118021	0.0271041	5.46e-06	14306	0.00132359	18.9578	genus Rikenellaceae RC9 gut group id.11191	ebi-a-GCST90017046		0.0148	0.0286	0.6038	104247	3011	finn-b-O15_MEMBR_PREMAT_RUPT
1734	rs4717843	G	T	-0.119376	0.0260548	4.72e-06	14306	0.00146522	20.9893	genus Rikenellaceae RC9 gut group id.11191	ebi-a-GCST90017046		0.0013	0.0269	0.9611	104247	3011	finn-b-O15_MEMBR_PREMAT_RUPT
1735	rs7113155	C	G	-0.114423	0.0247798	5.26e-06	14306	0.00148822	21.3192	genus Rikenellaceae RC9 gut group id.11191	ebi-a-GCST90017046		-0.0304	0.0277	0.2722	104247	3011	finn-b-O15_MEMBR_PREMAT_RUPT
1736	rs7193937	C	G	-0.124153	0.027741	6.19e-06	14306	0.00139812	20.0267	genus Rikenellaceae RC9 gut group id.11191	ebi-a-GCST90017046		-0.0208	0.028	0.4581	104247	3011	finn-b-O15_MEMBR_PREMAT_RUPT
1737	rs7712231	A	G	0.156284	0.0350462	7.97e-06	14306	0.00138812	19.8832	genus Rikenellaceae RC9 gut group id.11191	ebi-a-GCST90017046		0.0311	0.0394	0.4305	104247	3011	finn-b-O15_MEMBR_PREMAT_RUPT
1738	rs80309088	G	A	0.17405	0.0383423	4.56e-06	14306	0.0014383	20.603	genus Rikenellaceae RC9 gut group id.11191	ebi-a-GCST90017046		-0.0873	0.0415	0.03535	104247	3011	finn-b-O15_MEMBR_PREMAT_RUPT
1739	rs9887954	G	A	-0.114849	0.0249013	4.81e-06	14306	0.00148473	21.2691	genus Rikenellaceae RC9 gut group id.11191	ebi-a-GCST90017046		0.0202	0.0271	0.4558	104247	3011	finn-b-O15_MEMBR_PREMAT_RUPT
1740	rs10279978	A	G	-0.0622202	0.0127675	1.17e-06	14306	0.00165734	23.746	genus Romboutsia id.11347	ebi-a-GCST90017047		0.0041	0.0288	0.8869	104247	3011	finn-b-O15_MEMBR_PREMAT_RUPT
1741	rs11221428	T	C	-0.0726779	0.0158263	6.49e-06	14306	0.00147193	21.0856	genus Romboutsia id.11347	ebi-a-GCST90017047		-0.049	0.0317	0.1219	104247	3011	finn-b-O15_MEMBR_PREMAT_RUPT
1742	rs114398731	G	C	-0.131039	0.0293815	7.96e-06	14306	0.00138845	19.8881	genus Romboutsia id.11347	ebi-a-GCST90017047		-0.0517	0.0592	0.3823	104247	3011	finn-b-O15_MEMBR_PREMAT_RUPT
1743	rs16843578	C	T	-0.0875276	0.0196779	5.08e-06	14306	0.00138106	19.7821	genus Romboutsia id.11347	ebi-a-GCST90017047		0.0143	0.06	0.8121	104247	3011	finn-b-O15_MEMBR_PREMAT_RUPT
1744	rs28603357	T	C	-0.214911	0.0474739	8.52e-06	14306	0.00143043	20.4902	genus Romboutsia id.11347	ebi-a-GCST90017047		-0.1069	0.0953	0.2619	104247	3011	finn-b-O15_MEMBR_PREMAT_RUPT
1745	rs34302036	G	A	-0.0550261	0.0120835	5.88e-06	14306	0.00144745	20.7344	genus Romboutsia id.11347	ebi-a-GCST90017047		0.0214	0.027	0.4275	104247	3011	finn-b-O15_MEMBR_PREMAT_RUPT
1746	rs61841503	G	A	0.092888	0.0171454	4e-08	14306	0.00204746	29.347	genus Romboutsia id.11347	ebi-a-GCST90017047		0.0002	0.0398	0.9959	104247	3011	finn-b-O15_MEMBR_PREMAT_RUPT
1747	rs62504452	A	G	-0.0710048	0.0156654	4.66e-06	14306	0.00143401	20.5415	genus Romboutsia id.11347	ebi-a-GCST90017047		-0.0295	0.0387	0.445	104247	3011	finn-b-O15_MEMBR_PREMAT_RUPT
1748	rs7109293	A	G	0.0919112	0.0205738	6.98e-06	14306	0.00139311	19.9548	genus Romboutsia id.11347	ebi-a-GCST90017047		-0.0415	0.0418	0.3212	104247	3011	finn-b-O15_MEMBR_PREMAT_RUPT
1749	rs75200530	T	G	-0.190644	0.0421065	5.07e-06	14306	0.00143089	20.4969	genus Romboutsia id.11347	ebi-a-GCST90017047		-0.0534	0.0795	0.5019	104247	3011	finn-b-O15_MEMBR_PREMAT_RUPT
1750	rs75987356	G	A	-0.129578	0.0280454	6.71e-06	14306	0.00148996	21.3441	genus Romboutsia id.11347	ebi-a-GCST90017047		0.0106	0.0505	0.8339	104247	3011	finn-b-O15_MEMBR_PREMAT_RUPT
1751	rs77702691	A	G	-0.094406	0.0208544	7.37e-06	14306	0.00143042	20.4901	genus Romboutsia id.11347	ebi-a-GCST90017047		0.0694	0.0469	0.1389	104247	3011	finn-b-O15_MEMBR_PREMAT_RUPT
1752	rs9389266	T	G	0.0722815	0.0162353	9.38e-06	14306	0.00138361	19.8186	genus Romboutsia id.11347	ebi-a-GCST90017047		0.0513	0.0349	0.1417	104247	3011	finn-b-O15_MEMBR_PREMAT_RUPT
1753	rs9567264	C	T	0.0580018	0.0127495	5.76e-06	14306	0.00144461	20.6936	genus Romboutsia id.11347	ebi-a-GCST90017047		-0.0268	0.0282	0.3427	104247	3011	finn-b-O15_MEMBR_PREMAT_RUPT
1754	rs116270582	T	A	-0.153844	0.0329324	1.2e-06	14306	0.00152312	21.8199	genus Roseburia id.2012	ebi-a-GCST90017048		-0.0689	0.0665	0.2999	104247	3011	finn-b-O15_MEMBR_PREMAT_RUPT
1755	rs12740451	T	C	0.0697527	0.0153607	7.34e-06	14306	0.00143932	20.6177	genus Roseburia id.2012	ebi-a-GCST90017048		0.0395	0.0393	0.3146	104247	3011	finn-b-O15_MEMBR_PREMAT_RUPT
1756	rs16910295	T	C	-0.0980434	0.020957	2.91e-06	14306	0.00152755	21.8836	genus Roseburia id.2012	ebi-a-GCST90017048		-0.0201	0.0593	0.7339	104247	3011	finn-b-O15_MEMBR_PREMAT_RUPT
1757	rs2034589	G	C	0.0629765	0.0123489	5.01e-07	14306	0.00181465	26.004	genus Roseburia id.2012	ebi-a-GCST90017048		-0.027	0.035	0.4399	104247	3011	finn-b-O15_MEMBR_PREMAT_RUPT
1758	rs2160994	C	T	-0.0550687	0.0112481	9.7e-07	14306	0.00167265	23.9657	genus Roseburia id.2012	ebi-a-GCST90017048		-0.0095	0.0282	0.7373	104247	3011	finn-b-O15_MEMBR_PREMAT_RUPT
1759	rs2943022	T	C	0.0493786	0.0106763	4.11e-06	14306	0.00149303	21.3883	genus Roseburia id.2012	ebi-a-GCST90017048		0.0175	0.0271	0.5177	104247	3011	finn-b-O15_MEMBR_PREMAT_RUPT
1760	rs302266	T	C	-0.0777312	0.0172985	8.13e-06	14306	0.00140943	20.1889	genus Roseburia id.2012	ebi-a-GCST90017048		-0.0095	0.0401	0.8129	104247	3011	finn-b-O15_MEMBR_PREMAT_RUPT
1761	rs329182	T	C	0.0690327	0.0152884	5.9e-06	14306	0.00142314	20.3857	genus Roseburia id.2012	ebi-a-GCST90017048		0.0385	0.0366	0.2926	104247	3011	finn-b-O15_MEMBR_PREMAT_RUPT
1762	rs4748237	G	C	0.0488326	0.0106404	4.67e-06	14306	0.0014701	21.0593	genus Roseburia id.2012	ebi-a-GCST90017048		-0.0014	0.0269	0.958	104247	3011	finn-b-O15_MEMBR_PREMAT_RUPT
1763	rs55858165	A	C	0.179284	0.0404954	9.99e-06	14306	0.00136823	19.598	genus Roseburia id.2012	ebi-a-GCST90017048		-0.0603	0.0705	0.3928	104247	3011	finn-b-O15_MEMBR_PREMAT_RUPT
1764	rs57466170	C	T	0.0741405	0.0171601	8.3e-06	14306	0.00130313	18.6643	genus Roseburia id.2012	ebi-a-GCST90017048		0.0569	0.0507	0.2619	104247	3011	finn-b-O15_MEMBR_PREMAT_RUPT
1765	rs6445851	A	G	0.0497336	0.0108158	3.53e-06	14306	0.00147578	21.1408	genus Roseburia id.2012	ebi-a-GCST90017048		-0.0132	0.0275	0.6316	104247	3011	finn-b-O15_MEMBR_PREMAT_RUPT
1766	rs6930661	C	T	-0.0961587	0.0204975	2.48e-06	14306	0.00153599	22.0047	genus Roseburia id.2012	ebi-a-GCST90017048		-0.0159	0.0563	0.7779	104247	3011	finn-b-O15_MEMBR_PREMAT_RUPT
1767	rs75326254	C	T	-0.104628	0.0230897	7.5e-06	14306	0.00143324	20.5305	genus Roseburia id.2012	ebi-a-GCST90017048		0.0311	0.0571	0.585901	104247	3011	finn-b-O15_MEMBR_PREMAT_RUPT
1768	rs75820970	C	G	-0.232125	0.0481562	1.48e-07	14306	0.0016215	23.2316	genus Roseburia id.2012	ebi-a-GCST90017048		-0.0258	0.0406	0.525	104247	3011	finn-b-O15_MEMBR_PREMAT_RUPT
1769	rs78753150	A	C	0.0968739	0.0214067	9.98e-06	14306	0.00142947	20.4764	genus Roseburia id.2012	ebi-a-GCST90017048		-0.0295	0.0445	0.5069	104247	3011	finn-b-O15_MEMBR_PREMAT_RUPT
1770	rs9300744	C	T	-0.0588452	0.0126228	4.75e-06	14306	0.00151682	21.7295	genus Roseburia id.2012	ebi-a-GCST90017048		-0.0207	0.0347	0.5505	104247	3011	finn-b-O15_MEMBR_PREMAT_RUPT
1771	rs10827477	A	G	-0.0547387	0.0115163	2.19e-06	14306	0.00157674	22.5893	genus Ruminiclostridium5 id.11355	ebi-a-GCST90017049		0.0199	0.0279	0.4746	104247	3011	finn-b-O15_MEMBR_PREMAT_RUPT
1772	rs113753996	T	C	0.0820689	0.0174463	3.99e-06	14306	0.0015444	22.1253	genus Ruminiclostridium5 id.11355	ebi-a-GCST90017049		-0.0026	0.0345	0.9398	104247	3011	finn-b-O15_MEMBR_PREMAT_RUPT
1773	rs1223978	C	T	-0.0484169	0.0108254	8.16e-06	14306	0.00139631	20.0007	genus Ruminiclostridium5 id.11355	ebi-a-GCST90017049		-0.0341	0.027	0.2054	104247	3011	finn-b-O15_MEMBR_PREMAT_RUPT
1774	rs1492620	T	C	-0.0830505	0.0180073	3.53e-06	14306	0.00148465	21.268	genus Ruminiclostridium5 id.11355	ebi-a-GCST90017049		0.0244	0.0399	0.5409	104247	3011	finn-b-O15_MEMBR_PREMAT_RUPT
1775	rs2286384	C	G	0.0518814	0.0107482	1.44e-06	14306	0.00162602	23.2965	genus Ruminiclostridium5 id.11355	ebi-a-GCST90017049		-0.0454	0.0266	0.0875992	104247	3011	finn-b-O15_MEMBR_PREMAT_RUPT
1776	rs243585	C	G	-0.0585939	0.0121017	1.33e-06	14306	0.001636	23.4397	genus Ruminiclostridium5 id.11355	ebi-a-GCST90017049		0.0391	0.0301	0.1945	104247	3011	finn-b-O15_MEMBR_PREMAT_RUPT
1777	rs2482038	C	A	0.0518991	0.0108777	1.7e-06	14306	0.00158868	22.7607	genus Ruminiclostridium5 id.11355	ebi-a-GCST90017049		-0.012	0.0272	0.659699	104247	3011	finn-b-O15_MEMBR_PREMAT_RUPT
1778	rs2791343	T	C	0.051717	0.0113369	5.54e-06	14306	0.00145254	20.8074	genus Ruminiclostridium5 id.11355	ebi-a-GCST90017049		0.0328	0.0272	0.2279	104247	3011	finn-b-O15_MEMBR_PREMAT_RUPT
1779	rs2801960	G	C	-0.0520975	0.0115111	6.21e-06	14306	0.00142975	20.4804	genus Ruminiclostridium5 id.11355	ebi-a-GCST90017049		-0.0013	0.0292	0.965	104247	3011	finn-b-O15_MEMBR_PREMAT_RUPT
1780	rs2833828	G	A	0.0489617	0.0108702	6.82e-06	14306	0.00141613	20.2851	genus Ruminiclostridium5 id.11355	ebi-a-GCST90017049		-0.0421	0.0272	0.1214	104247	3011	finn-b-O15_MEMBR_PREMAT_RUPT
1781	rs4955951	A	G	-0.0713749	0.0165826	9.96e-06	14306	0.00129332	18.5236	genus Ruminiclostridium5 id.11355	ebi-a-GCST90017049		-0.0397	0.0415	0.3387	104247	3011	finn-b-O15_MEMBR_PREMAT_RUPT
1782	rs6121460	G	A	0.0932955	0.0199206	2.64e-06	14306	0.00153085	21.9309	genus Ruminiclostridium5 id.11355	ebi-a-GCST90017049		0.0121	0.0496	0.8076	104247	3011	finn-b-O15_MEMBR_PREMAT_RUPT
1783	rs73002572	G	C	0.181548	0.0414078	8.82e-06	14306	0.00134189	19.2202	genus Ruminiclostridium5 id.11355	ebi-a-GCST90017049		-0.0046	0.0417	0.9114	104247	3011	finn-b-O15_MEMBR_PREMAT_RUPT
1784	rs79968837	A	G	-0.0950311	0.0193507	1.15e-06	14306	0.00168302	24.1145	genus Ruminiclostridium5 id.11355	ebi-a-GCST90017049		-0.0012	0.0606	0.9838	104247	3011	finn-b-O15_MEMBR_PREMAT_RUPT
1785	rs8053158	G	A	0.0740543	0.0159151	5.9e-06	14306	0.00151115	21.6482	genus Ruminiclostridium5 id.11355	ebi-a-GCST90017049		-0.0005	0.0414	0.9901	104247	3011	finn-b-O15_MEMBR_PREMAT_RUPT
1786	rs10829821	T	C	-0.097606	0.0216072	3.47e-06	14306	0.00142436	20.4031	genus Ruminiclostridium6 id.11356	ebi-a-GCST90017050		-0.0011	0.0467	0.9818	104247	3011	finn-b-O15_MEMBR_PREMAT_RUPT
1787	rs116969552	A	G	-0.166823	0.0376681	9.16e-06	14306	0.00136915	19.6112	genus Ruminiclostridium6 id.11356	ebi-a-GCST90017050		0.0807	0.0799	0.3124	104247	3011	finn-b-O15_MEMBR_PREMAT_RUPT
1788	rs11992182	A	C	0.0625299	0.0137876	4.65e-06	14306	0.00143567	20.5654	genus Ruminiclostridium6 id.11356	ebi-a-GCST90017050		-0.0158	0.032	0.621299	104247	3011	finn-b-O15_MEMBR_PREMAT_RUPT
1789	rs1871858	C	G	-0.105422	0.0237274	9.12e-06	14306	0.00137799	19.7379	genus Ruminiclostridium6 id.11356	ebi-a-GCST90017050		0.0262	0.0422	0.5349	104247	3011	finn-b-O15_MEMBR_PREMAT_RUPT
1790	rs2548459	C	T	0.0554866	0.0122755	6.4e-06	14306	0.00142613	20.4285	genus Ruminiclostridium6 id.11356	ebi-a-GCST90017050		-0.0106	0.0271	0.696599	104247	3011	finn-b-O15_MEMBR_PREMAT_RUPT
1791	rs35362464	C	A	0.0720077	0.0165387	8.99e-06	14306	0.00132331	18.9537	genus Ruminiclostridium6 id.11356	ebi-a-GCST90017050		-0.0421	0.0384	0.2732	104247	3011	finn-b-O15_MEMBR_PREMAT_RUPT
1792	rs61060922	T	G	0.15913	0.0322283	1.09e-06	14306	0.00170126	24.3763	genus Ruminiclostridium6 id.11356	ebi-a-GCST90017050		0.0361	0.0738	0.625299	104247	3011	finn-b-O15_MEMBR_PREMAT_RUPT
1793	rs663262	C	T	0.13498	0.0310715	3.39e-06	14306	0.00131742	18.8692	genus Ruminiclostridium6 id.11356	ebi-a-GCST90017050		-0.0498	0.0742	0.501601	104247	3011	finn-b-O15_MEMBR_PREMAT_RUPT
1794	rs67479537	T	C	0.118994	0.026487	9.3e-06	14306	0.00140881	20.1801	genus Ruminiclostridium6 id.11356	ebi-a-GCST90017050		-0.1322	0.0629	0.0356	104247	3011	finn-b-O15_MEMBR_PREMAT_RUPT
1795	rs71414120	T	G	0.200894	0.0406434	1.08e-06	14306	0.00170488	24.4283	genus Ruminiclostridium6 id.11356	ebi-a-GCST90017050		0.0722	0.0613	0.239	104247	3011	finn-b-O15_MEMBR_PREMAT_RUPT
1796	rs72991535	T	G	0.135604	0.0295174	4.95e-06	14306	0.00147309	21.1022	genus Ruminiclostridium6 id.11356	ebi-a-GCST90017050		0.1602	0.0721	0.0261999	104247	3011	finn-b-O15_MEMBR_PREMAT_RUPT
1797	rs73176030	T	C	0.058665	0.013208	7.29e-06	14306	0.00137711	19.7253	genus Ruminiclostridium6 id.11356	ebi-a-GCST90017050		-0.0372	0.03	0.2148	104247	3011	finn-b-O15_MEMBR_PREMAT_RUPT
1798	rs77193512	A	G	0.0736533	0.0153163	1.3e-06	14306	0.00161383	23.1215	genus Ruminiclostridium6 id.11356	ebi-a-GCST90017050		-0.0218	0.0311	0.483	104247	3011	finn-b-O15_MEMBR_PREMAT_RUPT
1799	rs792058	G	A	0.0554234	0.0125423	8.58e-06	14306	0.00136308	19.5241	genus Ruminiclostridium6 id.11356	ebi-a-GCST90017050		0.017	0.0271	0.531401	104247	3011	finn-b-O15_MEMBR_PREMAT_RUPT
1800	rs79968172	G	A	0.11614	0.0243083	1.66e-06	14306	0.0015931	22.8241	genus Ruminiclostridium6 id.11356	ebi-a-GCST90017050		0.0472	0.0567	0.4049	104247	3011	finn-b-O15_MEMBR_PREMAT_RUPT
1801	rs9555756	A	C	-0.0804138	0.0176692	7.1e-06	14306	0.00144571	20.7094	genus Ruminiclostridium6 id.11356	ebi-a-GCST90017050		0.1001	0.0483	0.0383504	104247	3011	finn-b-O15_MEMBR_PREMAT_RUPT
1802	rs113048721	C	G	0.0600735	0.0132737	4.1e-06	14306	0.00142969	20.4796	genus Ruminiclostridium9 id.11357	ebi-a-GCST90017051		0.0515	0.0376	0.1716	104247	3011	finn-b-O15_MEMBR_PREMAT_RUPT
1803	rs12040548	G	T	0.0570422	0.0122359	3.15e-06	14306	0.00151685	21.73	genus Ruminiclostridium9 id.11357	ebi-a-GCST90017051		-0.0187	0.0301	0.533801	104247	3011	finn-b-O15_MEMBR_PREMAT_RUPT
1804	rs12419854	T	A	-0.0727975	0.0155594	3.18e-06	14306	0.00152779	21.887	genus Ruminiclostridium9 id.11357	ebi-a-GCST90017051		0.0412	0.0303	0.1746	104247	3011	finn-b-O15_MEMBR_PREMAT_RUPT
1805	rs13033315	T	A	0.0511195	0.0111418	5.68e-06	14306	0.00146928	21.0476	genus Ruminiclostridium9 id.11357	ebi-a-GCST90017051		-0.0186	0.0286	0.5158	104247	3011	finn-b-O15_MEMBR_PREMAT_RUPT
1806	rs57665991	C	G	-0.0641507	0.0123339	2.07e-07	14306	0.0018874	27.0484	genus Ruminiclostridium9 id.11357	ebi-a-GCST90017051		-0.0008	0.031	0.9782	104247	3011	finn-b-O15_MEMBR_PREMAT_RUPT
1807	rs6082461	C	A	-0.0586425	0.0131004	4.87e-06	14306	0.00139872	20.0353	genus Ruminiclostridium9 id.11357	ebi-a-GCST90017051		0.0075	0.033	0.82	104247	3011	finn-b-O15_MEMBR_PREMAT_RUPT
1808	rs7137760	C	T	0.050797	0.0112182	7.07e-06	14306	0.00143117	20.5007	genus Ruminiclostridium9 id.11357	ebi-a-GCST90017051		-0.0089	0.0269	0.739399	104247	3011	finn-b-O15_MEMBR_PREMAT_RUPT
1809	rs73592673	A	T	-0.081629	0.0169515	2.14e-06	14306	0.00161827	23.1853	genus Ruminiclostridium9 id.11357	ebi-a-GCST90017051		0.0531	0.0401	0.1852	104247	3011	finn-b-O15_MEMBR_PREMAT_RUPT
1810	rs74303178	T	C	0.0532742	0.0119274	7.92e-06	14306	0.00139258	19.9472	genus Ruminiclostridium9 id.11357	ebi-a-GCST90017051		0.0211	0.0288	0.4647	104247	3011	finn-b-O15_MEMBR_PREMAT_RUPT
1811	rs78191726	T	C	0.0944998	0.0210206	7.58e-06	14306	0.00141072	20.2074	genus Ruminiclostridium9 id.11357	ebi-a-GCST90017051		0.1669	0.0513	0.00115001	104247	3011	finn-b-O15_MEMBR_PREMAT_RUPT
1812	rs79082720	C	G	0.0928576	0.0204871	6.47e-06	14306	0.00143395	20.5406	genus Ruminiclostridium9 id.11357	ebi-a-GCST90017051		-0.0508	0.0628	0.4191	104247	3011	finn-b-O15_MEMBR_PREMAT_RUPT
1813	rs918449	G	A	0.0950908	0.0197177	2.56e-06	14306	0.00162308	23.2543	genus Ruminiclostridium9 id.11357	ebi-a-GCST90017051		-0.017	0.0516	0.7415	104247	3011	finn-b-O15_MEMBR_PREMAT_RUPT
1814	rs9522712	T	C	0.0699728	0.0154939	4.66e-06	14306	0.00142364	20.3928	genus Ruminiclostridium9 id.11357	ebi-a-GCST90017051		-0.0629	0.0375	0.0930294	104247	3011	finn-b-O15_MEMBR_PREMAT_RUPT
1815	rs9809789	C	T	-0.0717454	0.0159673	8.72e-06	14306	0.00140927	20.1867	genus Ruminiclostridium9 id.11357	ebi-a-GCST90017051		0.0045	0.0345	0.8954	104247	3011	finn-b-O15_MEMBR_PREMAT_RUPT
1816	rs11241747	T	C	-0.0533858	0.0120035	6.59e-06	14306	0.00138076	19.7777	genus Ruminococcaceae NK4A214 group id.11358	ebi-a-GCST90017052		0.0171	0.0295	0.561399	104247	3011	finn-b-O15_MEMBR_PREMAT_RUPT
1817	rs114244418	C	G	-0.175266	0.0372779	3.59e-06	14306	0.00154278	22.102	genus Ruminococcaceae NK4A214 group id.11358	ebi-a-GCST90017052		0.0173	0.0674	0.7973	104247	3011	finn-b-O15_MEMBR_PREMAT_RUPT
1818	rs11586410	G	A	-0.0863422	0.0169937	3.66e-07	14306	0.00180123	25.8113	genus Ruminococcaceae NK4A214 group id.11358	ebi-a-GCST90017052		0.0423	0.0371	0.2548	104247	3011	finn-b-O15_MEMBR_PREMAT_RUPT
1819	rs12642039	C	T	0.0553003	0.0119397	3.43e-06	14306	0.00149727	21.449	genus Ruminococcaceae NK4A214 group id.11358	ebi-a-GCST90017052		0.0017	0.0278	0.9512	104247	3011	finn-b-O15_MEMBR_PREMAT_RUPT
1820	rs12731	A	G	-0.0527684	0.0115053	4.87e-06	14306	0.00146824	21.0325	genus Ruminococcaceae NK4A214 group id.11358	ebi-a-GCST90017052		0.0143	0.0276	0.6047	104247	3011	finn-b-O15_MEMBR_PREMAT_RUPT
1821	rs13087692	G	T	-0.0574623	0.012594	8.69e-06	14306	0.00145308	20.8151	genus Ruminococcaceae NK4A214 group id.11358	ebi-a-GCST90017052		0.0201	0.0292	0.4916	104247	3011	finn-b-O15_MEMBR_PREMAT_RUPT
1822	rs136761	A	G	0.0587521	0.0119155	8.15e-07	14306	0.00169655	24.3087	genus Ruminococcaceae NK4A214 group id.11358	ebi-a-GCST90017052		-0.0187	0.0278	0.5007	104247	3011	finn-b-O15_MEMBR_PREMAT_RUPT
1823	rs147475196	A	G	-0.133769	0.0295196	4.72e-06	14306	0.00143334	20.5319	genus Ruminococcaceae NK4A214 group id.11358	ebi-a-GCST90017052		-0.0179	0.0434	0.679499	104247	3011	finn-b-O15_MEMBR_PREMAT_RUPT
1824	rs34576931	G	C	-0.0873312	0.0194886	4.72e-06	14306	0.00140168	20.0778	genus Ruminococcaceae NK4A214 group id.11358	ebi-a-GCST90017052		-0.038	0.0531	0.474	104247	3011	finn-b-O15_MEMBR_PREMAT_RUPT
1825	rs35559912	T	C	-0.0925071	0.0203674	4.89e-06	14306	0.00143991	20.6262	genus Ruminococcaceae NK4A214 group id.11358	ebi-a-GCST90017052		0.0014	0.041	0.9727	104247	3011	finn-b-O15_MEMBR_PREMAT_RUPT
1826	rs4814689	C	T	-0.1083	0.0230708	4.55e-06	14306	0.00153796	22.0329	genus Ruminococcaceae NK4A214 group id.11358	ebi-a-GCST90017052		-0.0278	0.0644	0.6664	104247	3011	finn-b-O15_MEMBR_PREMAT_RUPT
1827	rs5994253	A	G	-0.0811302	0.0157621	2.35e-07	14306	0.00184848	26.4896	genus Ruminococcaceae NK4A214 group id.11358	ebi-a-GCST90017052		-0.0179	0.0384	0.6413	104247	3011	finn-b-O15_MEMBR_PREMAT_RUPT
1828	rs62027366	T	C	0.0615389	0.0137612	6.58e-06	14306	0.00139592	19.9952	genus Ruminococcaceae NK4A214 group id.11358	ebi-a-GCST90017052		-0.0318	0.0334	0.3401	104247	3011	finn-b-O15_MEMBR_PREMAT_RUPT
1829	rs6681678	T	C	0.100174	0.024	9.05e-06	14306	0.0012163	17.4191	genus Ruminococcaceae NK4A214 group id.11358	ebi-a-GCST90017052		-0.0731	0.0741	0.3237	104247	3011	finn-b-O15_MEMBR_PREMAT_RUPT
1830	rs73158814	C	G	-0.109257	0.0227458	2.2e-06	14306	0.00161019	23.0694	genus Ruminococcaceae NK4A214 group id.11358	ebi-a-GCST90017052		0.1161	0.0718	0.1058	104247	3011	finn-b-O15_MEMBR_PREMAT_RUPT
1831	rs7573569	T	C	0.107739	0.0233638	3.23e-06	14306	0.00148421	21.2617	genus Ruminococcaceae NK4A214 group id.11358	ebi-a-GCST90017052		0.0027	0.0555	0.9616	104247	3011	finn-b-O15_MEMBR_PREMAT_RUPT
1832	rs10916131	C	T	-0.069333	0.0146753	2.87e-06	14306	0.0015578	22.3175	genus Ruminococcaceae UCG002 id.11360	ebi-a-GCST90017053		0.0247	0.0365	0.4984	104247	3011	finn-b-O15_MEMBR_PREMAT_RUPT
1833	rs10927423	C	A	-0.0713617	0.0147712	8.5e-07	14306	0.00162882	23.3366	genus Ruminococcaceae UCG002 id.11360	ebi-a-GCST90017053		0.0311	0.0349	0.3724	104247	3011	finn-b-O15_MEMBR_PREMAT_RUPT
1834	rs10964441	G	A	-0.14906	0.034486	7.45e-06	14306	0.00130422	18.68	genus Ruminococcaceae UCG002 id.11360	ebi-a-GCST90017053		-0.043	0.0438	0.326	104247	3011	finn-b-O15_MEMBR_PREMAT_RUPT
1835	rs113147300	A	G	-0.075842	0.0164562	7.69e-06	14306	0.00148251	21.2373	genus Ruminococcaceae UCG002 id.11360	ebi-a-GCST90017053		0.0185	0.0388	0.6343	104247	3011	finn-b-O15_MEMBR_PREMAT_RUPT
1836	rs11607472	A	G	-0.0780229	0.0176325	7.19e-06	14306	0.0013668	19.5774	genus Ruminococcaceae UCG002 id.11360	ebi-a-GCST90017053		0.0407	0.0535	0.4465	104247	3011	finn-b-O15_MEMBR_PREMAT_RUPT
1837	rs116974815	C	A	-0.189731	0.0396566	2.03e-06	14306	0.00159747	22.8868	genus Ruminococcaceae UCG002 id.11360	ebi-a-GCST90017053		-0.0295	0.0532	0.5798	104247	3011	finn-b-O15_MEMBR_PREMAT_RUPT
1838	rs11750293	G	T	-0.0578304	0.0120512	1.76e-06	14306	0.00160707	23.0245	genus Ruminococcaceae UCG002 id.11360	ebi-a-GCST90017053		-0.016	0.0277	0.5628	104247	3011	finn-b-O15_MEMBR_PREMAT_RUPT
1839	rs12463378	A	G	-0.0522061	0.0112086	2.96e-06	14306	0.00151413	21.691	genus Ruminococcaceae UCG002 id.11360	ebi-a-GCST90017053		0.0104	0.0291	0.7214	104247	3011	finn-b-O15_MEMBR_PREMAT_RUPT
1840	rs15256	C	T	0.0732376	0.016834	9.46e-06	14306	0.0013213	18.9249	genus Ruminococcaceae UCG002 id.11360	ebi-a-GCST90017053		0.0044	0.0412	0.9142	104247	3011	finn-b-O15_MEMBR_PREMAT_RUPT
1841	rs2265670	C	G	-0.0512404	0.0109287	2.99e-06	14306	0.00153427	21.98	genus Ruminococcaceae UCG002 id.11360	ebi-a-GCST90017053		0.0349	0.0268	0.1935	104247	3011	finn-b-O15_MEMBR_PREMAT_RUPT
1842	rs362417	G	C	-0.054863	0.0120984	7.8e-06	14306	0.00143536	20.5609	genus Ruminococcaceae UCG002 id.11360	ebi-a-GCST90017053		0.011	0.0328	0.7381	104247	3011	finn-b-O15_MEMBR_PREMAT_RUPT
1843	rs55793120	T	C	0.137396	0.027414	4.81e-07	14306	0.00175276	25.1155	genus Ruminococcaceae UCG002 id.11360	ebi-a-GCST90017053		0.0096	0.0563	0.8646	104247	3011	finn-b-O15_MEMBR_PREMAT_RUPT
1844	rs56030423	G	A	-0.0982874	0.0216344	6.3e-06	14306	0.00144066	20.6369	genus Ruminococcaceae UCG002 id.11360	ebi-a-GCST90017053		-0.0016	0.052	0.9758	104247	3011	finn-b-O15_MEMBR_PREMAT_RUPT
1845	rs57079348	T	G	-0.0765729	0.0172819	7.22e-06	14306	0.00137042	19.6294	genus Ruminococcaceae UCG002 id.11360	ebi-a-GCST90017053		-0.0198	0.0577	0.7314	104247	3011	finn-b-O15_MEMBR_PREMAT_RUPT
1846	rs6542556	G	A	-0.050974	0.011406	7.86e-06	14306	0.00139414	19.9696	genus Ruminococcaceae UCG002 id.11360	ebi-a-GCST90017053		-0.0039	0.0275	0.8858	104247	3011	finn-b-O15_MEMBR_PREMAT_RUPT
1847	rs67746927	C	G	-0.054237	0.0110357	9.17e-07	14306	0.00168555	24.1508	genus Ruminococcaceae UCG002 id.11360	ebi-a-GCST90017053		0.0101	0.0271	0.710101	104247	3011	finn-b-O15_MEMBR_PREMAT_RUPT
1848	rs6793778	T	C	0.0558706	0.0125258	9.81e-06	14306	0.00138878	19.8928	genus Ruminococcaceae UCG002 id.11360	ebi-a-GCST90017053		0.008	0.0305	0.792801	104247	3011	finn-b-O15_MEMBR_PREMAT_RUPT
1849	rs7120052	A	C	0.0624796	0.0135523	1.97e-06	14306	0.0014835	21.2515	genus Ruminococcaceae UCG002 id.11360	ebi-a-GCST90017053		0.0277	0.0341	0.4166	104247	3011	finn-b-O15_MEMBR_PREMAT_RUPT
1850	rs7155595	C	A	0.0569929	0.0116986	1.15e-06	14306	0.00165629	23.7308	genus Ruminococcaceae UCG002 id.11360	ebi-a-GCST90017053		0.0057	0.0292	0.8449	104247	3011	finn-b-O15_MEMBR_PREMAT_RUPT
1851	rs7249614	G	A	0.0492778	0.0110807	9.07e-06	14306	0.00138054	19.7746	genus Ruminococcaceae UCG002 id.11360	ebi-a-GCST90017053		-0.0266	0.0274	0.3317	104247	3011	finn-b-O15_MEMBR_PREMAT_RUPT
1852	rs72874194	G	C	-0.0770289	0.016725	3.47e-06	14306	0.00148052	21.2087	genus Ruminococcaceae UCG002 id.11360	ebi-a-GCST90017053		-0.0162	0.039	0.677801	104247	3011	finn-b-O15_MEMBR_PREMAT_RUPT
1853	rs7342369	A	C	0.0527803	0.0116023	5.66e-06	14306	0.00144447	20.6916	genus Ruminococcaceae UCG002 id.11360	ebi-a-GCST90017053		-0.035	0.0308	0.2555	104247	3011	finn-b-O15_MEMBR_PREMAT_RUPT
1854	rs76847269	A	G	0.163508	0.0356151	5.17e-06	14306	0.00147113	21.0741	genus Ruminococcaceae UCG002 id.11360	ebi-a-GCST90017053		0.1229	0.0839	0.143	104247	3011	finn-b-O15_MEMBR_PREMAT_RUPT
1855	rs77564310	A	C	-0.0713093	0.0140855	3.29e-07	14306	0.00178835	25.6264	genus Ruminococcaceae UCG002 id.11360	ebi-a-GCST90017053		-0.0604	0.033	0.0671305	104247	3011	finn-b-O15_MEMBR_PREMAT_RUPT
1856	rs79016051	C	T	-0.0887747	0.0189424	2.34e-06	14306	0.00153294	21.9608	genus Ruminococcaceae UCG002 id.11360	ebi-a-GCST90017053		0.0665	0.04	0.0966006	104247	3011	finn-b-O15_MEMBR_PREMAT_RUPT
1857	rs882348	A	G	-0.0799946	0.0178618	5.45e-06	14306	0.00140005	20.0544	genus Ruminococcaceae UCG002 id.11360	ebi-a-GCST90017053		-0.0197	0.0414	0.6341	104247	3011	finn-b-O15_MEMBR_PREMAT_RUPT
1858	rs10490280	C	T	-0.0672094	0.0143309	4.16e-06	14306	0.00153507	21.9914	genus Ruminococcaceae UCG003 id.11361	ebi-a-GCST90017054		0.0171	0.034	0.6158	104247	3011	finn-b-O15_MEMBR_PREMAT_RUPT
1859	rs11243416	T	C	-0.0925653	0.0191203	1.67e-06	14306	0.0016356	23.434	genus Ruminococcaceae UCG003 id.11361	ebi-a-GCST90017054		-0.0153	0.0529	0.7732	104247	3011	finn-b-O15_MEMBR_PREMAT_RUPT
1860	rs11613919	G	T	0.0727604	0.0155716	1.63e-06	14306	0.00152385	21.8305	genus Ruminococcaceae UCG003 id.11361	ebi-a-GCST90017054		-0.0509	0.0322	0.1144	104247	3011	finn-b-O15_MEMBR_PREMAT_RUPT
1861	rs139730	G	C	-0.0577655	0.0130645	9.72e-06	14306	0.00136471	19.5475	genus Ruminococcaceae UCG003 id.11361	ebi-a-GCST90017054		-0.0419	0.0312	0.1793	104247	3011	finn-b-O15_MEMBR_PREMAT_RUPT
1862	rs16959793	A	C	-0.062527	0.0131259	2.22e-06	14306	0.00158369	22.689	genus Ruminococcaceae UCG003 id.11361	ebi-a-GCST90017054		0.043	0.0271	0.1131	104247	3011	finn-b-O15_MEMBR_PREMAT_RUPT
1863	rs2523124	C	T	0.0546625	0.0120823	5.78e-06	14306	0.0014287	20.4653	genus Ruminococcaceae UCG003 id.11361	ebi-a-GCST90017054		0.0389	0.0273	0.1538	104247	3011	finn-b-O15_MEMBR_PREMAT_RUPT
1864	rs3013089	G	A	-0.0551473	0.0120346	4.38e-06	14306	0.00146565	20.9954	genus Ruminococcaceae UCG003 id.11361	ebi-a-GCST90017054		0.0354	0.0275	0.1993	104247	3011	finn-b-O15_MEMBR_PREMAT_RUPT
1865	rs4452755	A	C	-0.0634463	0.0134741	3.29e-06	14306	0.00154747	22.1693	genus Ruminococcaceae UCG003 id.11361	ebi-a-GCST90017054		0.016	0.0284	0.5734	104247	3011	finn-b-O15_MEMBR_PREMAT_RUPT
1866	rs4532474	G	A	0.0769231	0.017045	4.82e-06	14306	0.00142162	20.3638	genus Ruminococcaceae UCG003 id.11361	ebi-a-GCST90017054		-0.047	0.0364	0.196	104247	3011	finn-b-O15_MEMBR_PREMAT_RUPT
1867	rs4629039	A	T	-0.0553742	0.0122659	6.54e-06	14306	0.00142259	20.3777	genus Ruminococcaceae UCG003 id.11361	ebi-a-GCST90017054		-0.0215	0.0275	0.4347	104247	3011	finn-b-O15_MEMBR_PREMAT_RUPT
1868	rs646327	G	A	0.0586696	0.0118369	7.83e-07	14306	0.0017143	24.5635	genus Ruminococcaceae UCG003 id.11361	ebi-a-GCST90017054		-0.0114	0.0271	0.674899	104247	3011	finn-b-O15_MEMBR_PREMAT_RUPT
1869	rs6759615	A	G	0.102523	0.0200204	7.86e-07	14306	0.00182971	26.2202	genus Ruminococcaceae UCG003 id.11361	ebi-a-GCST90017054		-0.0292	0.0448	0.514	104247	3011	finn-b-O15_MEMBR_PREMAT_RUPT
1870	rs73165080	T	A	0.117283	0.025971	7.21e-06	14306	0.0014235	20.3907	genus Ruminococcaceae UCG003 id.11361	ebi-a-GCST90017054		0.0078	0.0685	0.909	104247	3011	finn-b-O15_MEMBR_PREMAT_RUPT
1871	rs73341549	T	C	-0.169857	0.0318768	1.51e-07	14306	0.00198079	28.3894	genus Ruminococcaceae UCG003 id.11361	ebi-a-GCST90017054		-0.0107	0.0573	0.8513	104247	3011	finn-b-O15_MEMBR_PREMAT_RUPT
1872	rs78720113	A	G	-0.115348	0.0249601	7.59e-06	14306	0.0014906	21.3534	genus Ruminococcaceae UCG003 id.11361	ebi-a-GCST90017054		0.1077	0.05	0.0312702	104247	3011	finn-b-O15_MEMBR_PREMAT_RUPT
1873	rs10976229	T	G	0.095976	0.0214554	7.04e-06	14306	0.00139678	20.0074	genus Ruminococcaceae UCG004 id.11362	ebi-a-GCST90017055		-0.0421	0.0398	0.2907	104247	3011	finn-b-O15_MEMBR_PREMAT_RUPT
1874	rs11961899	G	A	-0.0707825	0.0161381	9.18e-06	14306	0.0013429	19.2347	genus Ruminococcaceae UCG004 id.11362	ebi-a-GCST90017055		-0.0333	0.0298	0.2629	104247	3011	finn-b-O15_MEMBR_PREMAT_RUPT
1875	rs12125734	G	T	0.133972	0.0257416	2.09e-07	14306	0.00188981	27.083	genus Ruminococcaceae UCG004 id.11362	ebi-a-GCST90017055		0.0027	0.0458	0.9524	104247	3011	finn-b-O15_MEMBR_PREMAT_RUPT
1876	rs2248146	T	C	0.0689452	0.0153649	8.2e-06	14306	0.00140546	20.132	genus Ruminococcaceae UCG004 id.11362	ebi-a-GCST90017055		0.0246	0.0281	0.3808	104247	3011	finn-b-O15_MEMBR_PREMAT_RUPT
1877	rs3800154	A	C	-0.0797959	0.0177639	6.12e-06	14306	0.00140849	20.1755	genus Ruminococcaceae UCG004 id.11362	ebi-a-GCST90017055		-0.0425	0.0306	0.1643	104247	3011	finn-b-O15_MEMBR_PREMAT_RUPT
1878	rs511258	G	A	-0.0757474	0.0162475	4.52e-06	14306	0.001517	21.7321	genus Ruminococcaceae UCG004 id.11362	ebi-a-GCST90017055		0.0277	0.0343	0.4193	104247	3011	finn-b-O15_MEMBR_PREMAT_RUPT
1879	rs550351	A	C	0.078587	0.018003	9.43e-06	14306	0.00133019	19.0525	genus Ruminococcaceae UCG004 id.11362	ebi-a-GCST90017055		0.045	0.027	0.0956093	104247	3011	finn-b-O15_MEMBR_PREMAT_RUPT
1880	rs6769553	A	G	0.0849743	0.0157451	7.91e-08	14306	0.00203181	29.1222	genus Ruminococcaceae UCG004 id.11362	ebi-a-GCST90017055		0.0239	0.0304	0.4328	104247	3011	finn-b-O15_MEMBR_PREMAT_RUPT
1881	rs7123615	C	G	-0.0786157	0.0179592	7.09e-06	14306	0.00133766	19.1595	genus Ruminococcaceae UCG004 id.11362	ebi-a-GCST90017055		-0.0435	0.0337	0.1973	104247	3011	finn-b-O15_MEMBR_PREMAT_RUPT
1882	rs7569771	A	G	-0.075914	0.0170308	8.12e-06	14306	0.00138692	19.8661	genus Ruminococcaceae UCG004 id.11362	ebi-a-GCST90017055		0.0208	0.031	0.5019	104247	3011	finn-b-O15_MEMBR_PREMAT_RUPT
1883	rs872501	G	A	0.116125	0.025946	5.81e-06	14306	0.00139825	20.0286	genus Ruminococcaceae UCG004 id.11362	ebi-a-GCST90017055		0.004	0.0501	0.9364	104247	3011	finn-b-O15_MEMBR_PREMAT_RUPT
1884	rs9818949	T	G	-0.0859927	0.0188671	5.39e-06	14306	0.00144999	20.7707	genus Ruminococcaceae UCG004 id.11362	ebi-a-GCST90017055		-0.0653	0.0338	0.0532905	104247	3011	finn-b-O15_MEMBR_PREMAT_RUPT
1885	rs10873449	C	T	-0.0654843	0.0143973	4.11e-06	14306	0.001444	20.6848	genus Ruminococcaceae UCG005 id.11363	ebi-a-GCST90017056		-0.0463	0.034	0.1731	104247	3011	finn-b-O15_MEMBR_PREMAT_RUPT
1886	rs10937802	A	G	-0.0755811	0.0168226	8.17e-06	14306	0.001409	20.1827	genus Ruminococcaceae UCG005 id.11363	ebi-a-GCST90017056		-0.0623	0.0414	0.1317	104247	3011	finn-b-O15_MEMBR_PREMAT_RUPT
1887	rs10950694	C	T	-0.0577628	0.011412	4.3e-07	14306	0.00178763	25.6161	genus Ruminococcaceae UCG005 id.11363	ebi-a-GCST90017056		0.0269	0.0279	0.3338	104247	3011	finn-b-O15_MEMBR_PREMAT_RUPT
1888	rs114279581	A	G	-0.146604	0.0316034	3.22e-06	14306	0.00150194	21.5161	genus Ruminococcaceae UCG005 id.11363	ebi-a-GCST90017056		0.0051	0.0506	0.9201	104247	3011	finn-b-O15_MEMBR_PREMAT_RUPT
1889	rs12288512	A	G	0.066635	0.0144356	3.1e-06	14306	0.0014872	21.3047	genus Ruminococcaceae UCG005 id.11363	ebi-a-GCST90017056		0.019	0.0314	0.545301	104247	3011	finn-b-O15_MEMBR_PREMAT_RUPT
1890	rs12458218	T	C	0.0677322	0.0144525	2.41e-06	14306	0.00153292	21.9606	genus Ruminococcaceae UCG005 id.11363	ebi-a-GCST90017056		0.047	0.0348	0.1772	104247	3011	finn-b-O15_MEMBR_PREMAT_RUPT
1891	rs2893871	G	A	-0.073644	0.015548	3.54e-06	14306	0.00156577	22.4318	genus Ruminococcaceae UCG005 id.11363	ebi-a-GCST90017056		-0.0102	0.0428	0.811	104247	3011	finn-b-O15_MEMBR_PREMAT_RUPT
1892	rs34781347	G	A	0.188685	0.0386484	6.05e-07	14306	0.0016633	23.8315	genus Ruminococcaceae UCG005 id.11363	ebi-a-GCST90017056		-0.0767	0.0519	0.1396	104247	3011	finn-b-O15_MEMBR_PREMAT_RUPT
1893	rs35166120	G	C	0.0686153	0.0146252	3.75e-06	14306	0.00153622	22.0078	genus Ruminococcaceae UCG005 id.11363	ebi-a-GCST90017056		-0.0011	0.0323	0.972	104247	3011	finn-b-O15_MEMBR_PREMAT_RUPT
1894	rs394449	A	T	0.0692909	0.0148712	2.6e-06	14306	0.00151525	21.707	genus Ruminococcaceae UCG005 id.11363	ebi-a-GCST90017056		0.0253	0.0397	0.5242	104247	3011	finn-b-O15_MEMBR_PREMAT_RUPT
1895	rs55793120	T	C	0.121548	0.0279546	7.37e-06	14306	0.00131977	18.9029	genus Ruminococcaceae UCG005 id.11363	ebi-a-GCST90017056		0.0096	0.0563	0.8646	104247	3011	finn-b-O15_MEMBR_PREMAT_RUPT
1896	rs60081663	C	G	0.158082	0.0319586	9.28e-07	14306	0.00170737	24.4641	genus Ruminococcaceae UCG005 id.11363	ebi-a-GCST90017056		-0.0505	0.077	0.5121	104247	3011	finn-b-O15_MEMBR_PREMAT_RUPT
1897	rs72776570	C	A	0.087067	0.0197179	5.36e-06	14306	0.00136106	19.4951	genus Ruminococcaceae UCG005 id.11363	ebi-a-GCST90017056		0.0162	0.0454	0.721099	104247	3011	finn-b-O15_MEMBR_PREMAT_RUPT
1898	rs7449320	C	A	0.0599163	0.0130836	4.81e-06	14306	0.0014638	20.9689	genus Ruminococcaceae UCG005 id.11363	ebi-a-GCST90017056		-0.028	0.0316	0.3761	104247	3011	finn-b-O15_MEMBR_PREMAT_RUPT
1899	rs7555878	G	A	-0.0586677	0.0125277	2.81e-06	14306	0.00153064	21.9278	genus Ruminococcaceae UCG005 id.11363	ebi-a-GCST90017056		0.0349	0.031	0.2599	104247	3011	finn-b-O15_MEMBR_PREMAT_RUPT
1900	rs7586445	G	A	0.0782349	0.0176458	8.81e-06	14306	0.00137216	19.6543	genus Ruminococcaceae UCG005 id.11363	ebi-a-GCST90017056		-0.052	0.0397	0.1906	104247	3011	finn-b-O15_MEMBR_PREMAT_RUPT
1901	rs898577	C	T	0.123012	0.0286671	7.46e-06	14306	0.00128544	18.4105	genus Ruminococcaceae UCG005 id.11363	ebi-a-GCST90017056		0.0619	0.0582	0.2873	104247	3011	finn-b-O15_MEMBR_PREMAT_RUPT
1902	rs113006825	T	C	-0.0928893	0.0208035	7.98e-06	14306	0.00139167	19.9342	genus Ruminococcaceae UCG009 id.11366	ebi-a-GCST90017057		-0.0339	0.0327	0.2999	104247	3011	finn-b-O15_MEMBR_PREMAT_RUPT
1903	rs12508214	C	T	-0.0774649	0.0168937	4.75e-06	14306	0.00146759	21.0232	genus Ruminococcaceae UCG009 id.11366	ebi-a-GCST90017057		0.082	0.0284	0.00396698	104247	3011	finn-b-O15_MEMBR_PREMAT_RUPT
1904	rs138460696	A	G	0.139274	0.0315794	9.81e-06	14306	0.00135776	19.4479	genus Ruminococcaceae UCG009 id.11366	ebi-a-GCST90017057		-0.063	0.0509	0.2163	104247	3011	finn-b-O15_MEMBR_PREMAT_RUPT
1905	rs1550196	A	G	-0.130842	0.0262478	1.13e-06	14306	0.00173395	24.8455	genus Ruminococcaceae UCG009 id.11366	ebi-a-GCST90017057		-0.0006	0.0445	0.9898	104247	3011	finn-b-O15_MEMBR_PREMAT_RUPT
1906	rs2058609	G	A	-0.0816464	0.017472	3.12e-06	14306	0.00152408	21.8337	genus Ruminococcaceae UCG009 id.11366	ebi-a-GCST90017057		-0.0256	0.0298	0.3913	104247	3011	finn-b-O15_MEMBR_PREMAT_RUPT
1907	rs2192926	A	G	-0.089048	0.0192989	4.88e-06	14306	0.001486	21.2874	genus Ruminococcaceae UCG009 id.11366	ebi-a-GCST90017057		-0.0492	0.0283	0.0825392	104247	3011	finn-b-O15_MEMBR_PREMAT_RUPT
1908	rs4079028	C	T	0.0915623	0.019936	3.28e-06	14306	0.00147231	21.091	genus Ruminococcaceae UCG009 id.11366	ebi-a-GCST90017057		0.0105	0.0312	0.7361	104247	3011	finn-b-O15_MEMBR_PREMAT_RUPT
1909	rs4708333	T	G	-0.084033	0.0174757	1.56e-06	14306	0.00161366	23.119	genus Ruminococcaceae UCG009 id.11366	ebi-a-GCST90017057		0.0546	0.0282	0.0529798	104247	3011	finn-b-O15_MEMBR_PREMAT_RUPT
1910	rs61779334	G	C	-0.138137	0.0292072	1.94e-06	14306	0.00156115	22.3655	genus Ruminococcaceae UCG009 id.11366	ebi-a-GCST90017057		0.0035	0.0453	0.938	104247	3011	finn-b-O15_MEMBR_PREMAT_RUPT
1911	rs6952765	G	A	0.0732099	0.0166777	8.13e-06	14306	0.00134513	19.2667	genus Ruminococcaceae UCG009 id.11366	ebi-a-GCST90017057		0.0196	0.0287	0.4952	104247	3011	finn-b-O15_MEMBR_PREMAT_RUPT
1912	rs758191	T	G	0.17702	0.0375113	9.01e-06	14306	0.00155427	22.2669	genus Ruminococcaceae UCG009 id.11366	ebi-a-GCST90017057		0.0209	0.045	0.6428	104247	3011	finn-b-O15_MEMBR_PREMAT_RUPT
1913	rs78410648	A	G	0.120989	0.0277317	9.67e-06	14306	0.00132875	19.0317	genus Ruminococcaceae UCG009 id.11366	ebi-a-GCST90017057		0.0204	0.0429	0.6341	104247	3011	finn-b-O15_MEMBR_PREMAT_RUPT
1914	rs8009993	G	C	-0.135936	0.0244857	4.42e-08	14306	0.00214977	30.8165	genus Ruminococcaceae UCG009 id.11366	ebi-a-GCST90017057		0.0066	0.0375	0.8598	104247	3011	finn-b-O15_MEMBR_PREMAT_RUPT
1915	rs9558661	T	C	-0.0897823	0.0200739	7.01e-06	14306	0.00139635	20.0013	genus Ruminococcaceae UCG009 id.11366	ebi-a-GCST90017057		0.0291	0.0333	0.3831	104247	3011	finn-b-O15_MEMBR_PREMAT_RUPT
1916	rs12597105	A	G	-0.0670855	0.0144415	4.87e-06	14306	0.00150612	21.5761	genus Ruminococcaceae UCG010 id.11367	ebi-a-GCST90017058		-0.0389	0.0341	0.254	104247	3011	finn-b-O15_MEMBR_PREMAT_RUPT
1917	rs2820282	C	A	0.0592304	0.0125917	2.85e-06	14306	0.0015443	22.1238	genus Ruminococcaceae UCG010 id.11367	ebi-a-GCST90017058		-0.0177	0.0273	0.5182	104247	3011	finn-b-O15_MEMBR_PREMAT_RUPT
1918	rs35506912	G	C	-0.0693743	0.0147926	3.21e-06	14306	0.00153505	21.9911	genus Ruminococcaceae UCG010 id.11367	ebi-a-GCST90017058		0.0269	0.0332	0.4176	104247	3011	finn-b-O15_MEMBR_PREMAT_RUPT
1919	rs682403	A	G	-0.0588161	0.0124671	2.37e-06	14306	0.00155335	22.2536	genus Ruminococcaceae UCG010 id.11367	ebi-a-GCST90017058		-0.0357	0.0267	0.1822	104247	3011	finn-b-O15_MEMBR_PREMAT_RUPT
1920	rs6958419	C	T	-0.0585718	0.0124994	2.84e-06	14306	0.00153255	21.9552	genus Ruminococcaceae UCG010 id.11367	ebi-a-GCST90017058		0.0031	0.0267	0.9064	104247	3011	finn-b-O15_MEMBR_PREMAT_RUPT
1921	rs73218807	G	A	-0.166211	0.0367938	6.43e-06	14306	0.0014244	20.4037	genus Ruminococcaceae UCG010 id.11367	ebi-a-GCST90017058		-0.0992	0.0491	0.0432902	104247	3011	finn-b-O15_MEMBR_PREMAT_RUPT
1922	rs7441445	T	C	0.05695	0.0126502	6.8e-06	14306	0.00141468	20.2643	genus Ruminococcaceae UCG010 id.11367	ebi-a-GCST90017058		0.0069	0.0268	0.7966	104247	3011	finn-b-O15_MEMBR_PREMAT_RUPT
1923	rs7935775	T	A	0.0631351	0.0137953	4.99e-06	14306	0.00146193	20.942	genus Ruminococcaceae UCG010 id.11367	ebi-a-GCST90017058		0.011	0.0305	0.7173	104247	3011	finn-b-O15_MEMBR_PREMAT_RUPT
1924	rs10274562	C	T	0.110917	0.0244556	6.5e-06	14306	0.00143581	20.5674	genus Ruminococcaceae UCG011 id.11368	ebi-a-GCST90017059		-0.0053	0.0274	0.846	104247	3011	finn-b-O15_MEMBR_PREMAT_RUPT
1925	rs12636310	G	A	0.132725	0.0282037	2.81e-06	14306	0.00154562	22.1428	genus Ruminococcaceae UCG011 id.11368	ebi-a-GCST90017059		0.0026	0.0308	0.9321	104247	3011	finn-b-O15_MEMBR_PREMAT_RUPT
1926	rs12724320	C	T	-0.120881	0.0249229	1.52e-06	14306	0.00164167	23.5211	genus Ruminococcaceae UCG011 id.11368	ebi-a-GCST90017059		0.0194	0.0275	0.4814	104247	3011	finn-b-O15_MEMBR_PREMAT_RUPT
1927	rs1416041	A	C	-0.182339	0.0339898	7.04e-08	14306	0.00200757	28.7741	genus Ruminococcaceae UCG011 id.11368	ebi-a-GCST90017059		-0.009	0.0331	0.7854	104247	3011	finn-b-O15_MEMBR_PREMAT_RUPT
1928	rs2729556	T	C	0.109097	0.0233699	3.19e-06	14306	0.00152101	21.7897	genus Ruminococcaceae UCG011 id.11368	ebi-a-GCST90017059		-0.0075	0.0269	0.7788	104247	3011	finn-b-O15_MEMBR_PREMAT_RUPT
1929	rs4490371	T	C	-0.111816	0.0248963	7.75e-06	14306	0.00140802	20.1687	genus Ruminococcaceae UCG011 id.11368	ebi-a-GCST90017059		-0.0265	0.0272	0.3307	104247	3011	finn-b-O15_MEMBR_PREMAT_RUPT
1930	rs79113084	C	T	-0.152166	0.0317519	2.06e-06	14306	0.00160281	22.9633	genus Ruminococcaceae UCG011 id.11368	ebi-a-GCST90017059		-0.0358	0.044	0.416	104247	3011	finn-b-O15_MEMBR_PREMAT_RUPT
1931	rs9729514	G	A	-0.184934	0.0394616	2.37e-06	14306	0.00153285	21.9595	genus Ruminococcaceae UCG011 id.11368	ebi-a-GCST90017059		0.0158	0.0458	0.7307	104247	3011	finn-b-O15_MEMBR_PREMAT_RUPT
1932	rs11581881	C	T	0.0661211	0.0144736	4.73e-06	14306	0.00145672	20.8673	genus Ruminococcaceae UCG013 id.11370	ebi-a-GCST90017060		-0.0344	0.0318	0.2792	104247	3011	finn-b-O15_MEMBR_PREMAT_RUPT
1933	rs12189346	G	A	0.0684961	0.014558	1.68e-06	14306	0.00154504	22.1344	genus Ruminococcaceae UCG013 id.11370	ebi-a-GCST90017060		0.0236	0.0343	0.4914	104247	3011	finn-b-O15_MEMBR_PREMAT_RUPT
1934	rs12336782	T	C	-0.0856047	0.0189311	8.6e-06	14306	0.00142727	20.4448	genus Ruminococcaceae UCG013 id.11370	ebi-a-GCST90017060		-0.1061	0.0501	0.0343202	104247	3011	finn-b-O15_MEMBR_PREMAT_RUPT
1935	rs12485353	G	A	-0.0607903	0.0130847	4.19e-06	14306	0.0015065	21.5814	genus Ruminococcaceae UCG013 id.11370	ebi-a-GCST90017060		0.011	0.0308	0.721	104247	3011	finn-b-O15_MEMBR_PREMAT_RUPT
1936	rs12781711	C	T	-0.0656129	0.0117477	2.55e-08	14306	0.00217575	31.1898	genus Ruminococcaceae UCG013 id.11370	ebi-a-GCST90017060		0.0059	0.0309	0.8482	104247	3011	finn-b-O15_MEMBR_PREMAT_RUPT
1937	rs16918863	A	C	0.111491	0.0240157	4.15e-06	14306	0.00150424	21.5491	genus Ruminococcaceae UCG013 id.11370	ebi-a-GCST90017060		-0.051	0.0551	0.3544	104247	3011	finn-b-O15_MEMBR_PREMAT_RUPT
1938	rs1729063	C	G	0.0533411	0.0120757	9.64e-06	14306	0.00136204	19.5092	genus Ruminococcaceae UCG013 id.11370	ebi-a-GCST90017060		-0.0284	0.0281	0.3127	104247	3011	finn-b-O15_MEMBR_PREMAT_RUPT
1939	rs2428106	C	G	-0.0490863	0.0109903	8.38e-06	14306	0.00139244	19.9453	genus Ruminococcaceae UCG013 id.11370	ebi-a-GCST90017060		-0.0558	0.0271	0.0393496	104247	3011	finn-b-O15_MEMBR_PREMAT_RUPT
1940	rs2730183	G	A	-0.0488692	0.0109907	8.44e-06	14306	0.00138007	19.7678	genus Ruminococcaceae UCG013 id.11370	ebi-a-GCST90017060		-0.0188	0.0273	0.4917	104247	3011	finn-b-O15_MEMBR_PREMAT_RUPT
1941	rs4385846	T	G	-0.0598404	0.0131807	6.46e-06	14306	0.00143869	20.6087	genus Ruminococcaceae UCG013 id.11370	ebi-a-GCST90017060		-0.0226	0.0339	0.5042	104247	3011	finn-b-O15_MEMBR_PREMAT_RUPT
1942	rs75088940	T	C	-0.0942968	0.0200712	2.55e-06	14306	0.00154049	22.0692	genus Ruminococcaceae UCG013 id.11370	ebi-a-GCST90017060		-0.0406	0.0521	0.4362	104247	3011	finn-b-O15_MEMBR_PREMAT_RUPT
1943	rs76973485	G	T	0.194976	0.0418213	3.35e-06	14306	0.00151701	21.7323	genus Ruminococcaceae UCG013 id.11370	ebi-a-GCST90017060		0.0647	0.0682	0.3427	104247	3011	finn-b-O15_MEMBR_PREMAT_RUPT
1944	rs7784330	A	G	0.0498329	0.0112066	8.16e-06	14306	0.00138028	19.7708	genus Ruminococcaceae UCG013 id.11370	ebi-a-GCST90017060		0.0202	0.0278	0.4665	104247	3011	finn-b-O15_MEMBR_PREMAT_RUPT
1945	rs9313055	T	C	0.105087	0.023446	9.55e-06	14306	0.00140227	20.0863	genus Ruminococcaceae UCG013 id.11370	ebi-a-GCST90017060		0.0193	0.0485	0.6901	104247	3011	finn-b-O15_MEMBR_PREMAT_RUPT
1946	rs9565219	T	A	-0.0524592	0.0117701	8.73e-06	14306	0.00138663	19.862	genus Ruminococcaceae UCG013 id.11370	ebi-a-GCST90017060		0.0144	0.0272	0.596	104247	3011	finn-b-O15_MEMBR_PREMAT_RUPT
1947	rs10495392	T	C	0.082486	0.0187194	9.96e-06	14306	0.00135541	19.414	genus Ruminococcaceae UCG014 id.11371	ebi-a-GCST90017061		0.0783	0.0513	0.1274	104247	3011	finn-b-O15_MEMBR_PREMAT_RUPT
1948	rs10791168	G	A	0.0664624	0.0150069	9.76e-06	14306	0.00136917	19.6114	genus Ruminococcaceae UCG014 id.11371	ebi-a-GCST90017061		-0.0276	0.0347	0.426	104247	3011	finn-b-O15_MEMBR_PREMAT_RUPT
1949	rs10941294	C	T	-0.122057	0.0260017	2.4e-06	14306	0.00153793	22.0324	genus Ruminococcaceae UCG014 id.11371	ebi-a-GCST90017061		0.0477	0.0594	0.4216	104247	3011	finn-b-O15_MEMBR_PREMAT_RUPT
1950	rs115777838	T	C	-0.18835	0.0386643	4.62e-07	14306	0.00165605	23.7274	genus Ruminococcaceae UCG014 id.11371	ebi-a-GCST90017061		-0.0125	0.0425	0.7687	104247	3011	finn-b-O15_MEMBR_PREMAT_RUPT
1951	rs12638134	T	G	0.0582548	0.0119657	1.21e-06	14306	0.00165405	23.6988	genus Ruminococcaceae UCG014 id.11371	ebi-a-GCST90017061		0.0054	0.0269	0.8413	104247	3011	finn-b-O15_MEMBR_PREMAT_RUPT
1952	rs17296933	C	G	-0.0829544	0.0185058	7.34e-06	14306	0.0014026	20.091	genus Ruminococcaceae UCG014 id.11371	ebi-a-GCST90017061		-0.1017	0.0424	0.0164199	104247	3011	finn-b-O15_MEMBR_PREMAT_RUPT
1953	rs34402072	C	T	-0.0688023	0.0156083	9.8e-06	14306	0.0013564	19.4283	genus Ruminococcaceae UCG014 id.11371	ebi-a-GCST90017061		0.0235	0.038	0.5374	104247	3011	finn-b-O15_MEMBR_PREMAT_RUPT
1954	rs439810	C	G	0.0577127	0.0126675	7.04e-06	14306	0.00144881	20.7539	genus Ruminococcaceae UCG014 id.11371	ebi-a-GCST90017061		0.0002	0.0284	0.9941	104247	3011	finn-b-O15_MEMBR_PREMAT_RUPT
1955	rs56105232	G	A	0.139276	0.0299132	2.91e-06	14306	0.00151304	21.6753	genus Ruminococcaceae UCG014 id.11371	ebi-a-GCST90017061		0.0084	0.0555	0.8794	104247	3011	finn-b-O15_MEMBR_PREMAT_RUPT
1956	rs61898819	A	T	0.0607865	0.0138761	9.92e-06	14306	0.00133961	19.1875	genus Ruminococcaceae UCG014 id.11371	ebi-a-GCST90017061		-0.0218	0.034	0.521601	104247	3011	finn-b-O15_MEMBR_PREMAT_RUPT
1957	rs62478832	T	A	-0.058129	0.012903	6.04e-06	14306	0.00141668	20.2929	genus Ruminococcaceae UCG014 id.11371	ebi-a-GCST90017061		-0.0057	0.0282	0.8407	104247	3011	finn-b-O15_MEMBR_PREMAT_RUPT
1958	rs72809222	T	C	0.0671775	0.0139838	2.41e-06	14306	0.00161057	23.0747	genus Ruminococcaceae UCG014 id.11371	ebi-a-GCST90017061		-0.0028	0.0328	0.9331	104247	3011	finn-b-O15_MEMBR_PREMAT_RUPT
1959	rs73186226	G	A	-0.0993852	0.0216819	6.72e-06	14306	0.00146654	21.0082	genus Ruminococcaceae UCG014 id.11371	ebi-a-GCST90017061		0.0713	0.0517	0.1675	104247	3011	finn-b-O15_MEMBR_PREMAT_RUPT
1960	rs74060145	C	G	-0.115767	0.0254199	8.71e-06	14306	0.00144769	20.7377	genus Ruminococcaceae UCG014 id.11371	ebi-a-GCST90017061		0.0935	0.0494	0.0584494	104247	3011	finn-b-O15_MEMBR_PREMAT_RUPT
1961	rs77627087	C	G	0.067562	0.0150103	7.43e-06	14306	0.00141414	20.2566	genus Ruminococcaceae UCG014 id.11371	ebi-a-GCST90017061		-0.0402	0.0353	0.2555	104247	3011	finn-b-O15_MEMBR_PREMAT_RUPT
1962	rs79640386	T	A	-0.110863	0.0248098	8.74e-06	14306	0.00139381	19.9648	genus Ruminococcaceae UCG014 id.11371	ebi-a-GCST90017061		-0.0319	0.0396	0.4211	104247	3011	finn-b-O15_MEMBR_PREMAT_RUPT
1963	rs853612	A	G	-0.0528257	0.0119367	9.75e-06	14306	0.00136713	19.5822	genus Ruminococcaceae UCG014 id.11371	ebi-a-GCST90017061		-0.0132	0.0273	0.6276	104247	3011	finn-b-O15_MEMBR_PREMAT_RUPT
1964	rs995642	C	T	0.060048	0.0126417	1.9e-06	14306	0.00157465	22.5593	genus Ruminococcaceae UCG014 id.11371	ebi-a-GCST90017061		-0.0153	0.0313	0.6254	104247	3011	finn-b-O15_MEMBR_PREMAT_RUPT
1965	rs10167839	A	G	0.0519509	0.0116306	8.09e-06	14306	0.0013927	19.949	genus Ruminococcus1 id.11373	ebi-a-GCST90017062		0.0177	0.0279	0.5251	104247	3011	finn-b-O15_MEMBR_PREMAT_RUPT
1966	rs10769159	C	G	0.0640277	0.0110059	5.29e-09	14306	0.00236015	33.8395	genus Ruminococcus1 id.11373	ebi-a-GCST90017062		0.0297	0.0273	0.2772	104247	3011	finn-b-O15_MEMBR_PREMAT_RUPT
1967	rs10995816	C	G	-0.0762002	0.0174689	8.38e-06	14306	0.00132827	19.0248	genus Ruminococcus1 id.11373	ebi-a-GCST90017062		0.0577	0.0424	0.1733	104247	3011	finn-b-O15_MEMBR_PREMAT_RUPT
1968	rs11783695	G	T	-0.0734114	0.0161398	4.73e-06	14306	0.00144406	20.6857	genus Ruminococcus1 id.11373	ebi-a-GCST90017062		-0.011	0.0367	0.764499	104247	3011	finn-b-O15_MEMBR_PREMAT_RUPT
1969	rs17781867	C	T	0.0999271	0.0211728	1.96e-06	14306	0.00155459	22.2715	genus Ruminococcus1 id.11373	ebi-a-GCST90017062		-0.0812	0.0531	0.1261	104247	3011	finn-b-O15_MEMBR_PREMAT_RUPT
1970	rs3000856	A	T	0.0709997	0.0162766	9.28e-06	14306	0.00132828	19.025	genus Ruminococcus1 id.11373	ebi-a-GCST90017062		0.0331	0.0364	0.3627	104247	3011	finn-b-O15_MEMBR_PREMAT_RUPT
1971	rs3819978	C	T	-0.11504	0.0260137	8.74e-06	14306	0.00136516	19.5539	genus Ruminococcus1 id.11373	ebi-a-GCST90017062		-0.0126	0.0497	0.8001	104247	3011	finn-b-O15_MEMBR_PREMAT_RUPT
1972	rs4849717	T	A	0.132764	0.0299816	8.83e-06	14306	0.00136879	19.6061	genus Ruminococcus1 id.11373	ebi-a-GCST90017062		0.0042	0.0512	0.9341	104247	3011	finn-b-O15_MEMBR_PREMAT_RUPT
1973	rs6105066	T	C	-0.0607052	0.013425	5.06e-06	14306	0.0014272	20.4438	genus Ruminococcus1 id.11373	ebi-a-GCST90017062		0.0268	0.0301	0.3725	104247	3011	finn-b-O15_MEMBR_PREMAT_RUPT
1974	rs6493760	T	C	-0.0535262	0.0115885	3.38e-06	14306	0.00148906	21.3313	genus Ruminococcus1 id.11373	ebi-a-GCST90017062		-0.0084	0.028	0.763901	104247	3011	finn-b-O15_MEMBR_PREMAT_RUPT
1975	rs7117576	A	G	0.0829505	0.0170891	6.48e-07	14306	0.00164425	23.558	genus Ruminococcus1 id.11373	ebi-a-GCST90017062		-0.0314	0.0464	0.4987	104247	3011	finn-b-O15_MEMBR_PREMAT_RUPT
1976	rs7583465	C	T	0.0527654	0.0112619	2.56e-06	14306	0.00153211	21.949	genus Ruminococcus1 id.11373	ebi-a-GCST90017062		0.0005	0.0267	0.9857	104247	3011	finn-b-O15_MEMBR_PREMAT_RUPT
1977	rs78572139	G	A	0.125038	0.0279411	5.23e-06	14306	0.00139788	20.0233	genus Ruminococcus1 id.11373	ebi-a-GCST90017062		-0.0205	0.0445	0.6453	104247	3011	finn-b-O15_MEMBR_PREMAT_RUPT
1978	rs78613526	G	A	0.167497	0.0367639	5.11e-06	14306	0.00144885	20.7544	genus Ruminococcus1 id.11373	ebi-a-GCST90017062		0.0563	0.0615	0.3602	104247	3011	finn-b-O15_MEMBR_PREMAT_RUPT
1979	rs12406309	A	C	-0.063193	0.0142275	9.79e-06	14306	0.0013771	19.7251	genus Ruminococcus2 id.11374	ebi-a-GCST90017063		0.0079	0.0322	0.8059	104247	3011	finn-b-O15_MEMBR_PREMAT_RUPT
1980	rs12986628	T	C	-0.0665937	0.0140168	2.14e-06	14306	0.00157531	22.5688	genus Ruminococcus2 id.11374	ebi-a-GCST90017063		0.0233	0.0338	0.4903	104247	3011	finn-b-O15_MEMBR_PREMAT_RUPT
1981	rs1819812	G	T	0.0842356	0.0184893	5.28e-06	14306	0.00144878	20.7534	genus Ruminococcus2 id.11374	ebi-a-GCST90017063		-0.0186	0.0605	0.758799	104247	3011	finn-b-O15_MEMBR_PREMAT_RUPT
1982	rs2368224	T	G	0.199648	0.0438453	3.63e-06	14306	0.00144723	20.7311	genus Ruminococcus2 id.11374	ebi-a-GCST90017063		0.0603	0.0619	0.3298	104247	3011	finn-b-O15_MEMBR_PREMAT_RUPT
1983	rs2846589	T	G	-0.0522093	0.0116382	7.59e-06	14306	0.00140474	20.1216	genus Ruminococcus2 id.11374	ebi-a-GCST90017063		-0.0204	0.0274	0.4577	104247	3011	finn-b-O15_MEMBR_PREMAT_RUPT
1984	rs2997412	G	A	0.0568439	0.0122325	4.22e-06	14306	0.00150718	21.5912	genus Ruminococcus2 id.11374	ebi-a-GCST90017063		0.0099	0.03	0.740699	104247	3011	finn-b-O15_MEMBR_PREMAT_RUPT
1985	rs4400279	A	G	0.0546114	0.0120077	5.8e-06	14306	0.00144378	20.6817	genus Ruminococcus2 id.11374	ebi-a-GCST90017063		0.0158	0.0285	0.578699	104247	3011	finn-b-O15_MEMBR_PREMAT_RUPT
1986	rs4799823	C	T	0.0837001	0.0182263	5.4e-06	14306	0.00147196	21.086	genus Ruminococcus2 id.11374	ebi-a-GCST90017063		0.0462	0.0345	0.1813	104247	3011	finn-b-O15_MEMBR_PREMAT_RUPT
1987	rs55707116	C	A	0.0865522	0.0189141	8.01e-06	14306	0.00146161	20.9375	genus Ruminococcus2 id.11374	ebi-a-GCST90017063		0.0293	0.0506	0.562999	104247	3011	finn-b-O15_MEMBR_PREMAT_RUPT
1988	rs58681734	A	G	0.0723875	0.0160787	4.18e-06	14306	0.00141479	20.2658	genus Ruminococcus2 id.11374	ebi-a-GCST90017063		0.0293	0.0327	0.3702	104247	3011	finn-b-O15_MEMBR_PREMAT_RUPT
1989	rs61791565	T	C	-0.0523503	0.0117119	6.79e-06	14306	0.00139463	19.9767	genus Ruminococcus2 id.11374	ebi-a-GCST90017063		0.0413	0.0269	0.1239	104247	3011	finn-b-O15_MEMBR_PREMAT_RUPT
1990	rs75140805	T	G	0.0836825	0.0176445	3.95e-06	14306	0.00156982	22.49	genus Ruminococcus2 id.11374	ebi-a-GCST90017063		-0.0226	0.0352	0.5211	104247	3011	finn-b-O15_MEMBR_PREMAT_RUPT
1991	rs7635831	G	A	0.0618344	0.0129031	1.98e-06	14306	0.00160272	22.9621	genus Ruminococcus2 id.11374	ebi-a-GCST90017063		0.0191	0.0279	0.493	104247	3011	finn-b-O15_MEMBR_PREMAT_RUPT
1992	rs7693984	G	A	-0.102822	0.0235087	9.42e-06	14306	0.00133541	19.1273	genus Ruminococcus2 id.11374	ebi-a-GCST90017063		-0.026	0.0645	0.6867	104247	3011	finn-b-O15_MEMBR_PREMAT_RUPT
1993	rs78120384	A	G	-0.192815	0.0392045	3.31e-07	14306	0.00168794	24.1852	genus Ruminococcus2 id.11374	ebi-a-GCST90017063		0.0593	0.0462	0.1999	104247	3011	finn-b-O15_MEMBR_PREMAT_RUPT
1994	rs10931481	A	G	-0.0610096	0.0130484	3.38e-06	14306	0.00152581	21.8585	genus Ruminococcus gauvreauii group id.11342	ebi-a-GCST90017064		-0.0267	0.0294	0.3646	104247	3011	finn-b-O15_MEMBR_PREMAT_RUPT
1995	rs12079579	A	G	0.0955324	0.0213436	5.04e-06	14306	0.00139843	20.0311	genus Ruminococcus gauvreauii group id.11342	ebi-a-GCST90017064		-0.0496	0.0482	0.3029	104247	3011	finn-b-O15_MEMBR_PREMAT_RUPT
1996	rs12539819	C	T	0.110654	0.0240684	4.49e-06	14306	0.0014753	21.1339	genus Ruminococcus gauvreauii group id.11342	ebi-a-GCST90017064		0.0518	0.0542	0.3391	104247	3011	finn-b-O15_MEMBR_PREMAT_RUPT
[truncated: 726 more rows]
