# Supplementary material for: Causal associations between gut microbiota and premature rupture of membranes: a two-sample Mendelian randomization study
Source: Front Immunol. 2024 Sep 2;15:1440232. doi: 10.3389/fimmu.2024.1440232 (PMC11402717; doi:10.3389/fimmu.2024.1440232)
Supplement: Supplementary file 2 [file Table2.xlsx]

## Sheet: mr_mes_orp0.05
The results of MR analysis
exposure	outcome	method	nsnp	β	se	pval	lo_ci	up_ci	or	or_lci95	or_uci95
class Mollicutes	Premature rupture of membranes	MR Egger	12	0.101994	0.410266	0.808698	-0.702127	0.906114	1.10738	0.49553	2.47469
		Inverse variance weighted	12	-0.256956	0.121448	0.0343648	-0.494994	-0.0189174	0.773402	0.609575	0.98126
		Simple mode	12	-0.316829	0.26857	0.263008	-0.843225	0.209568	0.728456	0.43032	1.23314
		Weighted mode	12	-0.221615	0.236975	0.36977	-0.686087	0.242856	0.801224	0.503543	1.27489
		Weighted median	12	-0.252091	0.165745	0.128272	-0.576951	0.0727699	0.777174	0.561608	1.07548
family Actinomycetaceae	Premature rupture of membranes	MR Egger	5	-0.61175	0.535813	0.336445	-1.66194	0.438443	0.542401	0.18977	1.55029
		Inverse variance weighted	5	-0.299855	0.216823	0.166682	-0.724828	0.125119	0.740926	0.484408	1.13328
		Simple mode	5	-0.483439	0.251686	0.127154	-0.976744	0.00986631	0.616659	0.376535	1.00992
		Weighted mode	5	-0.510273	0.220015	0.0812021	-0.941502	-0.0790437	0.600332	0.390042	0.924
		Weighted median	5	-0.494647	0.198831	0.0128545	-0.884355	-0.104938	0.609786	0.41298	0.90038
genus Collinsella	Premature rupture of membranes	MR Egger	9	0.66193	0.650268	0.342595	-0.612596	1.93646	1.93853	0.541942	6.93413
		Inverse variance weighted	9	0.36714	0.173004	0.0338259	0.0280511	0.706228	1.4436	1.02845	2.02633
		Simple mode	9	0.514442	0.354659	0.184962	-0.18069	1.20957	1.67271	0.834694	3.35206
		Weighted mode	9	0.469329	0.347057	0.213257	-0.210902	1.14956	1.59892	0.809854	3.1568
		Weighted median	9	0.421882	0.23798	0.0762676	-0.0445581	0.888323	1.52483	0.95642	2.43105
genus Dorea	Premature rupture of membranes	MR Egger	10	-0.84675	0.534937	0.152103	-1.89523	0.201727	0.428806	0.150284	1.22351
		Inverse variance weighted	10	-0.228585	0.197585	0.247315	-0.61585	0.158681	0.795659	0.540181	1.17196
		Simple mode	10	-0.566349	0.432341	0.222657	-1.41374	0.281039	0.567594	0.243232	1.32451
		Weighted mode	10	-0.590287	0.356298	0.131956	-1.28863	0.108058	0.554168	0.275648	1.11411
		Weighted median	10	-0.494654	0.24755	0.0456951	-0.979852	-0.0094562	0.609782	0.375367	0.990588
genus Family XIII AD3011 group	Premature rupture of membranes	MR Egger	13	0.0719767	0.809956	0.930786	-1.51554	1.65949	1.07463	0.21969	5.25663
		Inverse variance weighted	13	0.223969	0.16476	0.174032	-0.0989613	0.546899	1.25103	0.905778	1.72789
		Simple mode	13	0.648395	0.377515	0.111554	-0.0915353	1.38833	1.91247	0.912529	4.00813
		Weighted mode	13	0.604426	0.345123	0.105382	-0.0720156	1.28087	1.8302	0.930516	3.59976
		Weighted median	13	0.432715	0.194258	0.0259119	0.0519698	0.813461	1.54144	1.05334	2.2557
genus Intestinibacter	Premature rupture of membranes	MR Egger	15	0.161552	0.364754	0.665115	-0.553367	0.87647	1.17533	0.575011	2.4024
		Inverse variance weighted	15	0.265075	0.111982	0.0179268	0.0455906	0.484559	1.30353	1.04665	1.62346
		Simple mode	15	0.326436	0.243207	0.200888	-0.150249	0.803121	1.38602	0.860494	2.2325
		Weighted mode	15	0.338073	0.23222	0.167496	-0.117078	0.793224	1.40224	0.889516	2.21051
		Weighted median	15	0.326091	0.147522	0.0270735	0.0369478	0.615234	1.38554	1.03764	1.85009
genus Lachnoclostridium	Premature rupture of membranes	MR Egger	13	1.27902	0.49198	0.0247051	0.314743	2.24331	3.59313	1.36991	9.42443
		Inverse variance weighted	13	0.217239	0.151216	0.150827	-0.0791443	0.513623	1.24264	0.923907	1.67134
		Simple mode	13	0.412387	0.360389	0.274818	-0.293975	1.11875	1.51042	0.745295	3.06102
		Weighted mode	13	0.460139	0.330845	0.189539	-0.188318	1.1086	1.58429	0.828351	3.0301
		Weighted median	13	0.226439	0.2086	0.277691	-0.182416	0.635295	1.25413	0.833255	1.88758
genus Marvinbryantia	Premature rupture of membranes	MR Egger	10	-0.346431	0.565538	0.557169	-1.45489	0.762024	0.707208	0.233427	2.14261
		Inverse variance weighted	10	-0.306335	0.144275	0.0337314	-0.589114	-0.0235555	0.73614	0.554819	0.97672
		Simple mode	10	-0.423953	0.301732	0.193565	-1.01535	0.167441	0.654454	0.362276	1.18228
		Weighted mode	10	-0.38275	0.264514	0.181815	-0.901198	0.135697	0.681983	0.406083	1.14534
		Weighted median	10	-0.360149	0.188995	0.056702	-0.730579	0.0102811	0.697572	0.48163	1.01033
genus Ruminococcaceae UCG003	Premature rupture of membranes	MR Egger	12	-0.286529	0.43875	0.528447	-1.14648	0.573421	0.750865	0.317754	1.77433
		Inverse variance weighted	12	-0.309822	0.130278	0.0173991	-0.565166	-0.0544773	0.733578	0.568266	0.94698
		Simple mode	12	-0.428658	0.318293	0.205156	-1.05251	0.195196	0.651383	0.34906	1.21555
		Weighted mode	12	-0.299139	0.318385	0.367622	-0.923174	0.324896	0.741456	0.397256	1.38389
		Weighted median	12	-0.260177	0.18062	0.149736	-0.614193	0.0938387	0.770915	0.541077	1.09838
genus Ruminococcaceae UCG010	Premature rupture of membranes	MR Egger	6	0.868507	0.471834	0.139484	-0.0562863	1.7933	2.38335	0.945268	6.00926
		Inverse variance weighted	6	0.318979	0.170953	0.0620571	-0.0160889	0.654047	1.37572	0.98404	1.92331
		Simple mode	6	0.559069	0.345063	0.166117	-0.117255	1.23539	1.74904	0.889358	3.43973
		Weighted mode	6	0.572644	0.321463	0.134957	-0.0574236	1.20271	1.77295	0.944194	3.32913
		Weighted median	6	0.58	0.234718	0.0134717	0.119952	1.04005	1.78604	1.12744	2.82935
genus Turicibacter	Premature rupture of membranes	MR Egger	10	0.160725	0.501077	0.756612	-0.821387	1.14284	1.17436	0.439821	3.13565
		Inverse variance weighted	10	0.248105	0.116668	0.0334539	0.0194361	0.476774	1.28159	1.01963	1.61087
		Simple mode	10	0.215135	0.221561	0.356919	-0.219124	0.649394	1.24003	0.803222	1.91438
		Weighted mode	10	0.199248	0.207646	0.362346	-0.207738	0.606234	1.22048	0.81242	1.83351
		Weighted median	10	0.203985	0.161496	0.206556	-0.112548	0.520518	1.22628	0.893555	1.6829
order Actinomycetales	Premature rupture of membranes	MR Egger	5	-0.614798	0.535615	0.334269	-1.6646	0.435008	0.54075	0.189266	1.54498
		Inverse variance weighted	5	-0.300666	0.216943	0.165772	-0.725875	0.124543	0.740325	0.483901	1.13263
		Simple mode	5	-0.486205	0.26576	0.141312	-1.00709	0.034685	0.614956	0.365279	1.03529
		Weighted mode	5	-0.513015	0.209782	0.0707904	-0.924189	-0.101842	0.598688	0.396853	0.903173
		Weighted median	5	-0.493866	0.198916	0.0130361	-0.883742	-0.10399	0.610263	0.413234	0.901235
phylum Actinobacteria	Premature rupture of membranes	MR Egger	15	0.674179	0.569728	0.257865	-0.442488	1.79085	1.96242	0.642436	5.99452
		Inverse variance weighted	15	0.240193	0.134408	0.0739318	-0.0232479	0.503633	1.27149	0.97702	1.65472
		Simple mode	15	0.578256	0.335758	0.107034	-0.0798286	1.23634	1.78293	0.923275	3.44299
		Weighted mode	15	0.512491	0.269997	0.07849	-0.0167028	1.04168	1.66944	0.983436	2.83399
		Weighted median	15	0.376732	0.190407	0.0478658	0.00353362	0.74993	1.45751	1.00354	2.11685
phylum Tenericutes	Premature rupture of membranes	MR Egger	12	0.101994	0.410266	0.808698	-0.702127	0.906114	1.10738	0.49553	2.47469
		Inverse variance weighted	12	-0.256956	0.121448	0.0343648	-0.494994	-0.0189174	0.773402	0.609575	0.98126
		Simple mode	12	-0.316829	0.266783	0.260007	-0.839724	0.206067	0.728456	0.43183	1.22884
		Weighted mode	12	-0.221615	0.242939	0.381207	-0.697775	0.254544	0.801224	0.497692	1.28987
		Weighted median	12	-0.252091	0.161522	0.11859	-0.568673	0.0644924	0.777174	0.566276	1.06662
