# Supplementary material for: Causal associations between gut microbiota and premature rupture of membranes: a two-sample Mendelian randomization study
Source: Front Immunol. 2024 Sep 2;15:1440232. doi: 10.3389/fimmu.2024.1440232 (PMC11402717; doi:10.3389/fimmu.2024.1440232)
Supplement: Supplementary file 3 [file Table3.xlsx]

## Sheet: mr_heterogeneity
The results of heterogeneity analysis
exposure	outcome	method	Q	Q_df	Q_pval
class Mollicutes	Premature rupture of membranes	MR Egger	5.53603	10	0.852623
		Inverse variance weighted	6.37504	11	0.847206
family Actinomycetaceae	Premature rupture of membranes	MR Egger	7.46983	3	0.0583388
		Inverse variance weighted	8.51344	4	0.074481
genus Collinsella	Premature rupture of membranes	MR Egger	7.08072	7	0.420524
		Inverse variance weighted	7.30463	8	0.50415
genus Dorea	Premature rupture of membranes	MR Egger	10.0504	8	0.261504
		Inverse variance weighted	11.9761	9	0.21466
genus Family XIII AD3011 group	Premature rupture of membranes	MR Egger	18.0586	11	0.0802306
		Inverse variance weighted	18.1191	12	0.11212
genus Intestinibacter	Premature rupture of membranes	MR Egger	7.07343	13	0.898328
		Inverse variance weighted	7.16236	14	0.928271
genus Lachnoclostridium	Premature rupture of membranes	MR Egger	7.97249	11	0.715766
		Inverse variance weighted	13.0725	12	0.363791
genus Marvinbryantia	Premature rupture of membranes	MR Egger	7.42308	8	0.491748
		Inverse variance weighted	7.42845	9	0.592603
genus Ruminococcaceae UCG003	Premature rupture of membranes	MR Egger	10.6425	10	0.386042
		Inverse variance weighted	10.6458	11	0.473397
genus Ruminococcaceae UCG010	Premature rupture of membranes	MR Egger	2.62817	4	0.621841
		Inverse variance weighted	4.18959	5	0.522455
genus Turicibacter	Premature rupture of membranes	MR Egger	7.15881	8	0.519599
		Inverse variance weighted	7.19096	9	0.617245
order Actinomycetales	Premature rupture of membranes	MR Egger	7.44561	3	0.0589725
		Inverse variance weighted	8.50159	4	0.0748389
phylum Actinobacteria	Premature rupture of membranes	MR Egger	11.311	13	0.584786
		Inverse variance weighted	11.9254	14	0.612294
phylum Tenericutes	Premature rupture of membranes	MR Egger	5.53603	10	0.852623
		Inverse variance weighted	6.37504	11	0.847206
