# Supplementary material for: Causal associations between gut microbiota and premature rupture of membranes: a two-sample Mendelian randomization study
Source: Front Immunol. 2024 Sep 2;15:1440232. doi: 10.3389/fimmu.2024.1440232 (PMC11402717; doi:10.3389/fimmu.2024.1440232)
Supplement: Supplementary file 4 [file Table4.xlsx]

## Sheet: mr_pleiotropy
The results of pleiotropy analysis
exposure	outcome	egger_intercept	se	pval
class Mollicutes	Premature rupture of membranes	-0.0328395	0.035852	0.381239
family Actinomycetaceae	Premature rupture of membranes	0.0370555	0.0572372	0.563496
genus Collinsella	Premature rupture of membranes	-0.0214433	0.0455762	0.652311
genus Dorea	Premature rupture of membranes	0.0436435	0.0352514	0.250791
genus Family XIII AD3011 group	Premature rupture of membranes	0.0125411	0.0653098	0.851222
genus Intestinibacter	Premature rupture of membranes	0.00867684	0.0290957	0.77025
genus Lachnoclostridium	Premature rupture of membranes	-0.0744365	0.0329609	0.0452245
genus Marvinbryantia	Premature rupture of membranes	0.00356639	0.0486379	0.943348
genus Ruminococcaceae UCG003	Premature rupture of membranes	-0.0018097	0.0324494	0.956624
genus Ruminococcaceae UCG010	Premature rupture of membranes	-0.0417792	0.0334349	0.279582
genus Turicibacter	Premature rupture of membranes	0.00942994	0.0525891	0.86215
order Actinomycetales	Premature rupture of membranes	0.0372747	0.0571447	0.560738
phylum Actinobacteria	Premature rupture of membranes	-0.0270173	0.0344666	0.447164
phylum Tenericutes	Premature rupture of membranes	-0.0328395	0.035852	0.381239
